# Supplementary material for: Transcriptional programming of lipid and amino acid metabolism by the skeletal muscle circadian clock
Source: PLoS Biol. 2018 Aug 10;16(8):e2005886. doi: 10.1371/journal.pbio.2005886 (PMC6105032; doi:10.1371/journal.pbio.2005886)
Supplement: S1 Data — (XLSX) [file pbio.2005886.s001.xlsx]

## Sheet: Fig.2B,C,D,E,F
Fig.2B	Data extrapolated from Gene Expression Omnibus, accession number GSE43071
mogene10stv1mmentrezgprobe ID	Gene Symbol	avg. WT_TA_ZT0	avg. WT_TA_ZT4	avg. WT_TA_ZT8	avg. WT_TA_ZT12	avg. WT_TA_ZT16	avg. WT_TA_ZT20	avg. KO_TA_ZT0	avg. KO_TA_ZT4	avg. KO_TA_ZT8	avg. KO_TA_ZT12	avg. KO_TA_ZT16	avg. KO_TA_ZT20	SEM WT_TA_ZT0	SEM WT_TA_ZT4	SEM WT_TA_ZT8	SEM WT_TA_ZT12	SEM WT_TA_ZT16	SEM WT_TA_ZT20	SEM KO_TA_ZT0	SEM KO_TA_ZT4	SEM KO_TA_ZT8	SEM KO_TA_ZT12	SEM KO_TA_ZT16	SEM KO_TA_ZT20
11988_at	Slc7a2	948.802	816.262	1038.15	1137.79	1280.63	1206.25	594.015	496.02	564.488	519.906	616.199	621.443	84.546	36.0722	83.2776	105.945	23.6861	83.9764	74.0389	8.99508	60.6838	27.0343	86.6105	44.8406
67876_at	Coq10b	290.493	429.811	501.364	498.264	433.735	289.184	251.55	218.535	226.329	251.278	264.793	235.641	12.8692	28.6022	15.6432	49.8473	36.0292	17.0214	13.4992	19.027	15.4789	14.8418	12.1214	8.78142
Fig.2C	Western Blot processing
Legend:				1) Scan films--> 600dpi				2) make grayscale					3) crop & arrange
lane	Geno	timepoint (ZT)
1	ladder												REV-ERB alpha
2	blank
3	WT	WT_0											REV-ERB beta
4	WT	WT_4
5	WT	WT_8											GAPDH
6	WT	WT_12
7	WT	WT_16
8	WT	WT_20
9	KO	mKO_0
10	KO	mKO_4
11	KO	mKO_8
12	KO	mKO_12
13	KO	mKO_16
14	KO	mKO_20
15	blank
16	WT	pos.ctrl1
17	KO	neg.ctrl1
18	WT	pos.ctrl2
19	KO	neg.ctrl2
20	ladder
Fig2D	Data extrapolated from Gene Expression Omnibus, accession number GSE43071
mogene10stv1mmentrezgprobe ID	Gene Symbol	avg. WT_TA_ZT0	avg. WT_TA_ZT4	avg. WT_TA_ZT8	avg. WT_TA_ZT12	avg. WT_TA_ZT16	avg. WT_TA_ZT20	avg. KO_TA_ZT0	avg. KO_TA_ZT4	avg. KO_TA_ZT8	avg. KO_TA_ZT12	avg. KO_TA_ZT16	avg. KO_TA_ZT20	SEM WT_TA_ZT0	SEM WT_TA_ZT4	SEM WT_TA_ZT8	SEM WT_TA_ZT12	SEM WT_TA_ZT16	SEM WT_TA_ZT20	SEM KO_TA_ZT0	SEM KO_TA_ZT4	SEM KO_TA_ZT8	SEM KO_TA_ZT12	SEM KO_TA_ZT16	SEM KO_TA_ZT20
12575_at	Cdkn1a	290.658	288.689	246.787	204.118	302.606	242.21	2189.46	1582.91	1957.62	1301.53	2535.92	2018.7	16.8602	13.6518	25.0303	9.70775	57.2137	16.9015	157.065	65.3403	421.835	97.6573	381.383	224.939
53412_at	Ppp1r3c	3479.64	2432.26	1226.87	1356.27	3140.55	3120.78	3265.53	2346.25	2052.21	2525.13	4145.01	3735.99	225.661	83.0732	183.285	108.458	118.947	173.625	81.5517	120.902	134.132	412.67	474.371	233.509
53311_at	Mybph	231.593	158.945	176.423	231.671	265.091	186.192	357.543	336.479	302.888	444.353	574.158	424.752	12.3239	7.70211	25.1498	41.4138	14.5397	9.94427	32.4855	23.4392	26.3152	78.3763	77.0558	16.6674
229665_at	Ampd1	6363.64	5980.55	5826.47	5661.19	5716.72	5745.45	7409.04	7496.57	7692.46	7370.42	7420.67	7427.94	198.29	88.663	132.803	221.447	311.971	116.732	330.741	12.6443	103.325	185.747	346.527	69.9789
21833_at	Thra	1341.68	1269.68	1339.74	1261.35	1054.14	1064.48	1726.86	1759.02	1559.57	1645.27	1371.47	1547.64	24.2827	25.1187	71.363	16.6228	21.4643	11.4391	17.8706	73.4549	43.4154	55.2996	76.6514	92.248
Fig2E	Data extrapolated from Gene Expression Omnibus, accession number GSE43071
mogene10stv1mmentrezgprobe ID	Gene Symbol	avg. WT_TA_ZT0	avg. WT_TA_ZT4	avg. WT_TA_ZT8	avg. WT_TA_ZT12	avg. WT_TA_ZT16	avg. WT_TA_ZT20	avg. KO_TA_ZT0	avg. KO_TA_ZT4	avg. KO_TA_ZT8	avg. KO_TA_ZT12	avg. KO_TA_ZT16	avg. KO_TA_ZT20	SEM WT_TA_ZT0	SEM WT_TA_ZT4	SEM WT_TA_ZT8	SEM WT_TA_ZT12	SEM WT_TA_ZT16	SEM WT_TA_ZT20	SEM KO_TA_ZT0	SEM KO_TA_ZT4	SEM KO_TA_ZT8	SEM KO_TA_ZT12	SEM KO_TA_ZT16	SEM KO_TA_ZT20
66853_at	Pnpla2	1875.47	2010.6	2118.8	1976.46	2207.51	1817.89	2324.45	2240.9	2409.61	2338.03	2440.35	2205.49	71.6588	35.8829	19.1597	72.2364	104.69	71.4454	43.8142	37.3763	113.206	58.3408	127.256	62.7483
66968_at	Plin5	195.697	196.766	197.154	190.77	185.419	175.305	286.266	250.264	292.276	303.175	322.183	268.407	18.2904	10.3882	35.9647	5.20068	10.7546	6.13033	33.8774	6.45064	20.9469	8.43541	27.0057	10.5902
26458_at	Slc27a2	228.147	45.2794	35.072	35.8792	38.1033	34.1747	38.0541	39.6649	38.7352	38.4058	34.9943	34.4704	191.559	10.2205	1.95295	2.02869	2.3711	2.34087	2.69198	0.656961	1.57827	6.27697	0.742873	1.52071
14081_at	Acsl1	3860.73	4093.49	4197.43	4347.27	3880.01	3616.17	5043.11	4861.55	5354.09	5134.67	5107.45	4717.04	31.2004	112.316	41.5181	142.82	127.864	138.336	254.584	79.362	77.6029	51.4016	236.614	106.453
11364_at	Acadm	5190.15	4933.99	4820.65	4834.1	4576.3	4568.79	6356.99	6242.14	6041.36	5707.84	5762.91	5910.91	182.336	215.679	201.745	213.408	460.021	63.9905	60.3766	309.655	372.063	67.2694	255.567	165.702
97212_at	Hadha	3335.69	3262.19	3339.71	3556.22	3364.07	3111.96	3855.21	3878.13	3903.91	3874.47	4091.98	3722.92	50.9299	60.4559	238.539	30.9258	232.465	37.5752	110.367	44.9054	38.6956	142.977	164.256	86.9205
Fig2F	Data extrapolated from Gene Expression Omnibus, accession number GSE43071
mogene10stv1mmentrezgprobe ID	Gene Symbol	avg. WT_TA_ZT0	avg. WT_TA_ZT4	avg. WT_TA_ZT8	avg. WT_TA_ZT12	avg. WT_TA_ZT16	avg. WT_TA_ZT20	avg. KO_TA_ZT0	avg. KO_TA_ZT4	avg. KO_TA_ZT8	avg. KO_TA_ZT12	avg. KO_TA_ZT16	avg. KO_TA_ZT20	SEM WT_TA_ZT0	SEM WT_TA_ZT4	SEM WT_TA_ZT8	SEM WT_TA_ZT12	SEM WT_TA_ZT16	SEM WT_TA_ZT20	SEM KO_TA_ZT0	SEM KO_TA_ZT4	SEM KO_TA_ZT8	SEM KO_TA_ZT12	SEM KO_TA_ZT16	SEM KO_TA_ZT20
433766_at	Trim63	964.2	1282.93	967.636	937.72	1026.82	1084.17	972.039	1129.12	1534.46	1275.15	1195.09	897.384	18.3617	54.1082	63.3107	34.1143	58.1214	44.8893	119.135	80.406	58.687	74.3481	72.5217	55.5795
67731_at	Fbxo32	2208.93	2639.21	1962.77	1646.98	1283.59	1615.54	1780.36	2237.57	2878.59	1889.37	1149.54	1284.59	238.804	145.744	217.585	104.698	20.8447	164.615	122.307	107.523	480.495	78.8401	194.286	186.854
22190_at	Ubc	1667.34	1649.4	1192.74	1225.77	1427.66	1500.53	1681.16	1763.95	1991.84	1662.55	1368.78	1648.43	27.6566	75.9278	95.6221	120.655	37.2581	65.1463	218.807	173.923	92.5677	18.2342	36.8663	79.4239
19175_at	Psmb6	1213.49	1326.85	1262.31	1186.74	1287.64	1329.5	1359.71	1360.12	1471.29	1426.02	1494.91	1414.09	17.152	16.6364	32.8133	60.7177	33.3013	21.5489	33.5593	19.1176	14.7301	48.0466	80.3438	12.9603
22241_at	Ulk1	621.915	740.029	722.114	694.785	772.819	750.993	692.755	735.681	813.337	883.187	793.364	720.493	65.9268	35.5685	31.9302	9.40456	14.3086	35.1753	13.7764	28.3672	25.4032	42.5405	29.3981	35.1781
67760_at	Slc38a2	2912.6	2641.67	1989.3	1743.57	3445.49	3153.61	2821.81	2520.43	2703.53	2574.2	3177.95	2964.54	163.491	125.917	226.467	105.384	266.535	117.831	43.4905	30.4216	28.5591	28.4972	139.223	136.61

## Sheet: Fig.3B
Fig.3B Ranked list of metabolites in heatmap
BIOCHEMOCAL	PATHWAY_SORTORDER	SUPER_PATHWAY	SUB_PATHWAY	COMP_ID	PLATFORM	RI	MASS	CAS	PUBCHEM	KEGG	GroupHMDB
methylphosphate	1193	Nucleotide	Purine and pyrimidine metabolism	37070	GC/MS	1221	241	7023-27-0;	13130
octanoylcarnitine	825	Lipid	Carnitine metabolism	33936	LC/MS Pos	4100	288	3671-77-0;	123701
nicotinamide	1221	Cofactors and vitamins	Nicotinate and nicotinamide metabolism	594	LC/MS Pos	1267	123	98-92-0;	936	C00153	HMDB01406
hypoxanthine	1098	Nucleotide	Purine metabolism, (hypo)xanthine/inosine containing	3127	LC/MS Neg	1313	135	68-94-0;	790	C00262	HMDB00157
1,5-anhydroglucitol (1,5-AG)	515	Carbohydrate	Glycolysis, gluconeogenesis, pyruvate metabolism	20675	GC/MS	1789	217	154-58-5;		C07326	HMDB02712
creatine	259	Amino acid	Creatine metabolism	27718	LC/MS Pos	758	132	57-00-1;	586	C00300	HMDB00064
4-hydroxy-2-nonenal	1091	Lipid	Lipid peroxidation	38309	LC/MS Pos	4537	157	75899-68-2;	1693		HMDB04362
campesterol	1059	Lipid	Sterol/Steroid	33997	GC/MS	2353	129	474-62-4;	173183	C01789	HMDB02869
serine	8	Amino acid	Glycine, serine and threonine metabolism	1648	GC/MS	1389	204	56-45-1;	59516857581	C00065	HMDB03406
uridine	1180	Nucleotide	Pyrimidine metabolism, uracil containing	606	LC/MS Neg	1467	243	58-96-8;	6029	C00299	HMDB00296
N-acetylthreonine	18	Amino acid	Glycine, serine and threonine metabolism	33939	LC/MS Neg	846	160		4651717	C01118
histidine	50	Amino acid	Histidine metabolism	59	LC/MS Neg	757	154	5934-29-2;	7733651426	C00135	HMDB00177
citrulline	248	Amino acid	Urea cycle; arginine-, proline-, metabolism	2132	LC/MS Pos	715	176	372-75-8;	833	C00327	HMDB00904
cysteine-glutathione disulfide	284	Amino acid	Glutathione metabolism	35159	LC/MS Pos	821	427	13081-14-6;	4247235		HMDB00656
inosine 5'-monophosphate (IMP)	1101	Nucleotide	Purine metabolism, (hypo)xanthine/inosine containing	2133	LC/MS Neg	700	347	4691-65-0;	7140378	C00130	HMDB00175
beta-alanine	26	Amino acid	Alanine and aspartate metabolism	55	GC/MS	1452	174	56-41-7;107-95-9;	2394755801	C00099	HMDB00056
putrescine	267	Amino acid	Polyamine metabolism	1408	GC/MS	1706	174	110-60-1;		C00134	HMDB01414
ethanolamine	876	Lipid	Glycerolipid metabolism	1497	GC/MS	1304	174	141-43-5;		C00189	HMDB00149
C-glycosyltryptophan*	164	Amino acid	Tryptophan metabolism	32675	LC/MS Pos	1912	367
mead acid (20:3n9)	658	Lipid	Long chain fatty acid	35174	LC/MS Neg	5642	305	20590-32-3;	5312531		HMDB10378
laurate (12:0)	625	Lipid	Medium chain fatty acid	1645	LC/MS Neg	5288	199	143-07-7;	3893	C02679	HMDB00638
uridine monophosphate (5' or 3')	1187	Nucleotide	Pyrimidine metabolism, uracil containing	39879	LC/MS Pos	1079	325
oxamate	1352	Xenobiotics	Chemical	20706	GC/MS	1280	188	471-47-6;	974	C01444
Isobar: 2-propylpentanoate, 2-ethylhexanoate	1360	Xenobiotics	Chemical	35490	LC/MS Neg	3909	143
caproate (6:0)	618	Lipid	Medium chain fatty acid	32489	LC/MS Neg	2766	115	142-62-1;	8892	C01585	HMDB00535
myristoleate (14:1n5)	630	Lipid	Long chain fatty acid	32418	LC/MS Neg	5338	225	544-64-9 ;	5281119	C08322	HMDB02000
kynurenine	144	Amino acid	Tryptophan metabolism	15140	LC/MS Pos	1902	209	2922-83-0;	1611670000000	C00328	HMDB00684
gamma-glutamylleucine	404	Peptide	gamma-glutamyl	18369	LC/MS Pos	2744	261	2566-39-4;	151023		HMDB11171
cytidine 5'-monophosphate (5'-CMP)	1157	Nucleotide	Pyrimidine metabolism, cytidine containing	2372	LC/MS Pos	887	324	63-37-6;	7058165	C00055	HMDB00095
xanthine	1095	Nucleotide	Purine metabolism, (hypo)xanthine/inosine containing	3147	LC/MS Pos	1430	153	69-89-6;	1188	C00385	HMDB00292
dihomo-linoleate (20:2n6)	655	Lipid	Long chain fatty acid	17805	LC/MS Neg	5722	307	2091-39-6;	6439848	C16525
10-nonadecenoate (19:1n9)	648	Lipid	Long chain fatty acid	33972	LC/MS Neg	5775	295	73033-09-7;	5312513
oleoylcarnitine	835	Lipid	Carnitine metabolism	35160	LC/MS Pos	5202	426				HMDB05065
palmitoylcarnitine	833	Lipid	Carnitine metabolism	22189	LC/MS Pos	5179	400	6865-14-1;	461
stearoylcarnitine	834	Lipid	Carnitine metabolism	34409	LC/MS Pos	5300	428	18822-91-8;			HMDB00848
myristoylcarnitine	831	Lipid	Carnitine metabolism	33952	LC/MS Pos	5113	372	18822-89-4;	6426854
choline	881	Lipid	Glycerolipid metabolism	15506	LC/MS Pos	674	104	67-48-1;	170746
arabitol	546	Carbohydrate	Nucleotide sugars, pentose metabolism	15964	GC/MS	1688	217	488-82-4;	94154	C00474	HMDB01851
glutamine	44	Amino acid	Glutamate metabolism	53	LC/MS Pos	684	147	56-85-9;	69920865961	C00064	HMDB00641
5-oxoproline	282	Amino acid	Glutathione metabolism	1494	LC/MS Pos	1446	130	98-79-3;	7405	C01879	HMDB00267
cytidine	1153	Nucleotide	Pyrimidine metabolism, cytidine containing	514	LC/MS Neg	1351	242	65-46-3;	6175	C00475	HMDB00089
citrate	579	Energy	Krebs cycle	1564	GC/MS	1763	273	77-92-9;	311	C00158	HMDB00094
xylitol	565	Carbohydrate	Nucleotide sugars, pentose metabolism	4966	GC/MS	1678	307	87-99-0;	6912	C00379	HMDB00568
mannitol	483	Carbohydrate	Fructose, mannose, galactose, starch, and sucrose metabolism	15335	GC/MS	1839	319	69-65-8;	6251	C00392	HMDB00765
galactitol (dulcitol)	473	Carbohydrate	Fructose, mannose, galactose, starch, and sucrose metabolism	1117	GC/MS	1849	319	608-66-2;	11850	C01697	HMDB00107
glutathione, oxidized (GSSG)	283	Amino acid	Glutathione metabolism	27727	LC/MS Pos	1535	613	103239-24-3;	6535910000000	C00127	HMDB03337
pyrophosphate (PPi)	603	Energy	Oxidative phosphorylation	2078	GC/MS	1642	451	1466-09-3;	644102	C00013	HMDB00250
N-acetylaspartate (NAA)	29	Amino acid	Alanine and aspartate metabolism	32195	GC/MS	1642	158	997-55-7;997-55-7 ;	65065	C01042	HMDB00812
13-methylmyristic acid	742	Lipid	Fatty acid, branched	38293	LC/MS Neg	5498	241	2485-71-4;	151014
adenosine 5'-monophosphate (AMP)	1114	Nucleotide	Purine metabolism, adenine containing	32342	LC/MS Pos	1210	348	149022-20-8;	15938965	C00020	HMDB00045
phenol sulfate	135	Amino acid	Phenylalanine & tyrosine metabolism	32553	LC/MS Neg	2199	173	937-34-8;	74426	C02180
pseudouridine	1181	Nucleotide	Pyrimidine metabolism, uracil containing	33442	LC/MS Pos	1180	245	1445-07-4;		C02067	HMDB00767
3-indoxyl sulfate	170	Amino acid	Tryptophan metabolism	27672	LC/MS Neg	2258	212	2642-37-7;	10258		HMDB00682
phenylacetylglycine	127	Amino acid	Phenylalanine & tyrosine metabolism	33945	LC/MS Neg	2377	192	500-98-1;	68144	C05598	HMDB00821
hippurate	1288	Xenobiotics	Benzoate metabolism	15753	LC/MS Neg	2136	178	495-69-2;	464	C01586	HMDB00714
caprylate (8:0)	620	Lipid	Medium chain fatty acid	32492	LC/MS Neg	4367	143	124-07-2;	379	C06423	HMDB00482
fucose	461	Carbohydrate	Aminosugars metabolism	15821	GC/MS	1682	204	2438-80-4;	3034656	C00382	HMDB00174
2-oleoylglycerophosphocholine*	937	Lipid	Lysolipid	35254	LC/MS Pos	5640	522
glutarate (pentanedioate)	63	Amino acid	Lysine metabolism	396	GC/MS	1434	261	110-94-1;	4418048	C00489	HMDB00661
adenosine	1106	Nucleotide	Purine metabolism, adenine containing	555	LC/MS Pos	1650	268	58-61-7;	60961	C00212	HMDB00050
2-stearoylglycerophosphocholine*	935	Lipid	Lysolipid	35255	LC/MS Pos	5780	524		10208382
margarate (17:0)	635	Lipid	Long chain fatty acid	1121	LC/MS Neg	5733	269	506-12-7;	10465		HMDB02259
2-docosapentaenoylglycerophosphoethanolamine*	922	Lipid	Lysolipid	34875	LC/MS Pos	5548	528
2-docosapentaenoylglycerophosphocholine*	947	Lipid	Lysolipid	37366	LC/MS Pos	5532	570
1-heptadecanoylglycerophosphocholine	933	Lipid	Lysolipid	33957	LC/MS Pos	5750	510	50930-23-9;			HMDB12108
1-pentadecanoylglycerophosphocholine*	928	Lipid	Lysolipid	37418	LC/MS Pos	5563	482
docosahexaenoate (DHA; 22:6n3)	613	Lipid	Essential fatty acid	19323	LC/MS Neg	5518	327	6217-54-5;	445580	C06429	HMDB02183
docosapentaenoate (n3 DPA; 22:5n3)	611	Lipid	Essential fatty acid	32504	LC/MS Neg	5574	329	2234-74-4 ;		C16513	HMDB01976
guanosine 5'- monophosphate (5'-GMP)	1131	Nucleotide	Purine metabolism, guanine containing	2849	LC/MS Pos	1300	364	5550-12-9;	761
cysteine	213	Amino acid	Cysteine, methionine, SAM, taurine metabolism	31453	GC/MS	1560	218	52-90-4;56-89-3;	58626419722	C00097	HMDB00574
2-oleoylglycerophosphoethanolamine*	916	Lipid	Lysolipid	35687	LC/MS Neg	5848	478
nonadecanoate (19:0)	647	Lipid	Long chain fatty acid	1356	LC/MS Neg	6073	297	646-30-0;	12591	C16535	HMDB00772
allantoin	1150	Nucleotide	Purine metabolism, urate metabolism	1107	GC/MS	1810	518	97-59-6;	204	C02350	HMDB00462
erythronate*	453	Carbohydrate	Aminosugars metabolism	33477	GC/MS	1547	292	13752-84-6;	2781043		HMDB00613
2-palmitoylglycerophosphoethanolamine*	910	Lipid	Lysolipid	35684	LC/MS Pos	5598	454
2-arachidonoylglycerophosphoinositol*	960	Lipid	Lysolipid	38077	LC/MS Neg	5456	619
ergothioneine	1565	Xenobiotics	Food component/Plant	37459	LC/MS Pos	847	230	58511-63-0;	3032311	C05570	HMDB03045
pyruvate	535	Carbohydrate	Glycolysis, gluconeogenesis, pyruvate metabolism	599	GC/MS	1131	217	127-17-3;	107735	C00022	HMDB00243
spermidine	270	Amino acid	Polyamine metabolism	485	LC/MS Pos	533	146	124-20-9;	1102	C00315	HMDB01257
N-glycolylneuraminate	1568	Xenobiotics	Food component/Plant	37123	GC/MS	2119	444	1113-83-3;	4603312	C03410	HMDB00833
1-arachidonoylglycerophosphoinositol*	959	Lipid	Lysolipid	34214	LC/MS Neg	5479	619
3-ureidopropionate	26.11	Amino acid	Alanine and aspartate metabolism	3155	LC/MS Pos	1062	133	462-88-4;	111	C02642	HMDB00026
serylleucine	389	Peptide	Dipeptide	40066	LC/MS Pos	2106	219	6665-16-3;
17-methylstearate	746	Lipid	Fatty acid, branched	38296	LC/MS Neg	5987	297	2724-59-6;	3083779
aspartylleucine	360	Peptide	Dipeptide	40068	LC/MS Pos	2310	247	3062-14-4;	332962
glycerol 2-phosphate	1324	Xenobiotics	Chemical	27728	GC/MS	1692	243	819-83-0;	2526	C02979,D01488	HMDB02520
ribulose	559	Carbohydrate	Nucleotide sugars, pentose metabolism	35855	GC/MS	1662	306	488-84-6;	79021	C00309	HMDB00621,HMDB03371
ribose	554	Carbohydrate	Nucleotide sugars, pentose metabolism	12080	GC/MS	1639	204	50-69-1;	5311110	C00121	HMDB00283
Isobar: ribulose 5-phosphate, xylulose 5-phosphate	561	Carbohydrate	Nucleotide sugars, pentose metabolism	37288	GC/MS	1935	357
pentadecanoate (15:0)	631	Lipid	Long chain fatty acid	1361	LC/MS Neg	5522	241	1002-84-2;	13849	C16537	HMDB00826
glycylleucine	301	Peptide	Dipeptide	34398	LC/MS Pos	2236	189	869-19-2;	928432000000	C02155	HMDB00759
inositol 1-phosphate (I1P)	893	Lipid	Inositol metabolism	1481	GC/MS	2058	318	106032-59-1;			HMDB00213
glycolate (hydroxyacetate)	1318	Xenobiotics	Chemical	15737	GC/MS	1119	177	79-14-1;	3698251757	C00160	HMDB00115
erythritol	1632	Xenobiotics	Sugar, sugar substitute, starch	20699	GC/MS	1518	217	149-32-6;		C00503	HMDB02994
ribose 5-phosphate	557	Carbohydrate	Nucleotide sugars, pentose metabolism	561	GC/MS	1928	315	18265-46-8;108321-05-7;	447634	C00117	HMDB00618
acetylphosphate	601	Energy	Oxidative phosphorylation	15488	GC/MS	1263	211	94249-01-1;	186	C00227	HMDB01494
glycerol 3-phosphate (G3P)	882	Lipid	Glycerolipid metabolism	15365	GC/MS	1720	357	29849-82-9;	754	C00093	HMDB00126
leucylglycine	378	Peptide	Dipeptide	40045	LC/MS Pos	1800	189	686-50-0;	79070
1,2-dipalmitoylglycerol	989	Lipid	Diacylglycerol	11953	GC/MS	2595	145	40290-32-2;	99931		HMDB07098
2-palmitoylglycerol (2-monopalmitin)	971	Lipid	Monoacylglycerol	33419	GC/MS	2108	129	23470-00-0;	123409
1-palmitoylglycerol (1-monopalmitin)	970	Lipid	Monoacylglycerol	21127	GC/MS	2120	371	542-44-9;	14900
1-stearoylglycerol (1-monostearin)	972	Lipid	Monoacylglycerol	21188	GC/MS	2187	399	123-94-4;	24699	D01947
1,3-dipalmitoylglycerol	990	Lipid	Diacylglycerol	35728	GC/MS	2637	371	26657-95-4;	68149
creatinine	260	Amino acid	Creatine metabolism	513	LC/MS Pos	730	114	60-27-5;	588	C00791	HMDB00562
dimethylallyl pyrophosphate (DMAPP)	1017	Lipid	Mevalonate metabolism	35844	GC/MS	1492	211	358-72-5;	647	C00235	HMDB01120
quebrachitol	1598	Xenobiotics	Food component/Plant	37088	GC/MS	1797	217	642-38-6;
hypotaurine	221	Amino acid	Cysteine, methionine, SAM, taurine metabolism	590	GC/MS	1599	188	300-84-5;	107812	C00519	HMDB00965
betaine	22	Amino acid	Glycine, serine and threonine metabolism	3141	LC/MS Pos	721	118	107-43-7;	247		HMDB00043
malate	598	Energy	Krebs cycle	1303	GC/MS	1502	233	6915-15-7;	525	C00149	HMDB00156
sorbitol	495	Carbohydrate	Fructose, mannose, galactose, starch, and sucrose metabolism	15053	GC/MS	1843	319	6706-59-8;	107428	C00794	HMDB00247
phenylalanine	83	Amino acid	Phenylalanine & tyrosine metabolism	64	LC/MS Pos	2056	166	63-91-2;	69256656140	C00079	HMDB00159
valine	190	Amino acid	Valine, leucine and isoleucine metabolism	1649	LC/MS Pos	1040	118	72-18-4;	69710186287	C00183	HMDB00883
adrenate (22:4n6)	665	Lipid	Long chain fatty acid	32980	LC/MS Neg	5684	331	2091-25-0;	5282844	C16527	HMDB02226
aspartate	24	Amino acid	Alanine and aspartate metabolism	15996	GC/MS	1530	232	56-84-8;	5960	C00049	HMDB00191
N-acetylmethionine	227	Amino acid	Cysteine, methionine, SAM, taurine metabolism	1589	LC/MS Neg	1805	190	65-82-7;	448580	C02712	HMDB11745
stearoyl sphingomyelin	1005	Lipid	Sphingolipid	19503	GC/MS	2645	311	85187-10-6;85187-10-6;	6453725	C00550	HMDB01348
pinitol	892	Lipid	Inositol metabolism	37086	GC/MS	1773	318	10284-63-6;		C03844
trans-4-hydroxyproline	252	Amino acid	Urea cycle; arginine-, proline-, metabolism	32306	LC/MS Pos	705	132	51-35-4;	58106971053	C01157	HMDB00725
arachidonate (20:4n6)	659	Lipid	Long chain fatty acid	1110	LC/MS Neg	5525	303	506-32-1;	444899	C00219	HMDB01043
xylulose	571	Carbohydrate	Nucleotide sugars, pentose metabolism	18344	GC/MS	1668	306	551-84-8;	5289590	C00310	HMDB00654
1-heptadecanoylglycerophosphoethanolamine*	913	Lipid	Lysolipid	37419	LC/MS Neg	6029	466
threonine	17	Amino acid	Glycine, serine and threonine metabolism	1284	LC/MS Pos	713	120	72-19-5;	69710196288	C00188	HMDB00167
proline	246	Amino acid	Urea cycle; arginine-, proline-, metabolism	1898	LC/MS Pos	796	116	147-85-3;	1457430000000	C00148	HMDB00162
glutathione, reduced (GSH)	280	Amino acid	Glutathione metabolism	2127	LC/MS Pos	1274	308	70-18-8;	124886	C00051	HMDB00125
5-methylthioadenosine (MTA)	266	Amino acid	Polyamine metabolism	1419	LC/MS Pos	2427	298	2457-80-9;	439176	C00170	HMDB01173
adenine	1105	Nucleotide	Purine metabolism, adenine containing	554	GC/MS	1804	264	73-24-5;	190	C00147	HMDB00034
aspartylphenylalanine	325	Peptide	Dipeptide	22175	LC/MS Pos	2538	281	13433-09-5;	93078		HMDB00706
pipecolate	74	Amino acid	Lysine metabolism	1444	LC/MS Pos	1120	130	4043-87-2;	849	C00408	HMDB00070
cytidine 5'-diphosphocholine	886	Lipid	Glycerolipid metabolism	34418	LC/MS Pos	777	489	33818-15-4;
adenosine 3'-monophosphate (3'-AMP)	1113	Nucleotide	Purine metabolism, adenine containing	35142	LC/MS Pos	1451	348	84-21-9;	15938966	C01367	HMDB03540
deoxycarnitine	819	Lipid	Carnitine metabolism	36747	LC/MS Pos	759	146	6249-56-5;	725	C01181	HMDB01161
1-oleoylglycerophosphoinositol*	956	Lipid	Lysolipid	36602	LC/MS Neg	5577	597
4-guanidinobutanoate	275	Amino acid	Guanidino and acetamido metabolism	15681	LC/MS Pos	1085	146	463-003;463-00-3;	500	C01035	HMDB03464
docosapentaenoate (n6 DPA; 22:5n6)	612	Lipid	Essential fatty acid	37478	LC/MS Neg	5625	329	25182-74-5;	6441454	C06429	HMDB13123
adenosine 2'-monophosphate (2'-AMP)	1112	Nucleotide	Purine metabolism, adenine containing	36815	LC/MS Pos	1625	348	130-49-4;		C00946	HMDB11617
6'-sialyllactose	480	Carbohydrate	Fructose, mannose, galactose, starch, and sucrose metabolism	39795	GC/MS	2072	285	35890-39-2;		G00265	HMDB06569
alanine	27	Amino acid	Alanine and aspartate metabolism	1126	GC/MS	1148	116	56-41-7;	59507311724	C00041	HMDB00161
glycine	1	Amino acid	Glycine, serine and threonine metabolism	11777	GC/MS	1166	102	56-40-6;	5257127750	C00037	HMDB00123
glycerophosphorylcholine (GPC)	883	Lipid	Glycerolipid metabolism	15990	LC/MS Pos	694	258	28319-77-9;	657272	C00670	HMDB00086
N-acetyl-aspartyl-glutamate (NAAG)	48	Amino acid	Glutamate metabolism	35665	LC/MS Pos	1563	305	3106-85-2;	5255	C12270	HMDB01067
glutamate	39	Amino acid	Glutamate metabolism	57	LC/MS Pos	700	148	56-86-0;	611	C00025	HMDB03339
1-palmitoylglycerophosphoinositol*	951	Lipid	Lysolipid	35305	LC/MS Neg	5573	571
5-aminovalerate	247	Amino acid	Urea cycle; arginine-, proline-, metabolism	18319	GC/MS	1621	174	660-88-8;	6992101138	C00431	HMDB03355
1-stearoylglycerophosphoinositol	954	Lipid	Lysolipid	19324	LC/MS Neg	5800	599
sarcosine (N-Methylglycine)	2	Amino acid	Glycine, serine and threonine metabolism	1516	GC/MS	1183	116	107-97-1;	10887311726	C00213	HMDB00271
ribitol	548	Carbohydrate	Nucleotide sugars, pentose metabolism	15772	GC/MS	1692	217	488-81-3;		C00474	HMDB00508
cholesterol	1020	Lipid	Sterol/Steroid	63	GC/MS	2317	329	57-88-5;	6432564	C00187	HMDB00067
1-linoleoylglycerophosphoethanolamine*	917	Lipid	Lysolipid	32635	LC/MS Neg	5725	476				HMDB11507
1-palmitoylplasmenylethanolamine*	964	Lipid	Lysolipid	39270	LC/MS Neg	6153	436
2-linoleoylglycerophosphoethanolamine*	918	Lipid	Lysolipid	36593	LC/MS Neg	5650	476
1-oleoylglycerophosphoethanolamine	915	Lipid	Lysolipid	35628	LC/MS Neg	5928	478		9547071		HMDB11506
ophthalmate	285	Amino acid	Glutathione metabolism	34592	LC/MS Pos	1457	290	495-27-2;	9817431		HMDB05765
2-aminobutyrate	263	Amino acid	Butanoate metabolism	1577	GC/MS	1216	130	1492-24-6;	4396920000000	C02261	HMDB00650
leucine	181	Amino acid	Valine, leucine and isoleucine metabolism	60	LC/MS Pos	1674	132	61-90-5;	70457986106	C00123	HMDB00687
dehydroascorbate	1198	Cofactors and vitamins	Ascorbate and aldarate metabolism	1659	GC/MS	1800	245	490-83-5;	835	C05422	HMDB01264
isoleucine	180	Amino acid	Valine, leucine and isoleucine metabolism	1125	LC/MS Pos	1614	132	73-32-5;	791	C00407	HMDB00172
7-beta-hydroxycholesterol	1024	Lipid	Sterol/Steroid	35092	GC/MS	2340	456	566-27-8;	473141	C03594	HMDB06119
1-arachidonoylglycerophosphoethanolamine*	919	Lipid	Lysolipid	35186	LC/MS Neg	5731	500				HMDB11517
1-palmitoylglycerophosphoethanolamine	909	Lipid	Lysolipid	35631	LC/MS Neg	5940	452		9547069		HMDB11503
1-palmitoleoylglycerophosphoethanolamine*	911	Lipid	Lysolipid	34565	LC/MS Neg	5661	450
homoserine	12	Amino acid	Glycine, serine and threonine metabolism	23642	GC/MS	1471	218	672-15-1;	126477000000	C00263,C02926	HMDB00719
carnosine	397	Peptide	Dipeptide derivative	1768	LC/MS Neg	813	225	305-84-0;	4392250000000	C00386	HMDB00033
chiro-inositol	891	Lipid	Inositol metabolism	37112	GC/MS	1857	318	643-12-9;
methyl palmitate (15 or 2)	744	Lipid	Fatty acid, branched	38768	LC/MS Neg	5698	269
fumarate	594	Energy	Krebs cycle	1643	GC/MS	1382	245	100-17-8;		C00122	HMDB00134
myristate (14:0)	629	Lipid	Long chain fatty acid	1365	LC/MS Neg	5439	227	544-63-8;	11005	C06424	HMDB00806
palmitate (16:0)	632	Lipid	Long chain fatty acid	1336	LC/MS Neg	5619	255	57-10-3;	985	C00249	HMDB00220
flavin adenine dinucleotide (FAD)	1259	Cofactors and vitamins	Riboflavin metabolism	2134	LC/MS Neg	2413	784	146-14-5;84366-81-4;	643975	C00016	HMDB01248
2-palmitoylglycerophosphocholine*	930	Lipid	Lysolipid	35253	LC/MS Pos	5604	496
2-myristoylglycerophosphocholine*	927	Lipid	Lysolipid	35681	LC/MS Pos	5450	468
2-palmitoleoylglycerophosphocholine*	932	Lipid	Lysolipid	35819	LC/MS Pos	5482	494
1-arachidonoylglycerophosphocholine*	944	Lipid	Lysolipid	33228	LC/MS Pos	5554	544			C05208
sphingosine	995	Lipid	Sphingolipid	17747	LC/MS Pos	5197	300	123-78-4;	5353955	C00319	HMDB00252
2-docosahexaenoylglycerophosphocholine*	949	Lipid	Lysolipid	35883	LC/MS Pos	5507	568
2-docosahexaenoylglycerophosphoethanolamine*	923	Lipid	Lysolipid	34258	LC/MS Pos	5512	526
2-arachidonoylglycerophosphocholine*	945	Lipid	Lysolipid	35256	LC/MS Pos	5524	544
1-linoleoylglycerophosphocholine	938	Lipid	Lysolipid	34419	LC/MS Pos	5574	520		11988421	C04100
2-arachidonoylglycerophosphoethanolamine*	920	Lipid	Lysolipid	34656	LC/MS Pos	5525	502
1-palmitoylglycerophosphocholine	929	Lipid	Lysolipid	33955	LC/MS Pos	5671	496	17364-16-8;	86554
1-oleoylglycerophosphocholine	936	Lipid	Lysolipid	33960	LC/MS Pos	5700	522	19420-56-5;	16081932
2-linoleoylglycerophosphocholine*	939	Lipid	Lysolipid	35257	LC/MS Pos	5544	520
1-stearoylglycerophosphocholine	934	Lipid	Lysolipid	33961	LC/MS Pos	5844	524	19420-57-6;	497299
1-stearoylglycerophosphoethanolamine	914	Lipid	Lysolipid	34416	LC/MS Pos	5842	482	69747-55-3;	9547068		HMDB11130
1-palmitoleoylglycerophosphocholine*	931	Lipid	Lysolipid	33230	LC/MS Pos	5524	494
1-myristoylglycerophosphocholine	926	Lipid	Lysolipid	35626	LC/MS Pos	5481	468	20559-16-4;	460604		HMDB10379
dihomo-linolenate (20:3n3 or n6)	609	Lipid	Essential fatty acid	35718	LC/MS Neg	5600	305		5312529	C03242	HMDB02925
1,6-anhydroglucose	523	Carbohydrate	Glycolysis, gluconeogenesis, pyruvate metabolism	21049	GC/MS	1680	204	498-07-7;	11412545		HMDB00640
maltotetraose	508	Carbohydrate	Fructose, mannose, galactose, starch, and sucrose metabolism	15910	LC/MS Neg	965	665	34612-38-9;	446495	C02052	HMDB01296
maltotriose	502	Carbohydrate	Fructose, mannose, galactose, starch, and sucrose metabolism	15877	GC/MS	2419	204	1109-28-0;	439586	C01835	HMDB01262
adenosine 5'-diphosphate (ADP)	1116	Nucleotide	Purine metabolism, adenine containing	3108	LC/MS Pos	1005	428	20398-34-9;	6022	C00008	HMDB01341
mannose	487	Carbohydrate	Fructose, mannose, galactose, starch, and sucrose metabolism	584	GC/MS	1754	204	3458-28-4;	161658	C00159	HMDB00169
fructose	472	Carbohydrate	Fructose, mannose, galactose, starch, and sucrose metabolism	31266	GC/MS	1763	204	57-48-7;	5984	C00095	HMDB00660
arabinosylhypoxanthine	1098.1	Nucleotide	Purine metabolism, (hypo)xanthine/inosine containing	39269	GC/MS	2127	281	7013-16-3;
dihydroxyacetone phosphate (DHAP)	531	Carbohydrate	Glycolysis, gluconeogenesis, pyruvate metabolism	15522	GC/MS	1737	315	102783-56-2;	4643300	C00111	HMDB01473
13-HODE + 9-HODE	710	Lipid	Fatty acid, monohydroxy	37752	LC/MS Neg	5247	295
mannose-6-phosphate	489	Carbohydrate	Fructose, mannose, galactose, starch, and sucrose metabolism	1469	GC/MS	2005	387	70442-25-0;104872-94-8;		C00275	HMDB01078
fructose-6-phosphate	524	Carbohydrate	Glycolysis, gluconeogenesis, pyruvate metabolism	12021	GC/MS	1995	315	103213-47-4;		C05345	HMDB00124
glucose-6-phosphate (G6P)	519	Carbohydrate	Glycolysis, gluconeogenesis, pyruvate metabolism	31260	GC/MS	2043	387	103192-55-8;		C00668	HMDB01401
Isobar: fructose 1,6-diphosphate, glucose 1,6-diphosphate, myo-inositol 1,4 or 1,3-diphosphate	527	Carbohydrate	Glycolysis, gluconeogenesis, pyruvate metabolism	36984	LC/MS Neg	572	339
fructose 1-phosphate	525	Carbohydrate	Glycolysis, gluconeogenesis, pyruvate metabolism	15909	GC/MS	1983	445	53823-70-4;	65246	C01094	HMDB01076
methionine	225	Amino acid	Cysteine, methionine, SAM, taurine metabolism	1302	LC/MS Pos	1252	150	63-68-3;	69920876137	C00073	HMDB00696
methionine sulfoxide	219	Amino acid	Cysteine, methionine, SAM, taurine metabolism	18374	LC/MS Pos	729	166	3226-65-1;	1589800000000	C02989	HMDB02005
glucose 1-phosphate	520	Carbohydrate	Glycolysis, gluconeogenesis, pyruvate metabolism	33755	GC/MS	1853	217	56401-20-8;	65533	C00103	HMDB01586
1-oleoylglycerol (1-monoolein)	974	Lipid	Monoacylglycerol	21184	GC/MS	2181	397	111-03-5;	5283468		HMDB11567
2-hydroxybutyrate (AHB)	229	Amino acid	Cysteine, methionine, SAM, taurine metabolism	21044	GC/MS	1169	131	3347-90-8;	440864	C05984	HMDB00008
urea	245	Amino acid	Urea cycle; arginine-, proline-, metabolism	1670	GC/MS	1224	171	57-13-6;	117616000000	C00086	HMDB00294
eicosenoate (20:1n9 or 11)	653	Lipid	Long chain fatty acid	33587	LC/MS Neg	5955	309				HMDB02231
maltose	482	Carbohydrate	Fructose, mannose, galactose, starch, and sucrose metabolism	15806	GC/MS	2142	204	6363-53-7;	439341	C00208	HMDB00163
carnitine	820	Lipid	Carnitine metabolism	15500	LC/MS Pos	702	162	461-05-2;	10917
succinylcarnitine	591	Energy	Krebs cycle	37058	LC/MS Pos	1401	262
isovalerylcarnitine	205	Amino acid	Valine, leucine and isoleucine metabolism	34407	LC/MS Pos	2533	246		6426851		HMDB00688
2-methylbutyroylcarnitine	202	Amino acid	Valine, leucine and isoleucine metabolism	35431	LC/MS Pos	2439	246	31023-25-3;	6426901		HMDB00378
isobutyrylcarnitine	200	Amino acid	Valine, leucine and isoleucine metabolism	33441	LC/MS Pos	1941	232	25518-49-4;
lactate	536	Carbohydrate	Glycolysis, gluconeogenesis, pyruvate metabolism	527	GC/MS	1103	117	79-33-4;	612	C00186	HMDB00190
palmitoyl sphingomyelin	1004	Lipid	Sphingolipid	37506	GC/MS	2524	311		9939941
7-alpha-hydroxycholesterol	1023	Lipid	Sterol/Steroid	35692	GC/MS	2300	456	566-27-8;	107722	C03594	HMDB01496
phosphopantetheine	1244	Cofactors and vitamins	Pantothenate and CoA metabolism	15504	LC/MS Neg	1624	357	NA;	115254	C01134	HMDB01416
tyrosine	99	Amino acid	Phenylalanine & tyrosine metabolism	1299	LC/MS Pos	1516	182	60-18-4;	60576942100	C00082	HMDB00158
tryptophan	145	Amino acid	Tryptophan metabolism	54	LC/MS Pos	2445	205	73-22-3;	69235166305	C00078	HMDB00929
glucose	521	Carbohydrate	Glycolysis, gluconeogenesis, pyruvate metabolism	20488	GC/MS	1867	217	50-99-7;	79025	C00293	HMDB00122
10-heptadecenoate (17:1n7)	636	Lipid	Long chain fatty acid	33971	LC/MS Neg	5558	267	29743-97-3;	5312435
palmitoleate (16:1n7)	633	Lipid	Long chain fatty acid	33447	LC/MS Neg	5477	253	373-49-9;	445638	C08362	HMDB03229
linoleate (18:2n6)	604	Lipid	Essential fatty acid	1105	LC/MS Neg	5533	279	60-33-3;	5280450	C01595	HMDB00673
linolenate [alpha or gamma; (18:3n3 or 6)]	608	Lipid	Essential fatty acid	34035	LC/MS Neg	5450	277			C06427	HMDB01388
glycerate	517	Carbohydrate	Glycolysis, gluconeogenesis, pyruvate metabolism	1572	GC/MS	1361	189	600-19-1;	752	C00258	HMDB00139
cis-vaccenate (18:1n7)	641	Lipid	Long chain fatty acid	33970	GC/MS	1987	339	693-72-1;	5282761	C08367
isoleucylglycine	366	Peptide	Dipeptide	40008	LC/MS Pos	1732	189	868-28-0;	342532
ornithine	244	Amino acid	Urea cycle; arginine-, proline-, metabolism	1493	GC/MS	1764	142	3184-13-2;	6262	C00077	HMDB03374
scyllo-inositol	898	Lipid	Inositol metabolism	32379	GC/MS	1894	318	488-59-5;		C06153	HMDB06088
3-dehydrocarnitine*	821	Lipid	Carnitine metabolism	32654	LC/MS Pos	1020	160	10457-99-5;	6991982	C02636	HMDB12154
2-phosphoglycerate	528	Carbohydrate	Glycolysis, gluconeogenesis, pyruvate metabolism	35629	GC/MS	1734	459	70195-25-4;		C00631	HMDB03391
3-phosphoglycerate	529	Carbohydrate	Glycolysis, gluconeogenesis, pyruvate metabolism	40264	GC/MS	1756	357	80731-10-8;		C00597	HMDB00807
phosphoenolpyruvate (PEP)	534	Carbohydrate	Glycolysis, gluconeogenesis, pyruvate metabolism	597	GC/MS	1595	369	10526-80-4;	1005	C00074	HMDB00263
oleate (18:1n9)	639	Lipid	Long chain fatty acid	1359	GC/MS	1984	339	112-80-1;	445639	C00712	HMDB00207
stachydrine	1584	Xenobiotics	Food component/Plant	34384	LC/MS Pos	860	144	4136-37-2;	115244	C10172	HMDB04827
phosphate	602	Energy	Oxidative phosphorylation	11438	GC/MS	1308	299	7664-38-2 ;	1061	C00009	HMDB01429
glycerol	880	Lipid	Glycerolipid metabolism	15122	GC/MS	1311	205	56-81-5;	753	C00116	HMDB00131
myo-inositol	890	Lipid	Inositol metabolism	19934	GC/MS	1925	217	87-89-8;		C00137	HMDB00211
4-hydroxybutyrate (GHB)	692	Lipid	Fatty acid, monohydroxy	34585	GC/MS	1277	233	502-85-2;	10413	C00989	HMDB00710
uracil	1178	Nucleotide	Pyrimidine metabolism, uracil containing	605	GC/MS	1370	241	66-22-8;	1174	C00106	HMDB00300
hexanoylcarnitine	823	Lipid	Carnitine metabolism	32328	LC/MS Pos	3174	260	6920-35-0;	6426853	C01585	HMDB00705
anserine	399	Peptide	Dipeptide derivative	15747	LC/MS Neg	1126	239	10030-52-1;	6992110000000	C01262	HMDB00194
taurine	222	Amino acid	Cysteine, methionine, SAM, taurine metabolism	32975	LC/MS Pos	687	126	107-35-7;	11234068592	C00245	HMDB00251
lysine	69	Amino acid	Lysine metabolism	1301	GC/MS	1837	317	56-87-1;	5962	C00047	HMDB00182
3-(4-hydroxyphenyl)lactate	100	Amino acid	Phenylalanine & tyrosine metabolism	32197	LC/MS Neg	1395	181	6482-98-0;	9378	C03672	HMDB00755
2-linoleoylglycerol (2-monolinolein)	977	Lipid	Monoacylglycerol	32536	GC/MS	2169	408	3443-82-1;	5365676		HMDB11538
arginine	241	Amino acid	Urea cycle; arginine-, proline-, metabolism	1638	LC/MS Pos	650	175	1119-34-2;	5246487232	C00062	HMDB00517
butyrylcarnitine	811	Lipid	Fatty acid metabolism (also BCAA metabolism)	32412	LC/MS Pos	2007	232	25576-40-3;	213144
hydroxyisovaleroyl carnitine	206	Amino acid	Valine, leucine and isoleucine metabolism	35433	LC/MS Pos	1683	262	99159-87-2;
S-adenosylhomocysteine (SAH)	224	Amino acid	Cysteine, methionine, SAM, taurine metabolism	39540	LC/MS Pos	1480	193	979-92-0;		C00021	HMDB00939
phosphoethanolamine	877	Lipid	Glycerolipid metabolism	1600	GC/MS	1738	299	1071-23-4;	52323241015	C00346	HMDB00224
gulono-1,4-lactone	1196	Cofactors and vitamins	Ascorbate and aldarate metabolism	33454	GC/MS	1862	333	1128-23-0;	608	C01040	HMDB03466
cytidine-3'-monophosphate (3'-CMP)	1158	Nucleotide	Pyrimidine metabolism, cytidine containing	2959	LC/MS Pos	1181	324	84-52-6;	256622	C05822
undecanoate (11:0)	623	Lipid	Medium chain fatty acid	12067	LC/MS Neg	5207	185	334-48-5;	8180		HMDB00947
glycylvaline	296	Peptide	Dipeptide	18357	LC/MS Pos	1572	175	1963-21-9;	27248100000000
catechol sulfate	1300	Xenobiotics	Benzoate metabolism	35320	LC/MS Neg	1928	189		3083879	C00090
2-hydroxyglutarate	714	Lipid	Fatty acid, dicarboxylate	37253	GC/MS	1576	247	40951-21-1;	43	C02630	HMDB00606
pantothenate	1243	Cofactors and vitamins	Pantothenate and CoA metabolism	1508	LC/MS Pos	2218	220	137-08-6;	6613	C00864	HMDB00210
acetylcarnitine	822	Lipid	Carnitine metabolism	32198	LC/MS Pos	1203	204	5080-50-2;	7045767	C02571	HMDB00201
propionylcarnitine	809	Lipid	Fatty acid metabolism (also BCAA metabolism)	32452	LC/MS Pos	1589	218	17298-37-2 ;	107738	C03017	HMDB00824
inosine	1099	Nucleotide	Purine metabolism, (hypo)xanthine/inosine containing	1123	LC/MS Neg	1630	267	58-63-9;
squalene	1019	Lipid	Sterol/Steroid	1518	GC/MS	2205	69	111-02-4;	638072	C00751	HMDB00256
guanosine	1128	Nucleotide	Purine metabolism, guanine containing	1573	LC/MS Neg	1675	282	118-00-3;	6802	C00387	HMDB00133
Metabolites not meeting QC requirements (metabolites with more than 50% missing values &/or Data points outside 4 times the standard deviation for each metabolite), and thus excluded from heatmap
alanyltyrosine	Peptide	Dipeptide	37098	#N/A
dimethylglycine	Amino acid	Glycine, serine and threonine metabolism	5086	#N/A
1-docosahexaenoylglycerophosphocholine*	Lipid	Lysolipid	33822	#N/A
threonylleucine	Peptide	Dipeptide	40051	#N/A
beta-hydroxypyruvate	Amino acid	Glycine, serine and threonine metabolism	15686	#N/A
spermine	Amino acid	Polyamine metabolism	603	#N/A
valerylcarnitine	Lipid	Fatty acid metabolism	34406	#N/A
phenylpropionylglycine	Amino acid	Phenylalanine & tyrosine metabolism	35434	#N/A
butyrylglycine	Lipid	Fatty acid metabolism (also BCAA metabolism)	31850	#N/A
p-cresol sulfate	Amino acid	Phenylalanine & tyrosine metabolism	36103	#N/A
equol sulfate	Xenobiotics	Food component/Plant	40478	#N/A
taurocholate	Lipid	Bile acid metabolism	18497	#N/A
isovalerylglycine	Amino acid	Valine, leucine and isoleucine metabolism	35107	#N/A
cinnamoylglycine	Xenobiotics	Food component/Plant	38637	#N/A

## Sheet: Fig.4A,B,D
Fig.4A	pmol TAG/mg tissue
	Ctrl		mKO
replicate	wt ZT0	wt ZT12	Bmal1ko ZT0	Bmal1ko ZT12
1	670.778	1268.82	352.018	880.783
2	450.738	1423.97	765.832	660.485
3	292.525	1628.34	225.776	634.241
4	591.784	643.182	703.548	417.773
5	535.543	860.712	144.906	433.417
avg	508.273	1165.01	438.416	605.34
sem	64.8009	181.303	125.763	84.9953
Fig.4B	Metabolomics data
PATHWAY SORTORDER	BIOCHEMICAL NAME	SUPER PATHWAY	SUB PATHWAY	COMP ID	PLATFORM	RI	MASS	CAS	PUBCHEM	KEGG	Group HMDB	BIOCHEMICAL NAME	avg. WT_ZT0	avg. WT_ZT4	avg. WT_ZT8	avg. WT_ZT12	avg. WT_ZT16	avg. WT_ZT20	avg. KO_ZT0	avg. KO_ZT4	avg. KO_ZT8	avg. KO_ZT12	avg. KO_ZT16	avg. KO_ZT20	SEM. WT_ZT0	SEM. WT_ZT4	SEM. WT_ZT8	SEM. WT_ZT12	SEM. WT_ZT16	SEM. WT_ZT20	SEM. KO_ZT0	SEM. KO_ZT4	SEM. KO_ZT8	SEM. KO_ZT12	SEM. KO_ZT16	SEM. KO_ZT20
926	1-myristoylglycerophosphocholine	Lipid	Lysolipid	35626	LC/MS Pos	5481	468.3	20559-16-4;	460604		HMDB10379	1-myristoylglycerophosphocholine	0.440354	1.03266	1.1325	0.39978	0.788349	0.984545	1.36755	2.34426	1.55362	1.43769	1.68146	1.44082	0.152122	0.313671	0.374659	0.165317	0.16071	0.159778	0.549918	0.617192	0.451307	0.365451	0.298573	0.398247
951	1-palmitoylglycerophosphoinositol*	Lipid	Lysolipid	35305	LC/MS Neg	5573	571.3					1-palmitoylglycerophosphoinositol*	0.585156	0.831357	0.628869	0.592904	0.672029	0.95311	1.65434	1.44508	2.01713	1.34707	1.43346	1.76706	0.0588278	0.2607	0.0847915	0.0940181	0.105721	0.0873094	0.186272	0.356231	0.231791	0.150638	0.28328	0.247048
909	1-palmitoylglycerophosphoethanolamine	Lipid	Lysolipid	35631	LC/MS Neg	5940	452.3		9547069		HMDB11503	1-palmitoylglycerophosphoethanolamine	0.595718	0.918776	0.616454	0.641801	0.580722	0.934273	1.33841	1.31461	1.74281	1.12823	1.34667	1.56107	0.0310837	0.234068	0.0483336	0.171261	0.0555807	0.126266	0.12508	0.308117	0.225655	0.0919199	0.238615	0.157188
Fig.4D	Metabolomics data
PATHWAY SORTORDER	BIOCHEMICAL NAME	SUPER PATHWAY	SUB PATHWAY	COMP ID	PLATFORM	RI	MASS	CAS	PUBCHEM	KEGG	Group HMDB	BIOCHEMICAL NAME	avg. WT_ZT0	avg. WT_ZT4	avg. WT_ZT8	avg. WT_ZT12	avg. WT_ZT16	avg. WT_ZT20	avg. KO_ZT0	avg. KO_ZT4	avg. KO_ZT8	avg. KO_ZT12	avg. KO_ZT16	avg. KO_ZT20	SEM. WT_ZT0	SEM. WT_ZT4	SEM. WT_ZT8	SEM. WT_ZT12	SEM. WT_ZT16	SEM. WT_ZT20	SEM. KO_ZT0	SEM. KO_ZT4	SEM. KO_ZT8	SEM. KO_ZT12	SEM. KO_ZT16	SEM. KO_ZT20
611	docosapentaenoate (n3 DPA; 22:5n3)	Lipid	Essential fatty acid	32504	LC/MS Neg	5574	329.4	2234-74-4 ;		C16513	HMDB01976	docosapentaenoate (n3 DPA; 22:5n3)	0.657926	0.904607	1.04813	0.827818	0.847087	1.01124	0.951923	0.97372	1.58393	1.47703	1.39588	1.16839	0.0855091	0.112516	0.21245	0.139135	0.106281	0.0570767	0.111276	0.0818038	0.189988	0.331262	0.238892	0.194984
613	docosahexaenoate (DHA; 22:6n3)	Lipid	Essential fatty acid	19323	LC/MS Neg	5518	327.3	6217-54-5;	445580	C06429	HMDB02183	docosahexaenoate (DHA; 22:6n3)	0.747302	0.971511	0.980629	0.770496	0.880777	1.05554	1.08378	0.998435	1.49555	1.28895	1.39256	1.16288	0.0698067	0.0988946	0.105444	0.107399	0.0585163	0.123678	0.0877938	0.0861298	0.132584	0.258517	0.180465	0.209235
659	arachidonate (20:4n6)	Lipid	Long chain fatty acid	1110	LC/MS Neg	5525	303.4	506-32-1;	444899	C00219	HMDB01043	arachidonate (20:4n6)	0.763399	0.863499	0.888213	0.862006	1.02696	1.32977	1.09694	1.00574	1.22492	1.37085	1.40352	1.25306	0.0596937	0.0807306	0.106236	0.180769	0.0975915	0.319489	0.110797	0.094012	0.102732	0.343158	0.13362	0.293391
604	linoleate (18:2n6)	Lipid	Essential fatty acid	1105	LC/MS Neg	5533	279.3	60-33-3;	5280450	C01595	HMDB00673	linoleate (18:2n6)	1.1227	1.03554	0.888279	0.625544	1.10232	1.34706	1.02191	0.900692	1.07707	0.911351	1.11368	1.12762	0.0946537	0.092142	0.0334077	0.138529	0.114149	0.226673	0.149152	0.0908555	0.106138	0.170745	0.121627	0.171986
608	linolenate [alpha or gamma; (18:3n3 or 6)]	Lipid	Essential fatty acid	34035	LC/MS Neg	5450	277.3			C06427	HMDB01388	linolenate [alpha or gamma; (18:3n3 or 6)]	1.27921	0.918265	0.825166	0.46075	1.12152	1.3847	1.16766	0.906164	0.978908	0.863768	1.11064	1.19216	0.116852	0.0863146	0.0518879	0.0927703	0.160858	0.213392	0.157178	0.0905859	0.145817	0.139938	0.173318	0.179807
710	13-HODE + 9-HODE	Lipid	Fatty acid, monohydroxy	37752	LC/MS Neg	5247	295.2					13-HODE + 9-HODE	1.20722	0.928286	0.991804	0.705465	1.0598	1.10191	1.06572	1.00125	1.12434	1.03234	1.13877	1.08561	0.0534328	0.0420609	0.0368648	0.120903	0.106868	0.184382	0.0865028	0.0768921	0.0849058	0.173919	0.121755	0.122911

## Sheet: Fig.5A,B,C,D,E
Fig.5A	Metabolomics data
PATHWAY SORTORDER	BIOCHEMICAL NAME	SUPER PATHWAY	SUB PATHWAY	COMP ID	PLATFORM	RI	MASS	CAS	PUBCHEM	KEGG	Group HMDB	BIOCHEMICAL NAME	avg. WT_ZT0	avg. WT_ZT4	avg. WT_ZT8	avg. WT_ZT12	avg. WT_ZT16	avg. WT_ZT20	avg. KO_ZT0	avg. KO_ZT4	avg. KO_ZT8	avg. KO_ZT12	avg. KO_ZT16	avg. KO_ZT20	SEM. WT_ZT0	SEM. WT_ZT4	SEM. WT_ZT8	SEM. WT_ZT12	SEM. WT_ZT16	SEM. WT_ZT20	SEM. KO_ZT0	SEM. KO_ZT4	SEM. KO_ZT8	SEM. KO_ZT12	SEM. KO_ZT16	SEM. KO_ZT20
27	alanine	Amino acid	Alanine and aspartate metabolism	1126	GC/MS	1147.6	115.9	56-41-7;	59507311724	C00041	HMDB00161	alanine	0.908609	0.906826	0.79229	0.863732	0.876479	0.998306	1.19991	1.05268	1.18141	1.36372	1.60513	1.44264	0.0315196	0.0715717	0.0636518	0.117038	0.117782	0.0417774	0.0952171	0.0730963	0.0756268	0.145752	0.111854	0.0663494
44	glutamine	Amino acid	Glutamate metabolism	53	LC/MS Pos	684	147.2	56-85-9;	69920865961	C00064	HMDB00641	glutamine	0.903051	1.02254	1.08603	0.926367	0.860153	0.916896	1.0512	1.1691	1.10053	1.02534	0.884093	1.0364	0.0272878	0.0323469	0.0258403	0.0325395	0.0200269	0.045391	0.0446492	0.0309173	0.0363906	0.0229266	0.073143	0.0267369
39	glutamate	Amino acid	Glutamate metabolism	57	LC/MS Pos	700	148.1	56-86-0;	611	C00025	HMDB03339	glutamate	0.825032	0.94573	0.874054	0.719192	0.840545	0.852976	1.54397	1.55461	1.45506	1.04269	1.24479	1.35296	0.0612468	0.136116	0.0803844	0.0659959	0.0936138	0.0642347	0.0870226	0.0987852	0.150598	0.0946376	0.0768048	0.089368
181	leucine	Amino acid	Valine, leucine and isoleucine metabolism	60	LC/MS Pos	1674	132.2	61-90-5;	70457986106	C00123	HMDB00687	leucine	0.955916	0.985329	0.882925	0.811559	0.857696	0.973062	1.08874	1.04882	0.981197	0.940854	1.15827	1.12742	0.0450181	0.0330212	0.0392044	0.121127	0.0339684	0.0584513	0.0717736	0.0275053	0.0477946	0.0719034	0.0416382	0.0375117
180	isoleucine	Amino acid	Valine, leucine and isoleucine metabolism	1125	LC/MS Pos	1614	132.1	73-32-5;	791	C00407	HMDB00172	isoleucine	0.934639	1.03414	0.883278	0.803613	0.853871	0.96353	1.11484	1.15885	1.02384	0.940612	1.13718	1.13878	0.0479248	0.0360798	0.0549198	0.122105	0.038451	0.0626048	0.0871568	0.0432299	0.0519779	0.0671127	0.0410338	0.06465
190	valine	Amino acid	Valine, leucine and isoleucine metabolism	1649	LC/MS Pos	1040	118.1	72-18-4;	69710186287	C00183	HMDB00883	valine	0.957968	0.973104	0.820426	0.806212	0.933577	1.01308	1.11159	1.05799	0.91962	0.925891	1.16389	1.13271	0.0298442	0.0464447	0.0470995	0.131801	0.0442992	0.0532334	0.0500383	0.0323085	0.0549328	0.0672513	0.0385687	0.0574987
1	glycine	Amino acid	Glycine, serine and threonine metabolism	11777	GC/MS	1166	101.9	56-40-6;	5257127750	C00037	HMDB00123	glycine	0.490282	0.639951	0.556912	0.657946	0.528099	0.611708	1.42999	1.42581	1.433	1.54621	1.4401	1.51407	0.0323091	0.116507	0.0544986	0.0768612	0.11599	0.0748903	0.112245	0.0681965	0.0883559	0.134809	0.143551	0.110252
8	serine	Amino acid	Glycine, serine and threonine metabolism	1648	GC/MS	1389.1	204	56-45-1;	59516857581	C00065	HMDB03406	serine	0.693351	0.772877	0.830804	0.858213	0.690935	0.868682	1.21357	1.06211	1.28045	1.27589	1.25815	1.31953	0.0453463	0.0742866	0.0823884	0.114361	0.115783	0.083815	0.134952	0.0464597	0.0664668	0.0963145	0.111161	0.0737159
17	threonine	Amino acid	Glycine, serine and threonine metabolism	1284	LC/MS Pos	713	120.1	72-19-5;	69710196288	C00188	HMDB00167	threonine	0.933454	0.920134	0.791152	0.876227	0.939214	1.04079	1.17221	1.03332	1.01911	1.08101	1.20098	1.25376	0.0248186	0.0471336	0.0350802	0.0334574	0.0508883	0.0709774	0.0905429	0.0266686	0.0220926	0.0430634	0.0662345	0.0277314
225	methionine	Amino acid	Cysteine, methionine, SAM, taurine metabolism	1302	LC/MS Pos	1252	150.1	63-68-3;	69920876137	C00073	HMDB00696	methionine	1.04012	0.880205	0.771289	0.856512	1.03191	1.04218	1.07448	0.904374	0.988005	1.00453	1.19584	1.17419	0.0570768	0.03909	0.0344457	0.0491072	0.0685864	0.0344405	0.0544855	0.0454054	0.0483361	0.074337	0.0575601	0.0456972
246	proline	Amino acid	Urea cycle; arginine-, proline-, metabolism	1898	LC/MS Pos	796	116.1	147-85-3;	1457426971047	C00148	HMDB00162	proline	0.871869	0.756773	0.668589	0.785401	0.969599	0.985351	1.32106	1.06409	0.981031	1.02267	1.39675	1.30209	0.0349776	0.0814445	0.0205041	0.0969502	0.115373	0.0672627	0.0877359	0.037335	0.027935	0.0739896	0.121316	0.0598282
24	aspartate	Amino acid	Alanine and aspartate metabolism	15996	GC/MS	1529.7	232	56-84-8;	5960	C00049	HMDB00191	aspartate	0.783626	1.0971	0.803148	0.753887	0.628617	1.19894	1.67398	1.08443	1.27403	1.17017	1.39536	1.22429	0.133899	0.123598	0.194657	0.0659058	0.186674	0.175852	0.216541	0.209503	0.276617	0.165876	0.249998	0.2066
Fig.5B	Metabolomics data
PATHWAY SORTORDER	BIOCHEMICAL NAME	SUPER PATHWAY	SUB PATHWAY	COMP ID	PLATFORM	RI	MASS	CAS	PUBCHEM	KEGG	Group HMDB	BIOCHEMICAL NAME	avg. WT_ZT0	avg. WT_ZT4	avg. WT_ZT8	avg. WT_ZT12	avg. WT_ZT16	avg. WT_ZT20	avg. KO_ZT0	avg. KO_ZT4	avg. KO_ZT8	avg. KO_ZT12	avg. KO_ZT16	avg. KO_ZT20	SEM. WT_ZT0	SEM. WT_ZT4	SEM. WT_ZT8	SEM. WT_ZT12	SEM. WT_ZT16	SEM. WT_ZT20	SEM. KO_ZT0	SEM. KO_ZT4	SEM. KO_ZT8	SEM. KO_ZT12	SEM. KO_ZT16	SEM. KO_ZT20
241	arginine	Amino acid	Urea cycle; arginine-, proline-, metabolism	1638	LC/MS Pos	650	175.2	1119-34-2;	5246487232	C00062	HMDB00517	arginine	1.91019	1.30738	1.06018	1.09462	1.10113	1.42207	0.941832	0.968576	0.961311	0.855833	0.731067	0.833531	0.113394	0.208173	0.0400496	0.114505	0.0666872	0.116348	0.0988931	0.0146954	0.155354	0.0837273	0.0975415	0.0510068
69	lysine	Amino acid	Lysine metabolism	1301	GC/MS	1836.7	317.2	56-87-1;	5962	C00047	HMDB00182	lysine	2.06153	1.94817	1.61896	1.52704	0.78269	1.55583	1.00299	0.830049	0.986503	0.739846	0.496508	0.639272	0.352366	0.356773	0.414202	0.273677	0.199769	0.273822	0.256316	0.146224	0.380089	0.224826	0.0442334	0.0843572
Fig.5C	Metabolomics data
PATHWAY SORTORDER	BIOCHEMICAL NAME	SUPER PATHWAY	SUB PATHWAY	COMP ID	PLATFORM	RI	MASS	CAS	PUBCHEM	KEGG	Group HMDB	BIOCHEMICAL NAME	avg. WT_ZT0	avg. WT_ZT4	avg. WT_ZT8	avg. WT_ZT12	avg. WT_ZT16	avg. WT_ZT20	avg. KO_ZT0	avg. KO_ZT4	avg. KO_ZT8	avg. KO_ZT12	avg. KO_ZT16	avg. KO_ZT20	SEM. WT_ZT0	SEM. WT_ZT4	SEM. WT_ZT8	SEM. WT_ZT12	SEM. WT_ZT16	SEM. WT_ZT20	SEM. KO_ZT0	SEM. KO_ZT4	SEM. KO_ZT8	SEM. KO_ZT12	SEM. KO_ZT16	SEM. KO_ZT20
579	citrate	Energy	Krebs cycle	1564	GC/MS	1763.4	273.1	77-92-9;	311	C00158	HMDB00094	citrate	0.709011	0.893593	1.29247	1.23741	0.631273	0.791419	1.06757	1.10183	1.26502	1.33114	1.58486	1.23857	0.10949	0.073606	0.150008	0.397967	0.109414	0.052689	0.0450735	0.0853109	0.104778	0.132834	0.19301	0.176046
594	fumarate	Energy	Krebs cycle	1643	GC/MS	1382.1	245	100-17-8;		C00122	HMDB00134	fumarate	0.971156	1.01639	0.95907	0.928288	0.856792	1.12968	0.921324	0.850158	1.01423	1.04581	1.39028	1.21547	0.125032	0.109223	0.122071	0.247808	0.0972787	0.122171	0.0808077	0.0483521	0.1341	0.13375	0.22259	0.122194
598	malate	Energy	Krebs cycle	1303	GC/MS	1502	233	6915-15-7;	525	C00149	HMDB00156	malate	1.07586	0.937614	0.87848	0.89297	0.879294	0.972156	0.896526	0.924482	0.862879	1.02078	1.33896	1.21378	0.0730221	0.053443	0.0951328	0.219982	0.12141	0.0389241	0.126417	0.12177	0.0899166	0.138104	0.142567	0.0717891
Fig.5D	Serum amino acids, ad libitum fed
Ad libitum fed
			ALA										GLY
			umol/L	Ctrl									umol/L	Ctrl
ID	genotype	timepoint	CONC	AVG	SEM	ZT				ID	genotype	timepoint	CONC	AVG	SEM	ZT
BM3 31	Ctrl	ZT 0	639	610.667	14.9926	0				BM3 31	Ctrl	ZT 0	707.907	617.085	55.1135	0
BM3 36	Ctrl	ZT 0	588	739.667	169.319	4				BM3 36	Ctrl	ZT 0	517.581	773.181	161.999	4
BM3 38	Ctrl	ZT 0	605	632.667	233.467	8				BM3 38	Ctrl	ZT 0	625.768	893.562	326.978	8
BM3 24	Ctrl	ZT 4	417	626	71.1266	12				BM3 24	Ctrl	ZT 4	466.645	816.219	51.5777	12
BM3 27	Ctrl	ZT 4	812	622.667	76.4729	16				BM3 27	Ctrl	ZT 4	835.578	556.391	53.9093	16
BM3 28	Ctrl	ZT 4	990	642.333	96.5614	20				BM3 28	Ctrl	ZT 4	1017.32	584.178	63.1466	20
BM3 15	Ctrl	ZT 8	379							BM3 15	Ctrl	ZT 8	510.568
BM3 22	Ctrl	ZT 8	420							BM3 22	Ctrl	ZT 8	626.006
BM2* 17	Ctrl	ZT 8	1099							BM2* 17	Ctrl	ZT 8	1544.11
BM2 72	Ctrl	ZT 12	507							BM2 72	Ctrl	ZT 12	746.937
BM2 88	Ctrl	ZT 12	753							BM2 88	Ctrl	ZT 12	917.048
BM2* 31	Ctrl	ZT 12	618							BM2* 31	Ctrl	ZT 12	784.673
BM3 56	Ctrl	ZT 16	761							BM3 56	Ctrl	ZT 16	639.239
BM2* 29	Ctrl	ZT 16	610							BM2* 29	Ctrl	ZT 16	574.722
BM2* 34	Ctrl	ZT 16	497							BM2* 34	Ctrl	ZT 16	455.211
BM3 39	Ctrl	ZT 20	567							BM3 39	Ctrl	ZT 20	512.402
BM3 40	Ctrl	ZT 20	834							BM3 40	Ctrl	ZT 20	710.058
BM3 42	Ctrl	ZT 20	526	mKO						BM3 42	Ctrl	ZT 20	530.073	mKO
				AVG	SEM	ZT								AVG	SEM	ZT
BM3 12	mKO	ZT 0	749	645.75	69.9921	0				BM3 12	mKO	ZT 0	937.541	770.621	87.5149	0
BM3 13	mKO	ZT 0	439	758	164.564	4				BM3 13	mKO	ZT 0	526.563	1068.39	98.0429	4
BM3 33	mKO	ZT 0	694	594	116.144	8				BM3 33	mKO	ZT 0	781.766	745.18	179.975	8
BM3 37	mKO	ZT 0	701	782	168.858	12				BM3 37	mKO	ZT 0	836.616	1148.65	299.562	12
BM3 3	mKO	ZT 4	538	1095.67	223.062	16				BM3 3	mKO	ZT 4	920.937	1101.34	240.529	16
BM3 7	mKO	ZT 4	656	1091.33	255.62	20				BM3 7	mKO	ZT 4	1030.19	1176.72	86.0085	20
BM3 8	mKO	ZT 4	1080							BM3 8	mKO	ZT 4	1254.06
BM3 14	mKO	ZT 8	468							BM3 14	mKO	ZT 8	649.349
BM3 23	mKO	ZT 8	826							BM3 23	mKO	ZT 8	1093.57
BM2* 21	mKO	ZT 8	488							BM2* 21	mKO	ZT 8	492.621
BM2 87	mKO	ZT 12	1024							BM2 87	mKO	ZT 12	1576.84
BM2* 24	mKO	ZT 12	865							BM2* 24	mKO	ZT 12	1297.46
BM2* 33	mKO	ZT 12	457							BM2* 33	mKO	ZT 12	571.647
BM3 50	mKO	ZT 16	958							BM3 50	mKO	ZT 16	834.731
BM3 51	mKO	ZT 16	797							BM3 51	mKO	ZT 16	887.87
BM3 52	mKO	ZT 16	1532							BM3 52	mKO	ZT 16	1581.42
BM2 95	mKO	ZT 20	1053							BM2 95	mKO	ZT 20	1020.63
BM2 100	mKO	ZT 20	1552							BM2 100	mKO	ZT 20	1317.37
BM2 103	mKO	ZT 20	669							BM2 103	mKO	ZT 20	1192.17
Fig.5E	Serum amino acids, fasted 6hr, collected ZT8
					urea	urea	glutamine	glutamate	alanine	glycine	leucine	phenylalanine	tyrosine	threonine	serine	proline	methionine
					UREA	UREA	GLU	AC GLU	ALA	GLY	LEU	PHE	TYR	THR	SER	PRO	MET
	mouse	Genotype	ZT	ID	umol/L	mg/dL	micromol/L	micromol/L	micromol/L	micromol/L	micromol/L	micromol/L	micromol/L	micromol/L	micromol/L	micromol/L	micromol/L
	BM4 110	Ctrl	ZT8	BM4 110	5681.45	34.0887	643.893	319.236	340.474	449.251	116.138	55.9672	50.9025	141.753	130.698	82.165	57.099
	BM4 105	Ctrl	ZT8	BM4 105	6249.93	37.4996	762.818	377.816	431.933	463.579	162.291	72.0608	64.4201	153.364	149.489	89.0673	58.0154
	BM4 101	Ctrl	ZT8	BM4 101	4520.95	27.1257	708.113	289.09	338.175	306.045	90.8789	47.7925	47.3026	84.9824	84.992	73.9169	27.6249
	BM4 106	Ctrl	ZT8	BM4 106	6190.14	37.1409	622.206	245.917	329.106	301.555	135.848	73.1655	56.6222	125.189	103.641	75.3379	46.5609
		Ctrl	ZT8	avg	5660.62	33.9637	684.258	308.015	359.922	380.107	126.289	62.2465	54.8119	126.322	117.205	80.1218	47.325
				sem	400.724	2.40434	31.912	27.7075	24.1288	44.1625	15.123	6.21754	3.7335	14.9434	14.277	3.4831	7.06217
					UREA	UREA	GLU	AC GLU	ALA	GLY	LEU	PHE	TYR	THR	SER	PRO	MET
	mouse	Genotype	ZT	ID	umol/L	mg/dL	micromol/L	micromol/L	micromol/L	micromol/L	micromol/L	micromol/L	micromol/L	micromol/L	micromol/L	micromol/L	micromol/L
	BM4 77	mKO	ZT8	BM4 77	6329.57	37.9774	680.822	301.574	421.174	487.936	106.161	53.587	60.9602	131.072	137.548	73.112	47.3454
	BM4 122	mKO	ZT8	BM4 122	7821.38	46.9283	888.247	524.892	560.435	582.655	235.843	106.626	104.86	219.785	218.854	135.963	118.908
	BM4 100	mKO	ZT8	BM4 100	4703	28.218	760.784	433.959	510.982	531.152	119.293	59.9198	53.9264	126.348	138.037	93.2333	41.4835
		mKO	ZT8	avg	6284.65	37.7079	776.617	420.142	497.53	533.915	153.766	73.3774	73.2488	159.068	164.813	100.77	69.2456
				sem	900.477	5.40286	60.3995	64.8353	40.76	27.3777	41.2134	16.7243	15.9354	30.3889	27.021	18.5308	24.8887
			t.test	p=	n.s.	n.s.	n.s.	n.s.	0.027	0.043	n.s.	n.s.	n.s.	n.s.	n.s.	n.s.	n.s.

## Sheet: Fig.6A,B,C,D,E,F,G
Fig.6A	Metabolomics data
PATHWAY SORTORDER	BIOCHEMICAL NAME	SUPER PATHWAY	SUB PATHWAY	COMP ID	PLATFORM	RI	MASS	CAS	PUBCHEM	KEGG	Group HMDB	BIOCHEMICAL NAME	avg. WT_ZT0	avg. WT_ZT4	avg. WT_ZT8	avg. WT_ZT12	avg. WT_ZT16	avg. WT_ZT20	avg. KO_ZT0	avg. KO_ZT4	avg. KO_ZT8	avg. KO_ZT12	avg. KO_ZT16	avg. KO_ZT20	SEM. WT_ZT0	SEM. WT_ZT4	SEM. WT_ZT8	SEM. WT_ZT12	SEM. WT_ZT16	SEM. WT_ZT20	SEM. KO_ZT0	SEM. KO_ZT4	SEM. KO_ZT8	SEM. KO_ZT12	SEM. KO_ZT16	SEM. KO_ZT20
835	oleoylcarnitine	Lipid	Carnitine metabolism	35160	LC/MS Pos	5202	426.4				HMDB05065	oleoylcarnitine	1.11731	6.34946	4.43888	0.993241	0.722691	1.04689	0.90018	3.17792	2.87222	1.56171	0.377984	0.553248	0.435079	1.80031	2.41894	0.526784	0.175822	0.128671	0.573422	1.31019	1.22923	0.535177	0.110683	0.131814
833	palmitoylcarnitine	Lipid	Carnitine metabolism	22189	LC/MS Pos	5179	400.4	6865-14-1;	461			palmitoylcarnitine	0.941586	5.66786	3.82227	0.933565	0.716432	1.04107	1.62426	4.03294	3.95362	1.9725	0.449938	0.925846	0.324662	1.43702	2.13063	0.499657	0.240717	0.198812	1.06716	1.34427	1.79551	0.567997	0.0793912	0.252021
831	myristoylcarnitine	Lipid	Carnitine metabolism	33952	LC/MS Pos	5113	372.4	18822-89-4;	6426854			myristoylcarnitine	0.636789	3.08278	2.27049	0.533205	0.511976	0.698195	1.35592	1.95411	2.04572	1.53773	0.440346	0.603749	0.176664	0.853924	0.901708	0.147985	0.135462	0.146875	0.694321	0.516042	0.81643	0.408408	0.112179	0.169381
813	valerylcarnitine	Lipid	Fatty acid metabolism	34406	LC/MS Pos	2584	246.2		6426903		HMDB13128	valerylcarnitine	1.15104	0.886009	0.950362	0.995753	1.35126	1.24175	0.677724	0.681821	0.677724	0.810052	0.732133	0.815005	0.201926	0.108889	0.0938042	0.300015	0.223916	0.346914	0	0.0040974	0	0.07326	0.054409	0.137281
811	butyrylcarnitine	Lipid	Fatty acid metabolism (also BCAA metabolism)	32412	LC/MS Pos	2007	232.2	25576-40-3;	213144			butyrylcarnitine	1.86972	1.55625	1.35331	1.44251	1.30876	1.90191	0.871155	0.786844	0.98388	0.915162	0.441914	0.744204	0.168104	0.213465	0.19395	0.325575	0.119668	0.396425	0.0896301	0.0711947	0.131642	0.244357	0.0835565	0.13246
822	acetylcarnitine	Lipid	Carnitine metabolism	32198	LC/MS Pos	1203	204.2	5080-50-2;	7045767	C02571	HMDB00201	acetylcarnitine	1.41265	1.30172	1.95654	2.00074	2.19007	1.87982	0.754163	0.732046	0.96506	0.851908	0.761796	0.726877	0.219794	0.329601	0.462995	0.667335	0.358479	0.491844	0.189694	0.129901	0.255215	0.197515	0.0762791	0.165252
	Fig6B	palmitate oxidation rate				Fig6C	Citrate synthase activity							Fig6D	Respiratory Complex Activity Assays
			nmol/hr/g					vastus lateralis							2012-08-23
	ID	geno	gastrocnemius			Mouse	genotype	sample ID	ATT		Ctrl	mkO			Complex I/CS			% control			Complex II/CS			normalized for control avg			Total Avg	SEM		Complex III/CS			normalized for control avg			Total Avg	SEM		Complex II+III/CS			normalized for control avg			Total Avg	SEM		Complex IV/CS
	BM3* 47	WT	2832.74			BM3 12	ko	V1	945.56	avg	463.621	433.071				ID	CI/CS	CI/CS			geno	ID	deltaCII/CS	deltaCII/CS		Ctrl	0.714299	0.0302175		geno	ID	CIII/CS	CIII/CS		Ctrl	0.288222	0.016668		geno	ID	CII+III/CS	CII+III/CS		Ctrl	0.477761	0.0159242		geno	ID
	BM3* 62	WT	2968.39			BM3 31	wt	V2	398.042	sem	50.5007	64.45			KO	V1	0.147469	130.605			KO	V1	0.651922	91.2674		mKO	0.684785	0.0209253		KO	V1	0.325	112.76		mKO	0.259	0.011846		KO	V1	0.359136	75.1707		mKO	0.375213	0.0109498		KO	V1
	BM3* 66	WT	2159.35			BM3 3	ko	V3	369.656						KO	V13	0.0792489	70.1862			KO	V13	0.649796	90.9697						KO	V13	0.267	92.6369						KO	V13	0.433027	90.6367						KO	V13
	BM4 48	WT	3432.85			BM3 24	wt	V4	638.201						KO	V25	0.207919	184.142			KO	V25	0.677176	94.8028						KO	V25	0.216	74.9422						KO	V25	0.360568	75.4705						KO	V25
	BM4 50	WT	2939.53			BM3 14	ko	V5	1187.61						KO	V7	0.0996008	88.2107			KO	V3	0.678492	94.9871			deltaCII/CS	deltaCII/CS		KO	V3	0.303	105.127						KO	V3	0.329268	68.9191						KO	V3
	BM4 51	WT	3248.52			BM3 15	wt	V6	1009.55						KO	V19	0.0720656	63.8244			KO	V15	0.796209	111.467			% control	% control		KO	V15	0.288	99.9229			CIII/CS	CIII/CS		KO	V15	0.408768	85.5591			CII+III/CS	CII+III/CS		KO	V15
	BM4 96	WT	3950.58			BM2 87	ko	V7	686.812						KO	V31	0.135848	120.313			KO	V27	0.62477	87.4661			Ctrl	mKO		KO	V27	0.27	93.6777			% control	% control		KO	V27	0.369245	77.2866			% control	% control		KO	V27
	BM3 81	WT	3203.49			BM2 72	wt	V8	382.842												KO	V5	0.624194	87.3855		Avg	100	95.8681		KO	V5	0.262	90.9021			Ctrl	mKO		KO	V5	0.359879	75.3261			Ctrl	mKO		KO	V5
	BM3 88	WT	2765.63			BM3 50	ko	V9	727.996									% control			KO	V17	0.764912	107.086		SEM	4.23037	2.92949		KO	V17	0.296	102.699		Avg	100	89.8612		KO	V17	0.353947	74.0846		Avg	100	78.5356		KO	V17
	BM3 110	WT	3115.15			BM3 56	wt	V10	844.73							ID	CI/CS	CI/CS			KO	V29	0.58253	81.5527						KO	V29	0.253	87.7795		SEM	5.78302	4.11001		KO	V29	0.393976	82.463		SEM	3.33309	2.2919		KO	V29
	BM3* 1	WT	3781.96			BM2 95	ko	V11	417.166						WT	V2	0.0969524	85.8652			KO	V7	0.519818	72.7731						KO	V7	0.288	99.9229						KO	V7	0.297039	62.1731						KO	V7
	BM3* 4	WT	4561.04			BM3 39	wt	V12	741.674						WT	V14	0.0844672	74.8078			KO	V19	0.751064	105.147						KO	V19	0.196	68.0031						KO	V19	0.451773	94.5605						KO	V19
		avg	3246.6			BM3 13	ko	V13	309.788						WT	V26	0.167282	148.152			KO	V31	0.786325	110.083						KO	V31	0.228	79.1056						KO	V31	0.393773	82.4205						KO	V31
		sem	180.911			BM3 36	wt	V14	367.933						WT	V8	0.107694	95.3781			KO	V9	0.833646	116.708						KO	V9	0.383	132.884						KO	V9	0.465291	97.3899						KO	V9
						BM3 7	ko	V15	265.135						WT	V20	0.0998884	88.4654			KO	V21	0.659283	92.2979						KO	V21	0.196	68.0031						KO	V21	0.352848	73.8545						KO	V21
	ID	geno	gastrocnemius			BM3 27	wt	V16	346.553						WT	V32	0.121191	107.332			KO	V33	0.661034	92.5431						KO	V33	0.211	73.2074						KO	V33	0.306708	64.1969						KO	V33
	BM3* 56	KO	3277.25			BM3 23	ko	V17	332.947												KO	V11	0.716781	100.348						KO	V11	0.196	68.0031						KO	V11	0.355214	74.3498						KO	V11
	BM3* 57	KO	3512.51			BM3 22	wt	V18	332.034												KO	V23	0.793416	111.076						KO	V23	0.228	79.1056						KO	V23	0.346658	72.5588						KO	V23
	BM3* 68	KO	2833.87			BM2* 24	ko	V19	227.826												KO	V35	0.554763	77.6654						KO	V35	0.256	88.8204						KO	V35	0.416709	87.2213						KO	V35
	BM4 3	KO	3794.29			BM2 88	wt	V20	329.346									CI/CS	CI/CS		WT	V2	0.625493	87.5674						WT	V2	0.349	121.087						WT	V2	0.48382	101.268						WT	V2
	BM4 4	KO	3508.55			BM3 51	ko	V21	296.302									% control	% control		WT	V14	0.783175	109.642						WT	V14	0.296	102.699						WT	V14	0.542654	113.583						WT	V14
	BM4 5	KO	4155.31			BM2* 29	wt	V22	327.533							Ctrl	mKO	Ctrl	mKO		WT	V26	0.840801	117.71						WT	V26	0.283	98.1881						WT	V26	0.472852	98.9725						WT	V26
	BM4 6	KO	4106.87			BM2 100	ko	V23	403.18						Avg	0.112912	0.123692	100	109.547		WT	V4	0.579657	81.1504						WT	V4	0.36	124.904						WT	V4	0.5	104.655						WT	V4
	BM4 98	KO	5029.49			BM3 40	wt	V24	297.318						SEM	0.0119516	0.0208392	10.5849	18.4561		WT	V16	0.575802	80.6107						WT	V16	0.228	79.1056						WT	V16	0.40379	84.5172						WT	V16
	BM3 93	KO	4323.03			BM3 33	ko	V25	275.219												WT	V28	0.533748	74.7233						WT	V28	0.345	119.699						WT	V28	0.433393	90.7133						WT	V28
	BM3 83	KO	4214.59			BM3 38	wt	V26	378.329												WT	V6	0.767877	107.501						WT	V6	0.311	107.903						WT	V6	0.526403	110.181						WT	V6
	BM3* 6	KO	4311.49			BM3 8	ko	V27	300.016												WT	V18	0.836538	117.113						WT	V18	0.293	101.658						WT	V18	0.588757	123.233						WT	V18
	BM3* 7	KO	4130			BM3 28	wt	V28	224.383												WT	V30	0.621579	87.0195						WT	V30	0.284	98.5351						WT	V30	0.410477	85.9168						WT	V30
	BM3* 8	KO	4421.36			BM2* 21	ko	V29	276.321												WT	V8	0.900886	126.122						WT	V8	0.429	148.843						WT	V8	0.615172	128.761						WT	V8
		avg	3970.66			BM2* 17	wt	V30	315.656												WT	V20	0.619828	86.7743						WT	V20	0.28	97.1473						WT	V20	0.505855	105.88						WT	V20
		sem	158.717			BM2* 33	ko	V31	290.384												WT	V32	0.736082	103.049						WT	V32	0.216	74.9422						WT	V32	0.368041	77.0345						WT	V32
						BM2* 31	wt	V32	601.653												WT	V10	0.792353	110.927						WT	V10	0.212	73.5544						WT	V10	0.509412	106.625						WT	V10
						BM3 52	ko	V33	180.541												WT	V22	0.682256	95.514						WT	V22	0.257	89.1673						WT	V22	0.387895	81.1903						WT	V22
						BM2* 34	wt	V34	375.444												WT	V34	0.798191	111.745						WT	V34	0.235	81.5343						WT	V34	0.4693	98.2291						WT	V34
						BM2 103	ko	V35	302.813												WT	V12	0.972534	136.152						WT	V12	0.418	145.027						WT	V12	0.513733	107.529						WT	V12
						BM3 42	wt	V36	433.952												WT	V24	0.618454	86.5819						WT	V24	0.189	65.5744						WT	V24	0.42394	88.7348						WT	V24
																					WT	V36	0.572128	80.0965						WT	V36	0.203	70.4318						WT	V36	0.444203	92.9759						WT	V36
Fig.6F	Metabolomics data
PATHWAY SORTORDER	BIOCHEMICAL NAME	SUPER PATHWAY	SUB PATHWAY	COMP ID	PLATFORM	RI	MASS	CAS	PUBCHEM	KEGG	Group HMDB	BIOCHEMICAL NAME	avg. WT_ZT0	avg. WT_ZT4	avg. WT_ZT8	avg. WT_ZT12	avg. WT_ZT16	avg. WT_ZT20	avg. KO_ZT0	avg. KO_ZT4	avg. KO_ZT8	avg. KO_ZT12	avg. KO_ZT16	avg. KO_ZT20	SEM. WT_ZT0	SEM. WT_ZT4	SEM. WT_ZT8	SEM. WT_ZT12	SEM. WT_ZT16	SEM. WT_ZT20	SEM. KO_ZT0	SEM. KO_ZT4	SEM. KO_ZT8	SEM. KO_ZT12	SEM. KO_ZT16	SEM. KO_ZT20
283	glutathione, oxidized (GSSG)	Amino acid	Glutathione metabolism	27727	LC/MS Pos	1535	613.1	103239-24-3;	6535911215652	C00127	HMDB03337	glutathione, oxidized (GSSG)	0.878018	0.95587	0.857706	0.774712	0.66106	0.89246	1.21125	1.10503	1.16128	1.1033	1.12077	1.09815	0.0364978	0.0642076	0.047149	0.130141	0.0784086	0.0739622	0.0774187	0.0612061	0.0683745	0.0964466	0.0977007	0.0391562
280	glutathione, reduced (GSH)	Amino acid	Glutathione metabolism	2127	LC/MS Pos	1274	308.1	70-18-8;	124886	C00051	HMDB00125	glutathione, reduced (GSH)	0.949976	0.820777	0.668322	0.891136	0.93631	0.904786	1.36227	1.28585	0.915505	0.987863	1.2091	1.14808	0.104986	0.088501	0.0892651	0.133763	0.119875	0.129334	0.236832	0.213468	0.103967	0.109592	0.0772892	0.0548664
Fig6G	Data extrapolated from Gene Expression Omnibus, accession number GSE43071
	mogene10stv1mmentrezgprobe ID	Gene Symbol	avg. WT_SOL_ZT0	avg. WT_SOL_ZT4	avg. WT_SOL_ZT8	avg. WT_SOL_ZT12	avg. WT_SOL_ZT16	avg. WT_SOL_ZT20	avg. WT_TA_ZT0	avg. WT_TA_ZT4	avg. WT_TA_ZT8	avg. WT_TA_ZT12	avg. WT_TA_ZT16	avg. WT_TA_ZT20	avg. KO_SOL_ZT0	avg. KO_SOL_ZT4	avg. KO_SOL_ZT8	avg. KO_SOL_ZT12	avg. KO_SOL_ZT16	avg. KO_SOL_ZT20	avg. KO_TA_ZT0	avg. KO_TA_ZT4	avg. KO_TA_ZT8	avg. KO_TA_ZT12	avg. KO_TA_ZT16	avg. KO_TA_ZT20	mean WT SOL	mean WT TA	mean KO SOL	mean KO TA	mean SOL WT/KO	mean TA WT/KO	mean WT SOL/TA	mean KO SOL/TA	max WT SOL	min WT SOL	max WT TA	min WT TA	max KO SOL	min KO SOL	max KO TA	min KO TA	WT SOL max/min	WT TA max/min	KO SOL max/min	KO TA max/min	AVG ALL	mogene10stv1mmentrezgprobe ID	Gene Symbol
	22228_at	Ucp2	588.414	706.427	836.58	838.363	759.989	525.421	244.479	306.964	329.379	388.65	382.614	276.724	1152.14	1212.97	2177.22	2072.89	2033.7	1821.51	287.065	266.945	313.843	384.49	406.55	283.683	709.199	321.469	1745.07	323.763	0.406401	0.992914	2.20612	5.38997	838.363	525.421	388.65	244.479	2177.22	1152.14	406.55	266.945	1.5956	1.5897	1.88973	1.52297	774.875	22228_at	Ucp2
	22229_at	Ucp3	296.485	728.131	692.969	629.706	374.384	176.144	600.335	1400.25	1151.74	961.546	882.483	609.088	219.39	516.329	940.322	517.551	274.731	185.528	442.415	883.791	1559.24	1101.74	711.799	482.826	482.97	934.24	442.308	863.635	1.09193	1.08175	0.516965	0.512147	728.131	176.144	1400.25	600.335	940.322	185.528	1559.24	442.415	4.13373	2.33245	5.06837	3.52438	680.788	22229_at	Ucp3
[truncated: 58 more columns]

## Sheet: Fig.7A,B,C,E
Fig7A&B	Body composition											Fig7C	muscle mass:bodyweight comparison
																			Fig.7D	Puromycin blot													Fig.7E	protein synthesis rate
	Mouse #	Genotype (Bmal1 / InsCre)	bodyweight	Fat	Lean		%fat	%lean	ratio lean/fat				mouse #	genotype	bodyweight (g)	weight TA (mg)				1) Scanned membrane/film-->600dpi			2) converted to grayscale			3) crop							puromycin/total protein
	47	WT	28.1	2.11	23.66		7.5089	84.1993	11.2133				112	WT	32.8	58.6																		% normalized to mean WT ZT4
	97	WT	29.3	2.88	24.2		9.82935	82.5939	8.40278				119	WT	29.4	49.2			Ponceau:															replicate	WT_ZT4	mKO_ZT4	WT_ZT16	mKO_ZT16
	112	WT	32	1.74	27.5		5.4375	85.9375	15.8046				131	WT	28.6	46.9																		1	83.1021	228.856	476.553	486.022
	113	WT	33.6	2.11	28.3		6.27976	84.2262	13.4123				141	WT	27	46.9																		2	48.9737	138.392	179.007	398.092
	119	WT	29.5	1.51	25.64		5.11864	86.9153	16.9801				113	WT	32	56.7																		3	112.216	493.401	288.476	296.777
	120	WT	31.2	1.39	27.47		4.45513	88.0449	19.7626				120	WT	30.4	44.3																		4	160.83	157.701	131.869	201.441
	131	WT	28.8	1.21	25.5		4.20139	88.5417	21.0744				135	WT	27.7	49.1																		5	94.8784	107.452	124.205	157.645
	135	WT	26.7	1.16	23.39		4.34457	87.603	20.1638				143	WT	27.1	48																		6	19.3176	286.979
	141	WT	26.7	1.87	22.75		7.00375	85.206	12.1658				BM3 31	WT	28.5	46.2																		7	71.395	625.326
	143	WT	26.4	1.95	22.57		7.38636	85.4924	11.5744				BM3 36	WT	28.3	48.2			Puromycin:										4) brightness +30%					8	209.287	161.082
	128	WT	32.7	1.64	28.93		5.01529	88.4709	17.6402				BM3 38	WT	25.4	41.4																		9	87.1453	195.613
	129	WT	31.4	2.82	26.35		8.98089	83.9172	9.34397				BM3 24	WT	26.1	43.3																		10	112.855	199.908
		avg	29.7	1.86583	25.5217	avg	6.29679	85.929	14.7949				BM3 27	WT	30	49.3
		sem	0.712975	0.16081	0.638994	sem	0.537968	0.572837	1.25957				BM3 28	WT	27.2	51.9
													BM3 15	WT	25.2	51.2																		avg	100	259.471	240.022	307.995
													BM3 22	WT	31.1	47.6																		sem	17.1163	53.3021	66.0031	60.7848
	Mouse #	Genotype (Bmal1 / InsCre)	bodyweight	Fat	Lean		%fat	%lean	ratio lean/fat				BM2* 17	WT	27.1	44.2
	45	KO	28.9	1.6	25.37		5.53633	87.7855	15.8562				BM2 72	WT	26	35.1
	111	KO	29.1	2.16	24.89		7.42268	85.5326	11.5231				BM2 88	WT	26.6	47
	118	KO	33.6	1.33	29.96		3.95833	89.1667	22.5263				BM2* 31	WT	26.9	49
	121	KO	28.9	1.09	25.51		3.77163	88.2699	23.4037				BM3 56	WT	25.5	41.9
	122	KO	29.2	0.81	26.14		2.77397	89.5205	32.2716				BM2* 29	WT	27.4	47.1
	132	KO	28	1.18	24.6		4.21429	87.8571	20.8475				BM2* 34	WT	25.3	41.1
	133	KO	29.2	0.89	25.96		3.04795	88.9041	29.1685				BM3 39	WT	28.8	51
	134	KO	29.6	0.94	26.35		3.17568	89.0203	28.0319				BM3 40	WT	27.7	48.8
	136	KO	31.2	0.9	27.93		2.88462	89.5192	31.0333				BM3 42	WT	30.5	54
	140	KO	28	1.52	24.63		5.42857	87.9643	16.2039				BM3 31	WT	28.5	50.3
	142	KO	27.2	1.45	23.76		5.33088	87.3529	16.3862				BM3 36	WT	28.3	51.3
		avg	29.3545	1.26091	25.9182	avg	4.32227	88.263	22.4775				BM3 38	WT	25.4	29.2
		sem	0.525074	0.122136	0.523972	sem	0.438776	0.353241	2.10749				BM3 24	WT	26.1	49.7
													BM3 27	WT	30	53.6
													BM3 28	WT	27.2	54.3
													BM3 15	WT	25.2	37.3
													BM3 22	WT	31.1	48.7
													BM2* 17	WT	27.1	49.1
													BM2 72	WT	26	45.1
													BM2 88	WT	26.6	48.9
													BM2* 31	WT	26.9	43.2
													BM3 56	WT	25.5	41.4
													BM2* 29	WT	27.4	52.6
													BM2* 34	WT	25.3	43.2
													BM3 39	WT	28.8	46.5
													BM3 40	WT	27.7	48
													BM3 42	WT	30.5	49.2
													mouse #	genotype	bodyweight (g) 09/07/15	weight Tadx (mg)
													111	KO	29.3	65.5
													132	KO	28.4	57.9
													134	KO	30.2	58.1
													140	KO	29.2	58.6
													118	KO	31.7	63.4
													133	KO	28	54.1
													136	KO	30.8	63.9
													142	KO	27.7	56.4
													BM3 12	KO	27.7	56.8
													BM3 13	KO	27.7	52.4
													BM3 33	KO	27.7	43.5
													BM3 37	KO	27.8	50
													BM3 3	KO	25.2	46.5
													BM3 7	KO	27.2	49.5
													BM3 8	KO	27	57.8
													BM3 14	KO	28.1	43
													BM3 23	KO	27.5	54.4
													BM2* 21	KO	32.3	64.3
													BM2 87	KO	25.8	46.6
													BM2* 24	KO	24.5	51
													BM2* 33	KO	27.8	53
													BM3 51	KO	27.5	59.4
													BM3 52	KO	26.6	53.4
													BM2 95	KO	25.9	45.5
													BM2 100	KO	27.1	55.2
													BM2 103	KO	24.3	50.3
													BM3 12	KO	27.7	49.5
													BM3 13	KO	27.7	53.6
													BM3 37	KO	27.8	59.5
													BM3 3	KO	25.2	51.8
													BM3 7	KO	27.2	44.2
													BM3 8	KO	27	54.1
													BM3 14	KO	28.1	60.7
													BM3 23	KO	27.5	51.5
													BM2* 21	KO	32.3	63.8
													BM2 87	KO	25.8	49.2
													BM2* 24	KO	24.5	53.3
													BM2* 33	KO	27.8	55.4
													BM3 50	KO	29.8	58.2
													BM3 51	KO	27.5	54.3
													BM3 52	KO	26.6	61.1
													BM2 95	KO	25.9	45.7
													BM2 100	KO	27.1	58.2
													BM2 103	KO	24.3	40.3

## Sheet: Fig.7F
cumulative food intake at 30C	WT										mKO
genotype	wt_1	wt_2	wt_3	wt_4	wt_5	wt_6	wt_7	wt_8	wt_9	wt_10	ko_1	ko_2	ko_3	ko_4	ko_5	ko_6	ko_7	ko_8	ko_9	ko_10
Time (hr)	[g]	[g]	[g]	[g]	[g]	[g]	[g]	[g]	[g]	[g]	[g]	[g]	[g]	[g]	[g]	[g]	[g]	[g]	[g]	[g]	AVG WT	AVG mKO	SEM WT	SEM mKO
0	0.02	0.05	0.04	0.01	0.07	0.07	0.02	0.06	0.07	0.04	0.06	0.04	0.06	0.2	0.06	0.08	0.06	0	0.04	0.06	0.045	0.066	0.00718795	0.0163435
0.08	0.02	0.05	0.04	0.01	0.07	0.07	0.02	0.06	0.07	0.04	0.09	0.04	0.06	0.2	0.06	0.08	0.06	0.01	0.04	0.06	0.045	0.07	0.00718795	0.0160555
0.17	0.02	0.05	0.04	0.02	0.07	0.07	0.02	0.06	0.07	0.04	0.09	0.04	0.06	0.2	0.06	0.08	0.06	0.01	0.05	0.06	0.046	0.071	0.00669992	0.015878
0.25	0.02	0.05	0.05	0.02	0.07	0.07	0.02	0.06	0.07	0.05	0.09	0.04	0.06	0.2	0.06	0.08	0.06	0.01	0.05	0.06	0.048	0.071	0.00663325	0.015878
0.33	0.02	0.05	0.05	0.02	0.07	0.07	0.02	0.06	0.07	0.05	0.09	0.04	0.06	0.2	0.06	0.08	0.06	0.01	0.05	0.06	0.048	0.071	0.00663325	0.015878
0.42	0.02	0.05	0.05	0.02	0.07	0.07	0.02	0.06	0.07	0.05	0.09	0.04	0.06	0.2	0.06	0.12	0.06	0.01	0.05	0.06	0.048	0.075	0.00663325	0.0166166
0.5	0.02	0.05	0.19	0.02	0.07	0.07	0.02	0.06	0.07	0.05	0.09	0.04	0.06	0.2	0.06	0.12	0.06	0.01	0.05	0.06	0.062	0.075	0.0156915	0.0166166
0.58	0.02	0.05	0.19	0.02	0.07	0.07	0.02	0.06	0.08	0.05	0.09	0.04	0.06	0.2	0.06	0.12	0.06	0.01	0.05	0.06	0.063	0.075	0.0157797	0.0166166
0.67	0.02	0.05	0.19	0.02	0.07	0.07	0.02	0.06	0.08	0.05	0.09	0.04	0.06	0.2	0.06	0.12	0.14	0.01	0.05	0.06	0.063	0.083	0.0157797	0.0177044
0.75	0.02	0.05	0.19	0.02	0.07	0.08	0.02	0.06	0.08	0.05	0.09	0.04	0.06	0.2	0.12	0.12	0.2	0.01	0.05	0.06	0.064	0.095	0.0158605	0.0205616
0.83	0.02	0.05	0.2	0.02	0.07	0.08	0.02	0.06	0.09	0.05	0.09	0.04	0.06	0.2	0.2	0.12	0.2	0.01	0.05	0.08	0.066	0.105	0.0168787	0.0227181
0.92	0.13	0.05	0.2	0.02	0.07	0.08	0.02	0.06	0.09	0.06	0.09	0.04	0.06	0.2	0.2	0.12	0.2	0.01	0.05	0.23	0.078	0.12	0.0169837	0.0256472
1	0.2	0.05	0.2	0.02	0.07	0.08	0.02	0.06	0.09	0.06	0.09	0.05	0.11	0.2	0.2	0.12	0.2	0.01	0.05	0.23	0.085	0.126	0.0204532	0.0244586
1.08	0.2	0.05	0.2	0.02	0.2	0.08	0.02	0.08	0.09	0.06	0.09	0.24	0.27	0.2	0.2	0.12	0.2	0.01	0.05	0.23	0.1	0.161	0.0230458	0.0277469
1.17	0.2	0.05	0.2	0.02	0.38	0.08	0.02	0.08	0.09	0.09	0.09	0.27	0.31	0.2	0.2	0.12	0.2	0.01	0.05	0.23	0.121	0.168	0.0350063	0.0306884
1.25	0.2	0.05	0.2	0.02	0.38	0.08	0.02	0.08	0.09	0.09	0.09	0.27	0.31	0.2	0.2	0.12	0.2	0.01	0.06	0.24	0.121	0.17	0.0350063	0.0305141
1.33	0.2	0.05	0.2	0.02	0.38	0.09	0.03	0.08	0.09	0.1	0.09	0.27	0.31	0.2	0.2	0.12	0.2	0.01	0.06	0.24	0.124	0.17	0.0344867	0.0305141
1.42	0.2	0.05	0.2	0.02	0.38	0.12	0.04	0.08	0.09	0.1	0.09	0.27	0.32	0.2	0.22	0.12	0.2	0.01	0.06	0.24	0.128	0.173	0.0339869	0.0313067
1.5	0.2	0.05	0.2	0.02	0.38	0.12	0.04	0.08	0.09	0.1	0.09	0.27	0.32	0.25	0.22	0.12	0.2	0.02	0.06	0.24	0.128	0.179	0.0339869	0.0316034
1.58	0.2	0.05	0.2	0.02	0.39	0.12	0.04	0.08	0.16	0.1	0.09	0.27	0.32	0.26	0.22	0.12	0.2	0.02	0.07	0.24	0.136	0.181	0.0346474	0.0314625
1.67	0.2	0.06	0.21	0.07	0.39	0.12	0.04	0.08	0.16	0.1	0.09	0.27	0.32	0.26	0.22	0.12	0.2	0.02	0.07	0.24	0.143	0.181	0.0330337	0.0314625
1.75	0.2	0.12	0.38	0.15	0.39	0.12	0.04	0.08	0.16	0.1	0.09	0.27	0.32	0.26	0.23	0.12	0.35	0.02	0.07	0.24	0.174	0.197	0.0378065	0.0358407
1.83	0.2	0.12	0.38	0.15	0.39	0.12	0.04	0.08	0.16	0.1	0.09	0.27	0.32	0.26	0.23	0.12	0.44	0.02	0.07	0.24	0.174	0.206	0.0378065	0.0408847
1.92	0.2	0.12	0.38	0.15	0.39	0.12	0.04	0.08	0.16	0.11	0.09	0.27	0.32	0.26	0.23	0.12	0.44	0.02	0.1	0.24	0.175	0.209	0.0376017	0.0398734
2	0.2	0.12	0.38	0.15	0.39	0.12	0.04	0.08	0.16	0.11	0.09	0.27	0.32	0.26	0.23	0.12	0.45	0.02	0.25	0.24	0.175	0.225	0.0376017	0.038737
2.08	0.2	0.12	0.38	0.15	0.39	0.12	0.04	0.13	0.16	0.11	0.09	0.27	0.32	0.26	0.23	0.12	0.45	0.03	0.26	0.24	0.18	0.227	0.0365148	0.0382405
2.17	0.35	0.12	0.38	0.15	0.39	0.12	0.04	0.13	0.16	0.11	0.09	0.27	0.32	0.26	0.23	0.12	0.45	0.03	0.27	0.24	0.195	0.228	0.0403113	0.0383493
2.25	0.35	0.12	0.38	0.15	0.39	0.12	0.04	0.13	0.16	0.12	0.09	0.27	0.32	0.27	0.29	0.22	0.45	0.03	0.27	0.24	0.196	0.245	0.0400888	0.0368857
2.33	0.35	0.12	0.38	0.17	0.39	0.12	0.04	0.13	0.16	0.12	0.09	0.27	0.32	0.27	0.29	0.22	0.45	0.18	0.27	0.24	0.198	0.26	0.0398832	0.0294769
2.42	0.35	0.12	0.39	0.27	0.39	0.13	0.04	0.13	0.16	0.27	0.09	0.27	0.32	0.27	0.29	0.22	0.45	0.18	0.27	0.25	0.225	0.261	0.0396723	0.0294184
2.5	0.35	0.12	0.39	0.27	0.39	0.13	0.04	0.13	0.16	0.29	0.09	0.27	0.32	0.27	0.29	0.22	0.45	0.18	0.27	0.25	0.227	0.261	0.0399736	0.0294184
2.58	0.35	0.12	0.39	0.27	0.39	0.13	0.04	0.13	0.16	0.3	0.11	0.27	0.32	0.27	0.29	0.22	0.45	0.18	0.27	0.25	0.228	0.263	0.0401608	0.0281681
2.67	0.35	0.12	0.39	0.27	0.39	0.13	0.04	0.13	0.16	0.3	0.2	0.27	0.32	0.27	0.29	0.22	0.45	0.18	0.28	0.36	0.228	0.284	0.0401608	0.0251749
2.75	0.47	0.12	0.39	0.27	0.39	0.13	0.04	0.13	0.16	0.3	0.22	0.27	0.32	0.27	0.29	0.23	0.45	0.18	0.28	0.42	0.24	0.293	0.0456314	0.0268349
2.83	0.48	0.12	0.39	0.27	0.39	0.13	0.04	0.13	0.16	0.3	0.23	0.27	0.32	0.27	0.29	0.23	0.45	0.18	0.28	0.42	0.241	0.294	0.0461988	0.0265497
2.92	0.48	0.12	0.39	0.27	0.39	0.15	0.04	0.13	0.16	0.3	0.23	0.31	0.32	0.27	0.29	0.23	0.45	0.18	0.28	0.45	0.243	0.301	0.0457056	0.028105
3	0.48	0.18	0.39	0.27	0.39	0.15	0.04	0.13	0.16	0.3	0.23	0.39	0.32	0.31	0.29	0.23	0.45	0.18	0.28	0.45	0.249	0.313	0.0442832	0.0291757
3.08	0.48	0.18	0.39	0.27	0.39	0.15	0.04	0.13	0.16	0.3	0.23	0.39	0.32	0.37	0.29	0.23	0.45	0.18	0.28	0.45	0.249	0.319	0.0442832	0.0297191
3.17	0.48	0.18	0.39	0.28	0.39	0.15	0.04	0.24	0.16	0.31	0.23	0.39	0.32	0.37	0.39	0.23	0.46	0.18	0.28	0.45	0.262	0.33	0.0424735	0.0307679
3.25	0.48	0.18	0.39	0.43	0.39	0.16	0.05	0.35	0.17	0.31	0.23	0.39	0.52	0.37	0.39	0.23	0.47	0.18	0.28	0.45	0.291	0.351	0.044807	0.0364372
3.33	0.48	0.18	0.39	0.49	0.39	0.16	0.07	0.42	0.19	0.32	0.23	0.39	0.7	0.37	0.39	0.23	0.47	0.18	0.28	0.45	0.309	0.369	0.0468674	0.0482459
3.42	0.48	0.23	0.39	0.49	0.39	0.16	0.25	0.43	0.21	0.46	0.23	0.39	0.71	0.37	0.39	0.23	0.47	0.18	0.28	0.45	0.349	0.37	0.0391989	0.0490125
3.5	0.48	0.29	0.39	0.49	0.39	0.16	0.25	0.43	0.33	0.46	0.23	0.39	0.71	0.37	0.39	0.23	0.47	0.18	0.29	0.45	0.367	0.371	0.0342231	0.0488183
3.58	0.48	0.29	0.39	0.49	0.39	0.16	0.25	0.43	0.39	0.46	0.23	0.39	0.71	0.37	0.39	0.23	0.47	0.18	0.29	0.45	0.373	0.371	0.0340278	0.0488183
3.67	0.48	0.29	0.39	0.49	0.39	0.16	0.25	0.43	0.39	0.46	0.29	0.39	0.71	0.44	0.39	0.24	0.47	0.18	0.29	0.45	0.373	0.385	0.0340278	0.0472875
3.75	0.48	0.29	0.48	0.49	0.4	0.16	0.25	0.43	0.39	0.46	0.35	0.39	0.71	0.44	0.39	0.24	0.47	0.18	0.29	0.45	0.383	0.391	0.0357165	0.0463189
3.83	0.48	0.29	0.51	0.49	0.4	0.16	0.25	0.43	0.39	0.46	0.35	0.4	0.71	0.44	0.44	0.24	0.47	0.18	0.29	0.45	0.386	0.397	0.0367333	0.0465725
3.92	0.48	0.29	0.51	0.49	0.4	0.16	0.25	0.43	0.39	0.46	0.36	0.4	0.71	0.44	0.48	0.24	0.47	0.18	0.36	0.45	0.386	0.409	0.0367333	0.045691
4	0.49	0.29	0.51	0.49	0.4	0.17	0.25	0.43	0.39	0.46	0.36	0.42	0.71	0.44	0.48	0.24	0.47	0.18	0.39	0.45	0.388	0.414	0.0363563	0.0454166
4.08	0.49	0.29	0.51	0.49	0.4	0.17	0.25	0.43	0.39	0.46	0.36	0.57	0.71	0.44	0.48	0.24	0.47	0.18	0.39	0.49	0.388	0.433	0.0363563	0.0483977
4.17	0.49	0.29	0.58	0.49	0.4	0.17	0.25	0.43	0.39	0.46	0.36	0.64	0.71	0.44	0.48	0.24	0.47	0.18	0.39	0.49	0.395	0.44	0.0395039	0.0510338
4.25	0.49	0.29	0.58	0.49	0.4	0.17	0.25	0.43	0.39	0.46	0.36	0.64	0.71	0.44	0.48	0.24	0.47	0.18	0.4	0.5	0.395	0.442	0.0395039	0.0510512
4.33	0.49	0.29	0.58	0.49	0.4	0.17	0.25	0.43	0.39	0.46	0.36	0.64	0.71	0.52	0.48	0.24	0.47	0.18	0.4	0.5	0.395	0.45	0.0395039	0.0516398
4.42	0.49	0.29	0.58	0.49	0.4	0.17	0.25	0.43	0.39	0.46	0.36	0.64	0.71	0.53	0.48	0.25	0.47	0.24	0.4	0.5	0.395	0.458	0.0395039	0.0480694
4.5	0.49	0.29	0.58	0.49	0.4	0.17	0.25	0.43	0.39	0.46	0.36	0.64	0.71	0.54	0.48	0.25	0.49	0.32	0.4	0.5	0.395	0.469	0.0395039	0.044807
4.58	0.49	0.29	0.58	0.49	0.41	0.19	0.25	0.43	0.39	0.46	0.36	0.64	0.71	0.54	0.48	0.25	0.49	0.32	0.4	0.5	0.398	0.469	0.0382913	0.044807
4.67	0.49	0.29	0.58	0.49	0.54	0.19	0.25	0.43	0.39	0.46	0.36	0.64	0.71	0.54	0.48	0.25	0.49	0.32	0.4	0.5	0.411	0.469	0.0408643	0.044807
4.75	0.49	0.32	0.58	0.49	0.54	0.19	0.25	0.44	0.39	0.48	0.36	0.64	0.71	0.54	0.48	0.25	0.49	0.32	0.4	0.5	0.417	0.469	0.0403333	0.044807
4.83	0.6	0.32	0.58	0.49	0.54	0.2	0.25	0.44	0.39	0.56	0.36	0.64	0.71	0.63	0.48	0.25	0.49	0.32	0.4	0.55	0.437	0.483	0.0450444	0.0477505
4.92	0.6	0.32	0.58	0.5	0.54	0.2	0.25	0.44	0.39	0.56	0.36	0.64	0.71	0.63	0.48	0.28	0.49	0.32	0.4	0.55	0.438	0.486	0.045186	0.0461928
5	0.6	0.32	0.58	0.58	0.54	0.2	0.25	0.44	0.39	0.56	0.4	0.64	0.72	0.63	0.51	0.35	0.49	0.32	0.4	0.55	0.446	0.501	0.0470744	0.0424905
5.08	0.6	0.32	0.58	0.72	0.54	0.2	0.25	0.56	0.39	0.56	0.4	0.64	0.72	0.63	0.51	0.36	0.49	0.32	0.4	0.55	0.472	0.502	0.0540329	0.0421057
5.17	0.6	0.32	0.73	0.72	0.54	0.2	0.25	0.57	0.39	0.56	0.4	0.64	0.72	0.63	0.54	0.36	0.49	0.32	0.4	0.55	0.488	0.505	0.0593446	0.0422756
5.25	0.6	0.32	0.74	0.72	0.54	0.2	0.25	0.57	0.39	0.56	0.4	0.64	0.72	0.63	0.54	0.36	0.54	0.32	0.41	0.55	0.489	0.511	0.0598043	0.0420965
5.33	0.6	0.32	0.74	0.72	0.55	0.2	0.25	0.58	0.39	0.56	0.4	0.64	0.72	0.63	0.54	0.36	0.65	0.34	0.41	0.55	0.491	0.524	0.0600639	0.0433385
5.42	0.6	0.32	0.74	0.72	0.55	0.2	0.25	0.58	0.47	0.57	0.4	0.65	0.72	0.63	0.54	0.36	0.65	0.34	0.41	0.55	0.5	0.525	0.0592171	0.0436463
5.5	0.6	0.32	0.74	0.72	0.55	0.2	0.25	0.58	0.48	0.57	0.4	0.84	0.72	0.63	0.54	0.36	0.65	0.36	0.6	0.55	0.501	0.565	0.0591692	0.0499389
5.58	0.6	0.32	0.74	0.73	0.55	0.2	0.25	0.58	0.48	0.57	0.4	0.85	0.72	0.63	0.54	0.36	0.65	0.43	0.6	0.55	0.502	0.573	0.0595875	0.047797
5.67	0.61	0.32	0.74	0.73	0.55	0.21	0.25	0.58	0.48	0.71	0.4	0.85	0.72	0.76	0.54	0.36	0.65	0.43	0.6	0.55	0.518	0.586	0.0625176	0.0511686
5.75	0.61	0.32	0.74	0.73	0.55	0.21	0.33	0.58	0.48	0.72	0.4	0.85	0.72	0.77	0.54	0.36	0.65	0.43	0.6	0.56	0.527	0.588	0.0594802	0.0514846
5.83	0.61	0.32	0.75	0.73	0.55	0.21	0.4	0.58	0.48	0.72	0.4	0.85	0.72	0.77	0.54	0.37	0.65	0.43	0.6	0.67	0.535	0.6	0.0576821	0.0514889
5.92	0.61	0.32	0.84	0.73	0.55	0.21	0.41	0.58	0.48	0.72	0.4	0.85	0.72	0.77	0.54	0.37	0.65	0.43	0.6	0.67	0.545	0.6	0.0617027	0.0514889
6	0.61	0.32	0.86	0.8	0.55	0.21	0.41	0.58	0.48	0.72	0.43	0.85	0.72	0.77	0.55	0.39	0.65	0.43	0.6	0.67	0.554	0.606	0.0653911	0.0491302
6.08	0.69	0.32	0.86	0.99	0.55	0.21	0.41	0.59	0.49	0.72	0.46	0.85	0.72	0.77	0.55	0.41	0.65	0.43	0.6	0.67	0.583	0.611	0.0760563	0.0470331
6.17	0.73	0.36	0.86	1	0.55	0.21	0.41	0.59	0.49	0.72	0.52	0.85	0.72	0.8	0.55	0.57	0.65	0.43	0.6	0.67	0.592	0.636	0.075921	0.0408303
6.25	0.74	0.38	0.86	1	0.55	0.22	0.41	0.59	0.49	0.72	0.52	0.85	0.72	0.84	0.62	0.57	0.65	0.49	0.6	0.67	0.596	0.653	0.0749103	0.0385299
6.33	0.74	0.38	0.86	1	0.55	0.22	0.41	0.59	0.49	0.73	0.52	0.85	0.72	0.85	0.62	0.57	0.76	0.5	0.6	0.67	0.597	0.666	0.0751007	0.0400056
6.42	0.74	0.38	0.86	1	0.55	0.22	0.41	0.71	0.5	0.73	0.53	0.85	0.72	0.85	0.63	0.57	0.76	0.54	0.62	0.67	0.61	0.674	0.0757628	0.0373928
6.5	0.83	0.38	0.86	1	0.55	0.27	0.41	0.78	0.51	0.73	0.57	1.11	0.72	0.85	0.63	0.57	0.84	0.58	0.62	0.67	0.632	0.716	0.0762714	0.0546138
6.58	0.83	0.38	1	1	0.55	0.27	0.41	0.9	0.51	0.83	0.57	1.11	0.82	0.85	0.63	0.57	0.85	0.58	0.64	0.73	0.668	0.735	0.0865101	0.0550606
6.67	0.89	0.38	1.04	1	0.6	0.27	0.41	0.9	0.53	0.83	0.67	1.11	0.98	0.85	0.72	0.57	0.85	0.65	0.72	0.8	0.685	0.792	0.0886096	0.0514198
6.75	0.9	0.38	1.04	1	0.71	0.27	0.47	0.9	0.67	0.83	0.67	1.11	1.13	0.89	0.72	0.64	0.89	0.69	0.72	0.81	0.717	0.827	0.0843808	0.0559176
6.83	0.95	0.38	1.04	1	0.71	0.27	0.58	0.9	0.73	0.83	0.67	1.11	1.14	0.96	0.78	0.68	1.06	0.69	0.72	0.81	0.739	0.862	0.0824951	0.0593258
6.92	0.96	0.38	1.04	1	0.71	0.37	0.58	0.9	0.73	0.83	0.67	1.12	1.14	0.96	0.86	0.68	1.06	0.69	0.72	0.88	0.75	0.878	0.0768693	0.0587045
7	0.96	0.38	1.04	1.01	0.88	0.37	0.58	0.9	0.73	0.83	0.71	1.14	1.29	0.99	0.86	0.68	1.06	0.69	0.83	0.94	0.768	0.919	0.0780997	0.0646778
7.08	0.96	0.38	1.04	1.03	0.96	0.37	0.59	0.9	0.73	0.83	0.75	1.14	1.29	1.02	0.86	0.68	1.06	0.69	0.83	0.94	0.779	0.926	0.0801727	0.0637739
7.17	0.96	0.43	1.05	1.03	0.97	0.37	0.62	0.9	0.73	1	0.75	1.14	1.29	1.02	0.86	0.73	1.15	0.7	0.83	0.94	0.806	0.941	0.0801831	0.0640564
7.25	1.05	0.46	1.09	1.03	0.97	0.37	0.62	0.91	0.73	1	0.76	1.14	1.29	1.07	1	0.74	1.2	0.7	0.83	0.94	0.823	0.967	0.0825301	0.0654395
7.33	1.11	0.57	1.1	1.03	0.97	0.37	0.62	0.91	0.73	1	0.9	1.14	1.29	1.09	1	0.74	1.21	0.7	0.83	0.96	0.841	0.986	0.0801589	0.0625424
7.42	1.11	0.57	1.1	1.03	0.97	0.39	0.69	0.91	0.74	1.12	0.91	1.14	1.39	1.09	1	0.74	1.26	0.76	0.83	1.13	0.863	1.025	0.0802365	0.0683333
7.5	1.11	0.57	1.1	1.03	0.97	0.4	0.69	0.91	0.74	1.2	1.01	1.14	1.4	1.09	1.01	0.83	1.26	0.88	0.91	1.13	0.872	1.066	0.0827822	0.0558012
7.58	1.11	0.57	1.1	1.03	0.97	0.4	0.69	0.97	0.84	1.2	1.01	1.16	1.4	1.09	1.01	0.83	1.29	0.98	1.02	1.13	0.888	1.092	0.0820542	0.0516355
7.67	1.22	0.57	1.2	1.03	1.13	0.43	0.79	1.08	0.95	1.2	1.01	1.37	1.42	1.21	1.01	0.83	1.32	0.98	1.02	1.14	0.96	1.131	0.0877496	0.0612545
7.75	1.22	0.58	1.31	1.06	1.29	0.43	0.88	1.2	1.04	1.2	1.01	1.38	1.61	1.24	1.14	0.83	1.39	0.98	1.03	1.14	1.021	1.175	0.0957479	0.0737451
7.83	1.22	0.62	1.31	1.1	1.31	0.43	0.88	1.21	1.05	1.2	1.09	1.38	1.62	1.24	1.2	0.87	1.48	1.04	1.07	1.14	1.033	1.213	0.0948689	0.0710407
7.92	1.25	0.71	1.39	1.15	1.31	0.43	0.88	1.21	1.05	1.2	1.09	1.38	1.62	1.24	1.2	0.95	1.48	1.16	1.07	1.14	1.058	1.233	0.0948426	0.0645161
8	1.25	0.74	1.43	1.24	1.31	0.44	0.91	1.21	1.05	1.2	1.09	1.38	1.62	1.33	1.2	0.95	1.48	1.16	1.07	1.29	1.078	1.257	0.0952284	0.064361
8.08	1.26	0.82	1.43	1.31	1.31	0.44	0.91	1.21	1.05	1.2	1.09	1.38	1.62	1.38	1.24	0.96	1.48	1.16	1.23	1.36	1.094	1.29	0.0941063	0.0612826
8.17	1.35	0.83	1.43	1.31	1.31	0.44	0.91	1.21	1.05	1.2	1.13	1.38	1.62	1.38	1.24	0.96	1.56	1.16	1.23	1.36	1.104	1.302	0.0959537	0.0631541
8.25	1.35	0.83	1.43	1.31	1.31	0.45	0.91	1.22	1.05	1.2	1.2	1.38	1.64	1.47	1.24	1	1.56	1.16	1.23	1.36	1.106	1.324	0.0953147	0.0618636
8.33	1.35	0.83	1.43	1.31	1.31	0.54	0.94	1.25	1.05	1.22	1.2	1.39	1.75	1.54	1.33	1	1.67	1.16	1.23	1.36	1.123	1.363	0.0885569	0.0741178
8.42	1.47	0.85	1.5	1.45	1.31	0.54	1.18	1.36	1.05	1.22	1.2	1.41	1.75	1.54	1.38	1	1.67	1.16	1.23	1.37	1.193	1.371	0.0968395	0.0741238
8.5	1.47	0.85	1.51	1.46	1.31	0.54	1.18	1.52	1.08	1.22	1.21	1.53	1.75	1.54	1.38	1	1.67	1.16	1.23	1.37	1.214	1.384	0.101239	0.075516
8.58	1.47	0.85	1.51	1.46	1.31	0.54	1.18	1.52	1.13	1.22	1.3	1.63	1.75	1.54	1.38	1.12	1.67	1.16	1.23	1.37	1.219	1.415	0.100625	0.0700674
8.67	1.57	0.85	1.51	1.55	1.31	0.54	1.18	1.52	1.13	1.22	1.71	1.64	1.75	1.54	1.38	1.12	1.67	1.3	1.32	1.37	1.238	1.48	0.106425	0.0667333
8.75	1.57	0.89	1.55	1.55	1.31	0.54	1.25	1.52	1.14	1.22	1.72	1.64	1.75	1.54	1.39	1.13	1.67	1.35	1.5	1.58	1.254	1.527	0.105696	0.0607005
8.83	1.57	0.93	1.69	1.55	1.44	0.54	1.25	1.52	1.14	1.37	1.72	1.64	1.75	1.54	1.39	1.13	1.67	1.35	1.5	1.58	1.3	1.527	0.110705	0.0607005
8.92	1.58	1.02	1.69	1.62	1.61	0.64	1.25	1.53	1.14	1.37	1.72	1.64	1.8	1.54	1.52	1.13	1.68	1.36	1.52	1.59	1.345	1.55	0.105864	0.0607728
9	1.68	1.16	1.69	1.62	1.61	1.16	1.25	1.53	1.14	1.37	1.72	1.64	1.99	1.6	1.56	1.13	1.71	1.38	1.52	1.59	1.421	1.584	0.0725481	0.0711056
9.08	1.69	1.2	1.69	1.64	1.61	1.18	1.26	1.53	1.15	1.37	1.72	1.64	1.99	1.69	1.56	1.24	1.78	1.41	1.52	1.59	1.432	1.614	0.0705502	0.0650162
9.17	1.69	1.2	1.69	1.65	1.61	1.18	1.26	1.53	1.15	1.37	1.72	1.8	1.99	1.69	1.56	1.35	1.87	1.58	1.52	1.61	1.433	1.669	0.0708841	0.0587736
9.25	1.69	1.2	1.69	1.72	1.61	1.18	1.26	1.53	1.15	1.37	1.72	1.97	1.99	1.69	1.56	1.35	1.87	1.58	1.56	1.67	1.44	1.696	0.0735603	0.0635295
9.33	1.69	1.21	1.74	1.72	1.61	1.18	1.31	1.53	1.15	1.37	1.72	1.99	1.99	1.69	1.57	1.35	1.87	1.58	1.56	1.67	1.451	1.699	0.0740188	0.0642815
9.42	1.69	1.23	1.88	1.72	1.61	1.18	1.45	1.59	1.23	1.63	1.72	1.99	1.99	1.81	1.57	1.35	1.9	1.58	1.56	1.68	1.521	1.715	0.0754461	0.0660177
9.5	1.69	1.39	1.88	1.76	1.61	1.18	1.47	1.8	1.23	1.64	1.72	1.99	1.99	1.81	1.57	1.35	1.97	1.59	1.56	1.68	1.565	1.723	0.0757078	0.0682976
9.58	1.7	1.55	1.88	1.76	1.61	1.18	1.48	1.8	1.32	1.65	1.72	1.99	1.99	1.82	1.57	1.35	1.97	1.59	1.59	1.69	1.593	1.728	0.0689452	0.0676396
9.67	1.74	1.55	1.88	1.76	1.61	1.18	1.49	1.81	1.43	1.65	1.72	1.99	1.99	1.82	1.57	1.35	2.09	1.59	1.74	1.69	1.61	1.755	0.0657605	0.0713403
9.75	1.74	1.55	1.88	1.76	1.61	1.18	1.49	1.81	1.43	1.65	1.72	1.99	1.99	1.82	1.57	1.35	2.1	1.59	1.74	1.81	1.61	1.768	0.0657605	0.0716442
9.83	1.74	1.56	1.97	1.76	1.61	1.18	1.49	1.81	1.43	1.65	1.72	1.99	1.99	1.88	1.73	1.35	2.14	1.59	1.74	1.82	1.62	1.795	0.0702219	0.0711688
9.92	1.86	1.56	1.97	1.76	1.65	1.18	1.49	1.81	1.43	1.65	1.72	1.99	2.03	1.97	1.73	1.35	2.16	1.59	1.74	1.82	1.636	1.81	0.0734272	0.0751591
10	1.86	1.56	1.97	1.77	1.65	1.18	1.49	1.81	1.43	1.65	1.72	1.99	2.19	2.01	1.73	1.35	2.27	1.59	1.74	1.83	1.637	1.842	0.0736214	0.0880631
10.08	1.86	1.57	1.97	1.92	1.65	1.18	1.49	1.81	1.43	1.65	1.72	1.99	2.19	2.01	1.73	1.35	2.27	1.59	1.75	1.83	1.653	1.843	0.0779038	0.08794
10.17	1.86	1.69	1.98	2.03	1.65	1.18	1.49	1.81	1.43	1.65	1.81	1.99	2.2	2.01	1.73	1.35	2.27	1.59	1.77	1.83	1.677	1.855	0.0824763	0.0871939
10.25	1.86	1.77	1.98	2.03	1.66	1.18	1.61	1.81	1.43	1.66	1.81	1.99	2.2	2.01	1.73	1.35	2.29	1.59	1.77	1.83	1.699	1.857	0.0805874	0.0882679
10.33	1.87	1.82	2.07	2.03	1.66	1.18	1.7	1.81	1.43	1.89	1.81	1.99	2.2	2.01	1.73	1.36	2.33	1.6	1.77	1.83	1.746	1.863	0.0857023	0.0895551
10.42	1.89	1.82	2.07	2.07	1.88	1.18	1.7	1.81	1.43	1.89	1.81	2.12	2.36	2.01	1.73	1.45	2.39	1.6	1.77	1.83	1.774	1.907	0.0877775	0.0979234
10.5	1.95	1.82	2.07	2.2	1.91	1.18	1.7	1.81	1.43	1.89	1.81	2.19	2.42	2.01	1.73	1.45	2.39	1.73	1.78	1.89	1.796	1.94	0.0947066	0.0985224
10.58	1.95	1.82	2.07	2.2	1.91	1.18	1.7	1.81	1.43	1.89	1.81	2.19	2.58	2.01	1.73	1.45	2.55	1.77	1.78	1.92	1.796	1.979	0.0947066	0.114983
10.67	1.95	1.83	2.07	2.2	2.05	1.19	1.7	1.81	1.43	1.89	1.81	2.19	2.58	2.01	1.73	1.45	2.55	1.79	1.78	1.94	1.812	1.983	0.096871	0.114495
10.75	1.97	2.01	2.07	2.2	2.11	1.19	1.7	1.81	1.43	1.89	1.81	2.19	2.58	2.01	1.73	1.45	2.57	1.8	1.78	1.94	1.838	1.986	0.100817	0.115424
10.83	2.07	2.06	2.07	2.26	2.11	1.19	1.76	1.81	1.45	1.89	1.81	2.19	2.58	2.03	1.73	1.45	2.69	1.8	1.87	1.94	1.867	2.009	0.104382	0.121138
10.92	2.07	2.06	2.11	2.34	2.11	1.19	1.9	1.81	1.57	1.89	1.99	2.19	2.58	2.4	1.73	1.47	2.69	1.8	1.92	1.94	1.905	2.071	0.103132	0.123022
11	2.07	2.06	2.29	2.34	2.11	1.19	1.9	1.81	1.66	1.89	2	2.19	2.58	2.4	1.73	1.47	2.69	1.8	1.96	2.08	1.932	2.09	0.105618	0.121536
11.08	2.07	2.06	2.29	2.34	2.11	1.19	1.91	1.81	1.68	1.89	2	2.19	2.58	2.4	1.73	1.48	2.69	1.8	1.96	2.09	1.935	2.092	0.105032	0.120966
11.17	2.07	2.06	2.29	2.34	2.11	1.19	1.91	1.81	1.68	1.89	2.02	2.19	2.58	2.4	1.73	1.5	2.69	1.83	1.96	2.09	1.935	2.099	0.105032	0.118907
11.25	2.07	2.06	2.29	2.44	2.11	1.19	1.91	1.81	1.68	2.03	2.02	2.19	2.63	2.41	1.84	1.61	2.77	1.83	1.96	2.09	1.959	2.135	0.109802	0.116831
11.33	2.07	2.06	2.29	2.48	2.11	1.19	1.91	1.81	1.68	2.03	2.02	2.19	2.84	2.41	1.92	1.65	2.84	1.83	1.96	2.09	1.963	2.175	0.111804	0.128108
11.42	2.07	2.06	2.29	2.49	2.11	1.19	1.91	1.81	1.68	2.03	2.02	2.19	2.86	2.41	1.93	1.72	2.84	1.91	1.96	2.09	1.964	2.193	0.112321	0.123756
11.5	2.07	2.06	2.29	2.65	2.11	1.19	1.91	1.84	1.7	2.03	2.02	2.19	2.86	2.41	1.93	1.72	2.84	1.91	1.96	2.11	1.985	2.195	0.120446	0.123588
11.58	2.07	2.06	2.29	2.65	2.11	1.19	1.91	1.84	1.7	2.03	2.2	2.19	2.86	2.41	1.93	1.72	2.92	1.91	1.96	2.18	1.985	2.228	0.120446	0.126305
11.67	2.07	2.06	2.29	2.65	2.2	1.19	1.91	1.84	1.7	2.03	2.2	2.27	2.86	2.41	1.93	1.74	2.92	1.91	2.05	2.2	1.994	2.249	0.121812	0.123382
11.75	2.07	2.09	2.29	2.65	2.43	1.19	1.92	2.01	1.82	2.03	2.2	2.29	2.88	2.41	1.93	1.78	2.92	1.91	2.14	2.2	2.05	2.266	0.123621	0.121401
11.83	2.07	2.19	2.29	2.65	2.44	1.19	1.92	2.01	1.83	2.03	2.2	2.29	2.88	2.41	1.93	1.87	2.93	1.91	2.14	2.2	2.062	2.276	0.124506	0.118286
11.92	2.07	2.21	2.29	2.65	2.44	1.19	1.92	2.01	1.83	2.03	2.2	2.29	2.88	2.41	1.93	1.87	2.93	1.91	2.14	2.2	2.064	2.276	0.12475	0.118286
12	2.07	2.21	2.29	2.65	2.44	1.19	1.92	2.01	1.83	2.03	2.2	2.29	2.88	2.41	2.01	1.88	2.93	1.91	2.14	2.2	2.064	2.285	0.12475	0.11554
12.08	2.07	2.21	2.29	2.65	2.44	1.21	2.02	2.01	1.83	2.03	2.2	2.29	2.88	2.41	2.06	1.88	2.93	1.91	2.14	2.2	2.076	2.29	0.122286	0.114319
12.17	2.07	2.21	2.29	2.66	2.44	1.21	2.06	2.01	1.84	2.03	2.2	2.29	2.88	2.41	2.06	1.88	2.93	2	2.14	2.2	2.082	2.299	0.122445	0.11131
12.25	2.21	2.21	2.29	2.66	2.44	1.21	2.19	2.02	1.84	2.03	2.2	2.29	2.88	2.41	2.06	1.88	2.97	2	2.15	2.2	2.11	2.304	0.12327	0.113717
12.33	2.22	2.21	2.29	2.66	2.44	1.21	2.19	2.02	1.84	2.03	2.2	2.29	2.88	2.41	2.06	1.88	3.07	2	2.15	2.2	2.111	2.314	0.123364	0.120464
12.42	2.22	2.21	2.29	2.66	2.44	1.21	2.22	2.02	1.84	2.24	2.2	2.29	2.88	2.41	2.06	1.88	3.07	2	2.15	2.2	2.135	2.314	0.123812	0.120464
12.5	2.22	2.21	2.29	2.66	2.44	1.21	2.22	2.02	1.84	2.24	2.32	2.29	2.88	2.57	2.06	1.88	3.07	2	2.15	2.2	2.135	2.342	0.123812	0.122091
12.58	2.22	2.21	2.29	2.66	2.44	1.21	2.22	2.03	1.84	2.24	2.38	2.29	2.88	2.57	2.15	1.88	3.07	2	2.15	2.2	2.136	2.357	0.123713	0.120075
12.67	2.23	2.21	2.29	2.67	2.44	1.21	2.22	2.03	1.85	2.24	2.38	2.35	2.88	2.57	2.2	1.88	3.07	2	2.15	2.2	2.139	2.368	0.124002	0.118966
12.75	2.23	2.21	2.29	2.67	2.44	1.21	2.22	2.03	1.85	2.25	2.38	2.39	2.88	2.57	2.2	1.88	3.07	2	2.15	2.2	2.14	2.372	0.124097	0.118966
12.83	2.23	2.21	2.36	2.67	2.44	1.21	2.22	2.03	1.85	2.25	2.38	2.41	2.93	2.57	2.2	1.89	3.07	2	2.15	2.2	2.147	2.38	0.125229	0.121005
12.92	2.23	2.21	2.36	2.68	2.44	1.21	2.22	2.03	1.85	2.25	2.38	2.41	3.03	2.57	2.2	1.89	3.2	2	2.17	2.2	2.148	2.405	0.125696	0.134125
13	2.27	2.21	2.36	2.68	2.44	1.21	2.22	2.03	1.85	2.29	2.38	2.41	3.03	2.57	2.2	1.89	3.21	2	2.17	2.35	2.156	2.421	0.126458	0.133062
13.08	2.37	2.21	2.44	2.68	2.44	1.21	2.22	2.03	1.92	2.4	2.38	2.41	3.03	2.57	2.27	1.89	3.22	2.02	2.17	2.4	2.192	2.436	0.129175	0.131658
13.17	2.37	2.21	2.44	2.68	2.44	1.21	2.22	2.04	1.92	2.4	2.39	2.41	3.03	2.57	2.27	1.89	3.22	2.13	2.17	2.4	2.193	2.448	0.12904	0.128156
13.25	2.37	2.21	2.44	2.68	2.45	1.21	2.22	2.14	1.92	2.4	2.39	2.41	3.03	2.57	2.27	1.89	3.22	2.23	2.17	2.4	2.204	2.458	0.128316	0.125767
13.33	2.37	2.21	2.44	2.68	2.45	1.21	2.22	2.23	1.92	2.4	2.39	2.41	3.03	2.57	2.28	1.89	3.22	2.23	2.17	2.41	2.213	2.46	0.128132	0.125557
13.42	2.37	2.21	2.44	2.69	2.45	1.21	2.22	2.23	1.92	2.4	2.39	2.41	3.03	2.57	2.28	1.89	3.22	2.23	2.17	2.55	2.214	2.474	0.128541	0.125717
13.5	2.37	2.21	2.44	2.69	2.45	1.21	2.22	2.23	1.99	2.4	2.39	2.41	3.03	2.57	2.33	1.95	3.22	2.23	2.17	2.55	2.221	2.485	0.126942	0.121922
13.58	2.37	2.21	2.44	2.83	2.45	1.21	2.22	2.23	2.09	2.41	2.57	2.41	3.16	2.57	2.39	2.06	3.33	2.23	2.17	2.55	2.246	2.544	0.131759	0.129659
13.67	2.37	2.21	2.44	2.83	2.45	1.21	2.22	2.23	2.09	2.41	2.57	2.41	3.3	2.57	2.39	2.06	3.34	2.23	2.17	2.55	2.246	2.559	0.131759	0.13819
13.75	2.37	2.21	2.44	2.83	2.46	1.21	2.22	2.23	2.09	2.41	2.57	2.41	3.31	2.57	2.39	2.06	3.34	2.23	2.17	2.55	2.247	2.56	0.131935	0.138788
13.83	2.37	2.21	2.44	2.83	2.46	1.21	2.22	2.23	2.09	2.41	2.57	2.41	3.31	2.57	2.39	2.06	3.34	2.23	2.17	2.55	2.247	2.56	0.131935	0.138788
13.92	2.37	2.27	2.44	2.87	2.46	1.21	2.22	2.23	2.09	2.41	2.57	2.41	3.31	2.57	2.39	2.07	3.37	2.23	2.18	2.55	2.257	2.565	0.133874	0.139978
14	2.37	2.32	2.44	2.87	2.46	1.21	2.22	2.23	2.09	2.43	2.57	2.41	3.31	2.57	2.43	2.07	3.41	2.23	2.18	2.55	2.264	2.573	0.134282	0.142065
14.08	2.37	2.39	2.44	2.87	2.46	1.21	2.39	2.23	2.09	2.43	2.57	2.41	3.31	2.57	2.52	2.07	3.41	2.23	2.18	2.55	2.288	2.582	0.135144	0.141341
14.17	2.37	2.39	2.44	2.88	2.46	1.21	2.39	2.23	2.09	2.43	2.57	2.41	3.31	2.57	2.52	2.07	3.45	2.23	2.18	2.55	2.289	2.586	0.135626	0.143977
14.25	2.37	2.39	2.55	2.88	2.46	1.21	2.39	2.23	2.09	2.43	2.57	2.5	3.31	2.61	2.52	2.09	3.45	2.23	2.18	2.55	2.3	2.601	0.137421	0.142201
14.33	2.37	2.39	2.55	2.88	2.46	1.21	2.39	2.23	2.09	2.44	2.57	2.57	3.31	2.73	2.52	2.09	3.46	2.23	2.18	2.55	2.301	2.621	0.137529	0.142995
14.42	2.37	2.39	2.55	2.88	2.46	1.21	2.39	2.23	2.09	2.44	2.57	2.57	3.31	2.73	2.52	2.09	3.46	2.23	2.18	2.55	2.301	2.621	0.137529	0.142995
14.5	2.37	2.39	2.55	2.88	2.46	1.21	2.39	2.23	2.09	2.44	2.74	2.57	3.34	2.73	2.52	2.09	3.46	2.23	2.18	2.55	2.301	2.641	0.137529	0.144917
14.58	2.37	2.39	2.55	2.88	2.46	1.21	2.39	2.23	2.09	2.44	2.74	2.58	3.34	2.73	2.52	2.09	3.46	2.23	2.18	2.55	2.301	2.642	0.137529	0.144866
14.67	2.37	2.39	2.64	2.88	2.46	1.21	2.51	2.23	2.09	2.44	2.74	2.58	3.34	2.73	2.52	2.09	3.46	2.23	2.18	2.55	2.322	2.642	0.140892	0.144866
14.75	2.38	2.46	2.64	2.88	2.46	1.21	2.55	2.23	2.09	2.44	2.74	2.58	3.34	2.73	2.52	2.09	3.46	2.25	2.18	2.55	2.334	2.644	0.142097	0.144247
14.83	2.41	2.52	2.64	2.88	2.46	1.21	2.55	2.25	2.09	2.44	2.78	2.58	3.34	2.73	2.53	2.09	3.64	2.25	2.18	2.55	2.345	2.667	0.142776	0.156362
14.92	2.41	2.57	2.65	2.88	2.46	1.21	2.55	2.36	2.09	2.44	2.9	2.58	3.34	2.73	2.53	2.09	3.64	2.25	2.2	2.61	2.362	2.687	0.143332	0.156646
15	2.41	2.58	2.65	2.89	2.46	1.21	2.55	2.5	2.09	2.44	2.9	2.58	3.34	2.73	2.53	2.09	3.64	2.25	2.23	2.61	2.378	2.69	0.144536	0.155635
15.08	2.41	2.64	2.65	2.89	2.46	1.21	2.55	2.51	2.09	2.44	2.9	2.58	3.34	2.73	2.53	2.09	3.64	2.25	2.36	2.61	2.385	2.703	0.14568	0.151863
15.17	2.41	2.65	2.65	2.89	2.46	1.23	2.55	2.51	2.09	2.44	2.9	2.58	3.34	2.74	2.53	2.09	3.66	2.25	2.36	2.61	2.388	2.706	0.144089	0.153262
15.25	2.41	2.65	2.65	2.89	2.46	1.24	2.55	2.51	2.09	2.44	2.91	2.58	3.34	2.74	2.53	2.09	3.66	2.25	2.37	2.61	2.389	2.708	0.143197	0.153158
15.33	2.41	2.65	2.65	2.89	2.46	1.29	2.55	2.52	2.09	2.44	2.91	2.58	3.34	2.74	2.53	2.09	3.73	2.25	2.37	2.61	2.395	2.715	0.138854	0.158073
15.42	2.41	2.65	2.65	2.89	2.46	1.29	2.63	2.52	2.09	2.44	2.91	2.58	3.34	2.74	2.53	2.09	3.73	2.25	2.37	2.69	2.403	2.723	0.140072	0.157685
15.5	2.41	2.65	2.65	2.89	2.46	1.3	2.65	2.52	2.09	2.44	2.91	2.58	3.34	2.74	2.71	2.09	3.74	2.39	2.37	2.75	2.406	2.762	0.139564	0.152482
15.58	2.41	2.65	2.65	2.89	2.46	1.3	2.65	2.52	2.09	2.58	2.91	2.58	3.34	2.74	2.71	2.09	3.74	2.41	2.37	2.75	2.42	2.764	0.140641	0.151952
15.67	2.41	2.65	2.65	2.89	2.46	1.3	2.65	2.52	2.09	2.58	2.95	2.58	3.34	2.74	2.71	2.09	3.74	2.41	2.37	2.77	2.42	2.77	0.140641	0.152418
15.75	2.43	2.65	2.65	2.89	2.46	1.3	2.65	2.52	2.09	2.58	2.95	2.58	3.34	2.74	2.72	2.09	3.74	2.41	2.37	2.86	2.422	2.78	0.14064	0.152636
15.83	2.6	2.65	2.65	2.89	2.46	1.3	2.65	2.52	2.09	2.58	2.95	2.63	3.34	2.74	2.72	2.09	3.74	2.42	2.37	2.86	2.439	2.786	0.14177	0.151718
15.92	2.6	2.65	2.65	3	2.46	1.3	2.65	2.52	2.09	2.58	2.95	2.71	3.34	2.74	2.72	2.09	3.74	2.42	2.37	2.86	2.45	2.794	0.146021	0.151013
16	2.6	2.65	2.65	3.16	2.46	1.3	2.65	2.52	2.09	2.58	2.95	2.77	3.34	2.74	2.72	2.09	3.74	2.42	2.37	2.86	2.466	2.8	0.153407	0.150761
16.08	2.6	2.65	2.77	3.16	2.46	1.3	2.67	2.52	2.09	2.58	2.95	2.78	3.34	2.74	2.72	2.09	3.76	2.53	2.37	2.86	2.48	2.814	0.155721	0.14943
16.17	2.61	2.67	2.82	3.17	2.46	1.3	2.77	2.52	2.09	2.58	2.95	2.78	3.34	2.74	2.72	2.09	3.9	2.54	2.37	2.86	2.499	2.829	0.159223	0.159384
16.25	2.61	2.69	2.82	3.17	2.46	1.3	2.77	2.52	2.1	2.58	2.95	2.78	3.34	2.74	2.72	2.17	3.9	2.54	2.37	2.86	2.502	2.837	0.159191	0.155414
16.33	2.61	2.69	2.82	3.17	2.46	1.3	2.77	2.65	2.1	2.58	2.95	2.78	3.34	2.74	2.76	2.28	3.9	2.54	2.37	2.86	2.515	2.852	0.159884	0.150154
16.42	2.62	2.69	2.82	3.17	2.46	1.36	2.77	2.8	2.1	2.58	2.95	2.78	3.34	2.85	2.89	2.28	3.9	2.54	2.37	2.86	2.537	2.876	0.157007	0.149214
16.5	2.62	2.69	2.82	3.17	2.46	1.4	2.77	2.8	2.1	2.58	2.95	2.78	3.34	2.95	2.89	2.28	3.91	2.54	2.37	2.86	2.541	2.887	0.153691	0.150111
16.58	2.62	2.69	2.82	3.17	2.46	1.42	2.86	2.8	2.1	2.58	2.95	2.78	3.34	2.96	2.89	2.28	3.91	2.63	2.37	2.86	2.552	2.897	0.153795	0.148099
16.67	2.62	2.69	2.82	3.17	2.46	1.42	2.88	2.8	2.1	2.58	2.95	2.78	3.34	2.96	2.89	2.37	3.91	2.66	2.37	2.86	2.554	2.909	0.154252	0.143546
16.75	2.62	2.69	2.82	3.17	2.46	1.42	2.88	2.8	2.1	2.58	2.95	2.78	3.34	2.96	2.89	2.38	3.91	2.66	2.55	2.88	2.554	2.93	0.154252	0.136471
16.83	2.64	2.69	2.86	3.17	2.46	1.42	2.88	2.8	2.1	2.58	2.95	2.78	3.34	2.96	2.89	2.38	3.91	2.66	2.55	3.05	2.56	2.947	0.15517	0.136838
16.92	2.64	2.69	3	3.26	2.57	1.42	2.88	2.8	2.11	2.67	3.01	2.78	3.34	2.96	2.9	2.38	3.91	2.66	2.55	3.09	2.604	2.958	0.161996	0.137306
17	2.69	2.69	3	3.41	2.71	1.42	2.88	2.8	2.11	2.67	3.01	2.78	3.34	2.96	2.9	2.38	3.91	2.66	2.55	3.09	2.638	2.958	0.169501	0.137306
17.08	2.69	2.69	3	3.59	2.71	1.42	2.88	2.8	2.11	2.67	3.02	2.78	3.34	2.96	2.9	2.38	3.91	2.66	2.55	3.09	2.656	2.959	0.179284	0.137352
17.17	2.71	2.69	3	3.6	2.71	1.42	2.92	2.8	2.11	2.67	3.02	2.78	3.34	2.96	2.9	2.38	3.97	2.66	2.55	3.09	2.663	2.965	0.180506	0.142019
17.25	2.71	2.69	3	3.6	2.71	1.42	3.02	2.8	2.11	2.67	3.02	2.78	3.34	3.01	3.03	2.38	4.03	2.66	2.55	3.12	2.673	2.992	0.182355	0.146915
17.33	2.71	2.69	3	3.6	2.71	1.42	3.02	2.8	2.23	2.83	3.02	2.78	3.34	3.14	3.13	2.38	4.03	2.74	2.55	3.12	2.701	3.023	0.179161	0.146265
17.42	2.71	2.69	3	3.6	2.71	1.42	3.02	3.06	2.26	2.83	3.02	2.78	3.34	3.14	3.13	2.38	4.04	2.77	2.55	3.12	2.73	3.027	0.181726	0.146417
17.5	2.71	2.69	3	3.71	2.71	1.42	3.02	3.07	2.26	2.83	3.02	2.78	3.34	3.14	3.13	2.38	4.05	2.77	2.65	3.12	2.742	3.038	0.188	0.143881
17.58	2.71	2.69	3	3.9	2.71	1.42	3.03	3.07	2.26	2.83	3.02	2.78	3.34	3.14	3.13	2.38	4.05	2.77	2.65	3.12	2.762	3.038	0.199626	0.143881
17.67	2.71	2.69	3	3.9	2.71	1.42	3.03	3.07	2.26	2.83	3.02	2.78	3.34	3.14	3.13	2.38	4.05	2.77	2.65	3.12	2.762	3.038	0.199626	0.143881
17.75	2.71	2.69	3	3.9	2.71	1.42	3.03	3.07	2.26	2.83	3.02	2.78	3.34	3.14	3.13	2.38	4.05	2.77	2.65	3.12	2.762	3.038	0.199626	0.143881
17.83	2.72	2.69	3	3.9	2.71	1.42	3.03	3.07	2.35	2.83	3.02	2.78	3.34	3.14	3.13	2.38	4.05	2.77	2.65	3.12	2.772	3.038	0.197269	0.143881
17.92	2.72	2.69	3	3.9	2.71	1.42	3.03	3.07	2.51	2.83	3.02	2.78	3.34	3.14	3.13	2.38	4.05	2.77	2.65	3.12	2.788	3.038	0.194089	0.143881
18	2.72	2.69	3.01	3.9	2.71	1.42	3.03	3.07	2.51	2.83	3.02	2.78	3.34	3.14	3.13	2.38	4.05	2.77	2.65	3.12	2.789	3.038	0.194213	0.143881
18.08	2.72	2.69	3.16	3.9	2.71	1.42	3.03	3.07	2.51	2.83	3.05	2.78	3.35	3.14	3.14	2.38	4.05	2.87	2.65	3.12	2.804	3.053	0.196673	0.142408
18.17	2.72	2.69	3.16	3.9	2.71	1.42	3.04	3.07	2.51	2.83	3.05	2.78	3.57	3.14	3.14	2.38	4.05	3	2.65	3.16	2.805	3.092	0.196804	0.147775
18.25	2.72	2.69	3.16	3.9	2.86	1.42	3.04	3.07	2.51	2.83	3.05	2.78	3.63	3.14	3.14	2.41	4.05	3	2.66	3.16	2.82	3.102	0.196571	0.148128
18.33	2.87	2.69	3.16	3.9	2.96	1.44	3.04	3.07	2.52	2.83	3.05	2.78	3.63	3.26	3.14	2.41	4.05	3	2.66	3.16	2.848	3.114	0.194895	0.148953
18.42	2.93	2.7	3.16	3.9	2.96	1.46	3.04	3.07	2.52	2.83	3.05	2.78	3.63	3.26	3.14	2.41	4.05	3	2.66	3.16	2.857	3.114	0.193362	0.148953
18.5	2.93	2.7	3.16	3.9	2.96	1.46	3.04	3.07	2.52	2.83	3.05	2.78	3.63	3.26	3.14	2.41	4.05	3	2.67	3.24	2.857	3.123	0.193362	0.149101
18.58	2.93	2.7	3.16	3.9	2.96	1.46	3.04	3.07	2.52	2.83	3.05	2.85	3.63	3.26	3.14	2.41	4.05	3	2.67	3.24	2.857	3.13	0.193362	0.147468
18.67	2.93	2.7	3.16	3.9	2.96	1.52	3.04	3.07	2.52	2.92	3.05	3.06	3.63	3.26	3.14	2.41	4.05	3	2.77	3.24	2.872	3.161	0.18862	0.14111
18.75	2.93	2.7	3.16	3.9	2.96	1.54	3.04	3.07	2.52	2.92	3.05	3.06	3.63	3.26	3.14	2.41	4.05	3.01	2.78	3.25	2.874	3.164	0.187031	0.140746
18.83	2.93	2.7	3.16	3.91	2.97	1.54	3.04	3.07	2.52	2.92	3.05	3.06	3.63	3.26	3.14	2.41	4.05	3.01	2.78	3.25	2.876	3.164	0.187695	0.140746
18.92	2.93	2.7	3.16	3.91	2.97	1.54	3.04	3.07	2.52	2.92	3.05	3.06	3.63	3.26	3.14	2.41	4.05	3.01	2.78	3.25	2.876	3.164	0.187695	0.140746
19	2.93	2.7	3.18	3.91	2.97	1.54	3.04	3.07	2.52	2.92	3.05	3.06	3.63	3.26	3.14	2.41	4.05	3.01	2.78	3.25	2.878	3.164	0.188041	0.140746
19.08	2.93	2.7	3.18	3.91	2.97	1.54	3.04	3.08	2.52	2.92	3.05	3.06	3.63	3.26	3.14	2.41	4.05	3.01	2.78	3.25	2.879	3.164	0.188157	0.140746
19.17	2.93	2.7	3.18	3.91	2.97	1.54	3.04	3.08	2.52	2.92	3.05	3.06	3.63	3.26	3.14	2.48	4.05	3.01	2.78	3.25	2.879	3.171	0.188157	0.136695
19.25	2.93	2.7	3.18	3.91	2.97	1.54	3.04	3.09	2.52	2.92	3.05	3.06	3.63	3.26	3.14	2.57	4.05	3.01	2.78	3.25	2.88	3.18	0.188279	0.13185
19.33	2.93	2.7	3.18	3.91	2.97	1.54	3.04	3.09	2.52	2.92	3.05	3.06	3.63	3.26	3.16	2.57	4.05	3.01	2.78	3.25	2.88	3.182	0.188279	0.131798
19.42	2.93	2.7	3.18	3.91	2.97	1.54	3.04	3.09	2.52	2.92	3.05	3.06	3.63	3.26	3.16	2.57	4.05	3.01	2.78	3.25	2.88	3.182	0.188279	0.131798
19.5	2.93	2.7	3.18	3.91	2.97	1.54	3.04	3.09	2.52	2.92	3.05	3.06	3.63	3.26	3.16	2.57	4.05	3.01	2.78	3.25	2.88	3.182	0.188279	0.131798
19.58	2.93	2.7	3.18	3.91	2.97	1.54	3.04	3.1	2.52	2.92	3.05	3.06	3.63	3.38	3.16	2.59	4.05	3.01	2.78	3.25	2.881	3.196	0.188405	0.132096
19.67	2.93	2.7	3.19	3.91	2.97	1.54	3.05	3.1	2.52	2.92	3.05	3.06	3.63	3.46	3.16	2.59	4.05	3.01	2.78	3.25	2.883	3.204	0.18868	0.133568
19.75	2.93	2.7	3.19	3.91	2.97	1.54	3.05	3.1	2.52	2.92	3.05	3.06	3.63	3.46	3.3	2.59	4.05	3.08	2.78	3.25	2.883	3.225	0.18868	0.132759
19.83	2.93	2.7	3.19	3.91	2.97	1.54	3.05	3.1	2.53	2.92	3.05	3.06	3.63	3.46	3.3	2.59	4.07	3.17	2.78	3.25	2.884	3.236	0.188469	0.133352
19.92	2.93	2.7	3.19	3.91	2.97	1.54	3.05	3.1	2.53	3.01	3.05	3.06	3.63	3.46	3.3	2.59	4.07	3.17	2.78	3.25	2.893	3.236	0.188874	0.133352
20	2.93	2.7	3.19	3.91	2.97	1.54	3.05	3.1	2.53	3.11	3.05	3.06	3.63	3.46	3.3	2.59	4.07	3.17	2.79	3.25	2.903	3.237	0.189825	0.132975
20.08	2.93	2.7	3.19	3.91	2.97	1.54	3.05	3.1	2.53	3.12	3.05	3.06	3.63	3.46	3.3	2.59	4.07	3.17	2.79	3.25	2.904	3.237	0.189949	0.132975
20.17	2.93	2.7	3.19	3.91	2.97	1.54	3.05	3.1	2.53	3.12	3.05	3.06	3.63	3.46	3.3	2.59	4.07	3.17	2.79	3.25	2.904	3.237	0.189949	0.132975
20.25	2.93	2.7	3.19	3.91	2.97	1.54	3.05	3.1	2.53	3.13	3.05	3.06	3.63	3.46	3.3	2.59	4.07	3.17	2.79	3.25	2.905	3.237	0.190077	0.132975
20.33	2.93	2.7	3.19	3.91	2.98	1.54	3.05	3.1	2.53	3.13	3.05	3.06	3.63	3.46	3.3	2.59	4.07	3.17	2.79	3.25	2.906	3.237	0.190118	0.132975
20.42	2.95	2.7	3.21	3.91	3.06	1.54	3.05	3.1	2.53	3.13	3.05	3.06	3.63	3.46	3.3	2.59	4.12	3.17	2.79	3.25	2.918	3.242	0.19099	0.136502
20.5	3	2.7	3.36	3.91	3.06	1.54	3.05	3.1	2.53	3.13	3.05	3.06	3.63	3.46	3.31	2.59	4.17	3.18	2.79	3.25	2.938	3.249	0.194215	0.140107
20.58	3.01	2.72	3.36	3.91	3.06	1.54	3.05	3.1	2.53	3.13	3.05	3.06	3.63	3.46	3.31	2.59	4.17	3.18	2.82	3.27	2.941	3.254	0.19399	0.139054
20.67	3.01	2.81	3.36	3.91	3.06	1.54	3.05	3.1	2.53	3.13	3.05	3.06	3.63	3.46	3.31	2.59	4.17	3.18	2.82	3.38	2.95	3.265	0.193057	0.139628
20.75	3.01	2.81	3.36	3.91	3.06	1.54	3.05	3.1	2.53	3.13	3.05	3.08	3.63	3.46	3.31	2.59	4.17	3.18	2.91	3.38	2.95	3.276	0.193057	0.136367
20.83	3.01	2.81	3.36	3.91	3.06	1.54	3.05	3.1	2.54	3.13	3.05	3.08	3.63	3.46	3.31	2.59	4.17	3.18	2.91	3.38	2.951	3.276	0.192818	0.136367
20.92	3.01	2.81	3.36	3.91	3.06	1.54	3.06	3.1	2.54	3.13	3.05	3.08	3.63	3.47	3.31	2.59	4.17	3.19	2.91	3.38	2.952	3.278	0.192878	0.136445
21	3.01	2.81	3.36	3.91	3.06	1.54	3.06	3.1	2.54	3.13	3.05	3.08	3.63	3.47	3.31	2.59	4.17	3.19	2.91	3.38	2.952	3.278	0.192878	0.136445
21.08	3.01	2.81	3.36	3.91	3.06	1.54	3.06	3.1	2.69	3.13	3.05	3.08	3.63	3.47	3.31	2.63	4.17	3.19	2.91	3.38	2.967	3.282	0.189877	0.134245
21.17	3.01	2.81	3.36	3.91	3.06	1.54	3.06	3.1	2.77	3.13	3.05	3.08	3.63	3.47	3.31	2.63	4.17	3.19	2.91	3.38	2.975	3.282	0.188746	0.134245
21.25	3.01	2.81	3.36	3.91	3.06	1.54	3.06	3.1	2.77	3.13	3.05	3.08	3.63	3.47	3.31	2.63	4.17	3.19	2.91	3.38	2.975	3.282	0.188746	0.134245
21.33	3.01	2.81	3.36	3.91	3.06	1.54	3.06	3.1	2.78	3.13	3.05	3.08	3.63	3.47	3.31	2.63	4.17	3.19	2.91	3.38	2.976	3.282	0.188628	0.134245
21.42	3.01	2.81	3.36	3.95	3.06	1.54	3.06	3.1	2.78	3.13	3.05	3.08	3.63	3.47	3.31	2.63	4.17	3.19	2.91	3.41	2.98	3.285	0.190858	0.134522
21.5	3.01	2.81	3.36	3.95	3.06	1.54	3.06	3.1	2.78	3.13	3.05	3.08	3.63	3.47	3.31	2.63	4.17	3.19	2.91	3.52	2.98	3.296	0.190858	0.136098
21.58	3.01	2.81	3.36	3.95	3.06	1.54	3.06	3.1	2.78	3.13	3.05	3.08	3.63	3.47	3.31	2.63	4.17	3.2	2.91	3.53	2.98	3.298	0.190858	0.136201
21.67	3.01	2.81	3.36	3.95	3.06	1.54	3.06	3.1	2.78	3.22	3.05	3.08	3.63	3.52	3.31	2.63	4.17	3.2	2.91	3.53	2.989	3.303	0.191853	0.136992
21.75	3.01	2.81	3.36	3.95	3.06	1.69	3.06	3.1	2.78	3.22	3.05	3.08	3.63	3.64	3.31	2.63	4.17	3.2	2.91	3.53	3.004	3.315	0.179451	0.139605
21.83	3.01	2.81	3.36	3.95	3.06	1.86	3.06	3.1	2.78	3.22	3.05	3.09	3.63	3.65	3.31	2.63	4.19	3.2	2.91	3.53	3.021	3.319	0.165915	0.141047
21.92	3.01	2.81	3.36	3.95	3.06	1.9	3.06	3.1	2.78	3.22	3.05	3.22	3.63	3.65	3.31	2.63	4.19	3.27	2.91	3.53	3.025	3.339	0.162824	0.138728
22	3.01	2.81	3.36	3.95	3.06	1.91	3.06	3.1	2.78	3.22	3.05	3.26	3.63	3.65	3.37	2.63	4.19	3.27	2.91	3.53	3.026	3.349	0.162058	0.138375
22.08	3.01	2.81	3.36	3.95	3.06	1.91	3.09	3.1	2.78	3.22	3.05	3.26	3.63	3.65	3.44	2.63	4.19	3.27	2.91	3.53	3.029	3.356	0.162155	0.13867
22.17	3.01	2.81	3.36	3.95	3.06	2.09	3.24	3.1	2.78	3.22	3.05	3.26	3.63	3.65	3.44	2.63	4.19	3.27	2.91	3.53	3.062	3.356	0.150036	0.13867
22.25	3.01	2.81	3.44	3.95	3.06	2.1	3.25	3.1	2.78	3.22	3.05	3.26	3.63	3.65	3.45	2.63	4.19	3.27	2.91	3.53	3.072	3.357	0.151414	0.138741
22.33	3.01	2.81	3.52	3.95	3.06	2.1	3.25	3.1	2.78	3.22	3.05	3.26	3.63	3.65	3.45	2.63	4.19	3.27	2.91	3.53	3.08	3.357	0.153768	0.138741
22.42	3.01	2.81	3.52	3.95	3.06	2.11	3.25	3.1	2.78	3.22	3.05	3.26	3.63	3.65	3.45	2.63	4.19	3.27	2.91	3.53	3.081	3.357	0.153061	0.138741
22.5	3.01	2.81	3.52	3.95	3.06	2.11	3.25	3.1	2.78	3.22	3.05	3.26	3.63	3.65	3.45	2.63	4.19	3.27	2.91	3.53	3.081	3.357	0.153061	0.138741
22.58	3.01	2.81	3.52	3.95	3.06	2.2	3.25	3.1	2.78	3.22	3.05	3.26	3.63	3.65	3.45	2.63	4.19	3.27	2.92	3.54	3.09	3.359	0.146856	0.138528
22.67	3.02	2.81	3.52	3.95	3.06	2.21	3.25	3.1	2.78	3.22	3.05	3.26	3.63	3.65	3.45	2.63	4.19	3.27	2.95	3.6	3.092	3.368	0.146126	0.13849
22.75	3.02	2.81	3.52	3.95	3.06	2.21	3.25	3.1	2.78	3.23	3.05	3.26	3.63	3.65	3.45	2.63	4.19	3.27	3.02	3.6	3.093	3.375	0.146227	0.136302
22.83	3.02	2.81	3.52	3.95	3.06	2.21	3.25	3.1	2.78	3.23	3.05	3.26	3.63	3.68	3.45	2.65	4.19	3.27	3.03	3.6	3.093	3.381	0.146227	0.135511
22.92	3.03	2.81	3.52	3.95	3.06	2.21	3.25	3.1	2.78	3.23	3.05	3.26	3.63	3.68	3.45	2.65	4.19	3.27	3.03	3.6	3.094	3.381	0.146175	0.135511
23	3.04	2.81	3.52	3.95	3.06	2.3	3.25	3.1	2.85	3.23	3.05	3.26	3.63	3.68	3.45	2.65	4.19	3.27	3.03	3.6	3.111	3.381	0.1386	0.135511
23.08	3.04	2.81	3.52	3.95	3.23	2.36	3.26	3.1	2.86	3.23	3.05	3.26	3.63	3.68	3.45	2.65	4.19	3.27	3.03	3.6	3.136	3.381	0.134917	0.135511
23.17	3.04	2.81	3.52	3.95	3.23	2.36	3.26	3.1	2.86	3.23	3.07	3.26	3.63	3.68	3.45	2.65	4.2	3.27	3.03	3.6	3.136	3.384	0.134917	0.135648
23.25	3.04	2.81	3.52	3.95	3.23	2.36	3.26	3.1	2.86	3.23	3.07	3.26	3.63	3.68	3.58	2.65	4.32	3.27	3.03	3.6	3.136	3.409	0.134917	0.14507
23.33	3.04	2.81	3.52	3.95	3.23	2.36	3.26	3.15	2.86	3.23	3.07	3.26	3.63	3.68	3.58	2.65	4.37	3.27	3.03	3.6	3.141	3.414	0.134862	0.148602
23.42	3.04	2.81	3.52	3.95	3.23	2.36	3.38	3.15	2.86	3.23	3.07	3.26	3.63	3.68	3.58	2.65	4.38	3.27	3.03	3.6	3.153	3.415	0.136561	0.149319
23.5	3.04	2.81	3.52	3.95	3.23	2.36	3.39	3.15	2.86	3.23	3.07	3.26	3.63	3.68	3.58	2.65	4.38	3.27	3.03	3.6	3.154	3.415	0.13675	0.149319
23.58	3.04	2.81	3.61	3.95	3.23	2.36	3.39	3.15	2.86	3.23	3.07	3.26	3.63	3.68	3.58	2.65	4.38	3.27	3.03	3.6	3.163	3.415	0.139691	0.149319
23.67	3.04	2.81	3.65	3.95	3.23	2.37	3.39	3.15	2.86	3.23	3.07	3.26	3.63	3.68	3.58	2.65	4.38	3.27	3.03	3.6	3.168	3.415	0.140529	0.149319
23.75	3.04	2.81	3.65	3.95	3.23	2.37	3.39	3.15	2.86	3.23	3.07	3.26	3.63	3.76	3.58	2.65	4.38	3.28	3.03	3.6	3.168	3.424	0.140529	0.150991
23.83	3.04	2.81	3.65	3.95	3.23	2.37	3.39	3.15	2.86	3.23	3.07	3.26	3.63	3.8	3.58	2.65	4.38	3.28	3.03	3.6	3.168	3.428	0.140529	0.152029
23.92	3.04	2.81	3.65	3.95	3.23	2.37	3.39	3.15	2.87	3.23	3.07	3.26	3.63	3.8	3.58	2.65	4.38	3.28	3.03	3.6	3.169	3.428	0.140289	0.152029
24	3.04	2.81	3.65	3.95	3.23	2.37	3.39	3.15	2.87	3.23	3.07	3.26	3.63	3.8	3.58	2.65	4.38	3.28	3.03	3.6	3.169	3.428	0.140289	0.152029
24.08	3.04	2.81	3.65	3.95	3.23	2.37	3.39	3.15	2.88	3.24	3.07	3.26	3.63	3.8	3.58	2.65	4.38	3.28	3.03	3.6	3.171	3.428	0.140107	0.152029
24.17	3.04	2.81	3.65	3.95	3.23	2.37	3.4	3.15	2.9	3.24	3.07	3.26	3.63	3.8	3.63	2.65	4.38	3.28	3.04	3.6	3.174	3.434	0.139835	0.152375
24.25	3.04	2.81	3.65	3.95	3.23	2.38	3.4	3.15	2.9	3.24	3.12	3.26	3.63	3.8	3.64	2.65	4.38	3.28	3.04	3.6	3.175	3.44	0.139198	0.151269
24.33	3.04	2.81	3.65	3.95	3.23	2.44	3.4	3.15	2.9	3.29	3.27	3.26	3.63	3.81	3.64	2.65	4.38	3.29	3.04	3.6	3.186	3.457	0.135804	0.148594
24.42	3.04	2.81	3.65	3.95	3.23	2.5	3.4	3.15	2.9	3.36	3.27	3.26	3.64	3.81	3.64	2.65	4.38	3.35	3.04	3.6	3.199	3.464	0.132987	0.148093
24.5	3.04	2.81	3.65	3.95	3.23	2.5	3.4	3.2	2.9	3.36	3.27	3.26	3.64	3.81	3.64	2.65	4.38	3.41	3.04	3.62	3.204	3.472	0.132876	0.14791
24.58	3.04	2.81	3.65	3.95	3.23	2.5	3.4	3.26	2.9	3.36	3.27	3.26	3.64	3.81	3.64	2.69	4.38	3.41	3.04	3.64	3.21	3.478	0.132991	0.145707
24.67	3.04	2.81	3.65	3.95	3.23	2.5	3.4	3.26	2.9	3.36	3.27	3.26	3.64	3.81	3.64	2.79	4.38	3.41	3.04	3.64	3.21	3.488	0.132991	0.139927
24.75	3.04	2.81	3.65	3.95	3.23	2.5	3.4	3.26	2.9	3.36	3.27	3.26	3.64	3.81	3.64	2.79	4.38	3.41	3.04	3.64	3.21	3.488	0.132991	0.139927
24.83	3.04	2.81	3.67	3.95	3.23	2.5	3.4	3.26	2.9	3.36	3.27	3.26	3.64	3.81	3.64	2.79	4.38	3.41	3.04	3.64	3.212	3.488	0.133739	0.139927
24.92	3.04	2.81	3.7	3.95	3.23	2.5	3.4	3.26	2.9	3.36	3.27	3.26	3.64	3.81	3.64	2.8	4.38	3.41	3.04	3.64	3.215	3.489	0.134909	0.139375
25	3.04	2.81	4	3.95	3.23	2.51	3.4	3.26	2.9	3.36	3.27	3.26	3.64	3.88	3.64	2.8	4.38	3.41	3.04	3.64	3.246	3.496	0.148894	0.141329
25.08	3.04	2.81	4	3.95	3.23	2.51	3.5	3.26	2.9	3.36	3.27	3.26	3.64	3.93	3.64	2.8	4.42	3.41	3.04	3.64	3.256	3.505	0.150371	0.14568
25.17	3.04	2.81	4	3.95	3.23	2.51	3.6	3.26	2.9	3.36	3.27	3.26	3.64	3.93	3.69	2.8	4.42	3.41	3.04	3.64	3.266	3.51	0.152492	0.14628
25.25	3.04	2.81	4	3.95	3.23	2.51	3.6	3.26	2.9	3.36	3.27	3.26	3.64	3.93	3.76	2.8	4.42	3.41	3.05	3.64	3.266	3.518	0.152492	0.147043
25.33	3.04	2.81	4	3.95	3.23	2.51	3.6	3.26	2.9	3.36	3.27	3.26	3.64	3.93	3.76	2.8	4.42	3.41	3.05	3.64	3.266	3.518	0.152492	0.147043
25.42	3.04	2.81	4	3.95	3.23	2.51	3.6	3.26	2.9	3.36	3.27	3.26	3.64	3.93	3.76	2.8	4.42	3.41	3.05	3.64	3.266	3.518	0.152492	0.147043
25.5	3.04	2.81	4.01	3.95	3.23	2.6	3.6	3.26	2.9	3.36	3.27	3.26	3.64	3.93	3.76	2.8	4.42	3.41	3.05	3.64	3.276	3.518	0.148273	0.147043
25.58	3.04	2.81	4.01	3.95	3.23	2.6	3.6	3.26	2.9	3.36	3.27	3.26	3.64	3.93	3.76	2.8	4.42	3.41	3.06	3.64	3.276	3.519	0.148273	0.146693
25.67	3.04	2.81	4.01	3.95	3.23	2.6	3.6	3.26	2.9	3.52	3.27	3.27	3.64	3.93	3.76	2.8	4.42	3.41	3.06	3.64	3.292	3.52	0.150132	0.1465
25.75	3.04	2.81	4.01	3.95	3.23	2.6	3.6	3.26	2.9	3.62	3.27	3.27	3.64	3.93	3.76	2.8	4.42	3.41	3.06	3.64	3.302	3.52	0.152139	0.1465
25.83	3.04	2.81	4.01	3.95	3.23	2.6	3.6	3.26	2.9	3.63	3.27	3.27	3.64	3.93	3.76	2.81	4.42	3.41	3.06	3.64	3.303	3.521	0.152374	0.145956
25.92	3.04	2.81	4.01	3.95	3.23	2.6	3.6	3.27	2.9	3.63	3.27	3.27	3.64	3.93	3.76	2.81	4.42	3.41	3.06	3.64	3.304	3.521	0.152346	0.145956
26	3.04	2.81	4.01	3.95	3.23	2.6	3.6	3.27	2.9	3.63	3.27	3.27	3.64	3.93	3.76	2.81	4.42	3.41	3.06	3.64	3.304	3.521	0.152346	0.145956
26.08	3.04	2.81	4.01	3.95	3.23	2.6	3.6	3.27	2.9	3.63	3.27	3.27	3.64	3.93	3.76	2.81	4.42	3.42	3.06	3.64	3.304	3.522	0.152346	0.145875
26.17	3.04	2.81	4.01	3.95	3.23	2.6	3.6	3.27	2.9	3.63	3.27	3.39	3.67	3.96	3.76	2.81	4.42	3.42	3.06	3.64	3.304	3.54	0.152346	0.145266
26.25	3.04	2.81	4.01	3.95	3.23	2.6	3.6	3.27	2.9	3.63	3.27	3.44	3.84	3.96	3.76	2.81	4.48	3.42	3.06	3.64	3.304	3.568	0.152346	0.151333
26.33	3.04	2.81	4.01	3.95	3.23	2.6	3.67	3.3	2.9	3.63	3.27	3.47	3.84	3.96	3.76	2.81	4.48	3.42	3.06	3.64	3.314	3.571	0.153949	0.151081
26.42	3.04	2.81	4.01	3.95	3.23	2.6	3.82	3.38	2.9	3.63	3.27	3.47	3.84	3.97	3.76	2.81	4.49	3.42	3.06	3.64	3.337	3.573	0.158507	0.152038
26.5	3.04	2.81	4.01	3.95	3.23	2.6	3.83	3.53	2.9	3.63	3.27	3.47	3.84	3.97	3.76	2.81	4.49	3.46	3.06	3.64	3.353	3.577	0.159993	0.151643
26.58	3.04	2.81	4.01	3.95	3.23	2.6	3.83	3.61	2.9	3.63	3.27	3.47	3.84	3.97	3.76	2.81	4.49	3.57	3.06	3.78	3.361	3.602	0.161172	0.152278
26.67	3.04	2.81	4.01	3.95	3.23	2.6	3.83	3.61	2.9	3.63	3.27	3.47	3.84	3.97	3.76	2.81	4.49	3.57	3.06	3.78	3.361	3.602	0.161172	0.152278
26.75	3.06	2.81	4.01	3.95	3.38	2.6	3.83	3.61	2.9	3.63	3.27	3.47	3.84	3.97	3.87	2.81	4.49	3.57	3.06	3.81	3.378	3.616	0.160061	0.154324
26.83	3.06	2.81	4.01	3.96	3.39	2.6	3.83	3.61	2.9	3.63	3.27	3.47	3.84	4.07	3.88	2.81	4.49	3.57	3.06	3.81	3.38	3.627	0.160465	0.157346
26.92	3.06	2.81	4.01	3.96	3.39	2.6	3.83	3.61	2.9	3.63	3.27	3.47	3.84	4.09	3.88	2.81	4.49	3.59	3.06	3.81	3.38	3.631	0.160465	0.157913
27	3.06	2.81	4.01	4.01	3.39	2.6	3.83	3.61	2.9	3.63	3.27	3.47	3.84	4.09	3.88	2.81	4.49	3.59	3.06	3.81	3.385	3.631	0.162537	0.157913
27.08	3.06	2.81	4.01	4.1	3.39	2.6	3.83	3.61	2.9	3.63	3.27	3.47	3.84	4.09	3.88	2.81	4.49	3.59	3.06	3.81	3.394	3.631	0.166581	0.157913
27.17	3.06	2.81	4.01	4.1	3.39	2.6	3.83	3.62	2.9	3.63	3.27	3.47	3.84	4.09	3.88	2.83	4.49	3.59	3.06	3.81	3.395	3.633	0.166728	0.156766
27.25	3.06	2.81	4.01	4.1	3.39	2.6	3.83	3.62	2.9	3.63	3.27	3.47	3.84	4.09	3.88	2.83	4.49	3.59	3.06	3.81	3.395	3.633	0.166728	0.156766
27.33	3.06	2.81	4.01	4.1	3.39	2.66	3.83	3.62	2.9	3.64	3.27	3.47	3.84	4.09	3.88	2.83	4.49	3.59	3.06	3.81	3.402	3.633	0.163787	0.156766
27.42	3.06	2.81	4.01	4.1	3.39	2.75	3.83	3.62	2.9	3.64	3.27	3.47	3.84	4.09	3.88	2.83	4.5	3.59	3.06	3.81	3.411	3.634	0.159447	0.157376
27.5	3.06	2.81	4.01	4.11	3.39	2.82	3.83	3.62	2.9	3.64	3.27	3.47	3.93	4.09	3.88	2.83	4.5	3.59	3.06	3.81	3.419	3.643	0.156833	0.158934
27.58	3.06	2.81	4.01	4.18	3.39	2.83	3.83	3.63	2.9	3.64	3.27	3.47	4	4.09	3.88	2.83	4.5	3.59	3.06	3.81	3.428	3.65	0.160096	0.160485
27.67	3.06	2.81	4.01	4.18	3.39	2.83	3.83	3.63	2.9	3.64	3.27	3.47	4	4.09	3.88	2.83	4.5	3.59	3.06	3.81	3.428	3.65	0.160096	0.160485
27.75	3.06	2.85	4.01	4.18	3.39	2.83	3.83	3.73	2.9	3.64	3.27	3.48	4	4.09	3.88	2.83	4.5	3.59	3.07	3.81	3.442	3.652	0.160117	0.159957
27.83	3.09	2.85	4.01	4.18	3.39	2.89	3.83	3.85	2.9	3.64	3.27	3.64	4	4.09	3.88	2.87	4.5	3.59	3.09	3.81	3.463	3.674	0.159674	0.155686
27.92	3.18	2.85	4.01	4.18	3.39	2.89	3.83	3.85	2.9	3.64	3.27	3.71	4	4.09	3.88	2.87	4.62	3.59	3.1	3.81	3.472	3.694	0.157577	0.162571
28	3.24	2.85	4.02	4.18	3.39	2.9	3.83	3.85	2.9	3.64	3.27	3.72	4	4.17	3.91	2.95	4.62	3.59	3.14	3.81	3.48	3.718	0.156418	0.159296
28.08	3.24	2.85	4.02	4.18	3.4	2.9	3.84	3.86	2.9	3.64	3.27	3.74	4	4.24	4	2.95	4.62	3.59	3.43	3.81	3.483	3.765	0.156873	0.153545
28.17	3.24	2.88	4.02	4.18	3.42	2.9	3.84	3.86	2.9	3.64	3.27	3.74	4	4.24	4.01	2.95	4.63	3.59	3.43	3.81	3.488	3.767	0.155441	0.154338
28.25	3.24	2.88	4.02	4.18	3.42	2.9	3.84	3.86	2.92	3.64	3.27	3.74	4	4.24	4.01	2.95	4.63	3.59	3.43	3.81	3.49	3.767	0.154611	0.154338
28.33	3.24	2.88	4.02	4.18	3.42	2.9	3.84	3.86	2.99	3.64	3.27	3.74	4	4.24	4.01	2.95	4.63	3.59	3.43	3.92	3.497	3.778	0.151878	0.155068
28.42	3.24	2.88	4.02	4.38	3.42	2.9	3.84	3.86	3.11	3.64	3.27	3.74	4	4.24	4.01	2.95	4.63	3.59	3.43	3.92	3.529	3.778	0.158874	0.155068
28.5	3.24	2.88	4.02	4.38	3.42	2.9	3.84	3.86	3.14	3.64	3.27	3.74	4	4.24	4.02	2.95	4.63	3.59	3.43	3.92	3.532	3.779	0.158021	0.155238
28.58	3.24	2.88	4.04	4.38	3.42	2.9	3.84	3.86	3.14	3.64	3.27	3.74	4	4.24	4.02	2.95	4.63	3.77	3.43	3.92	3.534	3.797	0.158718	0.15384
28.67	3.25	2.88	4.04	4.38	3.42	2.9	3.84	3.86	3.14	3.64	3.27	3.74	4	4.25	4.02	2.95	4.63	3.78	3.43	3.92	3.535	3.799	0.158516	0.154146
28.75	3.31	2.88	4.04	4.38	3.42	2.9	3.84	3.86	3.14	3.64	3.27	3.74	4	4.25	4.02	2.96	4.63	3.78	3.43	3.92	3.541	3.8	0.157427	0.153536
28.83	3.35	2.88	4.08	4.38	3.42	2.9	3.84	3.86	3.14	3.64	3.27	3.74	4	4.25	4.02	2.96	4.66	3.78	3.44	3.93	3.549	3.805	0.158272	0.155179
28.92	3.35	2.88	4.21	4.38	3.42	2.9	3.85	3.86	3.14	3.64	3.27	3.74	4	4.25	4.02	2.96	4.77	3.78	3.44	3.93	3.563	3.816	0.163755	0.162147
29	3.35	3.04	4.42	4.38	3.42	2.9	3.85	3.86	3.14	3.64	3.27	3.74	4	4.25	4.2	2.96	4.78	3.78	3.44	3.93	3.6	3.835	0.167418	0.166254
29.08	3.35	3.04	4.42	4.38	3.42	2.9	3.85	3.86	3.14	3.64	3.27	3.74	4	4.25	4.21	2.96	4.78	3.78	3.44	3.93	3.6	3.836	0.167418	0.166501
29.17	3.35	3.04	4.42	4.38	3.42	2.9	3.85	3.86	3.14	3.64	3.27	3.83	4	4.25	4.21	2.96	4.78	3.78	3.44	3.93	3.6	3.845	0.167418	0.166168
29.25	3.35	3.04	4.42	4.38	3.42	2.9	3.85	3.86	3.14	3.64	3.27	3.83	4	4.25	4.21	2.96	4.78	3.78	3.44	3.93	3.6	3.845	0.167418	0.166168
29.33	3.35	3.04	4.42	4.38	3.45	2.93	3.85	3.91	3.14	3.64	3.27	3.83	4	4.25	4.21	2.96	4.78	3.78	3.44	3.93	3.611	3.845	0.16663	0.166168
29.42	3.35	3.04	4.42	4.38	3.63	3.03	3.85	4.02	3.15	3.64	3.27	3.83	4.15	4.25	4.21	2.96	4.78	3.78	3.44	3.93	3.651	3.86	0.163289	0.168384
29.5	3.45	3.04	4.42	4.38	3.63	3.09	3.85	4.15	3.15	3.64	3.27	3.83	4.33	4.25	4.21	2.96	4.78	3.78	3.44	3.93	3.68	3.878	0.16272	0.172735
29.58	3.45	3.04	4.42	4.39	3.64	3.09	3.85	4.16	3.15	3.64	3.27	3.83	4.33	4.25	4.21	2.96	4.78	3.78	3.44	3.93	3.683	3.878	0.16349	0.172735
29.67	3.45	3.04	4.42	4.54	3.64	3.09	3.85	4.16	3.15	3.72	3.27	3.83	4.33	4.25	4.22	2.96	4.78	3.78	3.44	3.93	3.706	3.879	0.171089	0.172951
29.75	3.45	3.04	4.42	4.54	3.64	3.09	3.85	4.16	3.15	3.79	3.27	3.83	4.33	4.25	4.22	2.98	4.78	3.78	3.44	3.93	3.713	3.881	0.171296	0.171778
29.83	3.45	3.04	4.43	4.54	3.64	3.09	3.85	4.16	3.15	3.79	3.27	3.86	4.33	4.25	4.22	2.98	4.78	3.78	3.44	4.1	3.714	3.901	0.171757	0.173048
29.92	3.46	3.04	4.43	4.54	3.64	3.09	3.85	4.16	3.15	3.79	3.3	3.93	4.33	4.25	4.22	2.98	4.88	3.79	3.44	4.1	3.715	3.922	0.171589	0.177525
30	3.54	3.04	4.43	4.54	3.64	3.09	3.85	4.16	3.16	3.79	3.3	3.93	4.33	4.25	4.22	2.98	4.88	3.79	3.44	4.1	3.724	3.922	0.17008	0.177525
30.08	3.6	3.04	4.43	4.65	3.64	3.09	3.93	4.16	3.16	3.79	3.32	3.94	4.33	4.25	4.22	2.98	4.88	3.79	3.45	4.1	3.749	3.926	0.176285	0.17646
30.17	3.6	3.06	4.43	4.65	3.64	3.09	3.93	4.16	3.16	3.79	3.34	3.94	4.33	4.25	4.22	2.98	4.88	3.79	3.45	4.1	3.751	3.928	0.175401	0.175707
30.25	3.6	3.06	4.43	4.65	3.64	3.09	3.93	4.16	3.16	3.79	3.44	3.94	4.33	4.25	4.22	2.98	4.93	3.79	3.45	4.1	3.751	3.943	0.175401	0.175322
30.33	3.6	3.06	4.43	4.65	3.64	3.09	3.93	4.16	3.16	3.79	3.44	3.94	4.33	4.29	4.22	2.98	5.01	3.81	3.45	4.1	3.751	3.957	0.175401	0.181022
30.42	3.6	3.06	4.43	4.65	3.64	3.09	3.93	4.16	3.16	3.79	3.44	3.94	4.33	4.29	4.38	3.07	5.02	3.83	3.45	4.12	3.751	3.987	0.175401	0.17963
30.5	3.65	3.1	4.43	4.65	3.64	3.16	3.93	4.16	3.17	3.79	3.44	3.94	4.38	4.29	4.39	3.16	5.02	3.88	3.45	4.12	3.768	4.007	0.169979	0.175582
30.58	3.67	3.23	4.43	4.8	3.64	3.16	3.93	4.17	3.19	3.82	3.52	3.96	4.57	4.29	4.43	3.16	5.1	3.88	3.46	4.12	3.804	4.049	0.173206	0.183724
30.67	3.67	3.33	4.43	4.84	3.73	3.16	3.93	4.17	3.21	3.82	3.52	4.14	4.67	4.29	4.43	3.16	5.1	3.88	3.46	4.12	3.829	4.077	0.170772	0.186923
30.75	3.79	3.43	4.43	4.84	3.91	3.16	3.94	4.17	3.3	3.91	3.52	4.16	4.67	4.29	4.43	3.16	5.1	3.91	3.48	4.12	3.888	4.084	0.162561	0.185946
30.83	3.79	3.43	4.49	4.84	3.91	3.26	3.94	4.17	3.47	4.03	3.52	4.17	4.67	4.29	4.43	3.16	5.1	4.02	3.61	4.16	3.933	4.113	0.154194	0.180838
30.92	3.79	3.43	4.58	4.84	3.91	3.26	3.99	4.17	3.48	4.03	3.52	4.17	4.67	4.36	4.43	3.17	5.1	4.02	3.62	4.34	3.948	4.14	0.157761	0.182148
31	3.79	3.43	4.58	4.84	3.91	3.26	4	4.17	3.48	4.03	3.53	4.17	4.67	4.36	4.43	3.29	5.14	4.02	3.62	4.37	3.949	4.16	0.157793	0.17772
31.08	3.79	3.43	4.59	4.93	3.91	3.26	4.08	4.17	3.48	4.03	3.64	4.17	4.67	4.36	4.43	3.29	5.21	4.02	3.63	4.38	3.967	4.18	0.164432	0.177883
31.17	3.79	3.43	4.59	4.93	3.91	3.26	4.1	4.17	3.48	4.08	3.69	4.23	4.67	4.36	4.44	3.29	5.25	4.05	3.7	4.38	3.974	4.206	0.164878	0.176391
31.25	3.79	3.43	4.59	4.93	3.91	3.33	4.12	4.17	3.48	4.08	3.79	4.38	4.67	4.36	4.51	3.29	5.29	4.05	3.72	4.38	3.983	4.244	0.161803	0.177177
31.33	3.93	3.44	4.59	5.06	4.08	3.38	4.12	4.17	3.48	4.08	3.79	4.38	4.67	4.36	4.51	3.29	5.29	4.05	3.72	4.45	4.033	4.251	0.16634	0.17791
31.42	3.93	3.44	4.59	5.06	4.12	3.38	4.13	4.17	3.48	4.08	3.79	4.38	4.67	4.39	4.51	3.29	5.33	4.17	3.72	4.54	4.038	4.279	0.166572	0.180834
31.5	3.96	3.44	4.59	5.06	4.12	3.38	4.13	4.19	3.48	4.18	3.79	4.38	4.67	4.46	4.51	3.29	5.44	4.21	3.72	4.54	4.053	4.301	0.167113	0.188411
31.58	4.03	3.44	4.71	5.06	4.12	3.47	4.14	4.3	3.48	4.21	3.79	4.38	4.83	4.46	4.51	3.29	5.45	4.21	3.75	4.54	4.096	4.321	0.168965	0.192166
31.67	4.03	3.44	4.77	5.06	4.12	3.54	4.23	4.5	3.48	4.22	3.91	4.38	4.83	4.46	4.51	3.29	5.47	4.21	3.87	4.54	4.139	4.347	0.172739	0.186387
31.75	4.03	3.44	4.77	5.06	4.12	3.54	4.33	4.58	3.57	4.22	3.92	4.42	4.84	4.48	4.51	3.38	5.5	4.21	3.87	4.54	4.166	4.367	0.171919	0.183152
31.83	4.03	3.45	4.77	5.07	4.12	3.54	4.37	4.59	3.63	4.22	3.94	4.64	4.84	4.48	4.51	3.39	5.5	4.21	4.02	4.73	4.179	4.426	0.170525	0.182393
31.92	4.03	3.45	4.77	5.2	4.12	3.54	4.38	4.59	3.64	4.22	3.94	4.64	4.84	4.48	4.52	3.39	5.52	4.21	4.03	4.73	4.194	4.43	0.178152	0.183515
32	4.03	3.45	4.77	5.2	4.26	3.54	4.4	4.59	3.64	4.35	3.94	4.64	4.89	4.48	4.52	3.39	5.57	4.21	4.03	4.73	4.223	4.44	0.178836	0.188119
32.08	4.03	3.46	4.77	5.2	4.36	3.54	4.4	4.59	3.65	4.45	3.98	4.64	5.02	4.57	4.52	3.41	5.63	4.21	4.03	4.73	4.245	4.474	0.179488	0.193845
32.17	4.03	3.48	4.77	5.2	4.36	3.54	4.4	4.59	3.65	4.45	4.06	4.64	5.02	4.61	4.52	3.41	5.69	4.32	4.03	4.73	4.247	4.503	0.178525	0.194548
32.25	4.06	3.65	4.77	5.2	4.36	3.54	4.45	4.59	3.65	4.45	4.1	4.64	5.02	4.61	4.73	3.41	5.7	4.44	4.03	4.73	4.272	4.541	0.171139	0.194471
32.33	4.06	3.78	4.79	5.2	4.37	3.54	4.45	4.59	3.65	4.45	4.11	4.64	5.02	4.61	4.73	3.41	5.7	4.44	4.03	4.73	4.288	4.542	0.167025	0.194221
32.42	4.06	3.78	4.79	5.2	4.38	3.72	4.55	4.59	3.65	4.45	4.11	4.64	5.02	4.61	4.73	3.41	5.7	4.44	4.03	4.73	4.317	4.542	0.160195	0.194221
32.5	4.06	3.78	4.79	5.2	4.5	3.72	4.71	4.59	3.66	4.45	4.12	4.64	5.02	4.61	4.73	3.41	5.7	4.44	4.07	4.79	4.346	4.553	0.163898	0.193563
32.58	4.06	3.78	4.79	5.2	4.5	3.72	4.77	4.59	3.68	4.45	4.12	4.64	5.03	4.72	4.73	3.41	5.77	4.44	4.11	4.92	4.354	4.589	0.164561	0.200002
32.67	4.09	3.78	4.82	5.21	4.51	3.72	4.77	4.59	3.79	4.71	4.12	4.64	5.03	4.72	4.73	3.41	5.84	4.44	4.11	4.99	4.399	4.603	0.164272	0.20601
32.75	4.15	3.78	4.96	5.21	4.51	3.72	4.77	4.59	3.85	4.74	4.14	4.64	5.03	4.72	4.73	3.48	5.96	4.44	4.11	4.99	4.428	4.624	0.16581	0.209376
32.83	4.15	3.8	4.96	5.21	4.51	3.72	4.77	4.59	3.85	4.74	4.3	4.8	5.03	4.73	4.87	3.48	6.01	4.44	4.3	4.99	4.43	4.695	0.164951	0.206146
32.92	4.15	3.91	4.96	5.21	4.51	3.79	4.77	4.59	3.85	4.74	4.31	5.01	5.03	4.73	4.88	3.48	6.01	4.44	4.3	4.99	4.448	4.718	0.157217	0.208256
33	4.15	4.09	4.96	5.21	4.51	3.79	4.84	4.59	3.85	4.74	4.31	5.01	5.2	4.75	4.88	3.53	6.01	4.44	4.3	4.99	4.473	4.742	0.153007	0.208491
33.08	4.15	4.1	4.96	5.21	4.51	3.79	4.95	4.59	3.85	4.74	4.42	5.02	5.33	4.79	4.88	3.53	6.01	4.47	4.3	5.06	4.485	4.781	0.156022	0.210293
33.17	4.15	4.1	4.96	5.21	4.51	3.79	4.95	4.59	3.85	4.74	4.53	5.02	5.33	4.94	4.88	3.53	6.01	4.66	4.3	5.12	4.485	4.832	0.156022	0.207283
33.25	4.15	4.1	4.96	5.27	4.64	3.79	4.96	4.59	3.85	4.74	4.53	5.02	5.33	4.94	4.88	3.53	6.07	4.69	4.3	5.12	4.505	4.841	0.160217	0.210863
33.33	4.21	4.15	4.96	5.37	4.64	3.84	4.96	4.59	3.85	4.74	4.53	5.02	5.33	4.94	4.88	3.53	6.07	4.69	4.3	5.13	4.531	4.842	0.160572	0.211012
33.42	4.34	4.29	4.96	5.44	4.64	3.89	4.96	4.59	3.86	4.74	4.53	5.02	5.33	4.94	4.88	3.63	6.27	4.72	4.46	5.13	4.571	4.891	0.156101	0.213596
33.5	4.34	4.34	5.04	5.44	4.64	3.9	5.25	4.59	3.86	4.74	4.53	5.02	5.33	4.94	5.08	3.69	6.27	4.72	4.46	5.13	4.614	4.917	0.167127	0.210481
33.58	4.34	4.34	5.05	5.44	4.65	3.9	5.25	4.59	3.86	4.74	4.53	5.02	5.33	4.94	5.09	3.69	6.36	4.72	4.46	5.13	4.616	4.927	0.167433	0.217082
33.67	4.34	4.34	5.05	5.45	4.68	3.9	5.26	4.59	3.86	4.9	4.53	5.02	5.38	4.94	5.09	3.69	6.36	4.72	4.46	5.13	4.637	4.932	0.170496	0.218168
33.75	4.34	4.34	5.05	5.53	4.85	3.9	5.26	4.6	3.86	4.92	4.53	5.02	5.56	4.94	5.09	3.69	6.36	4.72	4.46	5.13	4.665	4.95	0.176335	0.222965
33.83	4.34	4.34	5.18	5.53	4.94	3.9	5.26	4.6	3.99	4.92	4.53	5.02	5.73	5.08	5.09	3.69	6.36	4.72	4.46	5.29	4.7	4.997	0.174871	0.230661
33.92	4.34	4.34	5.18	5.66	4.94	3.9	5.26	4.63	4.07	5.06	4.53	5.02	5.73	5.13	5.09	3.69	6.36	4.72	4.52	5.34	4.738	5.013	0.18072	0.23016
34	4.34	4.34	5.18	5.66	4.94	3.9	5.26	4.83	4.08	5.07	4.58	5.02	5.73	5.13	5.18	3.69	6.36	4.72	4.61	5.34	4.76	5.036	0.180265	0.227495
34.08	4.34	4.34	5.18	5.66	4.94	3.93	5.26	4.92	4.08	5.07	4.71	5.02	5.73	5.13	5.18	3.69	6.36	4.78	4.61	5.34	4.772	5.055	0.179294	0.22406
34.17	4.35	4.34	5.18	5.66	4.94	4.01	5.26	4.92	4.08	5.07	4.73	5.04	5.73	5.13	5.18	3.74	6.45	4.88	4.61	5.34	4.781	5.083	0.174976	0.225093
34.25	4.38	4.34	5.18	5.66	4.94	4.01	5.26	4.92	4.08	5.07	4.73	5.04	5.78	5.14	5.18	3.74	6.51	4.88	4.63	5.34	4.784	5.097	0.174179	0.230348
34.33	4.39	4.34	5.18	5.66	4.99	4.01	5.26	4.92	4.08	5.07	4.74	5.04	5.97	5.14	5.18	3.81	6.51	4.88	4.63	5.34	4.79	5.124	0.17449	0.232652
34.42	4.39	4.34	5.18	5.82	5.14	4.02	5.26	4.92	4.08	5.07	4.74	5.04	5.97	5.26	5.19	3.88	6.51	4.99	4.63	5.34	4.822	5.155	0.185621	0.227563
34.5	4.39	4.34	5.18	5.83	5.15	4.02	5.26	4.92	4.08	5.07	4.74	5.04	5.97	5.28	5.19	3.88	6.51	4.99	4.63	5.34	4.824	5.157	0.186412	0.227674
34.58	4.39	4.35	5.18	5.83	5.15	4.02	5.26	4.92	4.08	5.07	4.74	5.04	5.97	5.28	5.19	3.88	6.51	4.99	4.63	5.34	4.825	5.157	0.186126	0.227674
34.67	4.5	4.35	5.18	5.83	5.15	4.02	5.26	4.92	4.09	5.07	4.89	5.06	5.97	5.29	5.19	3.88	6.68	4.99	4.63	5.48	4.837	5.206	0.183121	0.237969
34.75	4.6	4.35	5.18	5.83	5.15	4.02	5.26	5.04	4.22	5.07	4.89	5.14	5.97	5.29	5.19	3.88	6.69	4.99	4.63	5.53	4.872	5.22	0.176552	0.238914
34.83	4.6	4.36	5.18	5.83	5.15	4.02	5.26	5.04	4.23	5.21	4.89	5.27	5.97	5.29	5.36	3.88	6.69	4.99	4.63	5.53	4.888	5.25	0.178094	0.239049
34.92	4.6	4.57	5.19	5.94	5.15	4.02	5.27	5.04	4.23	5.3	4.89	5.28	5.97	5.29	5.48	3.88	6.69	4.99	4.63	5.53	4.931	5.263	0.18127	0.239968
35	4.6	4.57	5.19	5.94	5.15	4.02	5.27	5.04	4.23	5.3	4.89	5.28	5.97	5.29	5.48	3.88	6.69	4.99	4.63	5.54	4.931	5.264	0.18127	0.240094
35.08	4.6	4.57	5.19	5.94	5.15	4.02	5.27	5.04	4.23	5.3	4.89	5.28	6.19	5.29	5.48	3.88	6.69	4.99	4.63	5.69	4.931	5.301	0.18127	0.250304
35.17	4.6	4.57	5.19	5.94	5.15	4.02	5.27	5.04	4.23	5.3	4.89	5.28	6.19	5.29	5.49	3.88	6.69	4.99	4.63	5.69	4.931	5.302	0.18127	0.250385
35.25	4.6	4.57	5.19	5.94	5.26	4.02	5.27	5.04	4.23	5.38	4.89	5.28	6.19	5.29	5.49	3.88	6.83	4.99	4.63	5.69	4.95	5.316	0.184974	0.259243
35.33	4.63	4.57	5.19	5.96	5.48	4.02	5.27	5.04	4.23	5.39	4.89	5.28	6.19	5.42	5.65	3.88	6.83	5.01	4.63	5.69	4.978	5.347	0.191049	0.260721
35.42	4.63	4.6	5.25	5.96	5.49	4.02	5.27	5.04	4.23	5.39	4.91	5.28	6.19	5.42	5.65	3.88	6.83	5.16	4.63	5.69	4.988	5.364	0.191473	0.258595
35.5	4.65	4.72	5.41	5.96	5.49	4.02	5.28	5.04	4.25	5.39	5.05	5.28	6.19	5.43	5.65	3.88	6.83	5.16	4.63	5.69	5.021	5.379	0.190942	0.256253
35.58	4.77	4.82	5.41	5.96	5.49	4.02	5.28	5.04	4.29	5.39	5.05	5.28	6.28	5.43	5.65	3.97	6.83	5.16	4.63	5.69	5.047	5.397	0.185281	0.253837
35.67	4.78	4.86	5.41	5.96	5.49	4.02	5.28	5.04	4.29	5.39	5.05	5.28	6.43	5.43	5.65	4.05	6.83	5.17	4.63	5.69	5.052	5.421	0.184613	0.25504
35.75	4.78	5.03	5.41	5.96	5.49	4.02	5.28	5.04	4.29	5.39	5.05	5.36	6.43	5.43	5.65	4.06	6.83	5.17	4.65	5.69	5.069	5.432	0.183427	0.253381
35.83	4.78	5.03	5.41	6.09	5.49	4.02	5.28	5.04	4.29	5.39	5.05	5.48	6.43	5.43	5.65	4.06	6.83	5.17	4.74	5.69	5.082	5.453	0.190758	0.250293
35.92	4.78	5.03	5.41	6.09	5.49	4.02	5.32	5.04	4.29	5.5	5.05	5.49	6.43	5.43	5.66	4.06	6.83	5.18	4.74	5.69	5.097	5.456	0.193506	0.250272
36	4.78	5.03	5.41	6.09	5.49	4.02	5.32	5.04	4.29	5.51	5.05	5.52	6.43	5.52	5.66	4.07	6.83	5.18	4.74	5.7	5.098	5.47	0.19374	0.249858
36.08	4.78	5.03	5.41	6.12	5.49	4.02	5.32	5.04	4.5	5.51	5.05	5.52	6.43	5.52	5.7	4.07	6.83	5.18	4.74	5.7	5.122	5.474	0.186713	0.250227
36.17	4.78	5.03	5.41	6.21	5.49	4.02	5.32	5.04	4.5	5.51	5.08	5.52	6.43	5.52	5.7	4.07	6.84	5.18	4.74	5.7	5.131	5.478	0.192195	0.250283
36.25	4.78	5.03	5.41	6.21	5.49	4.02	5.32	5.04	4.5	5.51	5.08	5.52	6.43	5.52	5.7	4.07	6.84	5.24	4.74	5.7	5.131	5.484	0.192195	0.249561
36.33	4.85	5.03	5.41	6.21	5.49	4.02	5.32	5.04	4.5	5.51	5.18	5.52	6.43	5.52	5.7	4.07	6.84	5.24	4.74	5.84	5.138	5.508	0.190897	0.249639
36.42	4.96	5.1	5.41	6.21	5.49	4.02	5.32	5.04	4.5	5.51	5.18	5.52	6.43	5.52	5.7	4.07	6.89	5.24	4.74	5.85	5.156	5.514	0.189004	0.252781
36.5	4.97	5.16	5.41	6.22	5.49	4.02	5.32	5.04	4.5	5.51	5.18	5.52	6.43	5.52	5.7	4.13	6.89	5.24	4.87	5.86	5.164	5.534	0.189404	0.244941
36.58	4.97	5.16	5.41	6.22	5.49	4.02	5.32	5.04	4.5	5.51	5.18	5.52	6.43	5.53	5.7	4.13	7.01	5.24	4.88	5.86	5.164	5.548	0.189404	0.252194
36.67	4.97	5.16	5.41	6.27	5.49	4.02	5.32	5.04	4.5	5.72	5.18	5.52	6.43	5.54	5.7	4.13	7.01	5.24	4.88	5.86	5.19	5.549	0.197748	0.252188
36.75	4.97	5.16	5.41	6.27	5.49	4.04	5.41	5.04	4.5	5.73	5.18	5.52	6.44	5.54	5.7	4.13	7.01	5.24	4.88	5.86	5.202	5.55	0.19759	0.252578
36.83	4.97	5.16	5.41	6.27	5.49	4.17	5.41	5.04	4.5	5.73	5.19	5.52	6.44	5.54	5.7	4.13	7.03	5.24	4.88	5.86	5.215	5.553	0.189351	0.253706
36.92	4.97	5.16	5.41	6.27	5.49	4.21	5.42	5.04	4.5	5.73	5.23	5.52	6.44	5.54	5.7	4.13	7.12	5.24	4.88	5.86	5.22	5.566	0.187041	0.259012
37	4.97	5.27	5.43	6.27	5.49	4.22	5.42	5.04	4.5	5.75	5.36	5.52	6.44	5.54	5.7	4.13	7.12	5.24	4.9	5.86	5.236	5.581	0.187191	0.256863
37.08	4.97	5.37	5.43	6.27	5.49	4.22	5.45	5.04	4.5	5.75	5.36	5.52	6.44	5.58	5.7	4.13	7.12	5.26	5.01	5.86	5.249	5.598	0.187992	0.253477
37.17	4.97	5.37	5.43	6.27	5.49	4.22	5.45	5.04	4.55	5.75	5.36	5.52	6.44	5.74	5.7	4.13	7.29	5.26	5.01	5.86	5.254	5.631	0.185833	0.26537
37.25	4.97	5.37	5.43	6.27	5.49	4.22	5.45	5.04	4.63	5.75	5.37	5.52	6.44	5.74	5.7	4.13	7.29	5.26	5.02	5.86	5.262	5.633	0.182609	0.264999
37.33	4.97	5.37	5.43	6.3	5.49	4.22	5.45	5.04	4.63	5.75	5.37	5.52	6.44	5.74	5.7	4.14	7.29	5.26	5.02	5.86	5.265	5.634	0.184465	0.26437
37.42	4.97	5.37	5.43	6.41	5.49	4.22	5.45	5.04	4.63	5.75	5.37	5.52	6.44	5.74	5.7	4.14	7.29	5.26	5.02	5.86	5.276	5.634	0.191516	0.26437
37.5	4.97	5.37	5.43	6.41	5.64	4.22	5.45	5.04	4.76	5.75	5.37	5.52	6.53	5.74	5.7	4.14	7.29	5.26	5.02	5.86	5.304	5.643	0.18941	0.267553
37.58	4.97	5.37	5.43	6.41	5.71	4.22	5.45	5.04	4.88	5.75	5.37	5.52	6.71	5.74	5.72	4.14	7.29	5.26	5.02	5.86	5.323	5.663	0.18741	0.274732
37.67	5.02	5.37	5.43	6.41	5.71	4.22	5.45	5.04	4.88	5.75	5.37	5.52	6.78	5.74	5.72	4.16	7.39	5.26	5.02	5.86	5.328	5.682	0.186427	0.283152
37.75	5.14	5.37	5.43	6.41	5.71	4.22	5.45	5.04	4.88	5.75	5.37	5.56	6.78	5.78	5.72	4.31	7.4	5.26	5.02	5.86	5.34	5.706	0.184602	0.274976
37.83	5.14	5.37	5.43	6.41	5.71	4.22	5.45	5.04	4.88	5.75	5.43	5.73	6.78	5.87	5.72	4.34	7.4	5.26	5.02	5.86	5.34	5.741	0.184602	0.272313
37.92	5.14	5.37	5.43	6.41	5.71	4.22	5.45	5.04	4.88	5.75	5.44	5.73	6.78	5.87	5.72	4.34	7.4	5.26	5.02	5.86	5.34	5.742	0.184602	0.272188
38	5.14	5.37	5.43	6.41	5.71	4.22	5.67	5.04	4.88	5.75	5.44	5.74	6.78	5.87	5.72	4.34	7.5	5.37	5.02	5.86	5.362	5.764	0.187349	0.277097
38.08	5.15	5.37	5.43	6.41	5.71	4.22	5.67	5.04	4.88	5.75	5.44	5.74	6.78	5.87	5.85	4.34	7.66	5.37	5.02	5.88	5.363	5.795	0.18722	0.288514
38.17	5.15	5.42	5.43	6.42	5.71	4.22	5.67	5.04	4.88	5.75	5.44	5.74	6.78	5.87	5.85	4.34	7.67	5.37	5.02	6.07	5.369	5.815	0.187927	0.290468
38.25	5.15	5.55	5.43	6.42	5.71	4.22	5.67	5.04	4.88	5.75	5.44	5.74	6.78	5.87	5.86	4.34	7.67	5.37	5.02	6.08	5.382	5.817	0.188767	0.290582
38.33	5.15	5.55	5.43	6.42	5.71	4.22	5.67	5.04	4.88	5.75	5.44	5.74	6.78	5.87	5.86	4.4	7.67	5.37	5.02	6.1	5.382	5.825	0.188767	0.287442
38.42	5.15	5.55	5.43	6.42	5.71	4.22	5.67	5.04	4.88	5.81	5.44	5.74	6.78	5.87	5.86	4.48	7.68	5.37	5.02	6.11	5.388	5.835	0.190157	0.283942
38.5	5.15	5.56	5.43	6.42	5.71	4.22	5.67	5.04	4.88	5.93	5.44	5.74	6.78	5.87	5.86	4.48	7.68	5.37	5.02	6.11	5.401	5.835	0.193554	0.283942
38.58	5.27	5.56	5.43	6.42	5.71	4.22	5.67	5.04	4.88	5.93	5.44	5.74	6.78	5.87	5.86	4.48	7.68	5.37	5.11	6.11	5.413	5.844	0.192192	0.281201
38.67	5.27	5.56	5.43	6.42	5.71	4.22	5.81	5.04	4.89	5.93	5.44	5.74	6.78	5.87	5.86	4.48	7.68	5.37	5.28	6.11	5.428	5.861	0.194455	0.276749
38.75	5.27	5.56	5.43	6.42	5.71	4.22	5.81	5.05	4.89	5.93	5.69	5.74	6.78	5.87	5.86	4.48	7.68	5.38	5.28	6.11	5.429	5.887	0.194236	0.273427
38.83	5.28	5.56	5.43	6.43	5.71	4.22	5.81	5.1	4.89	5.93	5.7	5.74	6.78	5.87	5.86	4.48	7.68	5.38	5.28	6.11	5.436	5.888	0.19369	0.273349
38.92	5.34	5.56	5.43	6.62	5.71	4.22	5.81	5.26	4.89	5.93	5.7	5.74	6.78	5.87	5.86	4.48	7.68	5.39	5.28	6.11	5.477	5.889	0.202111	0.273144
39	5.37	5.56	5.43	6.62	5.71	4.22	5.82	5.26	4.89	5.93	5.7	5.74	6.78	5.91	5.86	4.48	7.68	5.48	5.28	6.11	5.481	5.902	0.202092	0.271444
39.08	5.37	5.56	5.43	6.62	5.71	4.23	5.82	5.27	4.89	5.93	5.7	5.74	6.78	6.04	5.86	4.48	7.68	5.53	5.28	6.11	5.483	5.92	0.20128	0.270953
39.17	5.37	5.56	5.43	6.62	5.71	4.23	5.82	5.27	4.89	5.93	5.7	5.74	6.78	6.06	5.86	4.48	7.68	5.53	5.29	6.11	5.483	5.923	0.20128	0.270797
39.25	5.37	5.56	5.43	6.62	5.71	4.23	5.82	5.27	4.89	5.93	5.7	5.74	6.78	6.06	5.86	4.48	7.68	5.55	5.29	6.11	5.483	5.925	0.20128	0.270482
39.33	5.37	5.56	5.43	6.62	5.71	4.23	5.82	5.27	4.89	5.93	5.7	5.74	6.78	6.06	5.86	4.48	7.68	5.55	5.29	6.11	5.483	5.925	0.20128	0.270482
39.42	5.37	5.56	5.43	6.62	5.71	4.23	5.82	5.27	4.89	5.94	5.7	5.74	6.78	6.09	5.86	4.48	7.68	5.55	5.29	6.12	5.484	5.929	0.201529	0.270742
39.5	5.37	5.56	5.43	6.62	5.71	4.23	5.87	5.27	4.89	5.94	5.7	5.74	6.78	6.09	5.94	4.48	7.68	5.55	5.29	6.14	5.489	5.939	0.202514	0.270791
39.58	5.37	5.56	5.63	6.62	5.8	4.23	6.02	5.27	4.89	5.94	5.7	5.74	6.78	6.09	5.95	4.48	7.68	5.55	5.29	6.17	5.533	5.943	0.20744	0.271056
39.67	5.37	5.56	5.63	6.62	5.96	4.23	6.08	5.27	4.89	5.94	5.7	5.74	6.78	6.09	5.95	4.48	7.68	5.55	5.29	6.17	5.555	5.943	0.211898	0.271056
39.75	5.37	5.56	5.63	6.78	5.96	4.23	6.08	5.27	4.89	5.94	5.7	5.74	6.78	6.09	5.95	4.48	7.68	5.55	5.29	6.17	5.571	5.943	0.221231	0.271056
39.83	5.37	5.56	5.64	6.78	5.96	4.23	6.08	5.27	4.9	5.94	5.7	5.74	6.78	6.09	5.95	4.48	7.68	5.55	5.29	6.17	5.573	5.943	0.220923	0.271056
39.92	5.41	5.56	5.64	6.78	5.96	4.33	6.12	5.27	4.9	5.94	5.71	5.74	6.78	6.09	5.95	4.49	7.68	5.55	5.31	6.22	5.591	5.952	0.214949	0.270332
40	5.51	5.56	5.64	6.78	5.96	4.33	6.21	5.27	4.9	6.06	5.71	5.74	6.78	6.09	5.95	4.66	7.68	5.55	5.31	6.22	5.622	5.969	0.219189	0.260472
40.08	5.51	5.56	5.64	6.79	5.96	4.33	6.21	5.27	4.95	6.17	5.71	5.74	6.78	6.09	5.95	4.66	7.68	5.66	5.32	6.22	5.639	5.981	0.220683	0.258446
40.17	5.51	5.56	5.64	6.79	5.96	4.33	6.21	5.27	5.06	6.17	5.71	5.74	6.78	6.14	5.95	4.66	7.68	5.66	5.32	6.22	5.65	5.986	0.217112	0.258729
40.25	5.51	5.56	5.65	6.79	5.96	4.33	6.21	5.28	5.16	6.17	5.75	5.74	6.78	6.29	5.95	4.66	7.68	5.66	5.32	6.22	5.662	6.005	0.214097	0.259685
40.33	5.52	5.56	5.78	6.79	5.97	4.33	6.21	5.28	5.16	6.17	5.88	5.74	6.78	6.3	5.95	4.66	7.68	5.66	5.32	6.22	5.677	6.019	0.214476	0.258708
40.42	5.52	5.56	5.78	6.79	5.97	4.33	6.21	5.28	5.16	6.17	5.89	5.74	6.78	6.3	5.95	4.66	7.68	5.66	5.32	6.22	5.677	6.02	0.214476	0.25865
40.5	5.52	5.56	5.79	6.79	5.97	4.33	6.21	5.28	5.16	6.17	5.89	5.8	6.78	6.3	5.95	4.66	7.68	5.66	5.32	6.22	5.678	6.026	0.214532	0.257997
40.58	5.52	5.56	5.79	6.79	5.97	4.33	6.21	5.28	5.16	6.17	5.89	5.93	6.92	6.3	5.95	4.66	7.68	5.66	5.32	6.33	5.678	6.064	0.214532	0.262887
40.67	5.52	5.56	5.79	6.79	5.97	4.33	6.27	5.28	5.16	6.17	5.89	5.96	7.06	6.3	6.07	4.66	7.68	5.66	5.32	6.46	5.684	6.106	0.216262	0.269309
40.75	5.53	5.56	5.79	6.79	6.14	4.33	6.27	5.28	5.16	6.17	5.89	5.96	7.07	6.3	6.13	4.66	7.69	5.67	5.32	6.47	5.702	6.116	0.219316	0.270285
40.83	5.55	5.56	5.79	6.79	6.18	4.33	6.27	5.35	5.16	6.17	5.89	5.96	7.07	6.3	6.13	4.66	7.7	5.7	5.32	6.47	5.715	6.12	0.218664	0.270399
40.92	5.58	5.56	5.79	6.79	6.18	4.33	6.27	5.41	5.22	6.22	5.89	5.96	7.07	6.3	6.13	4.66	7.7	5.8	5.32	6.47	5.735	6.13	0.216924	0.268854
41	5.67	5.56	5.89	6.84	6.18	4.33	6.27	5.47	5.32	6.41	5.93	5.96	7.07	6.36	6.13	4.66	7.7	5.81	5.32	6.47	5.794	6.141	0.221144	0.268826
41.08	5.67	5.56	5.91	7.04	6.18	4.33	6.27	5.47	5.33	6.41	5.93	5.96	7.07	6.45	6.16	4.66	7.7	5.81	5.5	6.47	5.817	6.171	0.232126	0.264148
41.17	5.67	5.56	5.91	7.04	6.18	4.34	6.27	5.47	5.33	6.41	5.93	5.96	7.07	6.45	6.28	4.66	7.7	5.82	5.5	6.47	5.818	6.184	0.231415	0.26421
41.25	5.68	5.56	5.91	7.04	6.3	4.34	6.27	5.47	5.33	6.41	5.98	5.96	7.07	6.45	6.28	4.66	7.7	5.82	5.52	6.47	5.831	6.191	0.233726	0.26315
41.33	5.71	5.56	5.91	7.04	6.3	4.34	6.28	5.47	5.33	6.41	5.98	5.96	7.07	6.45	6.28	4.67	7.7	5.82	5.52	6.55	5.835	6.2	0.233739	0.263565
41.42	5.71	5.56	5.91	7.04	6.31	4.34	6.28	5.47	5.33	6.41	5.98	5.96	7.07	6.45	6.28	4.67	7.7	5.82	5.52	6.63	5.836	6.208	0.233962	0.264864
41.5	5.72	5.58	5.91	7.04	6.31	4.34	6.28	5.47	5.33	6.41	5.98	5.96	7.07	6.45	6.28	4.69	7.7	5.82	5.52	6.63	5.839	6.21	0.23365	0.263578
41.58	5.72	5.58	5.91	7.04	6.31	4.34	6.28	5.47	5.33	6.52	5.98	5.96	7.07	6.45	6.28	4.84	7.7	5.82	5.52	6.63	5.85	6.225	0.236873	0.254228
41.67	5.72	5.58	5.91	7.04	6.31	4.34	6.28	5.47	5.33	6.62	5.98	5.96	7.08	6.45	6.28	4.86	7.7	5.82	5.52	6.63	5.86	6.228	0.240204	0.253394
41.75	5.72	5.58	5.91	7.04	6.31	4.36	6.28	5.47	5.33	6.62	5.98	5.96	7.08	6.53	6.28	4.86	7.7	5.83	5.52	6.63	5.862	6.237	0.238802	0.254117
41.83	5.72	5.58	5.91	7.05	6.31	4.36	6.28	5.47	5.33	6.62	5.98	5.96	7.08	6.53	6.28	4.86	7.7	5.94	5.52	6.63	5.863	6.248	0.239351	0.252392
41.92	5.72	5.58	5.91	7.05	6.31	4.36	6.28	5.47	5.33	6.62	5.98	5.96	7.08	6.54	6.31	4.87	7.7	5.95	5.52	6.63	5.863	6.254	0.239351	0.25183
42	5.72	5.58	5.91	7.05	6.31	4.55	6.28	5.47	5.33	6.62	6.09	5.96	7.08	6.54	6.39	4.87	7.7	5.95	5.52	6.63	5.882	6.273	0.226504	0.251025
42.08	5.72	5.58	6.08	7.05	6.31	4.61	6.28	5.47	5.33	6.62	6.09	5.96	7.08	6.54	6.4	4.87	7.7	5.95	5.52	6.63	5.905	6.274	0.223464	0.251079
42.17	5.72	5.58	6.08	7.05	6.31	4.61	6.28	5.47	5.33	6.62	6.09	5.96	7.08	6.54	6.4	4.87	7.7	5.95	5.52	6.63	5.905	6.274	0.223464	0.251079
42.25	5.8	5.58	6.11	7.05	6.31	4.62	6.36	5.47	5.35	6.62	6.09	5.96	7.08	6.54	6.4	4.87	7.7	5.95	5.52	6.63	5.927	6.274	0.223498	0.251079
42.33	5.81	5.58	6.16	7.05	6.31	4.62	6.36	5.66	5.35	6.63	6.09	5.96	7.08	6.56	6.4	4.87	7.7	5.95	5.52	6.63	5.953	6.276	0.220696	0.251322
42.42	5.81	5.64	6.16	7.05	6.42	4.62	6.37	5.68	5.35	6.63	6.09	5.96	7.08	6.56	6.4	4.87	7.7	5.95	5.52	6.63	5.973	6.276	0.221761	0.251322
42.5	5.88	5.64	6.16	7.05	6.45	4.62	6.37	5.68	5.48	6.63	6.09	5.96	7.08	6.56	6.4	4.88	7.7	5.96	5.52	6.64	5.996	6.279	0.218211	0.250717
42.58	5.88	5.64	6.16	7.05	6.45	4.62	6.37	5.68	5.57	6.63	6.09	5.96	7.08	6.56	6.4	4.88	7.7	5.96	5.52	6.67	6.005	6.282	0.216021	0.251214
42.67	5.88	5.64	6.16	7.05	6.45	4.62	6.37	5.68	5.57	6.63	6.09	5.96	7.08	6.56	6.4	4.88	7.7	5.96	5.52	6.67	6.005	6.282	0.216021	0.251214
42.75	5.88	5.64	6.16	7.05	6.46	4.62	6.37	5.68	5.57	6.63	6.09	5.96	7.08	6.56	6.4	4.88	7.7	5.96	5.54	6.67	6.006	6.284	0.216252	0.250547
42.83	5.88	5.64	6.16	7.05	6.46	4.62	6.37	5.68	5.58	6.63	6.09	5.96	7.08	6.56	6.44	4.89	7.7	5.96	5.54	6.67	6.007	6.289	0.21603	0.250162
42.92	5.88	5.64	6.31	7.05	6.46	4.62	6.37	5.68	5.58	6.63	6.09	5.96	7.08	6.56	6.56	4.89	7.7	5.96	5.54	6.67	6.022	6.301	0.217725	0.251252
43	5.88	5.64	6.31	7.05	6.46	4.62	6.37	5.68	5.58	6.63	6.09	5.96	7.08	6.56	6.56	4.89	7.72	5.96	5.54	6.67	6.022	6.303	0.217725	0.252494
43.08	5.88	5.64	6.31	7.05	6.46	4.62	6.37	5.68	5.58	6.63	6.09	5.96	7.08	6.56	6.56	4.89	7.72	5.96	5.54	6.68	6.022	6.304	0.217725	0.252658
43.17	5.88	5.64	6.31	7.05	6.46	4.62	6.37	5.68	5.58	6.63	6.1	5.96	7.08	6.56	6.56	4.89	7.72	5.96	5.54	6.72	6.022	6.309	0.217725	0.253256
43.25	5.88	5.64	6.31	7.05	6.46	4.62	6.37	5.68	5.58	6.63	6.23	5.96	7.08	6.56	6.56	4.89	7.72	5.96	5.54	6.72	6.022	6.322	0.217725	0.252397
43.33	5.88	5.64	6.31	7.05	6.46	4.62	6.37	5.68	5.58	6.63	6.23	5.96	7.08	6.56	6.56	4.89	7.72	5.96	5.54	6.72	6.022	6.322	0.217725	0.252397
43.42	5.88	5.64	6.33	7.05	6.46	4.62	6.37	5.68	5.58	6.63	6.23	5.96	7.08	6.56	6.56	4.89	7.72	5.96	5.54	6.72	6.024	6.322	0.218028	0.252397
43.5	5.89	5.64	6.42	7.06	6.69	4.62	6.37	5.68	5.58	6.63	6.23	5.96	7.08	6.56	6.56	4.89	7.72	5.96	5.54	6.72	6.058	6.322	0.226106	0.252397
43.58	5.89	5.64	6.42	7.06	6.7	4.63	6.37	5.68	5.58	6.63	6.23	5.96	7.08	6.56	6.56	4.89	7.72	5.98	5.54	6.72	6.06	6.324	0.225714	0.252086
43.67	5.96	5.64	6.42	7.06	6.7	4.77	6.37	5.68	5.58	6.63	6.23	5.96	7.08	6.56	6.64	4.89	7.72	6.06	5.54	6.72	6.081	6.34	0.215538	0.25193
43.75	5.96	5.64	6.42	7.06	6.7	4.85	6.37	5.68	5.58	6.63	6.23	5.96	7.08	6.56	6.69	4.89	7.72	6.06	5.54	6.72	6.089	6.345	0.210214	0.25264
43.83	5.96	5.64	6.42	7.06	6.7	4.85	6.37	5.69	5.58	6.63	6.23	5.96	7.08	6.56	6.7	4.89	7.72	6.06	5.54	6.72	6.09	6.346	0.21	0.252794
43.92	5.96	5.64	6.42	7.06	6.7	4.85	6.37	5.69	5.58	6.63	6.23	5.96	7.08	6.56	6.7	4.89	7.72	6.06	5.54	6.72	6.09	6.346	0.21	0.252794
44	5.96	5.64	6.42	7.06	6.7	4.85	6.37	5.69	5.58	6.63	6.23	5.96	7.08	6.56	6.7	4.89	7.72	6.06	5.6	6.72	6.09	6.352	0.21	0.250731
44.08	5.96	5.64	6.42	7.06	6.7	4.85	6.37	5.69	5.59	6.63	6.23	5.96	7.08	6.61	6.7	4.89	7.72	6.15	5.63	6.72	6.091	6.369	0.209732	0.249214
44.17	5.96	5.64	6.42	7.06	6.7	4.85	6.37	5.69	5.59	6.63	6.23	5.96	7.08	6.69	6.7	4.89	7.72	6.2	5.63	6.77	6.091	6.387	0.209732	0.250546
44.25	5.96	5.64	6.42	7.06	6.7	4.85	6.37	5.69	5.59	6.63	6.23	5.96	7.08	6.69	6.7	4.89	7.72	6.2	5.63	6.86	6.091	6.396	0.209732	0.252231
44.33	5.96	5.64	6.42	7.06	6.7	4.85	6.37	5.69	5.59	6.63	6.34	5.96	7.08	6.69	6.7	4.89	7.72	6.2	5.63	6.86	6.091	6.407	0.209732	0.251666
44.42	5.96	5.64	6.42	7.06	6.7	4.85	6.37	5.69	5.59	6.63	6.36	5.96	7.08	6.69	6.7	4.89	7.72	6.2	5.63	6.86	6.091	6.409	0.209732	0.251615
44.5	5.96	5.64	6.42	7.06	6.7	4.85	6.37	5.69	5.59	6.63	6.36	5.96	7.08	6.69	6.78	4.89	7.72	6.2	5.63	6.86	6.091	6.417	0.209732	0.252767
44.58	5.96	5.64	6.42	7.06	6.7	4.85	6.37	5.71	5.59	6.63	6.36	5.96	7.08	6.69	6.78	4.89	7.72	6.2	5.63	6.86	6.093	6.417	0.209317	0.252767
44.67	5.96	5.64	6.49	7.06	6.7	4.85	6.37	5.79	5.59	6.63	6.36	5.96	7.08	6.69	6.78	4.89	7.72	6.2	5.63	6.86	6.108	6.417	0.209145	0.252767
44.75	5.96	5.64	6.56	7.06	6.7	5.01	6.38	5.94	5.59	6.63	6.39	5.96	7.09	6.69	6.78	4.89	7.72	6.2	5.63	6.86	6.147	6.421	0.198198	0.253002
44.83	5.96	5.64	6.56	7.06	6.7	5.01	6.38	5.94	5.59	6.63	6.41	5.96	7.09	6.69	6.78	4.89	7.72	6.2	5.63	6.86	6.147	6.423	0.198198	0.252982
44.92	5.96	5.64	6.56	7.06	6.7	5.01	6.38	5.94	5.62	6.63	6.41	5.96	7.09	6.69	6.78	4.89	7.72	6.2	5.63	6.86	6.15	6.423	0.197282	0.252982
45	5.96	5.64	6.56	7.06	6.7	5.01	6.38	5.96	5.62	6.63	6.41	5.96	7.09	6.69	6.78	4.89	7.72	6.2	5.63	6.86	6.152	6.423	0.197055	0.252982
45.08	5.96	5.64	6.56	7.06	6.7	5.01	6.38	5.96	5.62	6.63	6.41	5.96	7.09	6.69	6.78	4.89	7.72	6.2	5.63	6.86	6.152	6.423	0.197055	0.252982
45.17	5.96	5.64	6.56	7.06	6.7	5.01	6.38	5.96	5.62	6.63	6.41	5.96	7.09	6.69	6.82	4.89	7.72	6.2	5.63	6.86	6.152	6.427	0.197055	0.25364
45.25	5.96	5.64	6.56	7.06	6.7	5.01	6.38	5.96	5.62	6.63	6.41	5.96	7.09	6.69	6.83	4.89	7.72	6.2	5.63	6.86	6.152	6.428	0.197055	0.253814
45.33	5.96	5.64	6.56	7.06	6.7	5.01	6.38	5.96	5.62	6.63	6.41	5.96	7.09	6.69	6.83	4.89	7.72	6.2	5.63	6.86	6.152	6.428	0.197055	0.253814
45.42	5.96	5.64	6.56	7.06	6.7	5.01	6.38	5.96	5.62	6.63	6.41	5.96	7.09	6.69	6.83	4.89	7.72	6.2	5.63	6.86	6.152	6.428	0.197055	0.253814
45.5	5.96	5.64	6.56	7.06	6.7	5.01	6.38	5.96	5.62	6.63	6.41	5.96	7.09	6.69	6.83	4.89	7.72	6.2	5.7	6.86	6.152	6.435	0.197055	0.251455
45.58	5.96	5.64	6.56	7.06	6.7	5.01	6.38	5.96	5.62	6.63	6.41	5.96	7.09	6.69	6.83	4.89	7.72	6.2	5.76	6.86	6.152	6.441	0.197055	0.249571
45.67	5.96	5.67	6.56	7.06	6.7	5.01	6.38	5.96	5.62	6.63	6.41	5.96	7.09	6.69	6.83	4.89	7.72	6.2	5.77	6.86	6.155	6.442	0.19621	0.249269
45.75	5.96	5.67	6.56	7.06	6.7	5.01	6.38	5.96	5.62	6.63	6.48	5.96	7.09	6.69	6.83	4.89	7.72	6.2	5.77	6.86	6.155	6.449	0.19621	0.249268
45.83	5.96	5.67	6.56	7.06	6.7	5.01	6.38	5.96	5.62	6.77	6.54	5.96	7.09	6.7	6.83	4.89	7.72	6.2	5.77	6.86	6.169	6.456	0.20043	0.249529
45.92	5.96	5.67	6.56	7.06	6.7	5.01	6.38	5.96	5.62	6.77	6.54	5.96	7.09	6.7	6.83	4.89	7.72	6.2	5.77	6.86	6.169	6.456	0.20043	0.249529
46	5.96	5.67	6.56	7.06	6.7	5.01	6.38	5.96	5.62	6.77	6.54	5.96	7.09	6.7	6.83	4.89	7.72	6.2	5.77	6.86	6.169	6.456	0.20043	0.249529
46.08	5.96	5.67	6.56	7.06	6.7	5.01	6.38	5.96	5.62	6.77	6.54	5.96	7.09	6.7	6.83	4.89	7.72	6.2	5.77	6.86	6.169	6.456	0.20043	0.249529
46.17	5.96	5.67	6.56	7.06	6.7	5.01	6.38	5.96	5.62	6.77	6.54	5.96	7.09	6.7	6.84	4.89	7.72	6.2	5.77	6.86	6.169	6.457	0.20043	0.249698
46.25	5.96	5.67	6.56	7.06	6.7	5.01	6.38	5.96	5.62	6.77	6.54	5.96	7.09	6.7	6.98	4.89	7.72	6.2	5.77	6.86	6.169	6.471	0.20043	0.252461
46.33	5.96	5.67	6.56	7.06	6.7	5.02	6.38	5.96	5.62	6.77	6.54	5.96	7.09	6.74	6.98	4.89	7.72	6.2	5.77	6.86	6.17	6.475	0.199789	0.252895
46.42	5.96	5.67	6.56	7.06	6.7	5.02	6.38	5.96	5.62	6.77	6.54	5.96	7.09	6.88	6.98	4.89	7.72	6.2	5.77	6.86	6.17	6.489	0.199789	0.254905
46.5	5.96	5.67	6.56	7.06	6.7	5.02	6.38	5.96	5.69	6.77	6.54	5.96	7.09	6.89	6.98	4.89	7.72	6.2	5.77	6.86	6.177	6.49	0.19776	0.255077
46.58	5.96	5.67	6.56	7.06	6.7	5.02	6.38	5.96	5.79	6.77	6.54	5.96	7.09	6.89	6.98	4.89	7.72	6.2	5.77	6.86	6.187	6.49	0.195261	0.255077
46.67	5.96	5.67	6.56	7.06	6.7	5.02	6.38	5.96	5.8	6.77	6.54	5.96	7.09	6.89	6.98	4.89	7.72	6.2	5.77	6.86	6.188	6.49	0.195037	0.255077
46.75	5.96	5.67	6.56	7.06	6.7	5.02	6.38	5.96	5.8	6.77	6.54	5.96	7.09	6.89	6.98	4.89	7.72	6.2	5.77	6.86	6.188	6.49	0.195037	0.255077
46.83	5.96	5.67	6.56	7.06	6.7	5.02	6.38	5.96	5.8	6.77	6.54	5.96	7.09	6.89	6.99	4.89	7.72	6.2	5.77	6.86	6.188	6.491	0.195037	0.255293
46.92	5.96	5.67	6.56	7.06	6.7	5.02	6.38	5.96	5.8	6.77	6.57	5.96	7.09	6.89	6.99	4.89	7.72	6.2	5.77	6.86	6.188	6.494	0.195037	0.255374
47	5.98	5.67	6.56	7.06	6.7	5.02	6.38	5.96	5.8	6.77	6.58	5.96	7.09	6.89	6.99	4.89	7.72	6.2	5.77	6.89	6.19	6.498	0.194788	0.255903
47.08	6.05	5.67	6.56	7.06	6.7	5.02	6.38	5.96	5.8	6.77	6.58	5.96	7.09	6.89	6.99	4.89	7.72	6.2	5.77	6.89	6.197	6.498	0.194074	0.255903
47.17	6.05	5.67	6.8	7.06	6.7	5.02	6.38	5.96	5.8	6.77	6.58	5.96	7.09	6.89	6.99	4.89	7.72	6.2	5.77	6.89	6.221	6.498	0.200441	0.255903
47.25	6.06	5.67	6.8	7.06	6.7	5.06	6.38	5.96	5.8	6.77	6.58	5.96	7.09	6.89	6.99	4.89	7.72	6.2	5.77	6.89	6.226	6.498	0.197705	0.255903
47.33	6.06	5.67	6.8	7.06	6.7	5.08	6.38	5.96	5.8	6.85	6.58	5.96	7.09	6.89	6.99	4.89	7.72	6.2	5.77	6.89	6.236	6.498	0.198999	0.255903
47.42	6.06	5.67	6.8	7.06	6.7	5.08	6.38	5.96	5.8	6.85	6.58	5.96	7.09	6.89	6.99	4.89	7.72	6.2	5.77	6.89	6.236	6.498	0.198999	0.255903
47.5	6.06	5.67	6.8	7.06	6.7	5.08	6.41	5.96	5.8	6.85	6.58	5.96	7.09	6.89	6.99	4.89	7.72	6.2	5.77	6.89	6.239	6.498	0.199262	0.255903
47.58	6.06	5.67	6.8	7.07	6.7	5.08	6.41	5.96	5.8	6.85	6.58	5.96	7.09	6.89	6.99	4.89	7.72	6.2	5.78	6.89	6.24	6.499	0.199722	0.255588
47.67	6.06	5.67	6.8	7.07	6.7	5.08	6.41	5.96	5.8	6.85	6.58	5.96	7.09	6.89	6.99	4.89	7.72	6.2	5.78	6.89	6.24	6.499	0.199722	0.255588
47.75	6.06	5.67	6.8	7.07	6.7	5.08	6.41	5.96	5.81	6.85	6.58	5.96	7.09	6.89	6.99	4.89	7.72	6.2	5.78	6.89	6.241	6.499	0.19948	0.255588
47.83	6.06	5.67	6.8	7.07	6.7	5.08	6.41	5.96	5.81	6.85	6.58	5.96	7.09	6.89	6.99	4.89	7.72	6.2	5.79	6.89	6.241	6.5	0.19948	0.255278
47.92	6.06	5.67	6.8	7.07	6.7	5.08	6.41	5.96	5.81	6.85	6.58	6.05	7.09	6.89	6.99	4.89	7.72	6.2	5.79	6.89	6.241	6.509	0.19948	0.253313
48	6.06	5.67	6.8	7.07	6.7	5.08	6.41	5.96	5.81	6.85	6.58	6.05	7.09	6.89	6.99	4.89	7.72	6.2	5.79	6.89	6.241	6.509	0.19948	0.253313
48.08	6.06	5.67	6.8	7.07	6.7	5.08	6.41	5.96	5.81	6.85	6.6	6.05	7.09	6.89	6.99	5	7.72	6.2	5.79	6.89	6.241	6.522	0.19948	0.245686
48.17	6.06	5.67	6.8	7.07	6.7	5.08	6.41	5.96	5.82	6.85	6.69	6.05	7.09	6.93	6.99	5	7.72	6.2	5.79	6.89	6.242	6.535	0.199242	0.246848
48.25	6.06	5.67	6.8	7.07	6.7	5.08	6.41	5.96	5.82	6.85	6.69	6.05	7.09	6.93	6.99	5	7.72	6.2	5.79	6.89	6.242	6.535	0.199242	0.246848
48.33	6.06	5.67	6.8	7.07	6.7	5.08	6.43	5.96	5.91	6.85	6.7	6.05	7.09	6.93	6.99	5	7.72	6.2	5.79	6.89	6.253	6.536	0.197507	0.24692
48.42	6.06	5.67	6.8	7.07	6.7	5.08	6.43	5.96	5.91	6.85	6.7	6.05	7.09	6.93	6.99	5	7.72	6.2	5.79	6.89	6.253	6.536	0.197507	0.24692
48.5	6.06	5.67	6.8	7.07	6.7	5.08	6.43	5.96	5.92	6.85	6.7	6.05	7.09	6.93	6.99	5	7.72	6.2	5.79	6.89	6.254	6.536	0.197316	0.24692
48.58	6.11	5.67	6.8	7.07	6.7	5.08	6.43	5.96	5.92	6.85	6.7	6.05	7.09	6.93	6.99	5	7.72	6.2	5.79	6.9	6.259	6.537	0.196833	0.247081
48.67	6.12	5.67	6.8	7.07	6.7	5.08	6.43	5.96	5.92	6.85	6.7	6.05	7.09	6.93	6.99	5	7.72	6.2	5.79	7.03	6.26	6.55	0.196751	0.249533
48.75	6.12	5.67	6.8	7.07	6.7	5.08	6.43	5.96	5.92	6.85	6.7	6.05	7.09	6.93	7.02	5	7.72	6.2	5.79	7.04	6.26	6.554	0.196751	0.250352
48.83	6.12	5.67	6.8	7.07	6.75	5.08	6.43	6.08	5.92	6.85	6.7	6.05	7.09	6.93	7.06	5	7.72	6.27	5.79	7.04	6.277	6.565	0.196356	0.250197
48.92	6.12	5.67	6.8	7.07	6.76	5.08	6.43	6.2	5.92	6.85	6.7	6.05	7.09	6.93	7.06	5	7.72	6.27	5.79	7.06	6.29	6.567	0.195647	0.250626
49	6.12	5.67	6.8	7.07	6.76	5.08	6.45	6.2	5.92	6.85	6.7	6.05	7.09	6.93	7.06	5	7.72	6.28	5.79	7.06	6.292	6.568	0.195816	0.250496
49.08	6.12	5.67	6.8	7.07	6.76	5.08	6.45	6.2	5.92	6.85	6.7	6.05	7.09	6.94	7.09	5	7.72	6.28	5.79	7.06	6.292	6.572	0.195816	0.251329
49.17	6.12	5.67	6.8	7.07	6.76	5.08	6.45	6.2	5.92	6.85	6.7	6.05	7.09	6.94	7.09	5	7.72	6.28	5.79	7.06	6.292	6.572	0.195816	0.251329
49.25	6.12	5.67	6.8	7.07	6.76	5.08	6.45	6.2	5.92	6.85	6.7	6.05	7.09	6.94	7.09	5	7.72	6.28	5.79	7.06	6.292	6.572	0.195816	0.251329
49.33	6.12	5.67	6.8	7.07	6.76	5.12	6.49	6.2	5.92	6.85	6.7	6.05	7.09	6.94	7.09	5	7.72	6.28	5.79	7.06	6.3	6.572	0.193483	0.251329
49.42	6.12	5.67	6.8	7.07	6.76	5.12	6.62	6.2	5.92	6.85	6.71	6.05	7.09	6.94	7.09	5	7.72	6.28	5.79	7.06	6.313	6.573	0.195329	0.251387
49.5	6.12	5.67	6.81	7.07	6.76	5.12	6.62	6.2	5.92	6.85	6.71	6.05	7.09	6.94	7.09	5	7.73	6.28	5.8	7.06	6.314	6.575	0.195608	0.251552
49.58	6.12	5.67	6.81	7.07	6.76	5.12	6.62	6.2	5.92	6.85	6.71	6.05	7.09	6.94	7.09	5	7.73	6.28	5.8	7.06	6.314	6.575	0.195608	0.251552
49.67	6.12	5.67	6.81	7.07	6.76	5.12	6.62	6.2	5.92	6.85	6.71	6.05	7.09	6.94	7.09	5	7.73	6.28	5.8	7.06	6.314	6.575	0.195608	0.251552
49.75	6.12	5.67	6.81	7.07	6.76	5.12	6.62	6.2	5.92	6.85	6.71	6.05	7.09	6.94	7.09	5	7.73	6.28	5.8	7.06	6.314	6.575	0.195608	0.251552
49.83	6.12	5.67	6.81	7.07	6.76	5.12	6.62	6.2	5.92	6.85	6.71	6.05	7.09	6.94	7.09	5	7.73	6.28	5.8	7.06	6.314	6.575	0.195608	0.251552
49.92	6.26	5.67	6.81	7.07	6.76	5.12	6.62	6.2	5.92	6.85	6.75	6.05	7.09	6.94	7.09	5	7.73	6.29	5.8	7.06	6.328	6.58	0.194564	0.251692
50	6.26	5.67	6.81	7.07	6.76	5.12	6.62	6.2	5.92	6.85	6.76	6.05	7.09	6.94	7.19	5	7.73	6.29	5.8	7.06	6.328	6.591	0.194564	0.254202
50.08	6.26	5.67	6.81	7.07	6.76	5.12	6.62	6.2	5.92	6.85	6.76	6.05	7.09	6.94	7.19	5	7.73	6.29	5.8	7.06	6.328	6.591	0.194564	0.254202
50.17	6.26	5.67	6.81	7.07	6.76	5.12	6.62	6.2	5.92	6.85	6.76	6.05	7.09	6.94	7.19	5	7.73	6.29	5.8	7.08	6.328	6.593	0.194564	0.25462
50.25	6.26	5.67	6.81	7.07	6.76	5.12	6.62	6.21	5.92	6.85	6.76	6.05	7.09	6.94	7.19	5	7.73	6.29	5.8	7.08	6.329	6.593	0.194493	0.25462
50.33	6.26	5.67	6.81	7.07	6.76	5.12	6.62	6.21	5.92	6.85	6.76	6.05	7.09	6.94	7.19	5	7.73	6.29	5.8	7.08	6.329	6.593	0.194493	0.25462
50.42	6.26	5.67	6.81	7.07	6.76	5.12	6.62	6.21	5.92	6.85	6.76	6.05	7.09	6.94	7.19	5	7.73	6.3	5.8	7.08	6.329	6.594	0.194493	0.254489
50.5	6.27	5.67	6.81	7.07	6.78	5.12	6.62	6.21	5.92	6.85	6.76	6.05	7.09	6.95	7.19	5	7.73	6.3	5.8	7.08	6.332	6.595	0.194958	0.254642
50.58	6.27	5.67	6.81	7.07	6.78	5.12	6.62	6.21	5.92	6.85	6.76	6.05	7.09	6.95	7.19	5	7.73	6.3	5.8	7.08	6.332	6.595	0.194958	0.254642
50.67	6.27	5.67	6.81	7.07	6.78	5.12	6.62	6.21	5.93	6.85	6.76	6.05	7.09	6.95	7.19	5	7.73	6.3	5.8	7.08	6.333	6.595	0.194725	0.254642
50.75	6.27	5.67	6.81	7.07	6.78	5.12	6.62	6.21	5.93	6.85	6.76	6.05	7.09	7.04	7.19	5	7.73	6.3	5.8	7.08	6.333	6.604	0.194725	0.256191
50.83	6.27	5.67	6.81	7.07	6.78	5.12	6.62	6.21	5.93	6.85	6.76	6.05	7.09	7.09	7.19	5	7.73	6.3	5.8	7.08	6.333	6.609	0.194725	0.257183
50.92	6.27	5.67	6.81	7.07	6.78	5.12	6.62	6.21	5.93	6.85	6.84	6.05	7.09	7.09	7.19	5	7.73	6.3	5.83	7.08	6.333	6.62	0.194725	0.256788
51	6.27	5.67	6.81	7.07	6.78	5.12	6.62	6.21	5.98	6.85	6.9	6.05	7.09	7.09	7.19	5	7.73	6.3	5.84	7.08	6.338	6.627	0.193637	0.257086
51.08	6.27	5.67	6.94	7.07	6.78	5.12	6.62	6.21	6.13	6.85	6.9	6.05	7.09	7.09	7.21	5	7.73	6.3	5.84	7.08	6.366	6.629	0.194977	0.25758
51.17	6.27	5.67	6.94	7.07	6.78	5.12	6.62	6.21	6.15	6.85	6.9	6.05	7.09	7.1	7.21	5	7.73	6.3	5.84	7.08	6.368	6.63	0.194718	0.257781
51.25	6.27	5.67	6.94	7.07	6.78	5.12	6.62	6.21	6.15	6.85	6.9	6.05	7.09	7.1	7.21	5	7.73	6.3	5.84	7.08	6.368	6.63	0.194718	0.257781
51.33	6.27	5.67	6.94	7.07	6.78	5.12	6.62	6.21	6.15	6.85	6.9	6.05	7.09	7.1	7.21	5	7.73	6.3	5.84	7.08	6.368	6.63	0.194718	0.257781
51.42	6.27	5.67	6.94	7.07	6.78	5.12	6.62	6.21	6.15	6.93	6.9	6.19	7.09	7.1	7.21	5	7.73	6.3	5.84	7.08	6.376	6.644	0.197069	0.254642
51.5	6.27	5.67	6.95	7.07	6.78	5.12	6.62	6.21	6.15	6.93	6.9	6.19	7.09	7.1	7.21	5	7.73	6.3	5.84	7.08	6.377	6.644	0.197389	0.254642
51.58	6.27	5.67	6.95	7.07	6.78	5.12	6.62	6.24	6.15	6.93	6.9	6.19	7.09	7.1	7.21	5	7.73	6.35	5.84	7.08	6.38	6.649	0.197129	0.25394
51.67	6.27	5.67	6.95	7.07	6.78	5.12	6.62	6.36	6.15	6.93	6.9	6.19	7.09	7.1	7.21	5	7.73	6.47	5.84	7.17	6.392	6.67	0.196547	0.254462
51.75	6.27	5.67	6.96	7.07	6.78	5.13	6.62	6.37	6.15	6.93	6.9	6.19	7.09	7.1	7.21	5.06	7.73	6.47	5.84	7.17	6.395	6.676	0.196131	0.250121
51.83	6.27	5.73	7.09	7.15	6.78	5.14	6.62	6.37	6.15	6.93	6.9	6.19	7.09	7.1	7.21	5.06	7.73	6.47	5.84	7.17	6.423	6.676	0.20066	0.250121
51.92	6.27	5.75	7.1	7.22	6.78	5.18	6.62	6.37	6.15	6.93	6.9	6.19	7.09	7.1	7.21	5.06	7.73	6.47	5.84	7.17	6.437	6.676	0.200378	0.250121
52	6.27	5.75	7.1	7.22	6.78	5.19	6.62	6.37	6.15	6.93	6.9	6.19	7.09	7.1	7.21	5.06	7.73	6.47	5.84	7.17	6.438	6.676	0.199682	0.250121
52.08	6.27	5.75	7.1	7.22	6.79	5.19	6.62	6.37	6.15	6.93	6.9	6.19	7.09	7.1	7.21	5.06	7.73	6.47	5.84	7.18	6.439	6.677	0.199875	0.250342
52.17	6.27	5.75	7.1	7.22	6.79	5.19	6.62	6.37	6.15	6.93	6.9	6.19	7.09	7.1	7.21	5.06	7.73	6.47	5.84	7.18	6.439	6.677	0.199875	0.250342
52.25	6.29	5.75	7.1	7.22	6.79	5.19	6.62	6.37	6.15	6.93	6.9	6.19	7.09	7.1	7.21	5.06	7.73	6.47	5.84	7.18	6.441	6.677	0.199697	0.250342
52.33	6.29	5.75	7.1	7.22	6.79	5.19	6.62	6.37	6.15	6.93	6.9	6.19	7.09	7.1	7.21	5.06	7.73	6.47	5.84	7.18	6.441	6.677	0.199697	0.250342
52.42	6.29	5.75	7.1	7.22	6.79	5.2	6.68	6.37	6.15	6.93	6.9	6.19	7.09	7.11	7.21	5.07	7.79	6.47	5.86	7.22	6.448	6.691	0.199688	0.252839
52.5	6.29	5.75	7.12	7.22	6.87	5.2	6.78	6.37	6.15	6.93	6.91	6.26	7.09	7.12	7.21	5.07	7.93	6.47	6.01	7.25	6.468	6.732	0.203545	0.254239
52.58	6.29	5.75	7.12	7.22	6.99	5.2	6.78	6.37	6.15	6.93	6.92	6.45	7.09	7.12	7.21	5.07	7.93	6.47	6.01	7.25	6.48	6.752	0.206511	0.251081
52.67	6.29	5.75	7.12	7.22	7.01	5.2	6.78	6.37	6.15	6.93	6.92	6.51	7.2	7.12	7.21	5.07	8.04	6.53	6.01	7.25	6.482	6.786	0.207068	0.257273
52.75	6.31	5.83	7.12	7.22	7.01	5.21	6.8	6.37	6.15	6.93	6.92	6.53	7.38	7.12	7.22	5.07	8.04	6.58	6.01	7.25	6.495	6.812	0.203471	0.260482
52.83	6.31	5.83	7.12	7.24	7.02	5.24	6.82	6.37	6.15	6.94	6.92	6.53	7.41	7.12	7.35	5.07	8.04	6.65	6.01	7.25	6.504	6.835	0.203039	0.263136
52.92	6.31	5.84	7.12	7.31	7.03	5.26	6.83	6.37	6.15	6.94	6.93	6.53	7.43	7.12	7.35	5.07	8.04	6.66	6.02	7.25	6.516	6.84	0.204669	0.26324
53	6.33	5.85	7.12	7.5	7.04	5.34	6.84	6.38	6.15	6.94	6.95	6.53	7.44	7.12	7.35	5.07	8.14	6.67	6.03	7.25	6.549	6.855	0.208036	0.268337
53.08	6.33	5.87	7.12	7.56	7.04	5.34	6.85	6.38	6.15	6.98	6.96	6.54	7.46	7.12	7.35	5.07	8.14	6.68	6.05	7.25	6.562	6.862	0.211407	0.267979
53.17	6.33	5.87	7.12	7.56	7.05	5.34	6.86	6.52	6.15	7.05	6.97	6.54	7.47	7.12	7.35	5.07	8.14	6.69	6.05	7.25	6.585	6.865	0.212515	0.268197
53.25	6.33	5.87	7.12	7.57	7.05	5.34	6.86	6.59	6.15	7.05	7.08	6.55	7.48	7.12	7.35	5.07	8.14	6.71	6.05	7.25	6.593	6.88	0.212901	0.268862
53.33	6.4	5.87	7.12	7.57	7.06	5.34	6.86	6.6	6.15	7.05	7.18	6.55	7.49	7.12	7.36	5.07	8.14	6.71	6.05	7.25	6.602	6.892	0.212288	0.270308
53.42	6.4	5.89	7.12	7.58	7.06	5.34	6.87	6.6	6.15	7.05	7.18	6.56	7.49	7.2	7.36	5.07	8.14	6.71	6.05	7.25	6.606	6.901	0.212175	0.271033
53.5	6.4	5.99	7.12	7.58	7.06	5.34	6.87	6.61	6.2	7.05	7.18	6.58	7.5	7.29	7.36	5.07	8.14	6.71	6.08	7.25	6.622	6.916	0.207438	0.2712
53.58	6.4	6.1	7.12	7.58	7.06	5.34	6.87	6.61	6.2	7.05	7.18	6.58	7.5	7.32	7.36	5.07	8.14	6.71	6.08	7.31	6.633	6.925	0.203977	0.272553
53.67	6.4	6.1	7.12	7.58	7.06	5.34	6.87	6.61	6.2	7.05	7.18	6.7	7.5	7.33	7.36	5.07	8.14	6.72	6.08	7.31	6.633	6.939	0.203977	0.271193
53.75	6.4	6.1	7.12	7.58	7.06	5.35	6.87	6.62	6.2	7.05	7.18	6.77	7.5	7.33	7.36	5.07	8.14	6.72	6.08	7.31	6.635	6.946	0.203264	0.270597
53.83	6.4	6.1	7.12	7.58	7.06	5.44	6.92	6.62	6.2	7.05	7.19	6.77	7.5	7.33	7.36	5.07	8.16	6.72	6.08	7.32	6.649	6.95	0.197745	0.271829
53.92	6.4	6.1	7.12	7.59	7.07	5.44	7.07	6.62	6.2	7.05	7.19	6.77	7.5	7.33	7.36	5.07	8.23	6.75	6.08	7.32	6.666	6.96	0.201308	0.275088
54	6.4	6.1	7.12	7.59	7.07	5.44	7.08	6.62	6.2	7.11	7.23	6.77	7.52	7.33	7.36	5.07	8.23	6.76	6.08	7.32	6.673	6.967	0.202885	0.275842
rate food intake (g/h) at 30C
mouse
genotype
	wt_1	wt_2	wt_3	wt_4	wt_5	wt_6	wt_7	wt_8	wt_9	wt_10	ko_1	ko_2	ko_3	ko_4	ko_5	ko_6	ko_7	ko_8	ko_9	ko_10
	Feed1	Feed1	Feed1	Feed1	Feed1	Feed1	Feed1	Feed1	Feed1	Feed1	Feed1	Feed1	Feed1	Feed1	Feed1	Feed1	Feed1	Feed1	Feed1	Feed1
	[g]	[g]	[g]	[g]	[g]	[g]	[g]	[g]	[g]	[g]	[g]	[g]	[g]	[g]	[g]	[g]	[g]	[g]	[g]	[g]	t.test
total food intake at 54.00 hours	6.4	6.1	7.12	7.59	7.07	5.44	7.08	6.62	6.2	7.11	7.23	6.77	7.52	7.33	7.36	5.07	8.23	6.76	6.08	7.32	0.401853
grams food/hour	0.118519	0.112963	0.131852	0.140556	0.130926	0.100741	0.131111	0.122593	0.114815	0.131667	0.133889	0.12537	0.139259	0.135741	0.136296	0.0938889	0.152407	0.125185	0.112593	0.135556	0.401853
	Feed1
	[g]
	WT	AVG	SEM		mKO	AVG	SEM
	total	6.673	0.202885		total	6.967	0.275842
	g/h	0.123574	0.00375713		g/h	0.129019	0.00510819

## Sheet: Fig.7G
wheel rotations at 30C		WT										mKO																						X+Y beam breaks (counts) at 30C		WT										mKO
	genotype	wt_1	wt_2	wt_3	wt_4	wt_5	wt_6	wt_7	wt_8	wt_9	wt_10	ko_1	ko_2	ko_3	ko_4	ko_5	ko_6	ko_7	ko_8	ko_9	ko_10														genotype	wt_1	wt_2	wt_3	wt_4	wt_5	wt_6	wt_7	wt_8	wt_9	wt_10	ko_1	ko_2	ko_3	ko_4
	Time (hr)	[Rot]	[Rot]	[Rot]	[Rot]	[Rot]	[Rot]	[Rot]	[Rot]	[Rot]	[Rot]	[Rot]	[Rot]	[Rot]	[Rot]	[Rot]	[Rot]	[Rot]	[Rot]	[Rot]	[Rot]														Time (hr)	[Cnts]	[Cnts]	[Cnts]	[Cnts]	[Cnts]	[Cnts]	[Cnts]	[Cnts]	[Cnts]	[Cnts]	[Cnts]	[Cnts]	[Cnts]	[Cnts]
	0	0	0	0	0	0	0	0	0	0	0	0	0	0	0	0	0	0	0	0	0														0	36	126	0	9	1	7	10	57	297	89	212	0	30	159
	0.08	0	0	0	0	0	0	0	0	0	0	0	0	0	0	0	0	0	0	0	0														0.08	45	33	0	27	0	5	13	34	17	98	148	2	58	150
	0.17	0	0	0	0	0	0	0	0	0	0	0	0	0	0	0	0	0	0	0	0														0.17	64	47	3	36	0	0	0	19	9	642	42	2	43	79
	0.25	0	0	0	0	0	0	0	0	0	0	0	0	0	0	0	0	0	4	0	0														0.25	172	25	25	0	0	0	5	10	38	403	82	1	51	16
	0.33	0	0	0	0	0	0	0	0	0	0	0	0	0	0	0	0	0	0	0	0														0.33	252	34	0	41	2	0	3	4	15	33	1	6	42	10
	0.42	0	0	0	0	0	0	0	0	0	0	0	0	0	0	0	0	0	0	0	0														0.42	120	18	97	6	4	0	3	3	12	33	6	33	35	44
	0.5	0	0	0	0	0	0	0	0	0	0	0	0	0	0	0	0	0	0	0	0														0.5	49	35	137	7	0	0	137	19	37	16	0	32	37	0
	0.58	0	0	0	0	0	0	0	0	0	0	0	0	0	0	0	0	0	0	0	0														0.58	40	22	77	1	10	0	33	37	114	22	0	2	37	0
	0.67	0	0	0	0	0	0	0	0	0	0	0	0	0	0	0	0	0	0	0	0														0.67	40	21	112	9	7	0	0	9	11	81	12	0	31	90
	0.75	0	0	0	0	0	0	0	0	0	0	0	0	0	0	0	0	0	0	0	0														0.75	41	26	0	1	13	0	5	4	12	62	3	57	36	14
	0.83	0	0	0	0	0	0	0	0	0	0	0	0	0	0	0	0	0	0	0	0														0.83	132	21	0	15	44	1	58	12	56	15	15	91	35	14
	0.92	0	0	0	0	0	0	0	0	0	0	0	0	0	0	0	0	0	0	0	0														0.92	296	46	0	11	148	0	14	10	108	21	12	62	146	22
	1	0	0	0	0	0	0	0	0	0	0	0	0	0	0	0	0	0	0	0	0														1	237	27	1	4	209	0	0	173	87	142	12	129	310	11
	1.08	0	0	0	0	0	0	0	0	0	0	0	0	0	0	0	0	0	0	0	0														1.08	331	24	79	3	149	9	0	203	74	409	0	232	259	10
	1.17	0	0	0	0	2	0	0	0	0	27	0	2	0	0	0	0	0	0	0	0														1.17	158	25	0	1	318	3	0	118	28	353	8	185	370	3
	1.25	0	0	0	0	0	0	0	0	0	0	0	2	0	0	0	0	0	0	0	0														1.25	48	23	0	0	150	150	0	23	36	554	1	151	107	0
	1.33	0	0	0	0	0	0	0	0	0	0	0	0	0	0	0	0	0	0	0	0														1.33	51	30	18	0	32	125	140	6	84	451	6	7	38	2
	1.42	0	0	0	0	0	11	0	0	0	0	0	0	0	0	0	0	0	0	0	0														1.42	39	19	4	15	16	1176	181	0	184	66	268	7	46	80
	1.5	0	0	0	0	0	0	0	0	0	0	0	0	0	0	0	0	0	0	0	0														1.5	79	85	5	91	0	243	79	16	223	2	295	11	37	229
	1.58	0	0	0	0	0	0	0	0	102	0	0	0	0	0	0	0	0	0	2	0														1.58	41	182	81	98	0	29	118	9	2592	6	63	30	25	114
	1.67	0	0	0	0	0	0	0	0	11	0	0	0	0	0	0	0	0	0	0	0														1.67	36	289	162	262	0	0	209	12	640	5	5	41	23	222
	1.75	0	2	0	0	0	0	0	0	18	0	0	0	0	0	0	0	0	0	0	0														1.75	44	664	81	555	5	2	351	1	568	7	23	3	26	0
	1.83	0	8	0	0	0	0	0	0	0	0	0	0	0	0	0	0	0	0	0	0														1.83	85	479	56	489	4	0	104	186	213	27	4	2	97	1
	1.92	0	0	0	0	0	0	0	0	0	0	0	0	0	0	0	0	0	0	0	0														1.92	42	199	85	384	0	440	11	84	44	6	14	10	50	4
	2	0	0	2	0	0	0	0	0	0	0	0	0	0	0	0	0	0	0	0	0														2	56	108	239	282	11	67	11	94	41	6	8	22	31	0
	2.08	0	0	0	0	0	0	0	0	0	0	0	0	0	0	0	0	0	0	0	0														2.08	81	15	2	77	0	361	13	247	42	13	18	13	69	0
	2.17	0	0	0	0	0	0	0	0	0	0	0	0	0	0	0	0	0	0	0	0														2.17	212	17	13	5	0	295	26	1	56	11	2	62	57	0
	2.25	0	0	0	0	0	0	0	0	0	0	0	0	0	0	0	0	0	0	0	0														2.25	170	29	0	1	1	38	10	6	60	233	6	13	27	1
	2.33	0	0	0	0	0	0	0	0	0	0	0	0	0	0	0	0	0	0	0	0														2.33	30	27	0	401	0	63	13	1	43	688	8	40	31	10
	2.42	0	0	0	0	0	0	0	0	0	0	0	0	0	0	0	0	0	58	0	0														2.42	44	10	0	489	3	107	4	8	32	500	98	9	32	4
	2.5	0	0	0	0	0	0	0	0	0	69	0	0	0	0	0	0	0	121	0	0														2.5	34	12	7	445	1	16	13	10	38	816	10	231	36	16
	2.58	0	0	0	0	0	0	0	0	0	0	0	0	0	0	0	0	0	119	0	0														2.58	38	9	6	39	0	0	4	0	55	263	182	0	25	9
	2.67	0	0	0	0	0	0	0	0	0	0	0	0	0	0	0	0	0	0	0	0														2.67	32	13	1	76	136	19	1	7	54	151	299	1	40	3
	2.75	0	0	0	0	0	0	0	0	0	0	9	0	0	0	0	0	0	0	0	29														2.75	170	21	3	20	135	0	3	46	60	41	496	51	43	14
	2.83	0	0	0	0	0	0	0	0	0	0	8	0	0	0	0	0	0	0	0	0														2.83	153	16	0	209	96	285	1	21	34	0	542	141	32	64
	2.92	0	0	0	0	0	0	0	0	0	0	0	0	0	0	0	0	0	0	0	0														2.92	138	27	0	18	0	1999	0	48	40	0	198	164	21	81
	3	0	0	0	0	0	0	0	0	0	0	0	0	0	0	0	0	0	0	0	0														3	105	106	28	16	2	0	13	89	36	70	104	181	27	144
	3.08	0	0	0	0	0	2	0	8	0	0	0	0	0	2	0	0	0	0	0	0														3.08	67	190	86	33	0	176	1	589	45	1	3	114	124	342
	3.17	0	0	0	0	0	0	0	0	0	0	0	0	0	0	0	0	0	0	0	0														3.17	134	303	130	406	0	0	0	456	204	3	0	1	126	389
	3.25	0	8	0	0	0	0	0	0	0	0	0	0	0	0	0	0	2	0	0	0														3.25	39	644	0	450	0	0	106	579	189	15	10	21	329	229
	3.33	0	0	0	0	0	0	0	10	0	0	0	0	0	0	0	0	0	0	0	0														3.33	53	344	3	457	6	7	286	638	532	530	5	1	280	51
	3.42	0	0	0	0	0	0	0	0	0	0	0	0	2	0	0	0	0	0	0	0														3.42	57	291	9	129	6	1	262	116	533	214	15	0	357	37
	3.5	0	0	0	0	0	0	0	0	12	8	0	0	0	0	0	0	0	0	0	0														3.5	152	210	2	98	4	2	100	20	708	791	5	40	174	39
	3.58	0	0	0	0	0	0	0	0	63	0	0	0	0	0	0	0	0	0	0	0														3.58	221	181	8	3	0	0	18	5	1298	529	65	16	102	118
	3.67	0	0	0	0	0	0	0	0	0	0	0	0	0	0	0	0	0	0	0	0														3.67	185	146	6	10	5	40	0	11	89	566	215	5	93	51
	3.75	0	0	0	0	0	0	0	0	0	0	0	0	0	0	0	0	0	0	0	0														3.75	81	21	59	0	0	70	18	1	25	11	70	2	20	45
	3.83	0	0	15	0	0	0	0	0	0	0	0	0	0	0	0	0	0	0	0	0														3.83	36	41	511	0	2	0	0	126	0	13	76	25	31	38
	3.92	0	0	0	0	0	0	0	0	0	0	0	0	0	0	0	0	0	0	0	0														3.92	40	15	160	9	12	1	1	208	9	16	4	38	32	28
	4	0	0	0	0	0	0	0	0	0	0	0	0	0	0	0	0	0	0	2	0														4	39	27	154	0	1	0	1	0	0	2	18	148	17	38
	4.08	0	0	0	0	0	0	0	0	0	0	0	0	0	0	0	0	0	0	0	0														4.08	42	22	69	0	125	2	0	2	5	9	0	140	8	66
	4.17	0	0	0	0	0	0	0	0	0	0	0	9	0	0	0	0	0	0	0	0														4.17	44	20	123	46	142	9	5	5	2	0	52	285	30	34
	4.25	0	0	0	0	0	0	0	0	0	0	0	24	0	0	0	0	0	0	0	0														4.25	83	19	0	0	380	23	2	2	1	23	6	276	22	149
	4.33	0	0	0	0	0	0	0	0	0	0	0	18	0	0	0	0	0	0	0	0														4.33	204	37	0	0	238	30	6	4	9	22	19	234	23	145
	4.42	0	0	0	0	95	0	0	0	0	0	0	2	0	3	0	0	0	9	0	0														4.42	184	36	20	0	2811	78	46	0	13	0	2	105	15	408
	4.5	0	0	0	0	20	0	0	0	0	0	0	0	0	0	0	0	0	8	0	0														4.5	41	43	1	15	803	351	173	4	33	1	0	114	21	120
	4.58	0	0	0	0	0	4	0	0	0	0	0	0	0	0	0	0	0	0	0	0														4.58	47	57	0	0	259	492	172	10	35	302	3	26	30	156
	4.67	0	0	0	0	0	0	0	0	0	0	0	0	0	0	0	0	0	0	0	0														4.67	39	168	0	40	293	2	244	11	0	569	0	0	17	56
	4.75	0	0	0	0	0	0	0	0	0	15	0	0	0	0	0	0	0	0	0	0														4.75	200	80	0	239	204	0	50	49	24	560	0	0	15	102
	4.83	3	0	0	0	0	0	0	0	0	0	0	0	0	0	0	0	0	0	0	4														4.83	449	26	77	58	0	3	1	133	3	219	27	42	37	146
	4.92	0	0	0	0	0	0	0	0	0	0	0	0	0	0	0	0	0	0	0	0														4.92	55	14	306	16	0	0	3	131	2	101	76	13	240	0
	5	0	0	0	0	0	0	0	0	0	0	0	0	0	0	0	5	0	0	0	0														5	33	37	76	212	7	0	15	355	6	72	163	3	164	0
	5.08	0	0	0	0	0	0	0	10	0	0	0	0	4	0	0	0	0	0	0	0														5.08	41	26	74	169	2	1	41	655	7	0	19	71	356	1
	5.17	0	0	0	0	0	0	0	0	0	0	0	0	0	0	0	0	0	0	0	0														5.17	49	39	213	112	3	0	19	92	115	29	136	38	26	20
	5.25	0	0	0	0	0	0	0	0	0	0	0	0	0	0	0	0	0	0	0	0														5.25	61	29	207	56	0	170	16	10	186	6	299	0	30	0
	5.33	0	0	0	0	0	2	0	0	3	0	0	0	0	0	0	0	0	0	0	0														5.33	73	25	0	12	0	550	99	15	336	2	49	4	34	18
	5.42	0	0	0	0	0	0	0	0	0	0	0	0	0	0	0	0	0	0	0	0														5.42	40	40	10	10	4	0	1	6	207	0	2	194	37	25
	5.5	0	0	0	0	0	0	0	0	2	0	0	0	0	0	0	0	0	0	2	0														5.5	41	37	70	5	0	13	25	21	85	6	1	175	24	89
	5.58	0	0	0	0	0	0	0	0	0	0	0	0	0	0	0	0	0	8	7	0														5.58	59	13	2	0	9	0	150	6	5	68	1	164	33	19
	5.67	0	0	0	0	0	0	0	0	0	0	0	0	0	0	0	0	0	0	0	0														5.67	115	116	42	0	2	0	27	7	15	205	12	29	99	145
	5.75	0	0	0	0	0	0	0	0	0	0	0	0	0	0	0	0	0	0	0	0														5.75	42	428	120	1	0	6	233	6	16	192	0	80	291	155
	5.83	0	0	0	0	0	0	0	0	0	0	0	0	0	0	0	0	0	0	0	0														5.83	140	17	49	14	1	21	212	18	12	53	18	64	118	58
	5.92	0	0	0	0	0	0	0	0	0	0	0	0	0	0	0	0	0	0	0	3														5.92	126	24	92	0	63	4	62	14	13	2	2	2	90	41
	6	0	0	0	0	0	0	0	0	0	0	0	0	0	0	0	7	0	0	0	0														6	245	31	65	156	187	45	5	1	6	7	85	1	24	16
	6.08	0	0	0	5	0	0	0	0	0	0	0	0	0	0	0	0	0	0	0	4														6.08	403	24	25	316	118	134	23	1	49	11	316	29	51	19
	6.17	0	0	0	8	0	0	0	0	0	0	25	0	0	0	0	0	0	0	0	0														6.17	383	155	15	732	249	321	38	21	36	19	1018	100	100	113
	6.25	0	0	0	0	0	0	0	0	0	0	0	0	0	0	0	0	0	0	0	0														6.25	116	150	31	83	55	35	3	85	136	61	59	137	148	293
	6.33	0	14	0	0	0	0	0	27	0	0	0	16	0	0	0	0	0	45	0	0														6.33	226	622	20	36	0	180	85	1118	97	372	63	126	194	224
	6.42	0	0	0	0	0	0	0	0	2	0	0	0	21	0	0	0	0	11	0	0														6.42	227	380	282	5	10	156	84	343	444	395	39	53	954	0
	6.5	0	0	0	0	0	32	0	0	130	43	0	0	10	0	0	0	8	32	0	0														6.5	371	445	50	50	62	1717	83	239	2960	708	62	155	434	86
	6.58	0	3	0	0	0	0	0	25	5	0	0	0	0	0	0	0	0	0	0	0														6.58	44	541	242	47	208	63	352	704	332	260	139	134	284	180
	6.67	0	0	0	0	0	0	0	0	0	0	0	0	0	0	0	0	0	0	0	78														6.67	337	107	169	143	356	0	90	144	344	460	170	111	184	98
	6.75	0	0	0	14	82	0	0	0	0	250	0	0	21	0	0	0	0	25	21	145														6.75	62	156	58	502	1782	0	177	13	202	347	20	4	557	84
	6.83	0	0	0	0	194	0	0	0	74	214	5	7	0	45	0	160	15	0	10	211														6.83	298	26	117	0	3850	115	197	75	1705	357	318	54	60	1540
	6.92	2	0	0	0	202	22	0	0	329	162	0	0	0	131	0	315	21	0	0	178														6.92	280	171	45	45	3769	1223	201	6	4999	526	65	0	73	3223
	7	0	2	0	0	0	0	0	0	210	188	0	0	0	28	0	339	0	0	0	95														7	136	532	23	63	294	222	95	0	3364	278	357	155	339	875
	7.08	0	8	0	2	0	6	0	0	249	0	61	2	6	0	0	167	0	0	0	266														7.08	145	646	114	221	174	1035	82	167	3611	390	1494	31	541	92
	7.17	0	0	0	6	45	0	0	0	0	13	27	0	0	0	0	0	0	27	3	83														7.17	531	660	207	479	1355	10	152	916	220	511	1008	6	29	2
	7.25	0	0	41	0	221	0	0	0	0	310	0	0	0	0	0	0	0	180	4	241														7.25	453	920	699	137	4218	35	107	73	30	225	271	155	124	249
	7.33	0	6	45	0	58	0	0	0	0	52	2	22	0	34	0	0	0	167	0	47														7.33	599	1114	1010	55	1798	4	170	25	185	90	307	185	176	1382
	7.42	0	50	98	185	0	0	0	0	18	2	0	17	17	0	0	0	0	0	0	0														7.42	441	1456	759	3004	32	118	171	625	1105	75	5	334	665	77
	7.5	0	48	93	201	0	22	0	0	47	6	0	2	15	0	0	6	5	0	0	47														7.5	64	1700	982	3857	82	1050	163	928	1953	44	167	5	936	18
	7.58	0	102	0	91	0	53	0	0	0	0	0	0	0	0	0	0	0	24	17	380														7.58	268	2271	114	2226	29	2461	84	559	283	45	175	316	164	105
	7.67	0	269	0	0	0	21	0	0	0	0	3	0	0	0	0	0	0	134	35	157														7.67	434	3626	123	165	200	1221	82	248	149	68	173	448	138	389
	7.75	0	106	47	0	0	4	0	50	5	0	0	0	0	81	0	0	0	179	42	223														7.75	69	1584	482	218	201	434	199	1443	408	594	210	103	158	2182
	7.83	0	0	0	0	25	0	0	53	145	5	0	0	0	227	0	0	0	16	76	277														7.83	309	329	338	209	1156	29	517	2089	4499	196	179	18	114	5540
	7.92	0	0	0	0	148	0	0	5	87	0	2	0	0	31	0	146	0	0	38	158														7.92	280	394	127	149	3640	44	467	433	2833	29	125	73	135	883
	8	0	0	0	0	179	0	0	0	96	0	0	12	0	0	0	191	25	8	2	11														8	56	370	69	391	3868	100	588	38	2290	130	28	130	51	436
	8.08	0	57	0	57	0	0	0	0	0	0	6	0	0	102	0	185	0	0	12	141														8.08	467	1051	64	1363	160	19	389	58	10	53	180	3	87	2747
	8.17	0	94	0	0	0	0	0	0	0	51	0	7	0	0	0	63	0	0	16	302														8.17	481	1557	68	77	8	314	298	36	0	510	193	60	125	0
	8.25	0	55	0	0	0	14	0	0	0	97	9	21	0	0	0	7	0	0	0	304														8.25	160	1088	82	38	153	950	133	70	9	298	298	114	185	318
	8.33	0	230	0	0	0	55	0	0	0	328	5	35	0	0	0	0	0	0	0	385														8.33	356	2848	21	136	4	1693	90	231	18	442	196	283	179	162
	8.42	0	30	0	0	0	109	0	0	0	176	13	0	0	0	0	0	0	0	0	299														8.42	271	907	92	233	2	3946	59	289	0	661	374	78	48	13
	8.5	0	9	0	0	0	23	0	5	0	266	0	0	0	0	0	0	0	0	0	184														8.5	86	473	45	44	14	1002	99	415	92	452	77	502	57	54
	8.58	0	0	0	0	0	0	0	33	0	121	0	45	0	0	0	0	0	0	0	217														8.58	266	161	115	97	3	15	0	1367	41	658	176	464	50	56
	8.67	0	0	0	0	0	0	0	69	111	280	2	82	7	0	0	109	23	0	0	0														8.67	528	86	15	207	2	0	35	2663	3558	401	201	457	484	181
	8.75	0	0	0	0	0	0	0	60	214	335	20	98	16	0	0	124	23	40	0	0														8.75	82	232	227	57	151	0	114	2354	4053	288	805	590	520	89
	8.83	0	0	28	0	0	5	0	12	52	19	4	73	0	0	0	332	7	189	42	0														8.83	224	379	484	21	197	605	14	580	1252	1354	231	411	70	21
	8.92	0	0	78	0	0	0	0	0	0	332	5	0	0	0	0	8	106	142	4	265														8.92	215	338	1306	295	171	117	159	169	132	170	270	64	175	25
	9	0	0	161	0	0	33	0	0	24	12	6	0	0	0	0	0	81	147	33	365														9	561	335	1614	95	130	1761	198	172	694	401	296	56	230	286
	9.08	0	110	129	0	0	66	0	0	133	284	0	0	0	27	81	0	0	4	64	220														9.08	42	1923	1729	64	26	3588	220	102	2678	186	86	148	91	1198
	9.17	0	85	35	0	0	96	0	0	0	174	0	0	0	46	262	0	0	0	50	271														9.17	65	1353	1088	85	11	4324	348	2	220	678	124	310	49	1372
	9.25	2	192	7	0	0	48	0	0	0	13	7	3	0	141	0	135	0	0	0	141														9.25	237	3153	200	293	93	1702	430	30	26	60	370	86	58	3923
	9.33	0	147	0	0	0	0	0	0	0	0	0	43	0	116	0	310	18	0	5	286														9.33	103	2348	160	27	0	53	354	53	245	553	45	382	132	3046
	9.42	0	5	0	0	0	0	0	0	13	0	18	24	0	142	0	414	0	0	0	150														9.42	223	608	198	135	66	0	291	494	689	596	793	257	132	3588
	9.5	0	0	0	0	0	0	0	0	25	151	117	84	0	201	0	378	36	3	0	268														9.5	111	257	136	88	10	0	376	468	674	746	2768	548	92	4346
	9.58	0	11	0	0	0	2	0	29	0	277	98	143	0	54	0	296	0	43	0	119														9.58	272	408	20	62	92	178	398	1489	101	646	2489	741	28	1535
	9.67	0	9	0	58	0	104	0	17	50	389	194	37	0	0	0	0	0	236	5	0														9.67	285	519	40	1308	233	4071	270	885	1528	202	3233	359	62	102
	9.75	6	142	0	180	0	24	0	35	12	387	205	47	0	0	0	0	0	253	10	19														9.75	332	2106	5	2823	7	2188	348	1291	405	336	3156	402	215	5
	9.83	0	62	0	124	0	2	0	0	0	393	177	29	0	0	0	0	0	166	49	9														9.83	237	1289	139	2555	2	957	257	528	19	468	2689	460	35	338
	9.92	0	0	0	29	0	0	0	8	0	307	110	26	0	0	0	0	0	55	60	163														9.92	339	54	88	785	89	451	151	726	61	355	2359	198	212	196
	10	0	0	0	0	29	2	0	0	0	317	85	0	19	0	245	0	9	138	2	0														10	103	29	15	368	1150	474	0	167	10	345	2665	22	634	201
	10.08	0	0	0	0	175	0	0	26	0	189	205	21	45	0	279	0	26	209	0	0														10.08	60	310	70	482	3726	27	108	1338	39	289	3508	259	1271	70
	10.17	0	0	39	0	119	0	0	0	0	166	23	0	28	0	0	0	100	170	0	0														10.17	114	296	658	326	2834	2	411	687	17	852	934	53	1154	0
	10.25	0	0	0	0	32	0	0	14	0	82	171	0	43	0	0	0	63	8	120	0														10.25	155	208	102	28	1293	185	563	1122	19	238	3270	13	1186	97
	10.33	0	7	0	0	22	47	0	18	0	96	31	0	2	0	61	0	86	0	176	0														10.33	196	375	110	38	727	2449	219	878	41	83	1172	22	265	8
	10.42	0	133	0	0	0	93	0	0	0	345	0	0	0	0	346	18	116	9	77	0														10.42	259	2807	0	146	235	3421	304	273	177	308	174	323	337	272
	10.5	0	232	0	10	60	9	0	0	24	400	6	32	0	5	91	59	28	0	0	0														10.5	281	3141	10	642	1574	1029	281	164	1106	278	381	251	256	300
	10.58	0	136	0	83	0	0	0	0	0	459	50	91	2	0	0	290	6	33	129	77														10.58	89	1976	0	2140	263	31	108	96	8	287	1802	555	273	48
	10.67	0	11	0	95	0	0	0	0	0	278	155	77	2	0	0	292	0	0	165	188														10.67	182	678	81	2163	180	140	19	124	0	192	3506	573	181	99
	10.75	4	0	0	0	0	18	0	0	0	208	235	133	0	93	0	22	0	0	27	224														10.75	642	220	70	119	132	748	150	54	7	262	4302	563	63	2793
	10.83	0	20	0	0	0	78	0	0	0	162	35	77	0	82	0	0	0	0	0	123														10.83	276	642	40	239	71	3006	500	5	732	403	933	485	86	2054
	10.92	0	0	0	12	0	57	0	0	0	347	4	11	0	32	0	3	9	0	0	0														10.92	55	227	87	838	248	2938	553	15	495	242	396	326	61	898
	11	0	2	21	0	0	0	0	0	59	238	4	22	14	223	0	20	38	0	0	0														11	138	56	352	250	0	348	337	3	2026	632	288	266	871	5186
	11.08	0	0	14	0	0	0	0	0	184	0	9	0	0	268	0	110	50	0	0	43														11.08	193	30	408	96	70	224	224	30	4086	645	334	136	258	6095
	11.17	0	0	121	0	0	0	0	0	8	0	5	0	0	315	0	0	5	0	0	269														11.17	68	27	1884	58	3	0	41	4	810	296	268	177	120	6571
	11.25	0	0	204	0	0	0	0	0	84	14	0	32	0	40	0	0	0	0	0	166														11.25	117	19	2073	513	2	20	0	5	2280	175	11	437	197	1355
	11.33	2	0	210	0	36	0	0	0	96	0	0	55	0	156	0	0	0	0	0	265														11.33	340	28	2349	147	1167	3	0	56	2291	71	95	413	254	3217
	11.42	0	0	131	0	100	0	0	0	297	0	0	28	39	0	0	196	0	0	0	2														11.42	1217	12	1792	144	3425	5	2	166	5086	127	110	263	908	654
	11.5	73	0	138	11	127	12	0	0	56	0	0	0	77	0	0	294	0	77	0	0														11.5	2591	19	1729	456	3582	927	348	506	2334	32	185	2	1522	203
	11.58	128	0	0	16	186	2	0	0	0	0	0	0	121	0	0	475	0	185	0	0														11.58	3040	217	505	536	3725	298	196	443	72	41	212	1	1625	51
	11.67	127	0	12	155	34	35	0	0	0	0	7	0	80	0	0	2	0	207	0	0														11.67	2912	162	500	3328	971	2151	100	344	572	32	861	265	1638	9
	11.75	172	0	5	140	0	0	0	0	0	0	64	29	73	0	0	0	0	127	0	0														11.75	3105	420	517	3006	149	217	137	315	928	31	1775	275	1470	69
	11.83	46	0	39	50	140	0	0	27	46	0	104	7	112	0	0	0	0	239	3	0														11.83	1662	171	922	1400	3303	325	92	1134	1714	35	2323	76	1654	127
	11.92	125	115	0	0	231	52	0	0	0	0	22	0	51	0	0	77	0	187	0	0														11.92	2662	1887	329	35	4369	2280	0	116	453	39	696	0	870	228
	12	94	70	0	0	201	0	0	0	0	0	109	0	20	72	0	257	0	80	0	0														12	2094	1398	550	48	4062	149	0	93	564	56	2408	30	621	1997
	12.08	15	0	0	0	12	0	0	0	115	0	79	0	92	278	0	383	0	8	0	0														12.08	1065	28	1008	39	594	299	519	15	2961	34	1432	2	1321	5301
	12.17	151	0	0	0	0	0	0	0	98	0	109	0	0	257	0	405	0	0	0	0														12.17	2455	27	329	141	130	27	367	13	5666	37	2836	9	207	3718
	12.25	35	0	0	15	0	0	0	0	0	0	12	0	48	135	0	65	0	10	4	0														12.25	844	35	85	585	7	3	154	13	5220	68	507	1	1007	2462
	12.33	124	0	0	0	0	0	0	0	0	0	18	0	116	0	0	0	2	0	0	0														12.33	2510	39	30	62	15	2	309	53	4516	168	609	117	1624	565
	12.42	111	0	0	0	0	0	0	0	0	0	0	0	100	0	0	0	39	0	0	0														12.42	2444	32	44	127	265	6	485	32	4202	123	122	92	1409	381
	12.5	133	0	0	0	0	0	0	0	0	222	0	0	186	19	0	8	0	3	0	0														12.5	2730	94	146	40	6	22	218	125	4108	131	136	7	2327	917
	12.58	53	0	0	0	0	0	0	6	0	367	0	0	134	153	0	0	0	0	0	0														12.58	1859	38	114	0	0	10	58	496	4585	629	81	26	1947	3362
	12.67	64	0	0	0	0	0	0	0	0	99	0	0	141	280	0	0	0	0	0	0														12.67	1631	83	3	237	7	18	0	94	3404	540	21	186	1908	5274
	12.75	116	0	0	55	0	0	0	0	295	497	0	4	96	385	0	0	0	0	22	0														12.75	2315	202	8	1743	54	0	114	0	6651	268	0	139	1603	7347
	12.83	172	12	0	37	0	0	0	0	268	261	0	63	0	375	0	0	0	3	46	0														12.83	2425	704	119	1534	191	5	131	28	6766	457	257	537	301	6830
	12.92	156	0	18	0	0	0	0	0	390	0	0	55	21	378	0	0	0	0	16	0														12.92	2574	27	377	175	4	434	3	10	5923	48	66	421	474	7274
	13	67	0	0	0	0	0	0	0	178	0	0	4	121	389	0	0	4	0	34	0														13	1430	31	211	27	3	251	10	16	3342	107	88	121	1589	7228
	13.08	0	0	0	0	0	0	0	0	123	0	0	0	165	49	0	158	2	26	0	63														13.08	279	51	138	11	0	94	49	137	1856	341	132	0	1855	1065
	13.17	0	0	0	0	0	19	0	0	2	0	0	0	129	0	0	309	0	0	0	64														13.17	682	15	34	76	71	1181	4	188	261	555	144	2	1743	395
	13.25	0	0	0	0	15	15	0	0	388	0	0	0	95	42	0	248	0	4	0	63														13.25	413	46	7	155	674	1155	2	271	6930	278	18	111	1040	1997
	13.33	59	0	0	0	37	0	0	40	294	0	0	0	97	46	0	106	0	212	0	171														13.33	1767	46	11	1	1744	52	101	1776	4456	241	33	134	1171	1178
	13.42	119	0	0	0	0	0	0	7	17	0	0	0	0	0	0	8	0	219	0	0														13.42	2401	15	4	24	253	0	138	1105	907	50	59	73	55	339
	13.5	150	0	0	0	0	0	0	0	0	0	0	0	0	0	0	0	0	358	0	0														13.5	2371	144	10	75	15	0	1	509	455	60	124	36	43	238
	13.58	4	5	0	4	0	0	0	0	142	0	0	0	0	0	0	0	0	129	0	0														13.58	979	310	67	602	13	2	5	175	2815	80	279	0	320	93
	13.67	0	95	0	28	0	0	0	0	419	0	21	0	22	0	0	0	0	225	0	0														13.67	448	1834	7	1396	0	19	276	0	7315	106	553	8	666	136
	13.75	0	2	0	0	0	0	0	0	368	0	0	0	106	0	0	0	0	131	0	0														13.75	384	543	49	99	145	8	90	54	5665	59	103	15	1433	69
	13.83	0	76	0	0	0	0	0	0	354	0	0	0	63	0	0	0	0	0	0	0														13.83	172	2316	177	121	3	38	0	104	5858	63	52	18	1030	0
	13.92	0	0	0	0	0	0	0	0	8	0	0	0	79	0	0	2	0	0	12	0														13.92	47	477	153	199	6	19	78	50	350	73	27	105	1254	37
	14	0	2	0	0	0	0	0	0	0	0	0	0	10	0	0	2	0	0	0	0														14	34	528	31	3	0	16	320	22	109	418	128	62	463	0
	14.08	0	0	0	0	0	0	0	0	0	49	2	0	0	0	0	135	0	0	0	0														14.08	86	416	1	5	3	133	253	10	102	444	258	29	24	16
	14.17	0	105	0	0	0	0	0	0	0	16	0	0	0	0	0	100	0	0	0	0														14.17	168	1681	105	59	0	3	5	63	109	134	32	23	27	102
	14.25	0	48	8	0	0	0	0	0	0	0	0	0	0	0	0	42	0	0	0	0														14.25	220	1561	467	128	9	15	86	33	183	419	71	255	33	198
	14.33	0	0	13	0	0	0	0	0	0	0	5	9	0	0	0	72	0	0	0	0														14.33	45	924	542	2	1	78	0	63	164	376	309	241	32	189
	14.42	0	0	41	0	0	7	0	0	0	0	0	53	0	0	0	0	0	0	0	0														14.42	62	190	1115	122	0	947	7	7	71	98	596	494	46	34
	14.5	0	60	0	0	0	30	0	0	0	0	12	50	0	0	0	0	2	0	0	0														14.5	76	1071	103	12	3	1804	8	137	1	63	602	413	174	2
	14.58	0	35	0	0	0	0	0	0	0	0	2	78	0	0	0	0	0	0	0	0														14.58	44	901	54	46	1	26	0	13	12	63	85	634	29	9
	14.67	0	0	0	0	0	0	0	0	0	0	0	9	0	0	0	0	0	0	0	0														14.67	45	342	156	115	0	1	219	51	7	86	25	43	74	67
	14.75	0	0	0	0	0	0	0	2	0	0	0	0	0	0	0	0	0	14	0	0														14.75	226	286	114	131	3	0	163	458	41	152	45	57	192	51
	14.83	6	0	0	23	0	0	0	0	0	0	0	0	0	0	0	0	0	0	11	0														14.83	606	343	22	844	0	3	18	152	15	44	165	307	173	166
	14.92	42	0	0	0	0	0	0	0	0	0	0	0	0	251	0	0	0	142	0	0														14.92	1411	393	29	186	0	17	35	100	2	124	128	189	32	5693
	15	32	0	0	32	0	0	0	28	0	0	0	0	0	236	0	0	0	6	0	0														15	1209	389	56	1097	102	12	2	886	10	402	14	168	78	5847
	15.08	0	0	0	33	0	0	0	48	0	0	4	0	0	389	0	0	0	0	2	0														15.08	254	315	22	1662	119	12	0	2243	18	234	411	82	29	7695
	15.17	0	17	0	63	0	0	0	57	0	60	27	0	0	430	0	0	10	0	33	0														15.17	42	768	3	1825	103	117	31	2184	3	308	933	250	49	7260
	15.25	0	96	0	20	0	0	0	0	0	0	0	0	0	522	0	0	10	0	61	0														15.25	45	2099	0	1223	1	78	139	640	57	83	353	224	47	8316
	15.33	0	176	0	0	0	40	0	0	0	0	18	0	0	234	0	0	21	0	0	0														15.33	41	2412	74	191	1	1994	2	300	0	16	716	81	53	3648
	15.42	0	0	0	0	0	10	0	0	0	0	0	0	0	368	0	0	0	0	0	0														15.42	75	212	106	72	6	619	266	81	12	7	41	100	210	6378
	15.5	0	2	0	0	0	0	0	0	0	0	0	0	0	6	0	0	0	0	0	23														15.5	46	286	22	0	43	135	234	20	42	56	114	247	117	690
	15.58	0	0	0	0	0	0	0	0	0	0	0	0	0	220	0	0	0	25	0	30														15.58	61	18	18	14	2	0	37	34	124	54	200	79	48	4407
	15.67	0	0	0	0	0	0	0	0	0	0	0	0	0	191	0	0	0	208	0	11														15.67	116	13	0	26	1	0	3	49	105	214	337	73	60	3667
	15.75	0	0	0	0	0	0	0	0	0	0	0	0	31	2	0	0	0	14	0	0														15.75	236	33	47	113	10	0	42	87	12	50	109	297	788	335
	15.83	0	0	4	0	0	0	0	0	0	0	0	0	46	0	0	0	0	0	0	40														15.83	145	21	401	366	77	17	41	155	10	48	58	278	1142	196
	15.92	0	0	0	0	0	0	0	0	0	0	0	0	66	0	0	0	0	0	0	0														15.92	96	148	39	432	215	59	19	19	10	118	13	306	1290	19
	16	0	6	0	17	0	0	0	0	0	0	0	12	17	0	0	0	0	0	0	0														16	46	570	11	767	108	75	0	5	73	262	71	157	368	2
	16.08	0	0	0	114	0	0	0	0	0	0	0	23	3	0	0	0	0	0	0	0														16.08	53	157	125	2559	10	25	249	61	143	87	38	291	314	64
	16.17	0	13	28	128	0	0	0	0	148	0	0	0	0	0	0	0	0	0	0	0														16.17	161	427	449	3044	3	10	178	5	3734	78	28	38	140	62
	16.25	0	0	51	96	0	0	0	0	179	0	0	0	0	0	0	0	9	0	0	0														16.25	178	179	839	2437	9	19	111	233	3972	76	67	13	72	2
	16.33	0	0	141	27	0	0	0	0	18	0	0	0	0	0	0	10	0	0	0	0														16.33	237	353	1434	1418	7	118	75	120	516	212	156	21	37	62
	16.42	0	0	66	0	0	0	0	11	0	0	0	0	0	0	0	101	4	0	0	0														16.42	208	164	1312	96	71	55	0	519	70	77	16	90	38	258
	16.5	0	0	14	0	0	9	0	51	0	0	0	0	0	0	0	483	0	0	0	0														16.5	70	12	395	4	144	804	0	1744	8	90	39	1	64	141
	16.58	0	0	0	0	0	35	0	0	0	0	0	0	0	209	0	212	0	0	0	0														16.58	52	8	9	16	130	2303	213	507	95	57	241	97	85	4730
	16.67	0	0	0	0	0	0	0	0	0	0	37	0	0	414	0	0	0	0	0	0														16.67	50	9	111	0	232	136	222	51	177	51	1348	88	186	7228
	16.75	0	0	0	0	121	0	0	0	0	0	117	0	3	316	0	0	0	0	11	0														16.75	54	34	42	0	3230	72	88	20	8	319	3001	81	400	5388
	16.83	0	0	0	0	111	0	0	0	0	0	18	13	47	306	0	0	0	0	34	0														16.83	155	126	68	106	3244	5	10	16	80	416	731	416	944	5058
	16.92	0	0	0	0	0	0	0	0	146	23	3	69	66	419	0	0	0	2	2	176														16.92	212	25	93	359	228	0	185	74	3215	379	240	457	1473	7404
	17	0	0	8	0	0	0	0	0	168	301	0	5	43	265	0	0	0	0	0	377														17	518	7	256	307	288	0	95	96	2962	348	0	166	971	4197
	17.08	15	0	0	0	0	0	0	0	0	216	0	0	0	0	0	0	0	57	9	329														17.08	711	23	453	161	250	105	0	5	0	496	2	17	41	155
	17.17	0	0	42	27	0	0	0	0	0	103	0	0	0	0	0	0	0	34	46	23														17.17	315	30	649	1324	137	17	102	119	5	664	186	4	35	3
	17.25	0	0	81	0	0	0	0	0	0	0	0	0	0	0	0	0	38	0	0	0														17.25	98	5	1065	86	21	0	202	217	114	860	27	21	32	104
	17.33	0	0	0	0	0	0	0	0	0	0	0	0	0	0	0	0	64	0	0	0														17.33	84	23	93	4	75	16	31	264	373	613	11	12	28	131
	17.42	0	0	0	0	0	0	0	0	268	0	0	0	0	0	0	0	21	0	0	0														17.42	73	12	241	0	8	14	28	204	4317	160	99	15	30	181
	17.5	0	0	0	0	0	0	0	24	212	0	0	0	0	0	0	0	0	0	0	0														17.5	78	50	26	158	23	2	26	1265	3424	78	73	15	33	54
	17.58	0	0	0	0	0	0	0	53	46	0	0	0	0	0	0	0	24	0	0	0														17.58	89	29	4	217	1	24	1	1654	785	46	9	105	52	5
	17.67	0	0	0	0	0	5	0	0	0	0	0	0	0	0	0	0	10	0	0	0														17.67	183	6	3	58	28	502	15	366	299	87	9	201	57	34
	17.75	0	0	0	0	0	0	0	0	0	0	0	0	0	0	0	0	0	30	0	0														17.75	82	27	3	47	2	8	0	290	198	634	22	23	48	106
	17.83	0	0	0	0	0	0	0	0	0	0	0	0	0	0	0	0	0	0	0	0														17.83	175	14	6	17	6	85	17	135	574	223	19	17	58	19
	17.92	0	0	0	0	0	0	0	0	0	0	0	0	0	0	0	0	0	0	0	0														17.92	101	465	15	0	180	0	44	0	135	58	18	0	39	19
	18	0	0	0	0	0	0	0	0	318	0	0	0	0	0	0	0	0	0	0	0														18	128	298	77	78	264	22	346	17	5656	75	94	6	96	111
	18.08	0	86	0	0	0	0	0	0	155	0	0	0	0	207	2	0	0	0	0	0														18.08	321	2227	134	35	212	0	420	21	3957	110	326	7	256	4386
	18.17	8	6	22	0	0	0	0	0	60	0	0	0	0	373	0	8	0	15	17	0														18.17	1097	553	517	6	138	2	362	98	2759	82	36	7	214	6338
	18.25	22	0	0	0	0	0	0	0	0	0	0	0	28	291	0	25	0	32	142	144														18.25	1655	339	362	7	129	462	321	67	401	510	5	49	849	5649
	18.33	0	0	6	0	119	0	0	0	0	89	0	0	0	144	0	0	0	0	238	375														18.33	342	338	245	84	2658	118	150	1	372	294	50	3	108	2475
	18.42	0	29	0	0	167	10	0	0	0	262	0	0	0	3	0	0	0	0	196	170														18.42	414	677	97	0	3568	1376	99	89	3	559	2	31	114	849
	18.5	0	47	0	0	69	6	0	0	0	366	0	0	0	35	0	0	0	0	20	30														18.5	335	786	169	0	2084	826	164	10	30	217	12	14	17	2741
	18.58	0	90	0	0	56	35	0	0	0	0	0	0	0	3	0	0	0	0	10	0														18.58	403	1610	67	14	1385	2029	317	23	158	1244	0	88	31	732
	18.67	0	0	0	0	0	2	0	0	0	93	0	0	0	0	0	0	0	0	11	0														18.67	98	108	12	11	254	329	291	0	115	281	10	47	45	552
	18.75	0	6	0	0	0	0	0	0	0	8	0	41	0	0	0	0	0	0	6	0														18.75	46	358	5	1	24	328	209	77	6	865	1	453	30	367
	18.83	0	4	0	0	0	0	0	0	0	0	0	11	0	0	0	0	5	0	0	0														18.83	72	467	10	145	1	7	215	23	0	66	8	260	395	347
	18.92	0	0	0	0	0	0	0	0	0	0	0	9	0	0	0	0	0	0	0	0														18.92	41	74	1	71	8	0	159	8	18	132	5	298	44	15
	19	0	0	0	0	0	0	0	0	0	0	0	0	0	0	0	0	0	0	0	0														19	58	23	83	0	14	6	14	29	0	38	127	130	42	2
	19.08	0	0	4	0	0	0	0	0	0	0	0	0	0	0	0	0	0	0	0	0														19.08	52	77	235	3	1	8	1	78	23	8	3	19	118	1
	19.17	0	0	0	0	0	0	0	0	0	0	0	0	0	0	0	0	0	0	0	0														19.17	43	33	3	15	55	0	7	15	10	6	15	0	76	26
	19.25	0	0	0	0	0	0	0	0	0	0	0	0	0	0	0	0	0	0	0	0														19.25	45	27	0	52	103	0	0	135	6	45	19	0	43	31
	19.33	0	0	0	0	0	0	0	0	0	0	0	0	0	0	0	15	0	0	0	0														19.33	43	25	2	4	109	20	0	94	30	32	17	2	36	38
	19.42	0	0	0	0	0	0	0	13	0	0	0	0	0	0	0	261	0	0	0	0														19.42	43	39	1	11	11	0	0	731	93	15	64	1	8	182
	19.5	0	0	0	0	0	0	0	31	0	0	0	0	0	0	0	359	0	0	0	0														19.5	51	45	77	29	186	7	127	1239	18	15	127	3	23	417
	19.58	0	0	0	0	0	0	0	0	0	0	0	0	0	0	0	12	0	0	0	0														19.58	62	37	140	0	233	0	0	151	0	15	224	6	34	200
	19.67	0	0	0	0	0	0	0	0	0	0	0	0	0	0	0	0	0	0	0	0														19.67	87	14	123	53	5	31	43	234	0	14	126	8	27	201
	19.75	0	0	0	0	0	0	0	0	0	0	0	0	0	0	0	0	0	0	0	0														19.75	52	39	16	159	25	0	40	185	8	0	7	42	98	160
	19.83	0	0	0	0	0	0	0	0	0	0	0	0	8	0	0	0	0	0	0	0														19.83	170	27	37	96	3	0	86	97	4	0	24	1	418	89
	19.92	2	0	0	0	0	0	0	0	0	0	0	0	0	0	0	0	0	14	0	0														19.92	524	22	0	58	0	8	27	36	162	103	18	9	112	3
	20	0	0	0	0	0	0	0	0	0	7	0	0	0	0	0	0	0	0	0	0														20	122	47	28	84	54	3	3	15	43	222	6	11	90	24
	20.08	0	0	0	0	0	0	0	0	0	246	0	0	0	0	0	0	0	0	0	0														20.08	69	94	1	147	10	0	6	2	32	350	13	3	26	60
	20.17	0	0	0	0	0	0	0	0	0	167	0	0	0	0	0	0	0	0	0	0														20.17	97	59	0	74	3	6	0	3	17	326	0	1	37	6
	20.25	0	0	0	0	0	0	0	0	0	0	0	0	0	0	0	0	0	0	0	0														20.25	70	38	4	0	1	0	0	6	35	1532	16	2	56	16
	20.33	0	0	0	0	0	0	0	0	0	0	0	0	0	0	0	0	0	0	0	0														20.33	102	58	2	6	152	68	0	9	19	567	16	26	68	23
	20.42	0	0	0	0	0	0	0	0	0	0	0	0	0	0	0	0	0	0	0	0														20.42	182	23	137	13	125	35	0	10	76	48	0	16	54	8
	20.5	0	0	9	0	0	0	0	0	0	0	0	0	0	0	0	0	0	0	0	0														20.5	177	47	214	0	179	2	0	14	169	50	1	39	47	5
	20.58	0	0	0	0	0	0	0	0	0	0	0	0	0	0	0	0	0	0	0	0														20.58	99	66	144	0	275	0	3	1	143	1	4	23	63	7
	20.67	0	0	0	0	11	0	0	0	156	0	0	0	0	0	0	0	0	0	0	0														20.67	78	111	68	74	604	6	3	18	4170	16	23	106	39	78
	20.75	0	0	0	0	104	0	0	0	32	0	0	0	0	0	0	0	0	0	3	0														20.75	93	31	70	67	3158	7	103	15	1233	47	130	130	75	10
	20.83	0	0	0	0	6	0	0	0	0	0	0	0	0	0	0	0	0	0	0	0														20.83	54	63	11	2	438	31	73	11	198	0	149	0	49	18
	20.92	0	0	0	0	0	0	0	0	0	0	0	0	0	0	0	0	0	7	0	0														20.92	40	69	32	5	51	9	195	35	132	11	195	0	40	64
	21	0	0	0	0	0	0	0	0	0	0	0	0	0	0	0	0	0	0	0	0														21	41	57	4	3	0	9	195	28	139	6	344	38	31	28
	21.08	0	0	0	0	0	0	0	0	0	0	0	0	0	0	0	0	0	0	0	0														21.08	58	21	13	0	3	6	190	3	33	62	231	9	36	17
	21.17	0	0	0	0	0	0	0	0	36	0	0	0	0	0	0	0	0	0	0	0														21.17	150	26	0	53	0	3	54	134	1014	38	141	15	116	19
	21.25	0	0	0	0	0	0	0	0	141	0	0	0	0	0	0	0	0	0	0	0														21.25	184	17	0	2	5	47	8	151	2941	21	85	28	200	48
	21.33	0	0	0	0	0	0	0	0	0	0	0	0	0	0	0	0	0	0	0	0														21.33	193	28	36	144	0	67	7	142	405	37	0	11	257	10
	21.42	0	0	0	2	0	3	0	0	0	0	0	0	0	0	0	0	0	0	0	0														21.42	54	26	10	521	12	758	6	232	124	8	2	15	142	39
	21.5	0	0	0	0	0	0	0	0	0	0	0	0	0	0	0	0	0	0	0	0														21.5	88	15	24	153	3	163	74	14	75	345	0	4	153	18
	21.58	0	0	0	0	0	0	0	0	0	0	0	0	0	0	0	0	0	0	0	0														21.58	56	16	26	115	0	262	0	1	2	445	0	0	34	15
	21.67	0	0	0	0	0	10	0	0	0	37	0	0	0	0	0	0	0	0	0	0														21.67	53	21	23	151	23	1025	5	53	0	617	58	2	36	159
	21.75	0	0	0	0	0	0	0	0	0	0	0	0	0	0	0	0	0	0	0	0														21.75	44	46	30	74	1	94	3	178	20	393	29	39	30	137
	21.83	0	0	0	0	0	0	0	0	0	0	0	0	0	4	0	0	0	0	0	0														21.83	50	30	77	0	47	126	0	8	0	500	0	54	27	397
	21.92	0	0	0	0	0	0	0	0	0	0	0	0	0	0	0	0	0	0	0	0														21.92	102	24	158	0	69	196	77	5	0	270	1	96	40	129
	22	0	0	0	0	0	22	0	0	0	0	0	24	0	0	0	0	0	21	0	0														22	48	34	240	0	73	1489	212	35	31	10	37	336	50	75
	22.08	0	0	0	0	0	2	0	0	0	0	0	11	0	0	0	0	0	0	0	0														22.08	49	26	76	8	149	557	159	20	25	11	2	256	51	24
	22.17	0	0	0	0	0	0	0	0	0	0	0	0	0	0	0	0	0	0	0	0														22.17	45	29	7	17	3	132	100	16	28	4	1	99	38	10
	22.25	0	0	0	0	0	11	0	0	0	0	0	0	0	0	0	0	0	0	0	0														22.25	38	21	85	13	23	1006	116	12	1	9	0	134	45	11
	22.33	0	0	2	0	0	0	0	0	0	0	0	0	0	0	0	0	0	0	0	0														22.33	58	45	329	28	20	381	30	7	0	0	7	9	37	21
	22.42	0	0	0	0	0	0	0	0	0	0	0	0	0	0	0	0	0	0	0	0														22.42	47	31	73	0	8	201	2	5	0	35	68	15	42	23
	22.5	0	0	0	0	0	0	0	0	0	0	0	0	0	0	0	0	0	0	0	0														22.5	44	194	29	35	2	293	1	1	1	6	87	5	37	33
	22.58	0	0	0	0	0	0	0	0	0	0	0	0	0	0	0	0	0	0	28	0														22.58	50	197	0	12	0	292	23	3	11	168	171	2	188	0
	22.67	0	0	0	0	0	0	0	0	0	0	0	0	0	0	0	0	0	0	0	0														22.67	209	163	1	12	0	110	9	8	30	3	30	9	155	4
	22.75	0	2	0	0	0	11	0	0	0	0	0	0	13	0	0	0	0	0	0	0														22.75	142	404	9	1	13	965	5	1	223	12	38	7	709	10
	22.83	11	8	0	0	18	5	0	0	3	0	0	0	6	0	0	2	0	9	0	0														22.83	549	591	80	243	1116	712	147	8	853	350	31	20	413	275
	22.92	9	0	11	0	0	12	0	0	7	0	0	0	0	0	0	0	0	0	0	0														22.92	635	234	422	136	153	1023	1	72	2205	105	8	30	394	176
	23	0	0	53	0	0	0	0	0	0	0	0	0	0	0	0	0	0	0	0	0														23	295	271	756	121	211	271	1	76	5261	150	66	24	96	37
	23.08	0	0	0	0	10	0	0	0	0	0	0	0	0	0	0	0	0	0	0	0														23.08	189	82	248	55	482	127	0	29	3387	34	27	8	52	43
	23.17	0	0	0	0	45	0	0	0	0	0	0	0	0	0	0	0	0	0	0	0														23.17	179	36	98	0	1944	74	0	30	282	10	29	2	27	71
	23.25	0	0	0	0	0	0	0	0	0	0	0	0	0	0	0	0	0	0	0	0														23.25	60	33	18	0	475	78	9	157	186	4	0	12	45	39
	23.33	0	0	0	0	0	0	0	9	0	0	0	0	0	0	0	0	5	0	0	0														23.33	43	18	9	19	209	14	44	730	623	13	15	2	28	37
	23.42	0	0	0	0	0	0	0	5	0	0	0	0	0	0	0	0	0	0	0	0														23.42	45	20	6	15	119	1	76	580	374	3	5	4	24	57
	23.5	0	0	0	0	0	0	0	0	0	0	0	0	0	0	0	0	0	0	0	0														23.5	32	31	4	35	81	0	135	116	145	13	0	2	30	95
	23.58	0	0	0	0	0	0	0	0	0	0	0	0	0	0	0	0	0	0	0	0														23.58	55	14	62	20	0	79	190	101	137	21	0	0	18	109
	23.67	0	0	0	0	0	0	0	0	0	0	0	0	0	0	0	0	0	0	0	0														23.67	49	30	115	9	1	0	0	1	427	7	0	96	30	197
	23.75	0	0	0	0	0	0	0	0	0	0	0	0	0	0	0	0	0	0	0	0														23.75	48	17	101	2	0	0	0	0	216	16	0	133	41	195
	23.83	0	0	0	0	0	0	0	0	0	0	0	0	0	0	0	0	0	0	0	0														23.83	49	18	108	1	0	126	0	6	427	111	31	96	11	435
	23.92	0	0	0	0	0	0	0	0	0	0	0	0	0	0	0	0	0	0	0	0														23.92	34	38	11	4	1	0	0	1	702	81	0	29	11	105
	24	0	0	0	0	0	0	0	0	0	0	0	0	0	0	0	0	0	0	0	0														24	152	33	11	3	27	0	0	16	937	28	9	7	22	55
	24.08	0	0	0	0	0	0	0	0	0	0	0	0	0	0	0	0	0	0	0	0														24.08	236	12	16	0	13	0	0	21	448	45	0	11	30	9
	24.17	0	0	0	0	0	0	0	0	0	0	0	0	0	0	0	0	0	0	0	0														24.17	188	82	1	9	0	62	0	16	658	5	0	48	23	1
	24.25	0	0	0	0	0	0	0	0	0	0	0	0	0	0	0	0	0	0	0	0														24.25	114	111	11	0	0	50	0	5	607	75	109	6	200	12
	24.33	0	0	0	0	0	0	0	0	0	0	0	0	0	0	0	0	0	0	0	0														24.33	66	129	35	0	6	51	0	0	396	140	98	3	147	8
	24.42	0	0	0	0	0	0	0	0	0	13	11	0	0	0	0	0	0	0	0	0														24.42	51	62	9	23	12	226	52	132	466	894	679	3	179	0
	24.5	0	0	0	0	0	0	0	0	0	0	0	0	0	0	0	0	0	14	0	0														24.5	47	16	3	70	0	115	167	417	38	678	283	123	463	39
	24.58	0	0	0	0	0	0	0	0	0	0	0	0	0	0	0	0	0	0	0	0														24.58	40	21	34	139	4	155	23	620	85	520	174	27	633	6
	24.67	0	0	0	0	0	0	0	0	0	0	0	0	19	0	0	5	0	0	0	0														24.67	68	42	14	175	137	41	11	417	22	607	129	12	782	5
	24.75	0	0	0	7	0	0	0	0	0	0	0	0	60	0	0	0	0	0	0	0														24.75	114	20	0	641	169	66	1	329	0	2	14	8	1096	6
	24.83	0	0	0	0	0	0	0	0	0	0	0	0	17	0	0	0	0	0	0	0														24.83	60	18	57	183	125	0	6	76	0	19	2	10	603	4
	24.92	0	0	0	0	0	0	0	0	0	0	0	0	0	0	0	0	0	0	0	0														24.92	51	14	92	151	0	0	19	19	64	12	22	0	165	0
	25	0	0	0	0	0	0	0	0	0	0	0	0	0	0	0	0	0	0	0	0														25	41	21	192	32	0	0	59	35	439	20	25	0	182	96
	25.08	0	0	2	0	0	0	0	0	0	0	0	0	0	0	0	0	0	0	0	0														25.08	49	98	168	0	17	0	82	0	417	0	13	9	133	187
	25.17	0	0	0	0	0	0	0	0	0	0	0	0	0	0	0	0	0	0	0	0														25.17	46	37	149	6	16	0	160	3	47	3	5	3	67	132
	25.25	0	0	0	0	0	0	0	0	0	0	0	0	0	0	0	0	0	0	0	0														25.25	47	17	95	2	6	20	248	0	2	39	0	7	29	50
	25.33	0	0	0	0	0	0	0	0	0	0	0	0	0	0	0	0	0	0	0	0														25.33	51	40	15	9	2	53	56	0	11	22	0	5	110	11
	25.42	0	0	0	0	0	0	0	0	0	0	0	0	0	0	0	0	0	0	0	0														25.42	50	29	1	19	4	66	8	1	26	288	1	0	219	0
	25.5	0	0	0	0	0	0	0	0	0	0	0	0	0	0	0	0	0	0	0	0														25.5	57	36	0	4	11	55	0	4	39	423	3	18	189	1
	25.58	0	0	0	0	0	2	0	0	0	0	0	0	0	0	0	0	0	0	0	0														25.58	70	30	36	9	90	258	0	3	146	1305	3	8	118	41
	25.67	0	0	0	0	0	0	0	0	0	0	0	0	0	0	0	0	0	0	0	0														25.67	60	17	31	97	137	157	0	0	278	3343	5	16	139	20
	25.75	0	0	0	0	0	0	0	0	0	0	0	0	0	0	0	0	0	0	0	0														25.75	39	40	0	181	173	0	0	6	72	652	2	7	65	38
	25.83	0	0	0	0	0	0	0	0	0	0	0	0	0	0	0	0	0	0	0	0														25.83	45	33	2	42	130	1	90	5	25	1107	4	22	60	0
	25.92	0	0	0	0	4	0	0	0	0	0	0	0	0	0	0	0	0	0	0	0														25.92	42	43	22	59	363	0	18	11	18	445	18	181	51	3
	26	0	0	0	0	22	0	0	0	0	0	0	5	0	0	0	0	0	0	0	0														26	59	25	0	43	1075	0	4	53	25	12	128	115	196	56
	26.08	0	0	0	0	0	0	0	0	0	0	0	0	0	0	0	0	0	0	0	0														26.08	32	29	30	0	161	0	0	46	99	0	370	138	116	104
	26.17	0	0	0	0	0	0	0	0	0	0	0	0	0	0	0	0	0	0	0	0														26.17	36	38	74	0	84	0	3	18	366	0	47	155	171	93
	26.25	0	0	0	0	0	0	0	0	0	0	0	14	0	0	0	0	0	0	0	0														26.25	46	44	76	0	50	6	0	16	47	11	162	213	211	32
	26.33	0	0	0	0	0	0	0	0	0	0	0	0	0	0	0	0	0	0	0	0														26.33	69	35	34	38	0	101	124	165	89	95	31	278	137	12
	26.42	0	0	0	0	0	0	0	0	0	0	0	0	0	0	0	0	0	0	0	0														26.42	159	22	79	14	1	0	69	292	940	0	101	124	43	2
	26.5	0	0	0	0	0	0	0	0	0	0	0	0	0	0	0	0	0	0	0	0														26.5	107	48	12	7	0	0	229	297	206	4	0	53	67	14
	26.58	7	0	0	0	0	0	0	33	0	0	0	0	0	0	0	0	0	0	0	0														26.58	388	40	30	9	16	73	41	1112	548	0	1	29	39	21
	26.67	6	0	0	0	0	0	0	21	0	0	0	0	0	0	0	0	0	76	0	43														26.67	677	13	10	13	0	0	136	943	542	5	0	2	25	29
	26.75	0	0	0	0	0	0	0	0	74	0	0	0	0	0	0	0	0	252	0	18														26.75	269	22	2	1	139	35	30	183	2264	129	22	0	29	2
	26.83	0	0	0	0	0	0	0	0	25	0	0	0	0	0	0	0	0	259	0	0														26.83	368	40	9	0	103	0	1	138	961	4	0	18	43	119
	26.92	0	0	0	0	0	0	0	0	0	0	0	0	0	0	0	0	0	108	0	0														26.92	392	43	13	29	275	33	0	158	74	144	1	8	80	313
	27	0	0	0	0	0	0	0	0	0	0	0	0	0	108	0	0	0	0	0	0														27	187	19	0	250	49	149	0	4	0	522	9	13	47	3048
	27.08	0	0	0	0	0	0	0	0	0	0	0	0	0	100	0	0	0	0	0	0														27.08	67	32	5	465	92	0	2	9	0	648	31	35	36	2012
	27.17	0	0	0	0	0	0	0	0	0	94	0	0	0	0	0	0	0	0	0	0														27.17	54	127	154	315	0	1	0	0	3	500	0	5	59	486
	27.25	0	4	0	0	0	0	0	0	0	73	0	0	0	0	0	0	0	0	0	0														27.25	49	409	52	132	7	63	6	21	13	699	12	0	42	276
	27.33	0	0	0	0	0	0	0	0	0	0	0	0	0	0	0	0	0	0	0	0														27.33	40	119	9	105	12	62	0	3	12	977	3	3	41	86
	27.42	0	2	0	0	0	0	0	0	0	0	0	0	0	0	0	0	0	0	0	0														27.42	56	207	4	5	4	42	2	14	0	298	2	11	124	149
	27.5	0	0	0	0	0	10	0	0	0	0	0	0	0	0	0	0	0	0	0	0														27.5	44	281	92	105	0	1029	70	2	0	1	6	30	352	0
	27.58	0	0	0	0	0	0	0	0	0	0	0	0	8	0	0	0	0	0	0	0														27.58	44	293	89	168	0	145	0	605	8	32	118	6	273	7
	27.67	0	0	0	0	0	0	0	0	0	0	0	0	0	0	0	0	0	0	0	0														27.67	52	278	116	7	0	179	0	643	11	0	83	1	122	16
	27.75	0	65	0	0	0	0	0	0	0	0	0	0	0	0	0	0	0	0	0	0														27.75	273	1741	4	42	1	30	151	545	145	1	0	45	182	21
	27.83	0	37	0	0	0	0	0	4	0	0	0	0	0	0	0	0	0	0	17	0														27.83	421	1052	2	0	1	75	11	754	29	15	1	20	106	20
	27.92	0	0	0	0	0	0	0	35	0	0	0	0	0	0	0	0	2	0	0	0														27.92	355	121	26	33	0	7	116	892	1	51	2	23	27	61
	28	7	0	0	0	0	0	0	0	0	0	0	2	0	0	0	0	0	0	0	0														28	469	255	90	2	1	1	112	72	96	0	80	212	23	182
	28.08	0	0	0	0	0	0	0	0	0	0	0	13	0	0	0	0	2	0	0	0														28.08	135	25	0	1	95	0	144	54	162	0	351	340	29	69
	28.17	0	0	0	0	0	0	0	0	0	0	0	0	0	0	0	0	0	0	0	0														28.17	154	29	0	69	214	2	19	17	150	31	257	87	34	8
	28.25	0	0	0	0	0	0	0	0	0	0	0	0	0	0	0	0	0	0	0	0														28.25	44	15	10	0	137	44	0	7	514	1	400	57	13	17
	28.33	0	0	0	0	0	0	0	0	0	0	12	0	0	0	0	0	0	2	0	0														28.33	56	26	12	134	167	0	11	43	528	8	603	11	23	56
	28.42	0	0	0	0	0	0	0	0	0	0	0	0	0	0	0	0	0	0	0	0														28.42	44	41	32	166	0	1	0	0	545	0	138	7	29	0
	28.5	0	0	0	0	0	0	0	0	179	0	0	0	0	0	0	0	0	0	0	0														28.5	68	15	111	316	0	0	0	8	4228	0	16	12	29	2
	28.58	0	0	0	0	0	0	0	0	86	0	0	0	0	0	0	0	0	0	0	0														28.58	44	49	271	81	0	0	19	0	1884	468	16	40	97	6
	28.67	0	0	0	0	0	0	0	0	0	0	0	0	0	0	0	0	0	12	0	0														28.67	179	45	9	27	0	0	13	22	49	668	1	12	29	61
	28.75	0	0	0	0	0	0	0	0	0	0	0	0	0	0	0	0	0	0	0	0														28.75	268	12	0	10	0	79	183	4	56	459	9	22	30	1
	28.83	0	0	0	0	0	0	0	0	0	0	0	0	0	0	0	0	0	0	0	0														28.83	172	25	90	8	0	137	149	13	6	82	45	5	48	44
	28.92	0	0	0	0	0	0	0	0	0	0	0	0	0	0	0	0	4	0	0	0														28.92	68	57	81	6	0	95	251	0	5	0	45	3	27	37
	29	0	0	0	0	0	0	0	0	0	0	0	0	0	0	0	0	0	0	0	0														29	40	201	95	4	0	10	18	51	5	34	15	88	15	11
	29.08	0	0	0	0	0	0	0	0	0	0	0	0	0	0	0	0	0	0	0	0														29.08	43	205	11	122	33	4	0	2	5	0	22	54	29	14
	29.17	0	0	0	0	0	0	0	0	0	0	0	0	0	0	0	0	0	0	0	0														29.17	78	318	5	171	110	43	13	0	6	136	90	130	21	21
	29.25	0	0	0	0	0	0	0	0	0	0	0	0	0	0	0	0	0	0	0	0														29.25	38	221	5	75	318	17	10	23	0	12	7	63	24	0
	29.33	0	0	0	0	0	0	0	0	0	0	0	0	0	0	0	0	0	0	0	0														29.33	48	197	6	0	441	248	20	166	36	25	7	0	40	11
	29.42	0	0	0	0	38	0	0	0	0	0	0	0	0	0	0	0	0	0	0	0														29.42	292	18	48	0	1616	269	149	180	27	214	54	23	138	0
	29.5	0	0	0	0	77	0	0	12	0	0	0	0	0	0	0	0	0	0	0	0														29.5	363	23	79	1	2349	435	77	656	2	445	307	17	203	110
	29.58	0	0	0	0	34	0	0	12	0	0	0	0	3	0	0	0	0	0	0	0														29.58	93	36	94	92	1223	83	1	435	3	364	21	0	303	100
	29.67	0	0	0	0	0	0	0	0	0	0	0	0	0	10	0	0	0	0	0	0														29.67	77	20	162	227	43	15	6	102	34	333	6	0	150	554
	29.75	0	0	0	0	0	0	0	0	0	0	0	0	0	0	0	0	0	0	0	0														29.75	51	25	107	9	10	107	1	68	9	696	115	13	57	63
	29.83	0	0	0	0	0	0	0	0	0	0	0	0	0	0	0	0	0	0	0	2														29.83	48	14	75	12	0	153	0	1	36	709	304	108	32	17
	29.92	0	0	0	0	0	0	0	0	0	0	2	0	0	0	0	0	0	0	0	0														29.92	47	24	18	32	0	14	5	1	386	51	245	225	53	8
	30	0	0	0	0	0	0	0	0	106	0	0	0	0	0	0	0	0	0	0	0														30	375	92	14	13	4	16	147	89	2796	12	31	88	27	50
	30.08	29	0	0	0	0	0	0	0	0	0	0	2	0	0	0	0	0	0	2	0														30.08	760	96	152	277	7	10	117	5	75	221	181	202	61	146
	30.17	0	0	6	0	0	0	0	0	0	0	0	0	0	0	0	0	8	2	0	0														30.17	98	222	235	191	15	7	37	30	422	47	368	0	82	122
	30.25	0	12	0	0	0	0	0	0	0	0	0	0	0	0	0	0	0	194	0	0														30.25	70	655	19	336	5	8	6	2	816	84	263	2	130	136
	30.33	0	0	0	0	0	0	0	0	0	0	0	0	23	111	0	0	0	7	0	0														30.33	176	17	27	33	23	97	0	17	572	136	188	47	570	2723
	30.42	0	0	0	0	0	0	0	0	0	0	0	0	0	376	0	0	0	54	0	103														30.42	254	126	79	44	121	89	5	214	453	278	214	86	62	7312
	30.5	0	0	0	0	0	0	0	6	0	0	0	0	0	169	0	182	0	128	13	139														30.5	278	322	12	107	193	206	31	740	308	425	437	62	132	3173
	30.58	0	0	0	0	0	26	0	57	0	195	0	0	0	0	0	352	0	261	33	272														30.58	90	102	75	254	199	1838	116	1658	1214	318	618	180	169	144
	30.67	0	0	0	13	0	0	0	4	0	296	104	0	0	0	0	141	0	251	8	390														30.67	96	140	154	506	246	354	394	262	1269	512	2661	171	141	17
	30.75	0	7	36	26	49	0	0	0	0	50	61	38	0	0	0	0	0	41	0	98														30.75	144	296	330	964	1426	403	131	39	869	993	2014	441	131	38
	30.83	0	113	0	44	106	0	0	0	99	0	78	46	0	0	0	0	0	154	41	0														30.83	73	2246	105	1341	2913	362	258	68	2391	626	2010	398	102	175
	30.92	0	117	19	21	175	0	0	0	318	380	186	4	11	70	0	0	9	9	144	0														30.92	184	2640	362	1140	3556	185	240	900	6131	197	3342	76	242	1649
	31	0	2	98	0	180	0	0	0	162	389	46	2	38	229	0	0	6	0	100	190														31	154	353	1308	121	3233	157	172	205	4633	325	943	56	617	3794
	31.08	76	0	144	0	117	0	0	18	96	276	0	0	0	0	0	345	7	0	63	297														31.08	1897	13	1457	200	2356	38	300	970	2501	617	434	21	36	99
	31.17	75	0	126	0	0	0	0	84	341	0	0	0	0	0	0	345	0	0	0	346														31.17	1599	200	1264	22	3	66	267	2025	5383	254	50	134	114	5
	31.25	142	0	72	0	0	0	0	78	0	0	0	19	0	0	0	120	0	0	151	207														31.25	1891	14	713	68	55	370	529	2354	389	47	285	172	25	3
	31.33	29	0	63	0	0	4	2	40	0	0	0	0	0	0	0	312	0	0	139	5														31.33	602	105	587	58	171	722	553	1704	86	42	39	19	140	347
	31.42	4	0	24	0	100	3	0	38	0	0	0	0	0	0	0	24	0	0	74	202														31.42	658	73	381	70	2362	629	350	2037	5	246	46	24	80	418
	31.5	0	0	3	0	0	0	0	32	0	0	0	0	0	213	0	0	0	94	0	275														31.5	194	12	172	21	105	129	289	1427	13	262	192	14	54	3568
	31.58	0	0	0	0	0	0	0	0	0	239	5	16	6	423	0	0	0	31	0	406														31.58	247	87	151	41	62	247	495	474	470	529	216	129	309	6195
	31.67	13	5	7	0	4	0	0	0	0	358	0	0	75	482	0	0	0	178	0	0														31.67	456	443	207	74	359	153	475	376	280	761	324	0	1096	6356
	31.75	0	2	0	0	203	0	0	17	0	183	0	0	0	69	0	0	0	228	0	0														31.75	65	278	50	65	4218	24	490	696	206	426	22	166	92	1475
	31.83	0	63	8	0	80	0	0	27	219	220	0	5	0	0	0	0	0	149	0	0														31.83	201	962	331	102	1867	16	317	1169	3857	587	111	188	45	105
	31.92	0	213	0	31	0	7	0	94	301	285	17	84	0	0	0	0	7	9	0	190														31.92	78	2998	17	862	44	544	275	2210	5353	503	418	573	94	40
	32	0	75	0	30	0	0	0	22	391	0	0	83	0	0	0	86	0	182	0	422														32	153	2004	148	1072	228	262	399	1177	6747	509	51	641	277	144
	32.08	5	0	0	0	0	0	0	67	304	59	0	31	0	0	0	333	0	0	0	211														32.08	398	395	245	247	171	0	329	1383	5189	250	258	309	314	422
	32.17	0	0	36	0	101	0	0	15	356	428	0	14	0	378	0	345	0	0	0	168														32.17	59	244	405	23	2162	98	652	857	6870	197	159	208	74	5521
	32.25	0	0	151	0	196	2	0	0	483	303	0	0	0	222	0	148	4	77	59	327														32.25	212	259	1655	12	3588	839	180	281	6463	453	121	24	65	3590
	32.33	39	0	165	0	139	0	0	0	61	518	6	0	0	384	0	263	0	45	52	475														32.33	1139	287	1827	142	2701	40	512	297	1090	248	125	13	86	5152
	32.42	13	9	145	16	96	0	0	0	498	494	0	0	17	485	0	206	179	135	85	182														32.42	1024	623	1371	501	1838	224	565	362	6314	158	333	0	578	6321
	32.5	8	145	69	100	0	0	0	0	118	512	53	0	96	108	0	393	110	103	95	76														32.5	470	1835	1094	2977	183	253	444	118	1818	136	1739	1	1799	2173
	32.58	0	3	47	121	0	0	0	0	0	58	80	0	46	0	0	415	12	17	0	2														32.58	189	218	379	3032	138	58	146	25	118	227	1720	0	1111	411
	32.67	0	0	0	0	0	0	0	0	0	0	147	0	99	4	0	191	2	0	24	0														32.67	252	26	142	579	42	39	71	11	389	111	2969	0	1170	219
	32.75	71	0	66	0	0	0	0	0	0	327	54	0	140	0	0	79	0	0	5	0														32.75	1375	29	381	112	30	61	67	4	240	593	1336	0	1630	87
	32.83	14	0	69	0	0	0	0	0	0	419	0	0	0	0	0	0	0	0	0	0														32.83	473	210	624	31	29	222	0	12	0	298	295	195	60	66
	32.92	2	0	0	0	0	6	0	0	0	521	0	4	0	0	0	0	0	0	0	0														32.92	147	293	335	30	162	1379	28	16	13	110	86	152	169	16
	33	0	0	0	0	0	89	0	0	0	457	0	68	0	0	0	0	11	0	0	0														33	51	254	387	86	176	3481	503	20	3	399	11	536	241	444
	33.08	5	72	78	0	0	64	0	0	0	305	0	47	62	0	0	0	147	0	0	0														33.08	378	1289	658	201	25	2693	273	96	161	110	88	417	853	669
	33.17	24	161	0	0	0	78	0	0	0	142	0	4	44	64	0	0	60	0	0	0														33.17	896	2631	113	22	80	2878	463	184	71	465	73	132	688	1893
	33.25	0	4	0	0	0	35	0	0	0	369	0	6	0	216	0	0	0	99	2	77														33.25	133	425	26	151	121	1646	615	9	0	200	96	98	108	3398
	33.33	0	0	0	0	101	7	0	0	0	318	0	0	0	521	0	0	5	223	0	112														33.33	290	201	38	284	2422	502	585	3	34	373	33	0	26	7269
	33.42	0	0	0	49	114	0	0	0	8	385	0	0	0	488	0	0	0	95	0	294														33.42	89	133	18	1491	2684	160	290	1	769	172	96	0	50	6640
	33.5	0	2	0	59	177	9	0	0	392	558	0	0	0	378	0	92	0	188	4	230														33.5	176	227	141	1798	3871	395	73	47	6868	104	114	73	139	4933
	33.58	104	0	0	89	80	0	0	0	365	415	12	0	0	532	0	159	0	64	0	103														33.58	1701	55	130	2632	2019	128	114	98	5554	152	230	166	39	6704
	33.67	46	0	0	0	0	0	0	0	328	48	0	7	0	428	0	279	0	18	71	118														33.67	1211	146	27	278	148	52	170	145	5945	481	62	61	201	5181
	33.75	81	0	0	0	0	0	0	34	128	8	11	0	0	0	0	478	39	0	120	4														33.75	1532	31	59	70	210	0	154	1395	2598	338	439	0	258	1190
	33.83	0	0	0	0	6	0	0	50	0	0	148	0	23	0	0	172	211	0	6	0														33.83	281	28	142	13	775	67	57	1822	734	52	3099	19	450	1007
	33.92	0	0	0	0	0	32	0	15	0	0	181	0	115	412	0	57	128	0	0	136														33.92	122	25	167	205	28	1464	46	1124	569	150	3282	116	1626	5756
	34	0	0	0	0	0	60	0	0	414	0	7	0	165	409	0	0	177	0	0	140														34	272	242	53	133	57	2457	0	195	6792	386	529	113	1991	5249
	34.08	3	0	0	0	0	0	0	19	346	186	39	36	125	526	0	0	171	0	0	0														34.08	206	165	111	27	54	521	2	1250	4994	293	1009	280	1666	6131
	34.17	0	0	0	0	0	6	0	37	430	360	81	74	36	383	0	0	8	14	0	0														34.17	172	45	153	130	6	686	5	1565	6160	334	1668	477	999	4775
	34.25	0	0	0	0	0	11	0	65	177	295	150	41	0	329	0	128	7	0	2	47														34.25	495	29	19	99	0	284	25	2174	3261	125	3129	382	223	4504
	34.33	14	0	0	0	0	44	0	2	2	323	108	43	0	68	0	19	101	0	2	157														34.33	497	109	91	14	134	1698	16	667	411	538	2365	336	222	2073
	34.42	11	0	0	0	12	197	0	0	0	392	137	6	34	0	2	0	49	0	96	362														34.42	1031	24	70	129	463	5522	106	235	166	227	3035	263	655	287
	34.5	0	0	0	0	50	220	0	0	421	355	96	0	90	337	0	37	205	0	82	10														34.5	53	26	78	90	1509	5953	80	65	6528	309	1629	5	1742	5373
	34.58	0	0	0	0	0	128	0	0	58	414	0	0	148	456	0	434	158	0	61	0														34.58	342	270	132	2	196	4984	44	98	1912	324	150	0	1802	6087
	34.67	0	0	0	0	0	101	0	0	0	394	0	0	126	493	0	180	2	0	0	0														34.67	438	125	195	75	82	3569	10	153	81	290	424	102	1350	5992
	34.75	8	48	0	0	0	176	0	0	208	0	7	0	153	307	0	63	0	39	0	0														34.75	622	894	88	117	0	4553	45	614	3691	1050	148	361	1771	3751
	34.83	116	0	6	0	0	71	0	0	337	0	0	11	71	463	0	138	0	14	0	101														34.83	2175	296	136	41	42	2404	48	288	6371	862	171	217	1029	5366
	34.92	141	0	0	42	0	22	0	0	381	182	0	93	4	304	0	147	0	0	0	0														34.92	3244	153	157	1025	37	949	49	229	5661	520	150	519	261	3509
	35	156	18	0	45	0	0	0	0	82	6	0	33	0	512	0	374	0	0	0	0														35	2877	722	66	1823	10	70	129	69	1265	157	56	358	64	6146
	35.08	179	84	0	46	0	0	0	0	0	0	0	9	0	497	0	346	0	65	0	0														35.08	2326	1876	107	1441	4	51	215	0	39	74	101	131	270	5560
	35.17	71	156	0	12	0	0	0	0	0	0	0	0	15	243	0	242	0	99	0	0														35.17	1669	2246	139	533	60	18	76	9	163	388	58	12	499	3484
	35.25	0	283	7	28	0	0	0	0	0	0	0	0	0	0	0	19	0	191	0	0														35.25	175	3408	324	998	169	0	46	54	0	271	145	0	83	247
	35.33	0	32	0	0	9	0	0	0	0	308	2	0	0	0	0	3	0	118	0	0														35.33	279	776	15	433	296	29	98	9	87	351	221	59	136	382
	35.42	0	0	0	0	134	0	0	0	268	351	0	0	0	115	0	0	0	2	0	0														35.42	134	278	226	56	3798	151	233	9	4833	247	317	90	41	2461
	35.5	0	0	0	0	68	25	0	0	212	319	2	0	0	316	0	0	0	138	0	0														35.5	419	231	100	89	1999	1364	579	129	4313	269	338	126	48	5683
	35.58	0	6	148	0	28	26	0	0	81	401	147	0	0	439	0	0	0	157	0	0														35.58	217	486	1577	79	1234	1344	771	138	1555	237	3063	103	204	6059
	35.67	0	0	177	0	0	2	0	0	304	411	47	0	42	497	0	2	0	131	0	0														35.67	175	230	2298	87	271	484	821	76	4959	361	1306	10	683	5897
	35.75	0	9	252	0	0	13	0	0	351	147	29	0	13	413	0	301	0	210	0	0														35.75	154	308	2197	227	73	603	411	28	4632	732	994	262	407	5504
	35.83	0	8	214	3	0	0	0	0	315	52	183	11	112	32	0	222	16	0	14	0														35.83	58	581	2989	770	77	110	184	9	4492	539	2979	340	1437	1473
	35.92	31	0	101	0	0	0	0	0	0	0	176	40	70	0	0	261	32	17	24	0														35.92	894	103	1010	136	3	14	227	218	532	913	3025	394	973	341
	36	0	0	115	0	0	0	0	2	0	13	111	44	74	0	0	296	169	226	4	0														36	145	21	1599	57	3	14	89	557	817	501	1722	319	998	341
	36.08	0	0	112	0	0	0	0	0	0	219	92	34	51	0	0	0	12	21	0	0														36.08	169	30	1603	409	6	7	70	1	714	534	2591	336	756	117
	36.17	7	0	35	27	0	0	0	0	376	333	27	0	0	0	0	0	0	0	0	0														36.17	329	22	774	1047	28	79	9	113	5288	294	559	7	78	116
	36.25	0	0	0	91	0	0	0	0	416	43	0	0	0	261	0	276	132	0	0	0														36.25	171	26	284	2724	146	7	2	87	6193	520	114	0	29	4964
	36.33	0	0	0	106	0	0	0	0	128	191	2	0	0	389	0	46	12	0	0	0														36.33	327	56	361	2769	201	0	1	19	2209	501	265	3	53	5382
	36.42	4	0	0	18	0	0	0	0	0	114	0	0	0	507	0	0	0	0	0	54														36.42	559	300	184	698	49	0	25	111	42	1312	267	61	59	6678
	36.5	65	0	0	12	0	0	0	2	0	329	0	0	0	524	0	0	2	0	0	132														36.5	1482	276	216	611	1	19	213	564	75	307	54	81	112	6458
	36.58	160	4	0	0	0	0	0	27	0	229	0	0	0	179	0	0	0	12	0	63														36.58	2223	633	155	83	8	1	478	1559	84	272	29	12	38	2725
	36.67	105	57	0	0	0	21	0	36	0	0	0	0	0	348	0	0	4	0	0	327														36.67	2461	961	57	381	9	972	493	1851	7	118	94	4	115	3860
	36.75	0	0	0	0	0	39	0	119	0	71	0	0	0	390	0	0	0	0	0	58														36.75	664	276	19	20	0	2096	484	2653	14	413	52	24	168	4938
	36.83	40	306	0	0	13	0	0	62	0	359	18	0	60	130	0	38	0	0	0	79														36.83	1079	3689	36	52	620	321	710	2121	83	342	517	42	1080	1765
	36.92	41	67	0	0	9	29	0	13	34	150	0	0	110	320	0	229	0	0	0	0														36.92	985	1656	28	82	681	1203	555	751	1158	703	197	11	1416	5766
	37	0	4	0	0	0	68	0	25	196	83	8	0	87	304	0	0	0	0	0	0														37	280	613	342	109	343	3135	288	983	3873	969	515	146	1432	3846
	37.08	0	0	0	0	145	120	0	25	252	0	42	104	0	0	0	76	0	0	0	0														37.08	84	225	63	116	3690	4026	138	817	5700	1581	764	530	163	587
	37.17	0	2	0	0	174	134	0	0	169	0	0	4	9	0	0	319	2	0	28	0														37.17	47	165	19	0	3567	3823	192	284	2791	570	14	207	293	287
	37.25	0	0	0	0	80	253	0	0	25	0	0	22	0	429	0	365	0	147	26	0														37.25	43	13	72	1	1803	6338	162	223	650	347	53	159	181	5320
	37.33	0	0	0	0	0	11	0	0	309	0	0	0	0	453	0	84	0	195	30	0														37.33	54	17	7	184	292	1140	157	239	5669	89	48	0	165	6125
	37.42	0	0	0	0	0	0	0	0	2	0	0	0	0	506	0	2	0	2	0	0														37.42	50	24	131	147	47	614	127	303	380	61	128	5	41	4974
	37.5	0	0	0	0	0	0	0	0	0	0	0	0	0	442	0	0	0	0	0	0														37.5	50	9	124	60	238	253	0	437	319	56	1	6	160	4242
	37.58	0	0	0	0	27	0	0	0	164	0	0	0	0	324	0	0	0	0	0	0														37.58	102	10	54	21	967	35	2	195	3125	76	50	50	158	2896
	37.67	0	0	0	0	150	0	0	0	289	0	0	0	28	0	0	0	0	0	0	0														37.67	219	121	31	26	3022	52	12	10	5906	78	72	3	465	428
	37.75	0	0	0	0	230	0	0	0	299	0	13	0	104	0	0	0	20	0	0	0														37.75	396	23	160	122	3957	39	24	45	4706	64	529	258	1275	886
	37.83	0	0	42	0	84	0	0	0	2	0	13	0	15	0	0	32	38	0	0	0														37.83	230	28	762	129	1974	78	211	26	891	68	503	329	690	516
	37.92	0	0	79	0	0	0	0	0	0	0	45	43	30	0	0	0	0	0	0	0														37.92	67	134	1543	0	348	198	435	22	241	97	1241	203	688	20
	38	0	0	58	0	0	0	0	0	0	0	203	24	25	0	0	11	0	0	0	0														38	38	18	731	3	109	221	425	82	131	61	2649	258	691	78
	38.08	0	0	118	0	0	0	0	0	0	0	40	7	0	0	0	0	0	0	0	0														38.08	47	25	1376	126	22	29	80	157	7	52	1126	80	198	113
	38.17	0	0	0	12	0	0	0	0	0	0	121	0	0	0	0	0	0	0	0	0														38.17	109	98	235	475	4	26	60	11	8	135	2398	0	196	188
	38.25	0	6	0	32	0	0	0	0	0	0	0	0	0	20	0	0	0	0	0	119														38.25	107	384	585	1579	0	26	20	15	0	75	736	9	62	884
	38.33	0	0	0	54	0	0	0	0	0	0	83	0	0	0	0	0	0	0	0	0														38.33	136	490	576	1357	6	38	75	24	8	502	1433	99	58	64
	38.42	0	5	0	9	0	0	0	0	0	0	20	0	0	0	0	0	0	0	0	0														38.42	150	425	74	685	85	42	9	81	0	1244	1432	95	37	13
	38.5	0	0	0	36	0	0	0	0	0	5	74	0	0	0	0	0	0	0	0	0														38.5	189	334	13	1515	121	33	34	149	16	353	1528	17	65	72
	38.58	0	84	0	0	0	0	0	0	0	0	0	0	0	0	0	0	0	0	0	0														38.58	342	1362	3	229	0	95	116	18	9	160	84	1	46	68
	38.67	0	3	0	0	0	0	0	0	0	0	0	0	0	0	0	0	0	0	0	0														38.67	515	465	8	28	0	120	284	127	0	145	110	114	248	3
	38.75	0	23	0	0	0	0	0	8	0	0	0	0	31	0	0	0	0	0	0	0														38.75	509	1055	49	9	6	35	0	844	83	11	146	18	527	22
	38.83	0	0	0	0	0	0	0	0	0	0	0	0	0	0	0	0	0	0	0	0														38.83	201	541	226	94	2	33	65	352	7	51	19	0	246	6
	38.92	0	0	0	0	0	0	0	27	0	0	0	0	0	0	0	0	0	0	0	0														38.92	275	239	16	155	157	50	65	752	8	16	110	24	43	7
	39	0	0	0	0	0	0	0	83	0	0	0	0	0	0	0	5	6	0	0	0														39	288	31	26	153	141	257	237	2673	6	14	174	17	52	372
	39.08	0	0	0	0	0	7	0	95	0	0	0	0	0	0	0	0	0	60	0	0														39.08	77	25	2	78	0	674	83	2175	7	3	56	107	36	392
	39.17	0	0	0	0	0	2	0	83	0	0	0	18	0	244	0	0	0	176	0	0														39.17	47	28	30	3	7	338	6	2432	31	62	12	158	64	4351
	39.25	0	0	0	0	0	20	0	249	0	0	0	66	2	386	0	0	0	239	0	0														39.25	61	34	9	37	1	1047	9	3079	21	0	49	373	371	5387
	39.33	0	0	0	0	0	15	0	181	0	0	0	0	0	398	0	0	0	308	0	0														39.33	59	30	75	155	4	900	67	3844	7	0	24	33	26	5216
	39.42	0	0	0	0	0	0	0	90	0	0	0	0	0	345	0	0	0	302	0	0														39.42	72	26	160	112	0	215	100	2228	13	72	135	0	58	3615
	39.5	0	0	0	0	0	0	0	0	0	0	0	0	0	178	0	0	8	6	0	0														39.5	118	37	135	9	32	177	159	598	0	1	7	19	63	2993
	39.58	0	0	0	0	0	0	0	0	0	0	0	0	0	193	0	112	52	0	0	0														39.58	53	103	210	361	212	5	218	735	21	17	65	87	87	2305
	39.67	0	0	94	0	0	0	0	0	0	0	10	0	0	0	0	188	9	0	0	0														39.67	149	19	1172	75	138	0	343	577	160	6	381	81	135	202
	39.75	0	0	140	0	0	0	0	0	63	0	0	0	24	0	0	235	0	0	0	0														39.75	375	20	1218	198	59	0	43	164	1342	50	121	25	588	0
	39.83	0	0	0	22	0	0	0	0	240	0	0	0	0	0	0	227	12	0	0	6														39.83	285	71	194	819	0	153	6	11	4704	9	102	87	168	35
	39.92	0	0	0	80	0	0	0	0	97	0	0	0	0	0	0	0	3	0	0	19														39.92	117	27	59	2333	18	82	176	48	3202	0	116	87	40	0
	40	0	0	0	36	0	0	0	0	0	0	0	0	0	0	0	0	99	0	37	220														40	307	30	5	1219	95	1	237	97	124	76	26	2	43	67
	40.08	0	0	0	39	0	0	0	0	0	64	0	0	0	0	0	0	0	0	21	199														40.08	163	281	0	1517	0	19	23	74	379	168	42	24	65	168
	40.17	0	0	0	35	0	0	0	0	0	24	0	0	0	0	0	0	0	0	0	52														40.17	212	171	119	1797	0	17	91	12	386	522	53	89	69	467
	40.25	0	4	0	0	0	0	0	0	94	0	0	0	0	0	0	0	0	0	0	0														40.25	126	430	95	236	28	6	12	62	2104	355	343	29	145	332
	40.33	0	0	0	0	0	23	0	0	140	0	22	0	0	153	0	0	0	0	0	0														40.33	133	272	99	42	52	887	45	25	2575	188	903	59	192	2448
	40.42	0	0	0	0	0	26	0	0	0	0	163	0	0	269	0	0	0	25	0	0														40.42	65	56	29	64	40	991	180	143	111	121	2657	12	43	4479
	40.5	0	0	0	0	0	0	0	0	0	0	173	0	0	270	0	0	0	87	0	0														40.5	66	27	29	1	130	4	278	34	88	75	3771	122	46	3754
	40.58	0	0	0	0	0	0	0	0	0	0	110	14	0	386	0	0	0	0	0	0														40.58	157	28	56	25	24	19	79	215	0	50	2206	157	329	6946
	40.67	0	0	0	0	0	0	0	19	0	0	36	51	0	301	0	0	0	0	0	0														40.67	123	25	134	167	16	122	118	791	18	54	1356	530	477	4267
	40.75	0	0	0	0	0	0	0	166	0	0	0	29	59	100	0	0	0	6	0	0														40.75	136	121	13	250	119	86	129	2640	0	60	702	216	1168	3017
	40.83	0	0	0	0	0	0	0	79	0	0	4	3	101	2	0	0	0	0	0	0														40.83	347	96	44	140	80	0	3	2108	93	59	561	46	1443	574
	40.92	0	9	0	0	33	0	0	0	0	0	23	0	17	0	0	10	0	123	0	0														40.92	184	529	10	8	1246	3	68	482	327	354	689	12	512	121
	41	0	0	22	0	171	0	0	122	88	11	2	0	0	0	0	36	0	258	0	0														41	162	21	224	93	4121	42	19	2068	1858	470	178	5	122	69
	41.08	0	0	87	0	130	0	0	225	346	4	0	0	0	0	0	0	22	191	0	0														41.08	129	35	1440	140	2760	117	7	3138	6415	505	26	17	45	106
	41.17	0	0	61	71	0	0	0	290	52	0	0	0	0	3	0	0	116	72	38	0														41.17	75	43	969	2220	3	63	71	3196	3082	246	117	38	44	494
	41.25	0	0	0	4	0	0	0	116	178	0	0	0	0	0	0	0	20	0	13	0														41.25	126	49	227	382	137	7	42	2316	2950	65	170	26	44	7
	41.33	0	0	0	0	0	0	0	163	0	0	0	0	0	0	0	0	0	20	3	0														41.33	423	27	79	57	89	1	246	2495	177	55	118	92	65	5
	41.42	0	0	0	0	0	0	0	9	0	0	0	27	0	0	0	0	2	70	68	2														41.42	44	86	35	120	6	18	191	783	36	169	12	260	86	27
	41.5	0	0	0	0	0	0	0	0	0	0	0	0	0	0	0	0	0	0	104	118														41.5	93	81	17	98	9	6	409	189	10	77	78	250	62	136
	41.58	0	0	0	0	0	0	0	0	0	0	0	28	0	0	0	0	0	0	71	86														41.58	123	297	27	15	8	67	326	53	13	212	83	379	114	17
	41.67	0	19	0	0	0	0	0	0	0	0	0	10	0	0	0	0	0	0	147	249														41.67	39	616	0	23	81	0	109	14	144	428	8	263	220	61
	41.75	0	81	0	0	0	16	0	0	0	142	0	0	0	0	0	0	0	0	0	177														41.75	102	1080	100	13	100	837	7	24	146	362	12	112	170	260
	41.83	0	0	0	0	0	0	0	0	0	129	0	0	0	105	0	0	0	0	0	238														41.83	55	159	65	14	2	422	8	13	137	352	132	102	161	2595
	41.92	0	198	0	0	0	0	0	0	185	290	0	0	0	12	0	77	0	0	0	273														41.92	71	2604	9	141	140	354	18	32	4551	141	64	16	35	1160
	42	0	156	0	0	0	0	0	0	308	94	15	0	0	186	0	169	0	87	0	0														42	56	2422	102	99	347	194	56	55	5470	327	786	13	59	4037
	42.08	0	292	0	0	0	119	0	37	221	126	18	0	0	479	0	428	0	360	2	112														42.08	50	3403	154	20	1	3891	5	1303	3496	353	806	14	55	5973
	42.17	0	63	5	0	0	136	0	59	8	219	79	0	0	411	0	262	0	381	2	360														42.17	184	1961	478	6	3	4489	93	2138	734	345	1800	7	41	4789
	42.25	0	92	0	0	0	182	0	97	6	313	3	0	0	296	0	353	0	366	175	337														42.25	258	1796	34	85	6	4677	284	2188	770	224	564	41	43	2964
	42.33	0	0	15	0	0	67	0	0	273	0	0	0	0	71	0	281	0	261	217	355														42.33	215	393	220	16	7	2808	451	720	3865	3153	625	23	127	1985
	42.42	0	0	0	0	0	0	0	43	156	120	12	0	0	0	0	243	0	288	263	310														42.42	122	187	138	91	93	603	366	1523	2164	630	445	1	47	517
	42.5	0	5	0	0	4	0	0	137	0	0	0	0	0	0	0	49	0	88	132	56														42.5	173	413	23	132	287	118	269	1974	763	176	148	3	56	610
	42.58	0	0	0	0	45	0	0	7	5	0	0	0	0	0	0	47	0	290	90	187														42.58	93	210	0	5	1697	52	176	997	647	3	7	13	48	408
	42.67	0	0	0	0	0	0	0	0	0	0	0	0	0	0	0	15	0	116	0	200														42.67	122	104	0	82	360	14	150	451	457	14	21	27	53	146
	42.75	0	0	0	0	0	0	0	0	0	0	0	0	0	0	0	6	0	0	0	0														42.75	98	49	45	109	311	0	97	659	135	31	18	14	72	77
	42.83	0	0	0	0	0	0	0	0	0	2	0	0	0	0	0	0	0	0	0	0														42.83	56	70	41	29	92	18	125	275	845	358	33	37	178	53
	42.92	0	0	0	0	0	0	0	0	0	0	0	0	0	0	0	0	0	5	0	0														42.92	112	35	62	25	63	0	108	122	543	349	2	59	49	23
	43	0	0	0	0	0	0	0	0	0	0	0	24	0	0	0	0	0	0	0	0														43	52	38	2	3	34	0	2	11	76	29	22	274	51	37
	43.08	0	0	0	0	0	0	0	0	0	0	0	3	0	0	0	0	2	0	0	0														43.08	95	149	44	57	1	6	15	0	216	8	20	283	49	0
	43.17	0	0	0	13	0	0	0	0	0	0	0	66	0	0	0	0	0	0	0	0														43.17	76	227	31	702	27	0	22	39	69	6	236	507	37	0
	43.25	0	0	0	2	0	0	0	0	0	0	0	16	0	0	0	0	0	0	0	0														43.25	72	252	15	586	5	0	21	26	112	28	189	113	48	20
	43.33	0	0	0	0	0	0	0	0	0	0	0	0	0	0	0	0	0	0	0	0														43.33	102	73	10	145	3	0	15	68	50	0	95	145	42	12
	43.42	0	0	0	0	0	0	0	0	0	0	0	0	0	0	0	0	0	0	0	0														43.42	146	34	144	140	29	103	13	113	80	0	23	255	31	143
	43.5	0	0	0	0	0	0	0	0	0	0	0	0	0	0	0	0	0	0	0	0														43.5	224	77	115	236	15	113	66	13	79	16	28	326	37	252
	43.58	0	0	0	0	8	0	0	0	0	0	0	0	0	0	0	0	0	0	0	0														43.58	71	49	11	86	399	199	3	23	213	5	70	162	29	97
	43.67	0	0	0	0	19	0	0	0	0	0	0	0	0	0	0	0	0	3	0	0														43.67	230	31	35	14	888	124	2	42	80	39	21	62	32	12
	43.75	0	0	0	0	13	64	0	0	0	0	0	0	0	0	0	0	0	0	0	0														43.75	105	47	14	76	564	2563	2	32	253	136	60	19	152	9
	43.83	0	0	0	0	0	93	0	0	0	0	0	0	0	0	0	0	0	0	0	0														43.83	63	62	10	0	75	3120	106	81	98	19	8	0	46	5
	43.92	0	0	0	0	0	0	0	0	0	0	0	0	0	0	0	0	0	0	0	0														43.92	58	247	1	4	14	166	103	77	111	21	15	8	56	17
	44	0	0	0	0	0	0	0	0	0	0	0	0	0	0	0	0	0	0	0	0														44	66	47	46	23	0	115	6	38	493	19	7	12	8	217
	44.08	0	0	0	0	0	0	0	0	0	0	0	0	0	0	0	0	0	0	0	0														44.08	48	55	0	53	6	104	94	5	861	5	19	8	45	310
	44.17	0	0	0	0	0	0	0	0	0	0	0	0	0	0	0	0	0	8	0	0														44.17	61	48	0	39	0	0	204	13	318	3	5	11	23	315
	44.25	0	0	0	0	0	0	0	0	0	0	0	0	0	0	0	0	0	0	0	0														44.25	67	37	2	4	33	4	12	16	68	6	56	1	40	312
	44.33	0	0	0	0	0	0	0	0	0	0	0	0	0	0	0	0	0	0	0	0														44.33	64	43	33	57	14	1	26	7	86	97	211	22	46	165
	44.42	0	0	0	0	0	0	0	0	0	0	0	0	0	0	0	0	0	0	0	0														44.42	74	34	68	80	39	7	13	44	170	153	78	1	47	8
	44.5	0	0	0	0	0	0	0	0	0	8	0	0	0	0	0	0	0	0	0	0														44.5	55	28	183	76	0	1	2	160	95	575	13	7	46	3
	44.58	0	0	0	0	0	0	0	0	0	214	0	0	0	0	0	0	0	0	0	0														44.58	66	19	24	75	0	2	0	279	291	466	0	7	178	44
	44.67	0	0	0	0	0	0	0	0	0	241	0	0	14	0	0	0	0	0	0	0														44.67	71	26	236	28	5	310	73	429	590	717	109	12	384	18
	44.75	0	0	6	0	0	0	0	33	104	4	0	0	0	0	0	0	0	0	0	0														44.75	110	38	486	22	0	486	113	1092	3149	1321	152	98	220	9
	44.83	0	0	0	0	0	0	0	88	4	0	0	15	33	0	0	5	0	0	0	0														44.83	116	44	415	4	1	3	197	2005	475	406	41	162	769	9
	44.92	0	0	0	0	0	0	0	42	18	0	0	21	7	0	0	0	0	0	0	0														44.92	169	20	203	0	0	2	202	1003	945	269	0	227	281	12
	45	0	0	0	0	0	0	0	0	0	0	0	0	0	0	0	0	0	0	0	0														45	238	24	69	6	0	1	0	582	154	16	11	159	276	6
	45.08	0	0	0	0	0	0	0	0	0	0	0	0	0	0	0	0	0	0	0	0														45.08	186	20	0	1	0	0	1	499	73	68	7	106	111	8
	45.17	0	0	0	0	0	0	0	0	0	0	0	0	0	0	0	0	0	4	0	0														45.17	86	125	13	11	1	0	8	131	103	55	7	92	234	41
	45.25	0	0	0	0	0	0	0	0	0	0	0	0	0	0	0	0	0	40	0	0														45.25	75	141	27	1	0	5	13	2	34	13	1	15	44	71
	45.33	0	0	0	0	0	0	0	0	0	0	0	0	0	0	0	0	0	10	0	0														45.33	62	300	6	1	33	0	41	0	12	32	15	26	42	8
	45.42	0	0	0	0	0	0	0	0	0	0	0	0	0	0	0	0	0	0	0	0														45.42	59	175	53	1	131	4	20	28	0	448	3	83	38	39
	45.5	0	49	0	0	10	0	0	0	0	0	0	0	0	0	0	0	0	0	0	0														45.5	54	1282	1	47	536	0	5	6	6	383	22	0	46	46
	45.58	0	0	0	0	0	0	0	0	0	0	0	0	0	0	0	0	0	0	41	0														45.58	44	204	6	97	103	2	531	16	0	20	12	0	51	24
	45.67	0	0	0	0	0	0	0	0	0	0	0	0	0	0	0	0	0	0	0	0														45.67	45	117	0	6	204	0	28	13	0	241	1	0	34	66
	45.75	0	0	0	0	0	0	0	0	0	0	0	0	0	0	0	0	0	0	0	0														45.75	41	184	122	10	35	5	99	6	0	792	207	74	49	6
	45.83	0	0	0	0	0	0	0	0	0	0	0	0	0	0	0	0	0	0	0	0														45.83	63	58	245	12	2	2	231	45	28	508	258	106	69	12
	45.92	0	0	0	0	0	0	0	0	0	16	0	0	0	0	0	0	0	0	0	0														45.92	46	43	217	2	0	122	198	2	46	201	2	68	69	25
	46	0	0	0	0	0	5	0	0	0	0	0	0	0	0	0	0	26	0	0	0														46	77	45	121	1	1	833	100	11	31	6	14	0	51	49
	46.08	0	0	0	0	0	0	0	0	0	0	0	0	0	0	0	0	0	0	0	0														46.08	49	15	0	2	0	0	29	147	11	17	10	6	36	1
	46.17	0	0	0	0	0	0	0	0	0	0	0	0	0	0	0	0	0	0	0	0														46.17	72	26	2	12	1	6	0	0	23	33	3	19	55	4
	46.25	0	0	0	0	0	0	0	0	0	0	0	0	0	0	0	0	0	0	0	0														46.25	124	21	6	65	0	2	2	25	7	31	2	12	30	9
	46.33	0	0	0	0	0	0	0	0	0	0	0	0	0	0	0	0	0	0	0	0														46.33	67	40	6	30	0	3	13	0	15	10	38	6	32	231
	46.42	0	0	0	0	0	0	0	0	0	0	0	0	0	0	0	0	0	0	0	0														46.42	41	150	12	0	9	1	0	2	109	2	0	23	40	188
	46.5	0	0	0	0	0	0	0	0	0	0	0	0	0	0	0	0	0	0	0	0														46.5	54	183	4	2	96	0	14	29	254	15	7	4	234	245
	46.58	0	0	0	0	0	0	0	0	0	0	0	0	4	0	0	0	0	0	0	0														46.58	74	33	63	69	216	1	6	28	187	8	0	11	339	185
	46.67	0	0	0	0	0	0	0	0	0	0	0	0	0	0	0	0	0	0	0	0														46.67	113	105	0	171	0	34	28	2	176	3	54	3	129	6
	46.75	0	0	0	0	0	0	0	0	0	0	0	0	0	0	0	0	0	0	0	0														46.75	120	194	0	75	2	9	40	7	152	1	22	0	61	43
	46.83	0	0	0	0	0	0	0	0	0	0	0	0	0	0	0	0	0	0	0	0														46.83	51	34	0	1	5	2	0	3	43	4	1	24	30	22
	46.92	0	0	0	0	0	0	0	0	0	0	0	0	0	0	0	0	0	0	0	0														46.92	95	36	1	0	12	0	3	14	0	40	218	15	57	5
	47	0	0	0	0	0	0	0	0	0	0	0	0	0	0	0	0	0	0	0	0														47	187	19	113	2	0	0	7	63	2	14	130	11	16	55
	47.08	0	0	0	0	0	0	0	0	0	0	0	0	0	0	0	0	0	0	0	0														47.08	241	17	76	33	101	13	2	275	38	2	233	1	3	44
	47.17	0	0	0	0	0	0	0	0	0	0	0	0	0	0	0	0	0	0	0	0														47.17	422	11	83	1	207	81	0	107	1	130	0	2	26	6
	47.25	0	0	0	0	19	0	0	0	0	0	0	0	0	0	0	0	0	0	0	0														47.25	386	32	267	3	934	383	0	401	2	229	0	15	10	12
	47.33	0	0	0	0	170	29	0	0	0	0	0	0	0	0	0	0	0	0	0	0														47.33	560	18	53	57	3799	1181	51	1	2	68	26	10	28	19
	47.42	0	0	0	2	202	0	0	0	0	0	0	0	0	0	0	0	0	29	0	0														47.42	241	68	10	203	3490	154	98	5	7	169	0	15	91	9
	47.5	0	0	0	0	35	0	0	0	0	0	0	0	0	0	0	0	0	0	0	0														47.5	135	186	0	160	1149	123	149	4	91	311	4	2	53	40
	47.58	0	0	0	0	0	0	4	0	0	0	0	0	0	0	0	0	0	0	0	0														47.58	191	38	27	267	360	7	423	5	0	519	5	6	59	26
	47.67	0	0	0	0	0	0	2	0	0	0	0	0	0	0	0	0	0	0	0	0														47.67	55	29	0	179	147	3	594	15	0	235	0	17	48	9
	47.75	0	0	0	0	0	0	171	0	0	0	0	0	0	0	0	0	0	0	0	0														47.75	47	102	0	136	128	6	4726	8	0	116	0	153	53	10
	47.83	0	0	0	0	0	0	284	0	0	0	0	0	0	0	0	0	0	0	0	0														47.83	48	103	0	0	29	184	4850	4	14	101	0	120	11	35
	47.92	0	0	0	0	0	0	303	0	0	0	0	13	0	0	0	0	0	0	0	0														47.92	33	178	39	0	1	221	4634	3	6	26	2	186	42	66
	48	0	0	0	0	0	0	329	0	0	0	0	13	0	0	0	0	0	0	0	0														48	52	40	1	11	8	274	4614	7	3	0	3	251	92	165
	48.08	0	0	0	0	0	0	267	0	0	0	0	0	0	0	0	0	0	0	0	0														48.08	97	20	19	14	6	0	4154	18	404	6	99	108	89	249
	48.17	0	0	0	0	0	0	310	0	0	0	0	0	0	0	0	0	0	0	0	0														48.17	70	14	64	10	5	3	4269	4	585	10	108	117	147	214
	48.25	0	0	0	0	0	0	160	0	0	0	0	0	6	0	0	0	0	0	0	0														48.25	43	38	97	16	3	0	2498	16	140	0	52	90	638	82
	48.33	0	0	0	0	0	0	0	0	53	0	0	0	0	0	0	0	0	0	0	0														48.33	55	21	158	14	2	0	205	6	1519	0	215	2	175	124
	48.42	0	0	0	0	0	0	253	0	204	0	0	0	0	0	0	0	0	0	0	0														48.42	48	21	17	10	5	5	4110	5	4339	34	87	6	25	31
	48.5	0	0	0	0	0	0	369	0	2	0	0	0	0	0	0	0	0	0	0	0														48.5	77	23	23	14	17	6	4995	9	326	19	10	0	36	20
	48.58	0	0	0	0	0	0	318	0	0	0	0	0	0	0	0	0	0	0	0	0														48.58	274	36	15	0	1	10	4314	34	67	0	16	3	41	32
	48.67	0	0	0	0	0	0	433	0	0	0	0	0	0	0	0	0	0	0	0	0														48.67	419	23	42	3	60	0	5162	55	135	1	1	5	46	41
	48.75	0	0	0	0	0	0	389	0	0	0	0	0	0	0	0	0	0	0	0	8														48.75	247	30	0	5	154	0	5038	246	5	5	48	14	25	18
	48.83	0	0	0	0	0	0	336	0	0	0	0	0	0	0	0	0	0	0	0	12														48.83	111	32	0	80	217	46	4652	144	0	3	5	2	25	17
	48.92	0	0	0	0	20	0	322	27	0	0	0	0	0	0	0	0	0	0	0	0														48.92	140	41	0	172	983	0	3799	810	43	0	12	1	33	31
	49	0	0	0	0	0	0	371	0	0	0	0	0	0	0	0	0	0	0	0	0														49	92	82	81	431	130	0	5075	472	5	15	11	3	26	9
	49.08	0	0	0	0	0	0	407	0	0	0	0	0	0	0	0	0	0	0	0	0														49.08	50	14	7	519	144	0	5045	729	13	7	4	4	23	17
	49.17	0	0	0	0	0	0	374	0	0	0	0	0	0	0	0	0	0	133	0	0														49.17	87	72	14	76	35	60	4589	89	0	15	8	23	31	19
	49.25	0	0	0	0	0	0	452	0	0	0	0	0	0	0	0	0	0	11	0	0														49.25	56	135	2	167	44	128	4969	68	1	0	10	16	52	14
	49.33	0	0	0	0	0	0	215	0	0	0	0	0	0	0	0	0	0	0	0	0														49.33	70	206	0	165	32	113	2791	28	31	24	9	74	32	12
	49.42	0	0	0	0	0	9	61	0	0	0	0	0	0	0	0	0	0	0	0	0														49.42	42	178	203	121	40	559	1580	10	17	19	95	163	70	134
	49.5	0	0	0	0	0	0	381	0	0	0	0	6	0	0	0	0	0	0	0	0														49.5	62	135	86	41	38	1	5018	0	14	245	0	128	171	185
	49.58	0	10	0	0	0	0	449	0	0	0	0	0	0	0	0	0	0	0	0	0														49.58	40	561	36	29	29	2	5525	6	7	191	0	167	201	185
	49.67	0	0	0	0	0	0	448	0	0	0	0	0	0	0	0	0	0	0	0	0														49.67	47	24	1	2	23	4	5239	0	119	148	13	52	144	41
	49.75	0	0	0	0	0	0	362	0	0	0	0	0	0	0	0	0	0	0	0	0														49.75	183	24	7	39	40	1	4681	19	197	130	11	40	207	109
	49.83	0	0	0	0	0	0	63	0	0	0	0	0	2	0	0	0	0	0	0	0														49.83	172	24	30	9	43	1	1664	11	151	103	6	11	292	55
	49.92	0	0	0	0	0	0	93	0	0	0	0	0	0	0	0	0	0	0	0	0														49.92	146	32	109	0	48	0	1787	0	45	9	158	0	65	59
	50	0	0	0	0	0	0	262	0	0	0	0	0	0	0	0	0	0	0	0	0														50	190	48	102	3	46	3	3605	0	17	1	99	19	36	40
	50.08	0	0	0	0	0	0	199	0	0	0	9	0	0	0	0	0	0	0	0	0														50.08	362	47	197	2	21	0	3012	1	4	3	307	6	71	52
	50.17	0	0	0	0	0	0	337	0	0	0	7	0	0	0	0	0	0	0	0	0														50.17	70	33	129	1	45	108	4412	6	23	11	369	6	67	38
	50.25	0	0	0	0	0	0	93	0	0	0	0	0	0	0	0	0	0	0	0	0														50.25	46	21	0	2	117	216	1806	0	0	0	0	34	50	69
	50.33	0	0	0	0	0	0	0	0	0	0	0	0	0	0	0	0	0	0	0	0														50.33	52	53	1	40	219	415	65	0	0	0	0	13	50	75
	50.42	0	0	0	0	0	0	0	0	0	0	0	0	0	0	0	0	0	0	0	0														50.42	43	95	24	0	198	346	163	2	12	9	15	5	46	51
	50.5	0	0	0	0	0	0	0	0	0	0	0	0	0	0	0	0	0	4	0	0														50.5	68	59	27	7	201	75	158	11	0	13	11	24	45	41
	50.58	0	0	0	0	0	0	0	0	0	0	0	0	0	0	0	0	0	0	0	0														50.58	49	74	60	14	170	50	2	166	129	9	6	12	43	28
	50.67	0	0	0	0	0	0	0	0	0	0	0	0	0	0	0	0	0	0	0	0														50.67	37	26	7	83	35	9	0	133	84	20	3	23	34	130
	50.75	0	0	0	0	0	0	0	0	0	0	0	0	0	0	0	0	0	0	0	0														50.75	70	11	12	161	25	4	1	63	121	35	13	21	33	304
	50.83	0	0	0	0	0	0	0	0	0	0	0	0	0	0	0	0	0	0	0	0														50.83	48	28	4	20	24	2	1	7	97	17	152	18	56	202
	50.92	0	0	0	0	0	0	0	0	0	0	0	0	0	0	0	0	0	0	0	0														50.92	61	35	0	0	40	28	9	24	130	23	205	18	34	112
	51	0	0	0	0	0	0	0	0	0	0	0	0	0	0	0	0	0	0	0	0														51	83	33	35	1	28	12	2	10	211	35	189	4	41	142
	51.08	0	0	0	0	0	0	0	0	0	0	0	0	0	0	0	0	0	0	0	0														51.08	51	30	65	18	39	3	0	6	148	27	13	2	46	127
	51.17	0	0	12	0	0	0	0	0	71	0	0	0	0	0	0	0	0	0	0	0														51.17	194	20	498	0	26	2	0	14	2731	273	1	1	42	2
	51.25	0	0	0	0	0	0	0	0	0	0	0	0	0	0	0	0	0	0	0	0														51.25	185	28	199	0	0	0	5	41	168	55	2	69	132	6
	51.33	0	0	0	0	0	0	0	0	0	0	0	0	0	0	0	0	0	0	0	0														51.33	335	37	36	13	53	76	149	28	73	85	43	97	105	9
	51.42	0	0	0	0	0	0	0	0	0	69	0	12	0	0	0	0	0	0	0	0														51.42	63	24	9	1	158	52	104	13	5	287	86	159	166	26
	51.5	0	0	0	0	0	0	0	0	0	263	0	12	7	0	0	15	0	0	0	0														51.5	49	31	32	23	8	0	40	3	4	624	97	237	577	4
	51.58	0	0	0	0	0	0	0	0	0	129	0	0	0	0	0	5	0	0	0	0														51.58	61	165	5	13	7	0	2	281	29	750	89	36	144	8
	51.67	0	0	0	0	0	0	0	0	0	0	0	0	0	0	0	0	0	0	0	0														51.67	51	159	7	15	0	3	1	343	79	612	22	22	42	3
	51.75	0	0	0	0	0	0	0	82	0	0	0	0	0	0	0	40	0	244	0	8														51.75	49	239	39	84	0	142	2	2012	95	250	35	3	31	26
	51.83	0	0	0	0	0	0	0	127	0	0	0	0	0	0	0	63	0	0	0	6														51.83	87	172	6	260	95	361	0	2096	44	214	33	2	51	5
	51.92	0	31	9	0	0	0	0	47	0	0	0	0	0	0	0	0	0	0	0	0														51.92	68	1050	181	332	137	272	0	925	85	186	5	6	24	108
	52	0	0	0	0	0	30	0	0	0	0	0	0	0	0	0	0	0	0	0	0														52	52	57	96	165	208	1504	0	167	0	87	43	22	33	22
	52.08	0	0	0	0	30	0	0	0	0	0	0	0	0	0	0	0	0	0	0	0														52.08	43	14	106	160	1046	335	0	59	158	82	23	9	152	1
	52.17	0	0	0	0	0	0	0	0	0	0	0	0	0	0	0	0	0	0	0	0														52.17	95	26	0	66	118	108	0	0	44	100	85	6	83	0
	52.25	0	0	0	0	0	0	0	0	0	0	0	0	0	0	0	0	0	0	0	0														52.25	331	30	7	9	133	85	2	0	0	87	0	7	77	188
	52.33	0	0	0	0	0	0	18	0	0	0	0	0	0	0	0	0	0	0	0	0														52.33	187	20	1	60	1	18	780	31	308	425	0	2	34	96
	52.42	0	0	8	4	23	0	0	0	0	0	0	0	0	0	0	0	0	0	0	9														52.42	284	254	461	382	1192	0	130	3	693	76	149	167	216	201
	52.5	0	4	0	0	0	0	63	0	0	0	0	0	0	0	0	0	6	0	0	2														52.5	174	388	265	301	175	56	1773	8	7	105	517	120	166	191
	52.58	0	0	26	0	40	0	271	0	0	0	0	0	0	0	0	0	0	0	2	0														52.58	280	166	346	82	1288	31	3857	10	8	68	569	101	248	77
	52.67	0	0	0	0	11	0	92	0	0	0	0	25	0	0	0	0	0	0	0	0														52.67	126	230	132	62	434	0	1674	10	0	58	288	185	246	129
	52.75	0	0	0	0	0	0	0	0	0	0	0	8	0	0	0	0	0	0	0	0														52.75	81	307	200	5	46	0	111	50	35	91	400	250	197	16
	52.83	0	0	0	0	0	0	0	0	0	0	0	0	0	0	0	0	0	18	0	0														52.83	133	79	77	0	18	84	149	141	36	197	358	62	89	3
	52.92	0	0	0	0	0	0	0	0	0	0	0	0	0	0	0	0	0	0	0	0														52.92	54	50	0	168	20	276	23	107	206	95	247	20	96	84
	53	0	0	0	0	0	0	0	13	0	0	0	0	0	0	0	0	0	0	0	0														53	158	35	53	129	22	375	0	861	118	59	245	6	50	15
	53.08	0	0	0	0	0	3	0	0	0	0	0	0	0	0	0	0	0	0	0	0														53.08	256	140	118	86	13	361	12	733	126	138	168	13	58	18
	53.17	0	0	0	0	0	0	0	0	55	35	0	0	0	0	0	2	0	0	0	0														53.17	121	38	21	24	17	103	170	150	1636	535	104	83	57	81
	53.25	0	0	0	0	0	0	0	126	0	0	0	0	0	0	0	0	0	0	0	0														53.25	407	124	64	1	67	87	97	1897	179	86	320	39	285	54
	53.33	0	2	0	0	0	0	0	0	0	0	0	0	16	0	0	0	0	0	0	0														53.33	273	490	8	69	107	16	60	217	21	123	690	131	720	143
	53.42	0	0	0	0	0	0	0	0	0	0	0	0	0	0	0	0	0	0	0	0														53.42	193	315	16	20	135	0	30	67	96	53	434	84	136	124
	53.5	24	0	0	0	0	18	0	0	0	0	0	0	0	0	0	0	0	0	0	0														53.5	1054	223	174	13	219	621	2	10	34	74	37	78	90	107
	53.58	0	0	0	0	0	0	0	0	233	0	0	0	0	47	0	0	3	0	0	0														53.58	121	286	61	1	24	8	95	5	4778	96	47	5	97	1972
	53.67	0	16	0	0	0	12	0	0	302	0	0	0	0	0	0	0	0	9	0	0														53.67	77	655	42	18	43	439	3	39	4619	84	2	49	120	798
	53.75	0	16	0	0	0	0	0	0	173	0	0	0	0	0	0	0	0	0	0	0														53.75	68	448	25	19	26	353	26	166	2627	64	232	86	160	820
	53.83	0	0	0	0	0	6	0	0	221	0	0	0	0	0	0	0	0	0	0	129														53.83	96	186	73	284	27	552	166	6	3496	80	529	63	190	192
	53.92	0	0	0	0	0	0	21	0	0	0	0	0	0	0	0	0	4	36	0	311														53.92	88	62	175	36	33	179	815	10	93	151	839	65	148	108
	54	0	0	0	0	0	0	351	0	0	0	0	0	0	0	0	0	0	20	0	194	t.test													54	113	55	74	16	93	241	4499	18	38	251	537	11	210	66
	avg light	0.274238	2.72576	0.573407	0.0831025	4.28255	2.58449	26.6842	3.23546	9.36288	9.23269	0.470914	1.1662	0.711911	7.1662	0.00554017	6.96122	0.168975	10.7258	4.50139	9.45706	0.543497													avg light	127.604	138.651	66.4515	70.446	179.914	182.377	434.382	159.92	348.069	181.208	85.313	54.2355	104.748	203.812
	avg dark	15.059	20.8299	19.1354	12.8819	22.6146	12.375	0.00694444	13.809	75.1875	98.8194	23.6076	11.6042	20.1736	115.326	4.74653	69.1493	13.1076	43.4688	13.2014	65.2118	0.561319													avg dark	488.691	504.997	327.747	457.396	592.677	586.556	167.868	512.212	1604.31	279.83	619.58	152.024	418.219	1943.82
wt_1	avg 24-hr	6.83513	10.7596	8.81048	5.76271	12.4176	6.92912	14.8459	7.92758	38.5732	48.9877	10.7381	5.79815	9.34823	55.1633	2.1094	34.5578	5.91063	25.2558	8.3621	34.1988	0.688623												wt_1	avg 24-hr	287.84	301.22	182.404	242.159	363.082	361.735	316.114	316.253	905.538	224.972	322.399	97.6302	243.854	975.955
[Rot]																																		[Rot]
WT	AVG	SEM		mKO	AVG	SEM																												WT	AVG	SEM		mKO	AVG	SEM
avg light	5.90388	0.608116		avg light	4.13352	0.526723																												avg light	188.902	9.38754		avg light	131.049	7.02229
avg dark	29.0719	1.43633		avg dark	37.9597	1.65756																												avg dark	552.228	19.4474		avg dark	669.833	22.8577
avg 24-hr	16.1849	0.735531		avg 24-hr	19.1442	0.818718																												avg 24-hr	350.132	10.3318		avg 24-hr	370.139	11.3651
averages of each mouse																																		averages of each mouse
WT	AVG	SEM		mKO	AVG	SEM																												WT	AVG	SEM		mKO	AVG	SEM
Mean Light	5.90388	2.53799		avg light	4.13352	1.31576																												Mean Light	188.902	36.8067		avg light	131.049	27.3542
Mean Dark	29.0719	10.0082		avg dark	37.9597	11.1963																												Mean Dark	552.228	124.672		avg dark	669.833	178.271
Mean Total	16.1849	4.7457		avg 24-hr	19.1442	5.50278																												Mean Total	350.132	64.3611		avg 24-hr	370.139	90.46
[truncated: 7 more columns]

## Sheet: Fig.7H
RER at 30C
		WT										mKO
	genotype	wt_1	wt_2	wt_3	wt_4	wt_5	wt_6	wt_7	wt_8	wt_9	wt_10	ko_1	ko_2	ko_3	ko_4	ko_5	ko_6	ko_7	ko_8	ko_9	ko_10
	Time (hr)	RER	RER	RER	RER	RER	RER	RER	RER	RER	RER	RER	RER	RER	RER	RER	RER	RER	RER	RER	RER
	0	0.945	0.851	0.985	0.915	0.911	0.808	0.889	0.935	0.879	0.886	0.889	0.905	0.884	0.949	0.864	0.892	0.873	0.87	0.914	0.885
	0.08	0.961	0.863	0.965	0.922	0.91	0.814	0.893	0.928	0.889	0.864	0.943	0.914	0.896	0.951	0.881	0.893	0.872	0.862	0.914	0.884
	0.17	0.952	0.854	0.961	0.948	0.906	0.814	0.88	0.932	0.886	0.877	0.925	0.942	0.926	0.942	0.839	0.858	0.89	0.893	0.908	0.86
	0.25	0.969	0.851	0.958	0.945	0.898	0.818	0.862	0.936	0.878	0.9	0.912	0.924	0.922	0.912	0.85	0.868	0.912	0.891	0.91	0.858
	0.33	0.982	0.865	0.96	0.95	0.91	0.84	0.889	0.919	0.891	0.898	0.917	0.926	0.924	0.93	0.873	0.896	0.924	0.927	0.905	0.829
	0.42	0.974	0.901	0.983	0.941	0.91	0.863	0.87	0.935	0.897	0.875	0.917	0.933	0.928	0.958	0.88	0.886	0.919	0.898	0.908	0.843
	0.5	0.936	0.9	1.012	0.958	0.913	0.865	0.868	0.931	0.901	0.878	0.903	0.946	0.923	0.938	0.922	0.834	0.922	0.899	0.904	0.834
	0.58	0.936	0.882	0.975	0.938	0.88	0.875	0.902	0.943	0.903	0.881	0.896	0.944	0.921	0.936	0.877	0.926	0.943	0.9	0.9	0.885
	0.67	0.92	0.849	1.005	0.946	0.897	0.872	0.885	0.932	0.883	0.883	0.904	0.929	0.922	0.96	0.869	0.89	0.956	0.873	0.91	0.881
	0.75	0.918	0.84	0.978	0.956	0.907	0.863	0.869	0.93	0.876	0.894	0.914	0.908	0.913	0.941	0.864	0.963	0.933	0.865	0.891	0.882
	0.83	0.948	0.839	0.971	0.952	0.9	0.865	0.863	0.948	0.877	0.905	0.904	0.995	0.894	0.912	0.873	0.975	0.909	0.877	0.895	0.882
	0.92	0.981	0.854	0.976	0.956	0.9	0.848	0.865	0.96	0.902	0.908	0.906	0.954	0.899	0.935	0.889	0.943	0.899	0.869	0.903	0.883
	1	0.971	0.855	0.986	0.955	0.945	0.861	0.87	0.986	0.898	0.907	0.918	0.939	0.946	0.915	0.928	0.917	0.913	0.902	0.902	0.858
	1.08	0.968	0.882	0.981	0.961	0.921	0.835	0.864	0.976	0.92	0.921	0.929	0.942	0.956	0.907	0.922	0.92	0.902	0.869	0.888	0.854
	1.17	0.945	0.884	0.984	0.948	0.92	0.801	0.866	0.945	0.9	0.956	0.934	0.951	0.959	0.921	0.898	0.908	0.889	0.876	0.897	0.861
	1.25	0.929	0.88	0.983	0.94	0.923	0.859	0.876	0.955	0.878	0.9	0.922	0.954	0.962	0.948	0.873	0.906	0.906	0.883	0.888	0.874
	1.33	0.931	0.863	0.98	0.938	0.926	0.839	0.869	0.928	0.894	0.905	0.925	0.94	0.925	0.938	0.868	0.922	0.971	0.874	0.894	0.885
	1.42	0.951	0.852	0.992	0.965	0.926	0.873	0.893	0.937	0.932	0.893	0.946	0.931	0.929	0.945	0.89	0.924	1	0.882	0.89	0.882
	1.5	0.97	0.862	0.992	0.951	0.915	0.831	0.893	0.946	0.927	0.883	0.98	0.944	0.939	0.979	0.883	0.933	0.976	0.866	0.927	0.925
	1.58	0.982	0.866	0.991	0.954	0.892	0.84	0.888	0.91	0.929	0.887	0.951	0.943	0.939	0.98	0.86	0.902	0.966	0.877	0.921	0.927
	1.67	0.97	0.85	1.01	0.968	0.922	0.828	0.871	0.881	0.901	0.893	0.904	0.971	0.935	0.969	0.862	0.936	0.962	0.862	0.912	0.929
	1.75	0.994	0.879	0.986	0.963	0.949	0.854	0.89	0.934	0.879	0.884	0.9	0.97	0.959	0.977	0.867	0.958	0.948	0.868	0.906	0.931
	1.83	0.997	0.875	0.98	0.936	0.936	0.837	0.884	0.919	0.883	0.885	0.888	0.972	0.981	0.949	0.876	0.912	0.931	0.879	0.895	0.923
	1.92	0.983	0.883	0.98	0.929	0.926	0.824	0.86	0.941	0.875	0.894	0.878	0.973	0.976	0.93	0.865	0.902	0.924	0.889	0.903	0.925
	2	0.972	0.904	0.993	0.928	0.933	0.848	0.869	0.939	0.858	0.891	0.9	0.962	0.982	0.933	0.889	0.93	0.917	0.886	0.908	0.929
	2.08	0.979	0.908	0.975	0.961	0.942	0.854	0.863	0.988	0.846	0.867	0.916	0.961	0.985	0.938	0.918	0.951	0.91	0.869	0.925	0.927
	2.17	1.014	0.887	0.958	0.984	0.93	0.85	0.859	0.936	0.85	0.886	0.923	0.945	0.97	0.931	0.941	0.907	0.924	0.871	0.9	0.925
	2.25	0.977	0.873	0.963	0.987	0.91	0.875	0.885	0.9	0.866	0.911	0.888	0.96	0.967	0.929	0.912	0.916	0.918	0.866	0.893	0.918
	2.33	0.945	0.857	0.969	0.996	0.927	0.847	0.889	0.904	0.877	0.919	0.905	0.946	0.951	0.922	0.906	0.918	0.921	0.871	0.903	0.919
	2.42	0.936	0.864	0.985	1.008	0.929	0.854	0.9	0.905	0.874	0.936	0.898	0.958	0.958	0.924	0.897	0.954	0.918	0.926	0.908	0.922
	2.5	0.94	0.873	0.987	0.993	0.942	0.841	0.893	0.91	0.871	0.927	0.93	0.96	0.957	0.93	0.878	0.981	0.905	0.895	0.926	0.924
	2.58	0.951	0.856	0.984	0.963	0.916	0.837	0.904	0.912	0.883	0.904	0.925	0.953	0.956	0.949	0.904	0.973	0.914	0.894	0.92	0.958
	2.67	0.958	0.856	0.996	0.975	0.955	0.834	0.898	0.88	0.861	0.905	0.939	0.969	0.952	0.95	0.907	0.967	0.914	0.895	0.932	0.994
	2.75	0.975	0.865	0.983	0.97	0.974	0.833	0.879	0.904	0.875	0.886	0.932	0.98	0.978	0.942	0.906	0.962	0.903	0.889	0.93	0.982
	2.83	1.035	0.856	0.977	1.005	0.967	0.856	0.878	0.912	0.866	0.906	0.941	0.976	0.964	0.932	0.917	0.954	0.914	0.873	0.931	0.977
	2.92	0.997	0.876	0.974	1.002	0.946	0.862	0.871	0.893	0.853	0.915	0.917	0.986	0.992	0.961	0.918	0.932	0.916	0.866	0.935	0.962
	3	0.974	0.857	0.974	0.997	0.942	0.865	0.868	0.907	0.827	0.906	0.931	0.986	0.977	0.972	0.92	0.907	0.979	0.879	0.948	0.934
	3.08	0.969	0.869	1.007	0.994	0.938	0.831	0.851	0.942	0.83	0.933	0.9	0.977	0.976	0.96	0.907	0.956	0.988	0.877	0.947	0.928
	3.17	1.01	0.877	1.015	1.001	0.937	0.836	0.84	0.934	0.878	0.933	0.912	0.96	0.987	0.962	0.93	0.937	0.968	0.876	0.923	0.921
	3.25	0.992	0.885	0.993	1.012	0.94	0.851	0.852	0.93	0.878	0.929	0.909	0.932	0.995	0.933	0.928	0.928	0.959	0.886	0.923	0.92
	3.33	0.988	0.89	0.973	1.013	0.955	0.838	0.912	0.924	0.87	0.927	0.917	0.944	0.972	0.906	0.918	0.952	0.937	0.882	0.933	0.923
	3.42	0.988	0.87	0.979	1.004	0.952	0.832	0.914	0.934	0.867	0.988	0.923	0.965	0.985	0.911	0.921	0.941	0.929	0.882	0.934	0.922
	3.5	1.003	0.865	0.978	1.002	0.934	0.816	0.928	0.919	0.873	0.97	0.937	0.978	0.963	0.926	0.92	0.956	0.922	0.86	0.942	0.952
	3.58	1.016	0.891	0.975	0.996	0.948	0.815	0.876	0.914	0.88	0.927	0.934	0.984	0.965	0.908	0.916	0.943	0.957	0.871	0.95	0.932
	3.67	1.007	0.883	0.951	0.99	0.943	0.819	0.876	0.898	0.853	0.928	0.968	0.975	0.957	0.918	0.926	0.927	0.924	0.877	0.968	0.931
	3.75	0.994	0.878	1.008	1.003	0.968	0.816	0.895	0.925	0.865	0.946	0.969	0.976	0.996	0.932	0.928	0.961	0.905	0.88	0.97	0.928
	3.83	0.971	0.869	0.98	1	0.948	0.84	0.9	0.93	0.856	0.927	0.947	0.975	0.959	0.907	0.919	0.994	0.897	0.893	0.947	0.95
	3.92	0.967	0.886	0.973	1.014	0.954	0.837	0.908	0.962	0.845	0.913	0.946	0.927	0.958	0.922	0.918	0.974	0.931	0.889	0.942	0.954
	4	0.963	0.891	0.978	1.027	0.937	0.838	0.924	0.939	0.884	0.916	0.939	0.981	0.969	0.941	0.91	0.949	0.944	0.891	0.967	0.953
	4.08	0.959	0.908	0.968	1.003	0.967	0.817	0.935	0.912	0.873	0.934	0.98	0.955	0.986	0.937	0.912	0.965	0.962	0.882	0.942	0.972
	4.17	0.973	0.899	0.965	1.001	0.963	0.829	0.946	0.929	0.86	0.944	0.985	0.978	0.977	0.944	0.91	0.959	0.951	0.865	0.94	0.967
	4.25	0.992	0.906	0.958	1.006	0.988	0.816	0.957	0.912	0.861	0.95	0.942	0.967	0.986	0.951	0.91	0.973	0.953	0.87	0.941	0.92
	4.33	0.999	0.902	0.951	0.988	0.947	0.825	0.948	0.9	0.868	0.952	0.958	0.968	0.994	0.975	0.911	0.949	0.952	0.936	0.923	0.953
	4.42	0.998	0.911	0.952	1.006	0.956	0.811	0.958	0.904	0.849	0.957	0.985	0.959	0.963	0.976	0.908	0.935	0.91	0.909	0.917	0.947
	4.5	0.969	0.909	0.953	0.994	0.946	0.837	0.96	0.927	0.848	0.945	0.997	0.948	0.987	0.953	0.913	0.96	0.91	0.892	0.923	0.955
	4.58	0.954	0.926	0.967	1.003	0.929	0.802	0.959	0.939	0.847	0.953	0.986	0.95	0.982	0.968	0.917	0.95	0.955	0.894	0.922	0.948
	4.67	0.941	0.926	0.977	1.014	0.937	0.807	0.955	0.916	0.875	0.962	0.985	0.959	0.988	0.948	0.913	0.937	0.963	0.892	0.959	0.985
	4.75	0.968	0.928	0.976	1.02	0.931	0.815	0.931	0.93	0.862	1.027	0.979	0.954	1.002	0.938	0.907	0.955	0.984	0.9	0.947	0.976
	4.83	0.989	0.933	0.968	0.997	0.918	0.816	0.933	0.941	0.83	0.986	0.967	0.97	0.978	0.95	0.915	0.917	0.989	0.885	0.933	0.994
	4.92	0.949	0.928	0.993	1.002	0.926	0.84	0.927	0.969	0.837	0.964	0.953	0.965	0.95	0.951	0.952	0.933	0.932	0.885	0.932	0.962
	5	0.932	0.925	1.008	1.005	0.922	0.823	0.907	0.958	0.863	0.96	0.972	0.969	0.997	0.966	0.929	0.957	0.943	0.889	0.93	0.952
	5.08	0.914	0.909	0.962	0.998	0.916	0.824	0.91	0.936	0.841	0.951	0.975	0.959	1.006	0.963	0.946	0.931	0.925	0.884	0.925	0.944
	5.17	0.929	0.914	0.979	1.005	0.912	0.84	0.906	0.93	0.834	0.964	0.961	0.974	0.964	0.945	0.892	0.949	0.929	0.877	0.935	0.94
	5.25	0.941	0.918	0.995	0.985	0.919	0.824	0.91	0.926	0.894	0.967	0.962	0.953	0.969	0.939	0.925	0.965	0.918	0.879	0.938	0.922
	5.33	0.938	0.953	0.987	0.996	0.922	0.837	0.918	0.932	0.903	0.969	0.962	0.95	0.957	0.926	0.909	0.974	0.938	0.871	0.938	0.908
	5.42	0.96	0.96	0.972	0.986	0.927	0.85	0.917	0.905	0.9	0.979	0.937	0.938	0.961	0.93	0.923	0.97	0.948	0.878	0.951	0.901
	5.5	0.96	0.944	0.975	0.979	0.933	0.808	0.91	0.919	0.864	0.958	0.932	0.96	0.96	0.989	0.91	0.931	0.937	0.894	0.935	0.886
	5.58	0.962	0.912	0.985	0.991	0.927	0.793	0.915	0.936	0.85	0.97	0.913	0.961	0.971	0.969	0.922	0.904	0.918	0.897	0.942	0.883
	5.67	0.954	0.883	0.964	0.999	0.915	0.794	0.913	0.93	0.853	0.97	0.938	0.93	0.938	0.968	0.918	0.951	0.905	0.884	0.918	0.903
	5.75	0.972	0.884	0.984	1.005	0.921	0.804	0.921	0.934	0.845	0.977	0.941	0.926	0.982	0.966	0.917	0.956	0.915	0.87	0.925	0.937
	5.83	0.957	0.88	0.989	1.011	0.902	0.81	0.927	0.942	0.851	0.941	0.925	0.959	0.968	0.96	0.919	0.952	0.941	0.87	0.926	0.943
	5.92	0.992	0.89	0.976	1.006	0.902	0.814	0.915	0.943	0.885	0.943	0.906	0.956	0.961	0.952	0.925	0.939	0.952	0.884	0.92	0.933
	6	0.99	0.901	0.971	1.024	0.957	0.8	0.91	0.954	0.885	0.945	0.935	0.95	0.94	0.97	0.955	0.925	0.917	0.892	0.936	0.932
	6.08	0.972	0.909	0.957	1.021	0.951	0.774	0.902	0.948	0.885	0.936	0.956	0.94	0.921	0.962	0.957	0.953	0.903	0.894	0.917	0.937
	6.17	0.956	0.909	0.96	1.021	0.951	0.82	0.912	0.947	0.869	0.944	0.962	0.951	0.936	0.969	0.943	0.931	0.909	0.915	0.926	0.911
	6.25	0.952	0.887	0.962	0.995	0.923	0.807	0.917	0.957	0.907	0.948	0.951	0.981	0.965	0.963	0.921	0.93	0.894	0.922	0.933	0.902
	6.33	0.953	0.859	0.974	0.993	0.904	0.813	0.935	0.967	0.935	0.942	0.919	0.967	0.963	0.987	0.957	0.939	0.919	0.951	0.954	0.895
	6.42	0.928	0.867	0.955	1.005	0.902	0.797	0.955	0.953	0.908	0.986	0.939	0.955	0.962	0.973	0.953	0.978	0.937	0.938	0.99	0.917
	6.5	0.961	0.906	0.986	0.995	0.903	0.817	0.962	0.962	0.9	0.991	0.961	0.961	0.93	0.935	0.913	0.952	0.893	0.948	0.951	0.905
	6.58	0.938	0.894	0.984	1.003	0.919	0.776	0.964	0.953	0.885	0.981	0.939	0.953	0.93	0.983	0.938	0.952	0.889	0.949	0.942	0.934
	6.67	0.941	0.918	0.989	1.003	0.91	0.792	0.95	0.915	0.869	0.973	0.939	0.971	0.926	0.982	0.938	0.95	0.884	0.917	0.938	0.93
	6.75	0.955	0.903	0.972	1.008	0.913	0.803	0.919	0.955	0.885	0.974	0.911	0.967	0.922	0.97	0.952	0.932	0.899	0.93	0.957	0.934
	6.83	0.961	0.908	0.99	0.999	0.912	0.83	0.917	0.957	0.884	0.965	0.965	0.969	0.922	0.952	0.985	0.969	0.895	0.933	0.962	0.93
	6.92	0.949	0.918	0.971	1.007	0.915	0.861	0.934	0.946	0.881	0.954	0.946	0.955	0.925	0.959	0.959	0.975	0.907	0.945	0.954	0.92
	7	0.931	0.911	0.961	0.999	0.898	0.847	0.936	0.935	0.897	0.953	0.947	0.963	0.934	0.963	0.961	0.968	0.907	0.941	0.927	0.919
	7.08	0.987	0.912	0.975	1.008	0.918	0.851	0.946	0.93	0.896	0.937	0.967	0.95	0.937	0.951	0.967	0.936	0.893	0.945	0.929	0.924
	7.17	0.976	0.909	0.98	1.024	0.925	0.821	0.923	0.944	0.891	0.951	0.959	0.952	0.927	0.937	0.928	0.951	0.9	0.943	0.925	0.92
	7.25	0.969	0.928	0.976	0.995	0.919	0.853	0.923	0.911	0.875	0.947	0.937	0.954	0.945	0.947	0.942	0.922	0.887	0.956	0.938	0.923
	7.33	0.955	0.917	0.989	0.988	0.928	0.865	0.955	0.912	0.88	0.949	0.95	0.963	0.948	0.956	0.93	0.968	0.907	0.942	0.946	0.922
	7.42	0.969	0.906	0.972	1.004	0.927	0.858	0.929	0.934	0.896	0.933	0.944	0.967	0.929	0.951	0.931	0.959	0.9	0.92	0.937	0.923
	7.5	0.969	0.91	0.972	0.992	0.921	0.87	0.932	0.968	0.878	0.945	0.955	0.951	0.949	0.937	0.945	0.956	0.915	0.913	0.945	0.927
	7.58	0.967	0.904	0.965	0.981	0.914	0.886	0.949	0.95	0.884	0.922	0.949	0.942	0.955	0.937	0.936	0.944	0.895	0.919	0.943	0.913
	7.67	0.955	0.888	0.973	0.993	0.936	0.904	0.949	0.954	0.889	0.924	0.966	0.952	0.939	0.949	0.937	0.952	0.89	0.939	0.952	0.932
	7.75	0.971	0.926	0.975	0.997	0.946	0.88	0.958	0.967	0.901	0.94	0.955	0.958	0.962	0.951	0.933	0.936	0.892	0.928	0.959	0.936
	7.83	0.978	0.923	0.96	0.99	0.937	0.833	0.954	0.963	0.899	0.957	0.956	0.959	0.938	0.958	0.928	0.971	0.912	0.922	0.955	0.93
	7.92	0.985	0.928	0.966	0.978	0.944	0.867	0.965	0.953	0.898	0.92	0.947	0.961	0.938	0.957	0.96	0.96	0.926	0.926	0.95	0.923
	8	0.968	0.934	0.979	0.979	0.947	0.892	0.958	0.933	0.898	0.924	0.947	0.952	0.955	0.953	0.981	0.97	0.944	0.941	0.932	0.918
	8.08	0.972	0.93	0.966	0.982	0.946	0.858	0.96	0.93	0.88	0.942	0.965	0.946	0.962	0.952	0.976	0.962	0.931	0.917	0.941	0.925
	8.17	0.972	0.923	0.973	0.98	0.947	0.875	0.944	0.922	0.903	0.947	0.959	0.951	0.965	0.943	0.961	0.949	0.939	0.916	0.945	0.929
	8.25	0.977	0.944	0.983	0.971	0.937	0.894	0.941	0.911	0.887	0.961	0.954	0.959	0.96	0.95	0.959	0.949	0.905	0.917	0.942	0.936
	8.33	0.986	0.941	0.978	0.98	0.95	0.894	0.945	0.906	0.862	0.959	0.966	0.971	0.965	0.941	0.948	0.937	0.891	0.929	0.926	0.938
	8.42	0.978	0.942	0.982	0.988	0.952	0.886	0.947	0.941	0.898	0.959	0.971	0.957	0.972	0.943	0.941	0.958	0.908	0.939	0.951	0.94
	8.5	0.971	0.928	0.988	0.975	0.953	0.859	0.934	0.951	0.888	0.954	0.97	0.949	0.966	0.953	0.915	0.978	0.903	0.915	0.953	0.933
	8.58	0.974	0.946	0.928	0.962	0.944	0.871	0.951	0.956	0.887	0.954	0.959	0.965	0.975	0.955	0.958	0.991	0.914	0.936	0.949	0.929
	8.67	0.991	0.925	0.975	0.98	0.941	0.862	0.94	0.96	0.929	0.955	0.966	0.955	0.984	0.953	0.973	0.957	0.912	0.938	0.956	0.917
	8.75	0.973	0.937	0.984	0.996	0.948	0.86	0.954	0.959	0.898	0.943	0.969	0.964	0.973	0.962	0.964	0.962	0.928	0.942	0.96	0.918
	8.83	0.987	0.935	0.98	0.981	0.936	0.887	0.977	0.959	0.917	0.937	0.968	0.959	0.974	0.95	0.965	0.971	0.943	0.949	0.965	0.936
	8.92	0.972	0.933	0.995	0.987	0.953	0.908	0.973	0.939	0.892	0.93	0.976	0.951	0.978	0.951	0.959	0.96	0.948	0.965	0.96	0.926
	9	0.971	0.932	0.975	0.994	0.965	0.915	0.973	0.938	0.92	0.93	0.97	0.948	0.965	0.958	0.959	0.955	0.958	0.973	0.975	0.941
	9.08	0.978	0.951	0.988	0.988	0.959	0.911	0.97	0.938	0.901	0.932	0.978	0.952	0.971	0.965	0.954	0.951	0.952	0.962	0.951	0.942
	9.17	0.975	0.937	0.985	1.009	0.963	0.924	0.973	0.924	0.915	0.934	0.979	0.95	0.958	0.975	0.972	0.972	0.932	0.956	0.951	0.934
	9.25	0.989	0.94	0.971	0.993	0.967	0.923	0.979	0.922	0.917	0.916	0.968	0.956	0.963	0.98	0.962	0.974	0.939	0.963	0.944	0.923
	9.33	0.975	0.941	0.986	0.997	0.965	0.917	0.962	0.929	0.899	0.915	0.963	0.956	0.996	0.967	0.956	0.994	0.92	0.957	0.95	0.926
	9.42	0.984	0.956	0.974	1	0.956	0.903	0.946	0.945	0.935	0.932	0.971	0.964	0.978	0.966	0.948	0.979	0.931	0.956	0.93	0.93
	9.5	0.995	0.956	0.976	1.003	0.946	0.91	0.956	0.966	0.904	0.933	0.975	0.96	0.986	0.959	0.97	0.977	0.947	0.962	0.951	0.929
	9.58	1.004	0.958	0.972	0.992	0.966	0.912	0.976	0.963	0.901	0.936	0.977	0.958	0.991	0.961	0.957	0.966	0.924	0.955	0.951	0.923
	9.67	0.999	0.958	0.996	0.998	0.964	0.903	0.98	0.963	0.915	0.942	0.971	0.949	0.925	0.946	0.939	0.962	0.937	0.961	0.95	0.92
	9.75	0.997	0.955	1.003	0.998	0.972	0.913	0.977	0.968	0.906	0.935	0.977	0.949	0.97	0.947	0.944	0.964	0.925	0.954	0.948	0.914
	9.83	0.962	0.939	0.997	0.993	0.98	0.913	0.978	0.958	0.892	0.933	0.946	0.936	0.989	0.937	0.956	0.954	0.946	0.954	0.956	0.915
	9.92	1.002	0.943	0.965	0.991	0.966	0.916	0.969	0.951	0.906	0.926	0.966	0.947	0.996	0.94	0.966	0.964	0.944	0.956	0.958	0.932
	10	0.987	0.96	0.982	0.996	0.968	0.924	0.967	0.941	0.851	0.926	0.966	0.94	1.004	0.951	0.954	0.978	0.972	0.95	0.963	0.935
	10.08	0.995	0.941	0.986	0.993	0.976	0.894	0.971	0.962	0.863	0.914	0.963	0.937	1.002	0.956	0.956	0.966	0.974	0.952	0.96	0.939
	10.17	1.008	0.932	0.992	0.997	0.98	0.898	0.975	0.964	0.867	0.912	0.956	0.941	0.975	0.946	0.942	0.964	0.966	0.943	0.956	0.93
	10.25	0.99	0.939	0.99	0.994	0.98	0.916	0.983	0.962	0.868	0.913	0.967	0.951	0.989	0.955	0.956	0.956	0.948	0.945	0.968	0.932
	10.33	0.98	0.963	0.979	1	0.955	0.93	0.992	0.962	0.912	0.921	0.961	0.95	0.969	0.969	0.947	0.974	0.954	0.926	0.962	0.937
	10.42	0.994	0.952	0.965	1.004	0.97	0.927	0.984	0.951	0.932	0.916	0.955	0.941	0.97	0.963	0.953	0.964	0.941	0.942	0.947	0.925
	10.5	0.991	0.933	0.973	0.994	0.974	0.926	0.981	0.946	0.948	0.918	0.95	0.946	0.972	0.964	0.932	0.954	0.966	0.935	0.944	0.919
	10.58	0.986	0.943	0.98	1.006	0.965	0.916	0.974	0.944	0.92	0.925	0.952	0.954	0.965	0.954	0.948	0.97	0.932	0.936	0.954	0.937
	10.67	0.98	0.942	0.985	0.999	0.961	0.921	0.958	0.95	0.896	0.924	0.951	0.949	0.98	0.954	0.944	0.97	0.911	0.937	0.944	0.938
	10.75	1.007	0.955	0.999	0.989	0.949	0.908	0.967	0.937	0.89	0.911	0.953	0.946	0.978	0.956	0.944	0.973	0.902	0.936	0.94	0.941
	10.83	0.997	0.957	0.993	1.007	0.957	0.911	0.959	0.913	0.906	0.912	0.941	0.944	0.983	0.956	0.953	0.955	0.904	0.924	0.942	0.941
	10.92	0.955	0.948	0.998	0.993	0.959	0.923	0.977	0.927	0.932	0.914	0.93	0.929	0.976	0.953	0.944	0.969	0.944	0.931	0.939	0.936
	11	0.957	0.947	0.995	1.003	0.966	0.918	0.978	0.929	0.932	0.915	0.95	0.938	0.957	0.954	0.938	0.98	0.931	0.916	0.94	0.931
	11.08	0.991	0.969	1.002	1.002	0.957	0.903	0.977	0.974	0.921	0.899	0.957	0.925	0.95	0.956	0.936	0.979	0.942	0.917	0.919	0.931
	11.17	0.991	0.946	0.984	1.007	0.962	0.906	0.971	0.948	0.917	0.897	0.955	0.921	0.971	0.949	0.937	0.993	0.947	0.937	0.912	0.924
	11.25	0.99	0.944	0.996	0.984	0.956	0.927	0.976	0.95	0.935	0.917	0.943	0.928	0.979	0.956	0.941	0.973	0.965	0.95	0.909	0.94
	11.33	0.98	0.936	0.988	0.999	0.984	0.928	0.961	0.926	0.921	0.913	0.946	0.937	0.98	0.94	0.943	0.983	0.966	0.931	0.919	0.933
	11.42	1.004	0.973	0.978	1.003	0.987	0.905	0.964	0.962	0.9	0.908	0.975	0.945	0.99	0.936	0.943	0.971	0.949	0.938	0.933	0.932
	11.5	0.994	0.96	0.98	1.002	0.985	0.92	0.958	0.983	0.894	0.898	0.973	0.94	0.986	0.934	0.943	0.978	0.932	0.948	0.938	0.928
	11.58	0.981	0.962	0.968	1.009	0.977	0.943	0.989	0.952	0.903	0.897	0.968	0.927	0.983	0.946	0.947	0.974	0.94	0.945	0.946	0.92
	11.67	0.969	0.939	0.977	1.008	0.957	0.951	0.987	0.957	0.905	0.895	0.968	0.926	0.979	0.927	0.945	0.966	0.952	0.944	0.945	0.911
	11.75	0.973	0.951	0.974	1.009	0.968	0.89	0.971	0.955	0.915	0.904	0.978	0.927	0.976	0.922	0.943	0.965	0.949	0.951	0.932	0.913
	11.83	0.973	0.95	0.971	0.987	0.966	0.919	0.985	0.971	0.897	0.918	0.965	0.935	0.97	0.932	0.939	0.965	0.951	0.947	0.935	0.923
	11.92	0.96	0.973	0.962	0.999	0.967	0.893	0.973	0.961	0.904	0.919	0.964	0.939	0.966	0.939	0.945	0.966	0.928	0.938	0.932	0.913
	12	0.954	0.991	0.963	1.002	0.966	0.913	0.974	0.958	0.898	0.916	0.967	0.936	0.968	0.96	0.954	0.965	0.927	0.941	0.947	0.907
	12.08	0.954	0.958	0.971	1.003	0.954	0.898	0.991	0.95	0.904	0.924	0.957	0.926	0.968	0.958	0.949	0.939	0.924	0.941	0.953	0.91
	12.17	0.953	0.965	0.97	1	0.944	0.874	0.986	0.938	0.917	0.933	0.961	0.947	0.956	0.95	0.929	0.95	0.927	0.933	0.945	0.911
	12.25	0.937	0.959	0.961	1.001	0.954	0.887	0.991	0.925	0.912	0.949	0.951	0.946	0.958	0.939	0.93	0.938	0.975	0.937	0.953	0.898
	12.33	0.945	0.964	0.963	1.004	0.952	0.87	0.985	0.916	0.911	0.957	0.958	0.941	0.972	0.933	0.919	0.945	0.95	0.939	0.961	0.888
	12.42	0.936	0.956	0.977	0.999	0.967	0.881	0.996	0.941	0.907	0.959	0.951	0.951	0.977	0.941	0.922	0.968	0.976	0.933	0.955	0.89
	12.5	0.933	0.948	0.977	1.006	0.965	0.873	0.982	0.941	0.887	0.959	0.942	0.94	0.97	0.929	0.932	0.968	0.953	0.921	0.938	0.887
	12.58	0.933	0.926	0.984	1.013	0.952	0.901	0.989	0.975	0.888	0.96	0.935	0.927	0.969	0.941	0.933	0.987	0.966	0.934	0.936	0.896
	12.67	0.927	0.963	0.973	1.018	0.964	0.902	0.982	0.956	0.931	0.959	0.942	0.925	0.956	0.93	0.934	0.985	0.978	0.919	0.961	0.905
	12.75	0.927	0.965	0.954	1.02	0.956	0.912	0.966	0.913	0.927	0.946	0.957	0.923	0.959	0.93	0.928	0.987	0.959	0.914	0.963	0.907
	12.83	0.924	0.947	0.96	1.013	0.961	0.889	0.971	0.916	0.898	0.939	0.972	0.936	0.965	0.928	0.926	1.011	0.953	0.926	0.956	0.89
	12.92	0.924	0.949	0.978	1.011	0.958	0.907	0.972	0.93	0.91	0.929	0.964	0.943	0.965	0.913	0.946	1.014	0.946	0.927	0.956	0.941
	13	0.917	0.931	0.944	1.012	0.979	0.899	0.97	0.931	0.908	0.925	0.972	0.925	0.962	0.9	0.949	0.995	0.931	0.926	0.951	0.946
	13.08	0.901	0.934	0.965	1.013	0.97	0.896	0.977	0.931	0.874	0.937	0.963	0.917	0.964	0.896	0.954	0.981	0.926	0.944	0.942	0.949
	13.17	0.913	0.957	0.967	1.021	0.953	0.904	0.963	0.947	0.893	0.937	0.957	0.924	0.961	0.88	0.955	0.999	0.93	0.936	0.941	0.948
	13.25	0.91	0.935	0.935	1.014	0.958	0.882	0.977	0.954	0.892	0.93	0.939	0.916	0.958	0.887	0.939	0.961	0.916	0.946	0.942	0.946
	13.33	0.914	0.963	0.966	1.011	0.971	0.869	0.984	0.957	0.911	0.933	0.954	0.938	0.96	0.896	0.941	0.973	0.924	0.943	0.927	0.938
	13.42	0.929	0.976	0.976	1.016	0.97	0.842	0.995	0.967	0.892	0.924	0.947	0.935	0.958	0.887	0.931	0.954	0.935	0.93	0.924	0.954
	13.5	0.924	0.953	0.971	1.007	0.974	0.834	0.995	0.957	0.893	0.927	0.948	0.881	0.963	0.888	0.905	0.969	0.92	0.925	0.937	0.938
	13.58	0.913	0.955	0.974	1.005	0.982	0.845	0.98	0.945	0.892	0.931	0.939	0.908	0.961	0.878	0.927	0.957	0.93	0.934	0.921	0.93
	13.67	0.907	0.944	0.948	1.012	0.974	0.861	1.003	0.939	0.867	0.932	0.971	0.921	0.951	0.868	0.933	0.955	0.95	0.94	0.915	0.925
	13.75	0.918	0.95	0.983	1.015	0.992	0.88	0.98	0.939	0.89	0.926	0.948	0.909	0.973	0.889	0.923	1.004	0.947	0.92	0.885	0.918
	13.83	0.906	0.921	0.98	1.006	0.97	0.902	0.976	0.944	0.892	0.925	0.958	0.894	0.98	0.884	0.906	1.014	0.952	0.907	0.906	0.911
	13.92	0.903	0.946	0.973	1.009	0.964	0.893	0.957	0.951	0.892	0.937	0.974	0.889	0.976	0.894	0.944	0.971	0.944	0.913	0.914	0.93
	14	0.897	0.934	0.962	1.005	0.957	0.891	0.994	0.939	0.867	0.934	0.971	0.909	0.97	0.903	0.964	0.962	0.923	0.918	0.92	0.927
	14.08	0.886	0.949	0.944	1.014	0.962	0.881	0.953	0.945	0.873	0.96	0.978	0.902	0.968	0.909	0.961	0.964	0.932	0.893	0.909	0.915
	14.17	0.886	0.949	0.944	1.014	0.962	0.881	0.953	0.945	0.873	0.96	0.978	0.902	0.968	0.909	0.961	0.964	0.932	0.893	0.909	0.915
	14.25	0.911	0.933	0.969	1.014	0.931	0.879	0.988	0.928	0.884	0.956	0.978	0.904	0.963	0.906	0.95	0.958	0.926	0.898	0.916	0.935
	14.33	0.885	0.973	0.969	1.023	0.964	0.876	0.968	0.91	0.875	0.957	0.959	0.913	0.983	0.898	0.937	0.968	0.923	0.918	0.918	0.929
	14.42	0.889	0.941	0.969	1.004	0.975	0.919	0.975	0.915	0.881	0.948	0.97	0.907	0.976	0.895	0.935	0.971	0.917	0.906	0.908	0.926
	14.5	0.88	0.924	0.966	1.005	0.956	0.885	0.983	0.928	0.884	0.932	0.95	0.922	0.973	0.865	0.938	1.006	0.917	0.895	0.92	0.911
	14.58	0.869	0.921	0.947	0.998	0.939	0.878	0.976	0.936	0.868	0.929	0.94	0.916	0.978	0.873	0.933	0.982	0.907	0.909	0.911	0.903
	14.67	0.874	0.952	0.971	1.025	0.971	0.863	0.984	0.925	0.864	0.927	0.953	0.923	0.981	0.894	0.917	0.968	0.948	0.891	0.917	0.903
	14.75	0.879	0.957	0.967	1.003	0.965	0.871	0.999	0.934	0.869	0.917	0.967	0.912	0.978	0.889	0.914	0.971	0.958	0.924	0.895	0.906
	14.83	0.917	0.93	0.973	1.003	0.977	0.892	0.989	0.954	0.849	0.931	0.965	0.91	0.979	0.912	0.919	0.949	0.926	0.907	0.924	0.919
	14.92	0.919	0.973	0.954	0.987	0.957	0.855	1.001	0.933	0.876	0.935	0.963	0.92	0.982	0.932	0.928	0.942	0.919	0.95	0.931	0.945
	15	0.904	0.989	0.918	0.992	0.977	0.876	0.988	0.935	0.861	0.93	0.962	0.893	0.959	0.924	0.906	0.981	0.909	0.935	0.897	0.933
	15.08	0.915	0.974	0.959	0.992	0.967	0.865	0.969	0.937	0.879	0.938	0.98	0.894	0.941	0.914	0.895	0.975	0.891	0.924	0.897	0.937
	15.17	0.886	0.944	0.97	0.995	0.958	0.9	0.976	0.936	0.872	0.958	0.971	0.881	0.933	0.914	0.915	0.954	0.902	0.91	0.913	0.927
	15.25	0.884	0.931	0.969	0.989	0.947	0.9	0.973	0.935	0.877	0.931	0.975	0.86	0.933	0.895	0.934	0.947	0.912	0.906	0.906	0.935
	15.33	0.88	0.935	0.95	0.989	0.933	0.905	0.984	0.925	0.886	0.933	0.956	0.888	0.934	0.871	0.942	0.992	0.961	0.902	0.914	0.908
	15.42	0.877	0.955	0.966	0.994	0.959	0.886	0.99	0.928	0.866	0.912	0.959	0.879	0.98	0.869	0.927	0.959	0.924	0.901	0.9	0.97
	15.5	0.881	0.949	0.963	0.991	0.948	0.873	0.977	0.924	0.842	0.899	0.941	0.917	0.975	0.849	0.888	0.983	0.938	0.88	0.899	0.93
	15.58	0.878	0.965	0.941	0.972	0.951	0.869	0.988	0.906	0.907	0.948	0.934	0.909	0.952	0.846	0.948	0.969	0.908	0.898	0.897	0.943
	15.67	0.874	0.941	0.949	0.97	0.951	0.866	0.982	0.912	0.903	0.942	0.952	0.907	0.961	0.853	0.937	0.984	0.932	0.921	0.88	0.95
	15.75	0.886	0.956	0.946	0.962	0.954	0.862	0.974	0.915	0.894	0.918	0.962	0.882	0.997	0.85	0.911	1.019	0.925	0.901	0.893	0.949
	15.83	0.903	0.94	0.948	0.991	0.951	0.861	0.99	0.933	0.894	0.91	0.949	0.902	0.989	0.831	0.911	1.011	0.93	0.905	0.901	0.943
	15.92	0.895	0.959	0.954	0.983	0.937	0.902	0.985	0.926	0.884	0.918	0.954	0.899	0.981	0.832	0.949	0.997	0.936	0.913	0.892	0.94
	16	0.872	0.958	0.951	0.982	0.962	0.88	0.98	0.923	0.899	0.922	0.972	0.913	0.952	0.84	0.931	0.975	0.941	0.882	0.872	0.941
	16.08	0.877	0.951	0.973	0.988	0.965	0.847	0.987	0.92	0.922	0.923	0.964	0.905	0.953	0.846	0.944	0.974	0.93	0.896	0.866	0.94
	16.17	0.894	0.931	0.976	0.995	0.955	0.842	0.989	0.927	0.92	0.93	0.971	0.91	0.949	0.856	0.935	0.977	0.918	0.887	0.898	0.934
	16.25	0.937	0.949	0.951	0.975	0.914	0.852	0.985	0.935	0.907	0.927	0.991	0.906	0.946	0.867	0.933	0.983	0.913	0.888	0.898	0.951
	16.33	0.93	0.932	0.965	0.97	0.925	0.864	0.98	0.945	0.903	0.923	0.946	0.919	0.935	0.844	0.962	0.962	0.893	0.914	0.874	0.923
	16.42	0.938	0.939	0.96	0.97	0.939	0.872	0.961	0.944	0.892	0.907	0.95	0.912	0.937	0.849	0.956	0.962	0.877	0.912	0.884	0.917
	16.5	0.919	0.938	0.956	0.978	0.933	0.899	0.96	0.938	0.869	0.896	0.952	0.9	0.929	0.85	0.954	0.955	0.902	0.91	0.9	0.927
	16.58	0.925	0.946	0.946	0.967	0.958	0.888	0.986	0.94	0.884	0.912	0.932	0.903	0.94	0.882	0.937	0.945	0.882	0.918	0.882	0.929
	16.67	0.908	0.962	0.942	0.972	0.956	0.875	0.989	0.933	0.889	0.899	0.973	0.909	0.929	0.89	0.922	0.951	0.93	0.928	0.896	0.953
	16.75	0.882	0.953	0.941	0.98	0.957	0.848	0.982	0.932	0.9	0.903	0.964	0.898	0.949	0.885	0.923	0.973	0.88	0.904	0.882	0.96
	16.83	0.891	0.958	0.937	0.977	0.936	0.857	0.988	0.915	0.906	0.945	0.951	0.91	0.939	0.885	0.926	0.972	0.901	0.918	0.886	0.937
	16.92	0.913	0.971	0.953	0.99	0.94	0.858	0.977	0.936	0.918	0.951	0.953	0.912	0.953	0.879	0.904	0.952	0.878	0.924	0.895	0.955
	17	0.911	0.933	0.952	0.984	0.943	0.857	0.998	0.922	0.871	0.948	0.938	0.889	0.938	0.859	0.911	1.003	0.903	0.927	0.892	0.944
	17.08	0.915	0.933	0.938	0.972	0.937	0.907	0.982	0.95	0.864	0.943	0.931	0.892	0.916	0.836	0.912	0.946	0.947	0.936	0.896	0.943
	17.17	0.909	0.913	0.949	0.986	0.925	0.903	0.967	0.924	0.863	0.93	0.965	0.889	0.898	0.839	0.912	0.979	0.916	0.925	0.896	0.942
	17.25	0.881	0.957	0.95	0.98	0.926	0.853	0.987	0.952	0.875	0.926	0.96	0.88	0.905	0.85	0.92	1.025	0.903	0.936	0.898	0.94
	17.33	0.875	0.942	0.958	0.985	0.924	0.864	0.967	0.953	0.893	0.909	0.959	0.883	0.894	0.86	0.935	1.004	0.914	0.926	0.869	0.933
	17.42	0.877	0.943	0.962	0.999	0.933	0.864	0.981	0.943	0.885	0.91	0.944	0.875	0.892	0.863	0.919	0.993	0.899	0.933	0.871	0.945
	17.5	0.916	0.94	0.954	1.026	0.927	0.877	0.981	0.958	0.882	0.902	0.957	0.895	0.884	0.86	0.889	0.987	0.904	0.931	0.872	0.927
	17.58	0.921	0.934	0.938	1.011	0.911	0.861	0.983	0.949	0.883	0.918	0.947	0.884	0.889	0.863	0.95	0.967	0.872	0.935	0.886	0.912
	17.67	0.911	0.919	0.93	1.009	0.908	0.866	0.983	0.952	0.877	0.925	0.927	0.893	0.882	0.878	0.906	0.953	0.898	0.938	0.864	0.9
	17.75	0.932	0.965	0.929	1.018	0.918	0.86	0.978	0.952	0.849	0.912	0.935	0.867	0.891	0.876	0.893	0.977	0.891	0.918	0.866	0.901
	17.83	0.937	0.918	0.931	0.99	0.911	0.867	0.976	0.956	0.862	0.911	0.923	0.886	0.883	0.864	0.893	0.95	0.875	0.926	0.872	0.893
	17.92	0.912	0.926	0.933	1.026	0.909	0.85	0.981	0.94	0.867	0.903	0.912	0.883	0.884	0.869	0.899	0.951	0.859	0.92	0.875	0.907
	18	0.9	0.922	0.932	1.025	0.936	0.863	1.003	0.932	0.846	0.901	0.895	0.859	0.877	0.908	0.931	0.944	0.839	0.921	0.886	0.898
	18.08	0.927	0.993	0.961	1.013	0.951	0.815	0.985	0.937	0.883	0.924	0.929	0.844	0.928	0.914	0.927	0.958	0.851	0.923	0.91	0.908
	18.17	0.944	1.002	0.964	1.049	0.949	0.818	0.991	0.944	0.88	0.916	0.919	0.854	0.925	0.924	0.964	0.962	0.848	0.921	0.923	0.928
	18.25	0.931	0.968	0.949	1.038	0.936	0.868	0.994	0.927	0.866	0.926	0.901	0.839	0.929	0.905	0.97	0.978	0.837	0.937	0.916	0.935
	18.33	0.912	0.957	0.953	1.038	0.948	0.866	0.981	0.921	0.854	0.928	0.915	0.899	0.91	0.878	0.953	0.992	0.838	0.95	0.911	0.924
	18.42	0.907	0.944	0.958	1.027	0.928	0.847	0.96	0.924	0.857	0.946	0.897	0.888	0.924	0.881	0.94	0.995	0.843	0.913	0.903	0.915
	18.5	0.878	0.935	0.967	1.045	0.945	0.86	0.963	0.917	0.836	0.946	0.866	0.876	0.93	0.87	0.922	1.001	0.835	0.912	0.906	0.932
	18.58	0.895	0.933	0.965	1.04	0.935	0.845	0.965	0.908	0.8	0.927	0.899	0.894	0.929	0.873	0.912	0.975	0.836	0.915	0.901	0.913
	18.67	0.892	0.92	0.96	1.033	0.939	0.843	0.952	0.906	0.865	0.922	0.925	0.898	0.962	0.879	0.897	0.961	0.838	0.911	0.881	0.912
	18.75	0.893	0.901	0.958	1.027	0.923	0.849	0.955	0.928	0.868	0.917	0.916	0.895	0.944	0.881	0.914	0.952	0.855	0.924	0.875	0.925
	18.83	0.896	0.896	0.945	1.055	0.923	0.845	0.96	0.914	0.853	0.903	0.904	0.903	0.943	0.885	0.897	0.969	0.874	0.909	0.889	0.922
	18.92	0.905	0.9	0.934	1.044	0.914	0.86	0.962	0.939	0.839	0.908	0.888	0.899	0.948	0.876	0.905	0.953	0.888	0.917	0.889	0.907
	19	0.897	0.906	0.907	1.04	0.906	0.851	0.954	0.917	0.825	0.91	0.879	0.891	0.902	0.897	0.91	0.937	0.857	0.93	0.896	0.907
	19.08	0.896	0.902	0.967	1.025	0.909	0.844	0.939	0.915	0.871	0.891	0.887	0.867	0.92	0.894	0.898	0.939	0.857	0.928	0.877	0.907
	19.17	0.88	0.905	0.942	1.041	0.906	0.837	0.927	0.942	0.88	0.897	0.896	0.893	0.902	0.885	0.87	0.977	0.841	0.926	0.873	0.895
	19.25	0.886	0.897	0.93	1.057	0.931	0.851	0.931	0.966	0.892	0.904	0.891	0.888	0.897	0.871	0.926	0.959	0.855	0.941	0.869	0.893
	19.33	0.876	0.874	0.937	1.061	0.929	0.854	0.919	0.977	0.873	0.899	0.866	0.89	0.908	0.903	0.936	0.941	0.841	0.943	0.862	0.891
	19.42	0.893	0.897	0.933	1.035	0.949	0.829	0.923	0.976	0.896	0.901	0.881	0.883	0.908	0.903	0.944	0.95	0.846	0.925	0.87	0.886
	19.5	0.898	0.896	0.937	1.017	0.942	0.856	0.916	0.948	0.871	0.889	0.906	0.892	0.93	0.903	0.929	0.963	0.854	0.946	0.858	0.891
	19.58	0.903	0.946	0.942	1.057	0.92	0.86	0.965	0.94	0.874	0.903	0.902	0.872	0.9	0.888	0.935	0.928	0.856	0.956	0.869	0.897
	19.67	0.908	0.952	0.973	1.055	0.923	0.841	0.939	0.903	0.871	0.897	0.941	0.889	0.919	0.879	0.914	0.937	0.852	0.935	0.855	0.879
	19.75	0.917	0.911	0.941	1.073	0.922	0.839	0.937	0.896	0.899	0.892	0.894	0.867	0.911	0.88	0.909	0.93	0.842	0.929	0.866	0.877
	19.83	0.919	0.946	0.944	1.034	0.916	0.855	0.965	0.899	0.881	0.892	0.872	0.878	0.95	0.877	0.904	0.956	0.86	0.968	0.877	0.879
	19.92	0.944	0.939	0.95	1.016	0.885	0.839	0.933	0.908	0.901	0.911	0.861	0.891	0.955	0.877	0.9	0.941	0.852	0.957	0.883	0.892
	20	0.916	0.911	0.982	1.029	0.88	0.853	0.914	0.897	0.909	0.917	0.871	0.876	0.919	0.883	0.902	0.92	0.829	0.957	0.872	0.89
	20.08	0.905	0.927	0.933	1.03	0.894	0.822	0.89	0.888	0.91	0.923	0.894	0.876	0.939	0.886	0.893	0.975	0.856	0.94	0.885	0.889
	20.17	0.896	0.896	0.926	1.028	0.896	0.836	0.894	0.874	0.9	0.925	0.887	0.885	0.926	0.901	0.885	0.952	0.881	0.953	0.861	0.882
	20.25	0.887	0.868	0.911	1.013	0.9	0.815	0.897	0.881	0.909	0.91	0.881	0.901	0.929	0.92	0.862	0.927	0.857	0.938	0.884	0.881
	20.33	0.876	0.879	0.894	1.018	0.903	0.837	0.912	0.872	0.896	0.916	0.878	0.906	0.92	0.912	0.88	0.907	0.827	0.941	0.882	0.877
	20.42	0.873	0.922	0.95	1.023	0.927	0.849	0.908	0.897	0.906	0.901	0.887	0.911	0.917	0.914	0.901	0.917	0.842	0.93	0.852	0.876
	20.5	0.895	0.923	0.948	1.034	0.943	0.818	0.89	0.883	0.937	0.897	0.887	0.935	0.898	0.902	0.86	0.928	0.834	0.94	0.903	0.948
	20.58	0.855	0.908	0.966	1.016	0.929	0.827	0.933	0.895	0.956	0.907	0.874	0.906	0.912	0.899	0.899	0.92	0.89	0.951	0.89	0.954
	20.67	0.868	0.916	0.946	1.016	0.938	0.817	0.934	0.889	0.948	0.908	0.875	0.948	0.901	0.919	0.88	0.885	0.882	0.923	0.883	0.937
	20.75	0.869	0.889	0.947	1.008	0.942	0.865	0.951	0.881	0.894	0.893	0.889	0.926	0.895	0.923	0.879	0.947	0.874	0.945	0.871	0.937
	20.83	0.885	0.884	0.952	1.018	0.938	0.845	0.964	0.855	0.893	0.886	0.909	0.911	0.887	0.862	0.898	0.903	0.881	0.96	0.846	0.895
	20.92	0.901	0.925	0.933	1.027	0.932	0.817	0.96	0.871	0.901	0.904	0.929	0.894	0.904	0.905	0.903	0.893	0.893	0.958	0.862	0.904
	21	0.899	0.951	0.954	1.013	0.92	0.839	0.95	0.869	0.894	0.898	0.904	0.893	0.89	0.909	0.946	0.867	0.87	0.958	0.887	0.899
	21.08	0.906	0.869	0.952	1.006	0.923	0.811	0.927	0.89	0.899	0.909	0.893	0.893	0.884	0.927	0.949	0.951	0.857	0.957	0.893	0.894
	21.17	0.907	0.867	0.95	1.026	0.925	0.818	0.932	0.893	0.882	0.904	0.88	0.894	0.929	0.872	0.912	0.991	0.874	0.932	0.895	0.91
	21.25	0.906	0.892	0.938	1.019	0.904	0.848	0.912	0.95	0.884	0.899	0.88	0.891	0.941	0.898	0.905	0.948	0.87	0.933	0.897	0.91
	21.33	0.916	0.907	0.938	1.008	0.897	0.809	0.91	0.931	0.879	0.896	0.896	0.907	0.941	0.931	0.884	0.922	0.884	0.909	0.903	0.908
	21.42	0.894	0.899	0.934	1.027	0.919	0.85	0.918	0.945	0.877	0.904	0.888	0.888	0.921	0.932	0.888	0.916	0.873	0.92	0.887	0.915
	21.5	0.885	0.892	0.932	1.027	0.918	0.868	0.921	0.916	0.883	0.913	0.881	0.882	0.92	0.9	0.874	0.902	0.878	0.935	0.879	0.951
	21.58	0.869	0.976	0.928	0.991	0.887	0.836	0.933	0.879	0.869	0.956	0.879	0.893	0.917	0.91	0.884	0.893	0.877	0.932	0.88	0.934
	21.67	0.855	0.923	0.952	0.996	0.868	0.84	0.936	0.865	0.843	0.955	0.857	0.896	0.886	0.926	0.951	0.965	0.88	0.948	0.866	0.912
	21.75	0.851	0.923	0.939	0.99	0.874	0.791	0.904	0.923	0.877	0.933	0.872	0.883	0.877	0.917	0.93	0.929	0.871	0.916	0.863	0.906
	21.83	0.859	0.911	0.934	1.012	0.887	0.817	0.892	0.918	0.883	0.911	0.856	0.87	0.861	0.935	0.897	0.902	0.859	0.911	0.86	0.907
	21.92	0.874	0.909	0.964	1.017	0.899	0.876	0.905	0.903	0.859	0.91	0.855	0.891	0.86	0.909	0.925	0.931	0.858	0.945	0.851	0.91
	22	0.877	0.911	0.985	1.013	0.899	0.868	0.928	0.87	0.842	0.912	0.885	0.906	0.856	0.925	0.915	0.894	0.87	0.968	0.856	0.89
	22.08	0.879	0.948	0.962	1.008	0.923	0.875	0.937	0.862	0.879	0.91	0.884	0.894	0.848	0.91	0.912	0.926	0.874	0.941	0.872	0.894
	22.17	0.886	0.933	0.954	0.991	0.906	0.872	0.946	0.862	0.88	0.91	0.876	0.895	0.839	0.903	0.897	0.923	0.858	0.932	0.861	0.885
	22.25	0.878	0.921	0.946	0.987	0.868	0.887	0.925	0.852	0.883	0.903	0.871	0.914	0.849	0.902	0.876	0.894	0.849	0.924	0.854	0.9
	22.33	0.861	0.932	0.958	0.981	0.886	0.884	0.894	0.854	0.893	0.901	0.874	0.876	0.849	0.938	0.865	0.906	0.873	0.932	0.835	0.914
	22.42	0.863	0.934	0.943	0.976	0.886	0.874	0.913	0.862	0.88	0.912	0.878	0.875	0.841	0.919	0.875	0.95	0.872	0.947	0.855	0.911
	22.5	0.876	0.94	0.943	0.987	0.882	0.888	0.91	0.846	0.864	0.908	0.901	0.898	0.851	0.934	0.838	0.96	0.855	0.962	0.903	0.922
	22.58	0.84	0.894	0.919	0.996	0.868	0.898	0.901	0.835	0.87	0.909	0.89	0.887	0.864	0.892	0.893	0.966	0.859	0.946	0.901	0.944
	22.67	0.823	0.944	0.956	0.997	0.872	0.906	0.922	0.837	0.854	0.917	0.888	0.889	0.908	0.891	0.896	0.906	0.889	0.936	0.896	0.951
	22.75	0.872	0.94	0.956	0.979	0.881	0.91	0.945	0.849	0.92	0.923	0.869	0.875	0.919	0.889	0.878	0.929	0.895	0.973	0.903	0.968
	22.83	0.9	0.958	0.948	1.051	0.893	0.913	0.943	0.869	0.941	0.94	0.86	0.933	0.902	0.944	1.004	0.951	0.974	0.996	0.911	0.937
	22.92	0.853	0.921	0.976	1.02	0.895	0.883	0.963	0.89	0.925	0.936	0.84	0.891	0.885	0.94	0.911	0.963	0.924	0.974	0.912	0.941
	23	0.834	0.89	0.987	1.01	0.902	0.895	0.954	0.914	0.931	0.93	0.832	0.871	0.887	0.92	0.857	0.94	0.906	0.952	0.874	0.918
	23.08	0.83	0.872	0.934	0.973	0.893	0.912	0.969	0.9	0.899	0.905	0.787	0.851	0.89	0.91	0.862	0.923	0.881	0.941	0.869	0.919
	23.17	0.854	0.921	0.981	0.987	0.909	0.881	0.909	0.858	0.896	0.894	0.865	0.868	0.875	0.914	0.853	0.931	0.858	0.931	0.884	0.93
	23.25	0.827	0.925	0.971	0.986	0.906	0.888	0.927	0.903	0.884	0.88	0.788	0.887	0.886	0.909	0.837	0.959	0.851	0.918	0.893	0.92
	23.33	0.812	0.899	0.96	0.977	0.914	0.897	0.94	0.89	0.875	0.875	0.8	0.885	0.878	0.91	0.847	0.929	0.867	0.919	0.906	0.919
	23.42	0.81	0.895	0.929	0.985	0.936	0.878	0.98	0.877	0.9	0.877	0.801	0.888	0.86	0.887	0.845	0.955	0.871	0.91	0.905	0.916
	23.5	0.799	0.892	0.942	0.954	0.931	0.871	0.988	0.87	0.897	0.877	0.814	0.894	0.882	0.882	0.829	0.926	0.875	0.906	0.905	0.928
	23.58	0.825	0.923	0.937	0.958	0.932	0.903	0.958	0.882	0.901	0.884	0.827	0.914	0.894	0.927	0.85	0.923	0.878	0.915	0.904	0.919
	23.67	0.812	0.902	0.943	0.967	0.922	0.907	0.957	0.865	0.916	0.883	0.83	0.937	0.86	0.957	0.847	0.928	0.852	0.9	0.901	0.93
	23.75	0.83	0.898	0.952	0.956	0.926	0.906	0.961	0.858	0.916	0.852	0.831	0.927	0.886	0.971	0.839	0.901	0.852	0.898	0.894	0.928
	23.83	0.838	0.912	0.955	0.967	0.923	0.913	0.961	0.864	0.896	0.872	0.907	0.953	0.877	0.936	0.836	0.921	0.862	0.911	0.887	0.914
	23.92	0.844	0.917	0.959	0.963	0.926	0.905	0.961	0.858	0.914	0.902	0.87	0.932	0.878	0.944	0.847	0.911	0.855	0.909	0.896	0.921
	24	0.832	0.925	0.953	0.968	0.914	0.898	0.965	0.841	0.926	0.892	0.867	0.918	0.895	0.938	0.859	0.903	0.911	0.912	0.903	0.906
	24.08	0.863	0.912	0.939	0.971	0.924	0.905	0.965	0.861	0.934	0.881	0.856	0.91	0.849	0.922	0.848	0.963	0.927	0.913	0.887	0.909
	24.17	0.88	0.904	0.959	0.959	0.917	0.917	0.956	0.839	0.924	0.879	0.848	0.894	0.84	0.886	0.847	0.987	0.903	0.904	0.896	0.924
	24.25	0.849	0.946	0.986	0.934	0.904	0.956	0.96	0.842	0.907	0.868	0.851	0.895	0.858	0.902	0.873	0.965	0.875	0.91	0.89	0.907
	24.33	0.831	0.935	0.991	0.928	0.912	0.939	0.969	0.837	0.92	0.891	0.881	0.888	0.894	0.929	0.861	0.945	0.886	0.902	0.891	0.946
	24.42	0.814	0.917	1.003	0.969	0.934	0.978	0.975	0.855	0.92	0.921	0.872	0.877	0.89	0.907	0.861	0.918	0.85	0.962	0.911	0.947
	24.5	0.8	0.9	1.012	0.967	0.924	0.922	0.984	0.899	0.893	0.914	0.848	0.868	0.881	0.931	0.901	0.957	0.881	0.956	0.889	0.954
	24.58	0.818	0.919	0.961	1.002	0.922	0.935	1.003	0.89	0.871	0.899	0.839	0.878	0.88	0.926	0.891	0.943	0.884	0.942	0.885	0.934
	24.67	0.827	0.962	0.991	0.977	0.921	0.939	0.99	0.876	0.885	0.901	0.858	0.879	0.883	0.951	0.912	0.951	0.902	0.944	0.894	0.917
	24.75	0.835	0.937	0.923	0.99	0.966	0.93	1.007	0.868	0.878	0.911	0.841	0.868	0.871	0.92	0.911	0.991	0.866	0.938	0.893	0.915
	24.83	0.842	0.921	0.946	0.96	0.967	0.924	1.009	0.896	0.866	0.915	0.805	0.861	0.873	0.895	0.881	0.957	0.868	0.932	0.916	0.904
	24.92	0.834	0.917	0.972	0.939	0.927	0.934	0.985	0.874	0.889	0.911	0.808	0.876	0.865	0.914	0.893	0.979	0.876	0.938	0.918	0.891
	25	0.825	0.938	0.981	0.951	0.925	0.93	0.968	0.867	0.915	0.913	0.845	0.873	0.864	0.944	0.9	0.973	0.87	0.941	0.906	0.897
	25.08	0.838	0.932	0.949	0.935	0.901	0.939	1.012	0.849	0.926	0.925	0.864	0.85	0.856	0.943	0.896	0.978	0.868	0.925	0.877	0.899
	25.17	0.824	0.938	0.95	0.96	0.917	0.927	1.026	0.862	0.91	0.906	0.829	0.848	0.847	0.941	0.89	0.973	0.874	0.907	0.864	0.876
	25.25	0.824	0.968	0.956	0.956	0.918	0.94	1.014	0.874	0.911	0.902	0.825	0.864	0.84	0.953	0.932	0.984	0.879	0.912	0.863	0.88
	25.33	0.812	0.993	0.984	0.971	0.92	0.942	0.969	0.864	0.88	0.903	0.836	0.857	0.849	0.946	0.929	0.983	0.862	0.915	0.882	0.897
	25.42	0.806	0.967	0.984	0.916	0.895	0.979	0.981	0.874	0.877	0.898	0.844	0.832	0.849	0.932	0.925	1	0.846	0.918	0.89	0.907
	25.5	0.789	0.944	0.982	0.95	0.923	0.946	0.98	0.864	0.854	0.915	0.824	0.817	0.853	0.94	0.92	1.01	0.845	0.909	0.884	0.892
	25.58	0.822	0.928	0.987	0.938	0.927	0.959	0.98	0.905	0.883	0.959	0.846	0.85	0.853	0.958	0.942	0.972	0.906	0.925	0.877	0.875
	25.67	0.823	0.955	0.968	0.946	0.948	0.959	0.98	0.894	0.873	0.968	0.837	0.869	0.836	0.949	0.937	0.98	0.88	0.93	0.869	0.866
	25.75	0.795	0.95	0.957	0.941	0.919	0.953	0.983	0.881	0.862	0.949	0.842	0.846	0.84	0.962	0.929	0.975	0.864	0.919	0.835	0.863
	25.83	0.811	0.965	0.957	0.942	0.93	0.937	0.986	0.866	0.847	0.941	0.825	0.869	0.853	0.948	0.919	1.02	0.858	0.923	0.814	0.862
	25.92	0.811	0.935	0.974	0.929	0.895	0.927	1.003	0.862	0.861	0.93	0.831	0.88	0.854	0.93	0.929	1.001	0.837	0.903	0.81	0.862
	26	0.813	0.97	0.974	0.929	0.923	0.926	0.971	0.857	0.882	0.931	0.847	0.917	0.844	0.932	0.924	0.956	0.842	0.903	0.819	0.859
	26.08	0.813	0.939	0.972	0.925	0.933	0.942	0.961	0.884	0.889	0.931	0.87	0.904	0.872	0.903	0.918	0.939	0.835	0.909	0.838	0.855
	26.17	0.812	0.89	0.971	0.908	0.947	0.928	0.958	0.875	0.881	0.927	0.849	0.88	0.877	0.937	0.932	0.971	0.849	0.901	0.834	0.844
	26.25	0.82	0.923	0.994	0.903	0.938	0.949	0.954	0.857	0.857	0.921	0.846	0.883	0.877	0.957	0.935	0.959	0.864	0.916	0.831	0.852
	26.33	0.816	0.939	0.994	0.907	0.917	0.945	0.979	0.848	0.882	0.932	0.842	0.884	0.881	0.914	0.919	0.989	0.859	0.896	0.841	0.85
	26.42	0.844	0.925	0.954	0.926	0.911	0.976	1.003	0.909	0.882	0.943	0.839	0.874	0.847	0.914	0.912	1.006	0.833	0.915	0.85	0.856
	26.5	0.848	0.918	0.951	0.925	0.922	0.953	1.014	0.917	0.88	0.927	0.825	0.911	0.846	0.932	0.916	1.004	0.872	0.917	0.825	0.886
	26.58	0.853	0.933	0.948	0.899	0.903	0.972	1.004	0.9	0.903	0.946	0.816	0.887	0.859	0.961	0.924	0.964	0.863	0.933	0.824	0.905
	26.67	0.852	0.943	0.969	0.912	0.933	0.984	0.994	0.905	0.916	0.941	0.823	0.883	0.899	0.946	0.944	0.983	0.859	0.965	0.821	0.893
	26.75	0.809	0.988	0.965	0.907	0.942	0.968	0.997	0.924	0.925	0.942	0.825	0.878	0.901	0.946	0.916	0.938	0.852	0.937	0.822	0.889
	26.83	0.824	0.983	0.975	0.926	0.947	0.956	0.992	0.919	0.882	0.958	0.81	0.88	0.93	0.912	0.925	0.962	0.911	0.939	0.843	0.899
	26.92	0.821	0.972	0.991	0.914	0.946	0.947	0.971	0.928	0.862	0.957	0.835	0.872	0.925	0.978	0.916	0.923	0.906	0.94	0.841	0.904
	27	0.803	0.937	0.986	0.922	0.924	0.959	0.969	0.906	0.827	0.957	0.821	0.893	0.935	0.971	0.917	0.906	0.911	0.933	0.826	0.907
	27.08	0.853	0.953	0.972	0.958	0.934	0.981	0.988	0.901	0.823	0.975	0.848	0.882	0.915	0.967	0.912	0.95	0.882	0.93	0.829	0.901
	27.17	0.82	0.954	0.983	0.941	0.932	0.958	0.997	0.908	0.824	0.976	0.839	0.871	0.939	0.956	0.942	0.966	0.885	0.933	0.839	0.897
	27.25	0.815	0.94	0.995	0.934	0.926	0.927	0.986	0.908	0.829	0.964	0.82	0.899	0.944	0.948	0.925	0.93	0.891	0.933	0.833	0.912
	27.33	0.804	0.962	0.968	0.951	0.946	0.959	0.972	0.925	0.831	0.963	0.823	0.89	0.94	0.931	0.932	0.937	0.9	0.929	0.824	0.911
	27.42	0.804	0.966	0.946	0.93	0.918	0.992	0.967	0.928	0.837	0.954	0.833	0.878	0.917	0.923	0.94	0.923	0.904	0.932	0.808	0.908
	27.5	0.805	0.982	0.951	0.953	0.937	1.007	0.967	0.924	0.821	0.933	0.818	0.885	0.955	0.918	0.913	0.936	0.915	0.91	0.785	0.886
	27.58	0.821	0.967	0.972	0.99	0.944	0.986	1.02	0.946	0.814	0.934	0.86	0.89	0.957	0.922	0.944	0.961	0.905	0.906	0.785	0.885
	27.67	0.818	1.008	0.991	0.961	0.932	0.963	0.994	0.932	0.846	0.932	0.884	0.907	0.963	0.909	0.926	0.982	0.887	0.888	0.792	0.881
	27.75	0.803	0.983	0.969	0.972	0.933	0.976	1.003	0.969	0.877	0.938	0.816	0.874	0.946	0.905	0.93	0.903	0.886	0.912	0.847	0.888
	27.83	0.869	0.986	0.963	0.969	0.937	0.961	0.994	0.964	0.835	0.938	0.841	0.939	0.951	0.902	0.955	0.899	0.868	0.924	0.838	0.874
	27.92	0.866	0.94	0.942	0.979	0.938	0.968	0.987	0.95	0.822	0.958	0.811	0.948	0.95	0.878	0.929	0.886	0.872	0.92	0.837	0.882
	28	0.86	0.926	0.966	0.995	0.951	0.963	1	0.902	0.809	0.952	0.8	0.934	0.938	0.96	0.958	0.881	0.869	0.9	0.821	0.872
	28.08	0.868	0.959	0.947	0.989	0.945	0.971	1.013	0.944	0.855	0.951	0.866	0.95	0.929	0.943	0.94	0.872	0.866	0.904	0.852	0.877
	28.17	0.877	0.942	0.968	0.988	0.968	0.948	0.979	0.962	0.856	0.947	0.853	0.928	0.975	0.937	0.894	0.854	0.92	0.943	0.814	0.868
	28.25	0.884	0.973	0.963	0.995	0.971	0.969	0.983	0.937	0.837	0.937	0.855	0.933	0.969	0.925	0.898	0.907	0.916	0.958	0.833	0.899
	28.33	0.874	1	0.949	0.996	0.979	0.965	0.977	0.932	0.832	0.928	0.854	0.923	0.954	0.95	0.885	0.95	0.875	0.964	0.865	0.956
	28.42	0.888	1.004	0.939	0.992	0.929	0.928	0.97	0.979	0.87	0.923	0.846	0.912	0.973	0.945	0.888	0.954	0.86	0.941	0.878	0.985
	28.5	0.89	0.984	0.935	0.99	0.949	0.927	0.963	0.954	0.866	0.935	0.85	0.902	0.944	0.922	0.88	0.922	0.932	0.939	0.881	0.909
	28.58	0.904	0.943	0.971	0.991	0.907	0.959	0.97	0.919	0.859	0.962	0.853	0.905	0.984	0.942	0.898	0.906	0.888	0.927	0.884	0.904
	28.67	0.897	0.949	0.954	1.003	0.927	0.975	0.988	0.924	0.834	0.957	0.875	0.932	0.994	0.942	0.902	0.9	0.876	0.951	0.846	0.897
	28.75	0.925	0.93	0.93	1.003	0.941	0.986	0.998	0.935	0.857	0.981	0.883	0.91	0.928	0.95	0.895	0.898	0.908	0.937	0.868	0.901
	28.83	0.927	0.945	0.93	0.991	0.948	0.976	0.994	0.919	0.846	0.955	0.894	0.882	0.943	0.946	0.912	0.885	0.894	0.919	0.875	0.922
	28.92	0.905	0.941	0.976	1.001	0.947	0.983	1.009	0.942	0.841	0.922	0.89	0.905	0.912	0.968	0.932	0.858	0.899	0.915	0.877	0.921
	29	0.894	0.952	0.961	0.997	0.915	0.971	0.978	0.932	0.861	0.926	0.892	0.948	0.952	0.938	0.905	0.868	0.89	0.907	0.889	0.919
	29.08	0.913	0.985	0.954	1.007	0.922	0.966	0.983	0.956	0.859	0.929	0.898	0.941	0.93	0.916	0.911	0.884	0.869	0.937	0.895	0.914
	29.17	0.914	0.971	0.953	1.004	0.935	0.989	0.973	0.979	0.842	0.931	0.899	0.922	0.915	0.893	0.891	0.894	0.903	0.938	0.903	0.911
	29.25	0.918	0.984	0.939	1.011	0.994	1.002	0.948	0.983	0.872	0.965	0.911	0.899	0.911	0.923	0.925	0.867	0.905	0.933	0.915	0.919
	29.33	0.915	0.983	0.951	0.998	0.933	0.991	0.957	0.952	0.839	0.958	0.897	0.933	0.908	0.942	0.944	0.865	0.897	0.93	0.92	0.92
	29.42	0.938	0.975	0.965	1.004	0.946	0.996	0.978	0.988	0.864	0.962	0.932	0.915	0.904	0.938	0.939	0.885	0.883	0.935	0.94	0.916
	29.5	0.982	0.963	0.967	0.984	0.95	0.995	0.984	0.994	0.855	0.985	0.933	0.919	0.935	0.935	0.948	0.9	0.895	0.94	0.935	0.905
	29.58	0.948	0.953	0.972	0.999	0.936	0.974	0.968	0.942	0.847	0.976	0.903	0.94	0.938	0.957	0.937	0.875	0.936	0.933	0.927	0.914
	29.67	0.947	0.943	0.981	1.007	0.934	0.963	0.93	0.972	0.892	0.974	0.88	0.964	0.964	0.949	0.928	0.924	0.942	0.91	0.903	0.952
	29.75	0.945	0.973	0.967	0.98	0.924	0.964	0.936	0.961	0.885	0.943	0.914	0.939	0.917	0.939	0.932	0.925	0.911	0.924	0.918	0.947
	29.83	0.945	0.99	0.965	0.987	0.925	1.006	0.946	0.935	0.854	0.911	0.902	0.937	0.899	0.909	0.909	0.885	0.877	0.936	0.928	0.932
	29.92	0.938	0.925	0.941	0.992	0.924	1.001	0.947	0.936	0.871	0.918	0.899	0.927	0.921	0.928	0.913	0.863	0.886	0.938	0.918	0.9
	30	0.937	0.898	0.925	0.984	0.919	1.008	0.963	0.95	0.912	0.927	0.901	0.922	0.93	0.911	0.891	0.857	0.895	0.936	0.934	0.906
	30.08	0.975	0.9	0.936	1.029	0.925	0.99	0.981	0.938	0.907	0.909	0.898	0.943	0.929	0.899	0.894	0.878	0.866	0.972	0.935	0.902
	30.17	0.967	0.891	0.945	1.007	0.916	0.96	0.984	0.941	0.901	0.914	0.925	0.948	0.95	0.919	0.886	0.907	0.887	0.958	0.918	0.899
	30.25	0.959	0.887	0.948	1.001	0.905	0.992	0.945	0.945	0.902	0.918	0.926	0.918	0.981	0.885	0.919	0.904	0.862	0.966	0.917	0.906
	30.33	0.949	0.922	0.946	1.018	0.911	0.977	0.93	0.938	0.928	0.923	0.918	0.904	0.991	0.912	0.901	0.9	0.907	0.933	0.928	0.936
	30.42	0.965	0.946	0.955	1.021	0.941	0.98	0.921	0.967	0.891	0.959	0.928	0.938	0.961	0.909	0.9	0.898	0.924	0.923	0.945	0.926
	30.5	0.981	0.929	0.95	1.017	0.936	0.984	0.929	0.997	0.891	0.948	0.92	0.951	0.95	0.892	0.901	0.899	0.896	0.905	0.953	0.926
	30.58	0.96	0.937	0.953	1.025	0.952	0.988	0.971	0.978	0.882	0.954	0.904	0.927	0.943	0.863	0.925	0.903	0.877	0.908	0.948	0.918
	30.67	0.95	0.89	0.975	1.018	0.944	0.984	0.964	0.955	0.889	0.954	0.906	0.937	0.965	0.847	0.908	0.918	0.886	0.915	0.897	0.911
	30.75	0.958	0.903	0.977	1.018	0.948	0.979	0.95	0.939	0.9	0.915	0.91	0.939	0.971	0.848	0.917	0.905	0.889	0.913	0.922	0.905
	30.83	0.958	0.891	0.967	1.021	0.956	0.988	0.947	0.94	0.891	0.918	0.909	0.93	0.974	0.855	0.902	0.9	0.911	0.919	0.935	0.867
	30.92	0.977	0.893	0.962	1.002	0.938	0.962	0.938	0.953	0.89	0.92	0.908	0.942	0.98	0.863	0.899	0.902	0.87	0.912	0.926	0.867
	31	0.966	0.874	0.981	1.003	0.944	0.971	0.918	0.972	0.901	0.925	0.905	0.917	0.964	0.893	0.909	0.9	0.865	0.896	0.927	0.879
	31.08	0.981	0.905	0.982	0.999	0.935	0.984	0.926	0.959	0.879	0.938	0.905	0.915	0.943	0.884	0.908	0.923	0.878	0.897	0.921	0.887
	31.17	0.965	0.908	0.976	1.003	0.934	0.973	0.932	0.96	0.875	0.935	0.909	0.929	0.933	0.866	0.907	0.944	0.894	0.895	0.921	0.917
	31.25	0.96	0.912	0.965	1.021	0.936	0.953	0.932	0.918	0.877	0.92	0.907	0.93	0.943	0.854	0.907	0.943	0.899	0.882	0.917	0.913
	31.33	0.957	0.918	0.965	1.014	0.924	0.956	0.933	0.937	0.872	0.924	0.907	0.927	0.979	0.875	0.91	0.952	0.905	0.876	0.917	0.902
	31.42	0.954	0.917	0.965	1.019	0.937	0.954	0.932	0.93	0.868	0.9	0.918	0.928	0.939	0.876	0.889	0.932	0.9	0.903	0.91	0.898
	31.5	0.946	0.919	0.96	1.028	0.936	0.96	0.934	0.928	0.857	0.929	0.919	0.928	0.961	0.887	0.889	0.946	0.9	0.932	0.922	0.897
	31.58	0.963	0.898	0.949	1.015	0.95	0.964	0.924	0.943	0.854	0.945	0.92	0.933	0.972	0.902	0.899	0.95	0.883	0.934	0.923	0.909
	31.67	0.963	0.902	0.959	1.028	0.943	0.964	0.932	0.932	0.892	0.938	0.924	0.918	0.96	0.898	0.889	0.958	0.893	0.941	0.911	0.914
	31.75	0.947	0.929	0.96	1.001	0.945	0.977	0.945	0.924	0.891	0.938	0.915	0.923	0.96	0.9	0.896	0.934	0.893	0.944	0.917	0.913
	31.83	0.969	0.923	0.959	1.009	0.951	0.952	0.935	0.938	0.896	0.934	0.945	0.937	0.958	0.867	0.913	0.942	0.905	0.92	0.927	0.902
	31.92	0.972	0.927	0.959	0.99	0.931	0.964	0.96	0.941	0.902	0.935	0.936	0.951	0.964	0.84	0.923	0.941	0.92	0.929	0.932	0.924
	32	0.952	0.927	0.957	1.018	0.957	0.965	0.967	0.916	0.895	0.921	0.931	0.951	0.975	0.881	0.948	0.92	0.921	0.922	0.912	0.915
	32.08	0.957	0.94	0.97	1.021	0.966	0.96	0.961	0.942	0.902	0.934	0.933	0.939	0.974	0.866	0.951	0.934	0.917	0.922	0.929	0.922
	32.17	0.947	0.92	0.966	1.006	0.959	0.94	0.95	0.936	0.901	0.941	0.938	0.938	0.962	0.892	0.939	0.959	0.917	0.917	0.945	0.936
	32.25	0.95	0.932	0.945	0.993	0.935	0.985	0.952	0.928	0.883	0.935	0.927	0.938	0.962	0.9	0.921	0.95	0.931	0.92	0.947	0.928
	32.33	0.956	0.959	0.965	1.017	0.955	0.976	0.937	0.925	0.859	0.934	0.946	0.931	0.984	0.887	0.905	0.954	0.929	0.917	0.941	0.925
	32.42	0.964	0.933	0.959	1.005	0.958	0.959	0.959	0.927	0.875	0.928	0.932	0.924	0.979	0.894	0.911	0.938	0.936	0.934	0.931	0.926
	32.5	0.936	0.939	0.958	1.009	0.951	0.983	0.961	0.928	0.878	0.916	0.972	0.923	0.974	0.873	0.898	0.94	0.92	0.941	0.92	0.914
	32.58	0.951	0.926	0.94	1.009	0.944	0.967	0.964	0.923	0.86	0.906	0.958	0.916	0.967	0.865	0.911	0.935	0.909	0.928	0.92	0.912
	32.67	0.949	0.933	0.944	1.003	0.958	0.967	0.957	0.907	0.873	0.907	0.939	0.934	0.969	0.868	0.888	0.951	0.931	0.935	0.942	0.921
	32.75	0.953	0.943	0.952	0.989	0.957	0.99	0.973	0.918	0.869	0.914	0.952	0.925	0.959	0.878	0.886	0.955	0.91	0.933	0.931	0.936
	32.83	0.961	0.943	0.948	0.999	0.97	0.955	0.953	0.93	0.86	0.919	0.948	0.926	0.953	0.865	0.854	0.956	0.917	0.919	0.94	0.932
	32.92	0.961	0.969	0.939	1.007	0.971	0.959	0.953	0.922	0.874	0.924	0.949	0.955	0.956	0.864	0.889	0.956	0.915	0.923	0.936	0.921
	33	0.953	0.974	0.934	1.008	0.972	0.966	0.973	0.912	0.871	0.929	0.941	0.966	0.955	0.89	0.9	0.962	0.911	0.923	0.91	0.929
	33.08	0.962	0.96	0.93	0.975	0.984	0.985	0.98	0.874	0.867	0.92	0.961	0.948	0.962	0.882	0.894	0.955	0.921	0.92	0.931	0.925
	33.17	0.965	0.96	0.929	0.967	0.975	0.981	0.99	0.971	0.859	0.914	0.944	0.95	0.961	0.894	0.885	0.95	0.93	0.932	0.934	0.934
	33.25	0.955	0.94	0.912	0.963	0.947	0.974	0.998	0.951	0.887	0.918	0.947	0.952	0.958	0.926	0.903	0.953	0.941	0.938	0.941	0.946
	33.33	0.943	0.953	0.921	0.985	0.969	0.966	0.989	0.94	0.872	0.919	0.949	0.945	0.965	0.912	0.912	0.945	0.933	0.949	0.943	0.956
	33.42	0.952	0.951	0.942	0.995	0.976	0.974	0.984	0.928	0.89	0.921	0.966	0.937	0.966	0.909	0.906	0.966	0.928	0.948	0.934	0.958
	33.5	0.937	0.963	0.938	0.999	0.977	0.943	0.969	0.923	0.887	0.92	0.962	0.942	0.955	0.918	0.926	0.964	0.915	0.93	0.947	0.948
	33.58	0.969	0.959	0.94	1.002	0.962	0.979	0.977	0.93	0.921	0.916	0.966	0.951	0.959	0.899	0.94	0.969	0.916	0.941	0.944	0.941
	33.67	0.944	0.937	0.942	0.997	0.959	0.981	0.973	0.924	0.911	0.913	0.969	0.943	0.967	0.886	0.922	0.979	0.928	0.934	0.935	0.925
	33.75	0.952	0.944	0.951	0.988	0.969	0.965	0.964	0.949	0.902	0.908	0.966	0.938	0.954	0.874	0.925	0.97	0.923	0.919	0.941	0.926
	33.83	0.937	0.947	0.957	0.995	0.965	0.952	0.973	0.944	0.893	0.899	0.972	0.937	0.976	0.872	0.912	0.967	0.935	0.926	0.94	0.925
	33.92	0.953	0.964	0.95	1	0.963	0.974	0.996	0.94	0.892	0.905	0.945	0.943	0.974	0.887	0.919	0.961	0.962	0.932	0.941	0.937
	34	0.929	0.948	0.951	1.005	0.974	0.975	0.992	0.938	0.889	0.912	0.97	0.949	0.964	0.899	0.917	0.944	0.95	0.929	0.931	0.941
	34.08	0.956	0.964	0.957	1.009	0.969	0.988	0.992	0.936	0.9	0.924	0.965	0.935	0.976	0.906	0.916	0.947	0.92	0.919	0.925	0.93
	34.17	0.935	0.942	0.964	0.986	0.964	0.971	0.981	0.935	0.909	0.932	0.955	0.953	0.967	0.897	0.916	0.952	0.951	0.932	0.933	0.933
	34.25	0.937	0.977	0.962	0.999	0.967	0.979	0.977	0.939	0.897	0.934	0.967	0.96	0.966	0.891	0.928	0.946	0.924	0.929	0.926	0.934
	34.33	0.927	0.972	0.96	1.008	0.992	0.97	0.961	0.925	0.885	0.938	0.96	0.955	0.971	0.867	0.916	0.947	0.937	0.913	0.942	0.935
	34.42	0.932	0.957	0.939	0.994	0.976	0.992	0.97	0.922	0.877	0.935	0.96	0.941	0.973	0.866	0.916	0.972	0.937	0.95	0.945	0.938
	34.5	0.912	0.966	0.941	0.989	0.973	0.974	0.962	0.924	0.879	0.925	0.948	0.945	0.967	0.879	0.901	0.952	0.937	0.936	0.943	0.934
	34.58	0.919	0.962	0.951	1.011	0.978	0.968	1	0.919	0.886	0.916	0.938	0.942	0.972	0.891	0.915	0.955	0.94	0.943	0.936	0.932
	34.67	0.92	0.952	0.975	1.011	0.975	0.965	0.975	0.922	0.906	0.916	0.949	0.946	0.963	0.891	0.917	0.974	0.952	0.953	0.93	0.925
	34.75	0.936	0.946	0.963	1.008	0.968	0.978	0.997	0.928	0.887	0.908	0.946	0.934	0.964	0.899	0.925	0.964	0.958	0.963	0.93	0.927
	34.83	0.956	0.941	0.951	0.996	0.962	0.964	0.99	0.939	0.88	0.905	0.951	0.953	0.959	0.886	0.897	0.95	0.94	0.961	0.929	0.926
	34.92	0.946	0.935	0.944	0.998	0.964	0.962	0.997	0.932	0.896	0.912	0.956	0.956	0.956	0.883	0.91	0.952	0.92	0.959	0.927	0.931
	35	0.944	0.945	0.975	1.013	0.98	0.974	0.996	0.946	0.886	0.914	0.961	0.96	0.97	0.879	0.905	0.958	0.927	0.944	0.921	0.927
	35.08	0.944	0.942	0.94	1.006	0.98	0.987	1.008	0.936	0.886	0.909	0.961	0.94	0.962	0.883	0.912	0.96	0.931	0.965	0.936	0.93
	35.17	0.931	0.926	0.953	0.999	0.984	0.957	1.006	0.928	0.859	0.911	0.946	0.941	0.957	0.876	0.902	0.962	0.934	0.963	0.918	0.928
	35.25	0.919	0.937	0.97	0.997	0.977	0.958	0.999	0.91	0.859	0.929	0.941	0.929	0.953	0.87	0.884	0.968	0.908	0.953	0.916	0.913
	35.33	0.909	0.941	0.964	0.996	0.984	0.96	0.978	0.896	0.884	0.935	0.971	0.937	0.985	0.873	0.895	0.978	0.959	0.944	0.914	0.944
	35.42	0.916	0.954	0.952	0.997	0.988	0.969	1	0.898	0.898	0.939	0.964	0.948	1.003	0.876	0.893	0.97	0.923	0.944	0.929	0.948
	35.5	0.921	0.937	0.944	0.993	0.987	0.98	1.012	0.908	0.908	0.937	0.97	0.934	0.976	0.886	0.891	0.96	0.888	0.946	0.929	0.931
	35.58	0.931	0.963	0.943	0.997	0.97	1.016	0.995	0.932	0.894	0.935	0.966	0.925	0.98	0.887	0.913	0.948	0.952	0.953	0.922	0.95
	35.67	0.928	0.948	0.947	0.99	0.973	1.008	0.986	0.921	0.893	0.925	0.96	0.919	0.959	0.892	0.902	0.946	0.945	0.936	0.891	0.915
	35.75	0.922	0.96	0.944	1.003	0.978	1.006	0.99	0.913	0.909	0.926	0.946	0.917	0.973	0.884	0.9	0.965	0.962	0.948	0.945	0.95
	35.83	0.928	0.951	0.944	0.999	0.971	0.969	0.979	0.91	0.898	0.919	0.946	0.942	0.977	0.868	0.906	0.958	0.919	0.927	0.942	0.933
	35.92	0.944	0.957	0.931	1.001	0.976	1.011	0.962	0.913	0.884	0.913	0.945	0.948	0.978	0.863	0.909	0.953	0.92	0.932	0.939	0.954
	36	0.945	0.961	0.935	1.002	0.977	1.01	0.98	0.935	0.89	0.924	0.955	0.956	0.974	0.87	0.907	0.927	0.92	0.931	0.938	0.963
	36.08	0.955	0.932	0.933	0.996	0.954	1.012	0.964	0.898	0.894	0.927	0.948	0.936	0.973	0.875	0.899	0.922	0.93	0.929	0.935	0.959
	36.17	0.954	0.936	0.926	1.008	0.966	0.986	0.987	0.889	0.882	0.93	0.92	0.94	0.977	0.893	0.895	0.917	0.918	0.923	0.949	0.939
	36.25	0.943	0.945	0.912	1.012	0.945	0.969	0.951	0.915	0.891	0.933	0.94	0.941	0.973	0.893	0.899	0.912	0.923	0.925	0.941	0.932
	36.33	0.938	0.947	0.912	1.003	0.98	0.975	0.941	0.909	0.894	0.932	0.952	0.941	0.983	0.891	0.895	0.902	0.931	0.915	0.924	0.97
	36.42	0.952	0.932	0.901	0.994	0.982	0.969	0.947	0.889	0.872	0.922	0.947	0.929	0.982	0.891	0.89	0.893	0.94	0.925	0.94	0.977
	36.5	0.948	0.941	0.898	0.996	0.991	0.964	0.948	0.922	0.872	0.926	0.95	0.941	0.987	0.887	0.886	0.953	0.932	0.917	0.933	0.979
	36.58	0.944	0.946	0.905	0.986	0.988	0.968	0.975	0.92	0.882	0.922	0.931	0.934	0.973	0.871	0.882	0.964	0.91	0.912	0.931	0.964
	36.67	0.952	0.935	0.901	0.991	0.986	0.978	0.972	0.894	0.876	0.913	0.933	0.947	0.982	0.865	0.869	0.911	0.95	0.917	0.933	0.97
	36.75	0.943	0.975	0.894	0.992	0.995	1.032	0.975	0.894	0.858	0.915	0.983	0.928	0.983	0.867	0.859	0.936	0.941	0.936	0.923	0.966
	36.83	0.934	0.932	0.896	0.988	0.988	0.998	0.975	0.893	0.851	0.923	0.969	0.909	0.997	0.865	0.91	0.932	0.925	0.926	0.933	0.957
	36.92	0.935	0.937	0.877	1.009	1.002	1.005	0.964	0.881	0.857	0.93	0.951	0.919	0.983	0.862	0.918	0.928	0.952	0.925	0.947	0.941
	37	0.933	0.928	0.89	1.009	0.993	1.012	0.97	0.866	0.893	0.927	0.967	0.943	0.984	0.869	0.899	0.93	0.95	0.911	0.936	0.948
	37.08	0.921	0.94	0.918	1.003	0.988	0.984	0.959	0.874	0.893	0.914	0.953	0.926	0.984	0.869	0.898	0.933	0.945	0.925	0.924	0.943
	37.17	0.91	0.929	0.907	0.989	0.99	0.978	0.964	0.841	0.876	0.922	0.95	0.927	0.974	0.868	0.902	0.921	0.952	0.922	0.934	0.923
	37.25	0.911	0.945	0.894	0.97	0.973	0.975	0.959	0.864	0.884	0.917	0.961	0.934	0.979	0.876	0.898	0.901	0.948	0.935	0.939	0.92
	37.33	0.897	0.953	0.905	0.989	0.955	0.982	0.952	0.862	0.87	0.914	0.959	0.92	0.967	0.895	0.89	0.905	0.944	0.938	0.945	0.918
	37.42	0.899	0.946	0.916	0.983	0.976	0.982	0.96	0.846	0.872	0.898	0.955	0.905	0.966	0.892	0.884	0.883	0.925	0.929	0.941	0.909
	37.5	0.894	0.931	0.91	0.979	0.98	0.971	0.953	0.857	0.885	0.897	0.947	0.903	0.975	0.887	0.875	0.914	0.948	0.892	0.924	0.902
	37.58	0.907	0.954	0.906	1.003	0.979	0.978	0.939	0.862	0.892	0.915	0.946	0.897	0.971	0.876	0.856	0.927	0.944	0.906	0.916	0.921
	37.67	0.913	0.963	0.891	1.001	0.978	0.978	0.93	0.827	0.898	0.917	0.933	0.892	0.956	0.862	0.888	0.914	0.929	0.888	0.925	0.938
	37.75	0.922	0.962	0.889	1.007	0.98	0.965	0.922	0.846	0.9	0.921	0.965	0.876	0.969	0.862	0.88	0.902	0.925	0.887	0.943	0.925
	37.83	0.944	0.944	0.893	0.999	0.969	0.948	0.92	0.823	0.887	0.931	0.964	0.919	0.983	0.855	0.904	0.915	0.95	0.873	0.917	0.924
	37.92	0.925	0.965	0.886	0.985	0.953	0.96	0.955	0.846	0.897	0.939	0.961	0.926	0.971	0.856	0.899	0.899	0.926	0.886	0.917	0.914
	38	0.906	0.975	0.874	1	0.968	0.957	0.946	0.827	0.891	0.938	0.964	0.935	0.968	0.859	0.898	0.883	0.93	0.905	0.908	0.914
	38.08	0.926	0.971	0.867	0.999	0.959	0.988	0.948	0.831	0.883	0.93	0.963	0.917	0.969	0.867	0.917	0.91	0.895	0.905	0.94	0.913
	38.17	0.94	0.953	0.852	0.98	0.949	0.961	0.946	0.845	0.883	0.933	0.951	0.92	0.974	0.861	0.913	0.946	0.907	0.921	0.919	0.95
	38.25	0.95	0.945	0.824	0.981	0.948	0.971	0.955	0.832	0.89	0.939	0.939	0.919	0.962	0.881	0.919	0.971	0.863	0.915	0.918	0.951
	38.33	0.938	0.942	0.85	0.979	0.951	0.967	0.94	0.824	0.885	0.929	0.941	0.913	0.945	0.877	0.885	0.938	0.864	0.911	0.906	0.957
	38.42	0.944	0.938	0.857	0.954	0.97	0.963	0.965	0.797	0.879	0.957	0.932	0.906	0.967	0.875	0.902	0.946	0.857	0.918	0.902	0.954
	38.5	0.925	0.938	0.86	0.957	0.978	0.981	0.964	0.82	0.863	0.97	0.936	0.912	0.989	0.885	0.886	0.943	0.891	0.913	0.911	0.931
	38.58	0.945	0.909	0.839	0.952	0.952	0.971	0.978	0.803	0.891	0.954	0.926	0.914	0.976	0.886	0.867	0.949	0.887	0.916	0.949	0.933
	38.67	0.936	0.936	0.843	0.966	0.973	0.974	0.968	0.797	0.874	0.949	0.932	0.894	0.985	0.896	0.907	0.906	0.942	0.92	0.933	0.925
	38.75	0.938	0.943	0.845	0.948	0.962	0.986	0.954	0.811	0.908	0.946	0.933	0.894	0.986	0.898	0.922	0.909	0.935	0.907	0.926	0.96
	38.83	0.934	0.944	0.843	0.951	0.954	0.963	0.94	0.799	0.893	0.935	0.906	0.917	0.963	0.893	0.926	0.903	0.947	0.9	0.919	0.919
	38.92	0.934	0.954	0.846	0.954	0.957	0.984	0.975	0.811	0.89	0.953	0.9	0.899	0.964	0.878	0.96	0.89	0.929	0.911	0.924	0.929
	39	0.937	0.945	0.843	0.96	0.976	0.98	0.977	0.82	0.91	0.951	0.936	0.888	0.975	0.871	0.915	0.949	0.946	0.893	0.912	0.914
	39.08	0.929	0.941	0.83	0.976	0.987	0.988	0.974	0.85	0.908	0.942	0.93	0.871	0.982	0.872	0.907	0.912	0.931	0.925	0.939	0.942
	39.17	0.949	0.934	0.83	0.975	0.969	0.978	0.974	0.85	0.902	0.925	0.939	0.914	0.993	0.921	0.923	0.887	0.885	0.931	0.926	0.88
	39.25	0.933	0.956	0.796	0.98	0.946	0.97	0.927	0.858	0.875	0.942	0.945	0.92	0.981	0.925	0.893	0.903	0.896	0.93	0.93	0.929
	39.33	0.926	0.939	0.807	0.991	0.947	0.97	0.939	0.857	0.893	0.939	0.916	0.92	0.942	0.918	0.915	0.902	0.914	0.921	0.929	0.92
	39.42	0.938	0.925	0.839	1.001	0.967	1.012	0.962	0.85	0.89	0.916	0.924	0.904	0.977	0.913	0.932	0.915	0.891	0.917	0.928	0.928
	39.5	0.955	0.929	0.84	0.974	0.942	0.967	0.974	0.844	0.896	0.94	0.931	0.93	0.976	0.896	0.93	0.925	0.895	0.915	0.921	0.902
	39.58	0.933	0.936	0.817	0.973	0.967	0.979	0.988	0.828	0.907	0.935	0.922	0.909	0.97	0.888	0.949	0.913	0.875	0.921	0.925	0.922
	39.67	0.931	0.937	0.84	0.979	0.963	0.987	0.979	0.828	0.922	0.947	0.964	0.9	0.968	0.877	0.946	0.923	0.894	0.9	0.908	0.937
	39.75	0.961	0.932	0.865	0.985	0.955	0.982	0.972	0.838	0.951	0.942	0.934	0.878	0.967	0.885	0.933	0.912	0.879	0.898	0.909	0.93
	39.83	0.95	0.937	0.867	0.97	0.941	0.983	0.967	0.83	0.938	0.948	0.971	0.871	0.956	0.872	0.915	0.929	0.908	0.913	0.912	0.94
	39.92	0.929	0.922	0.876	0.977	0.985	0.989	0.986	0.828	0.934	0.949	0.969	0.88	0.947	0.885	0.897	0.904	0.916	0.907	0.912	0.934
	40	0.937	0.902	0.874	0.971	0.933	0.981	0.974	0.822	0.915	0.948	0.954	0.884	0.941	0.87	0.905	0.926	0.922	0.906	0.931	0.947
	40.08	0.934	0.947	0.885	0.981	0.973	0.968	0.968	0.825	0.922	0.98	0.951	0.891	0.962	0.874	0.905	0.92	0.9	0.902	0.916	0.944
	40.17	0.927	0.94	0.881	0.96	0.971	0.993	0.973	0.815	0.908	0.948	0.928	0.884	0.962	0.891	0.901	0.926	0.912	0.896	0.913	0.954
	40.25	0.929	0.941	0.884	0.957	0.975	1.008	0.994	0.826	0.921	0.948	0.92	0.869	0.964	0.905	0.913	0.922	0.921	0.888	0.916	0.933
	40.33	0.912	0.952	0.889	0.971	0.978	0.994	0.967	0.831	0.904	0.952	0.959	0.857	0.95	0.903	0.92	0.938	0.924	0.89	0.916	0.929
	40.42	0.935	0.916	0.885	0.964	0.974	0.99	0.966	0.839	0.899	0.937	0.941	0.857	0.951	0.904	0.929	0.946	0.918	0.908	0.906	0.929
	40.5	0.941	0.932	0.888	0.941	0.975	0.996	0.974	0.843	0.886	0.933	0.953	0.896	0.965	0.916	0.932	0.93	0.935	0.925	0.907	0.895
	40.58	0.941	0.921	0.903	0.926	0.957	0.978	0.99	0.846	0.891	0.953	0.949	0.883	0.96	0.911	0.888	0.919	0.927	0.923	0.903	0.923
	40.67	0.945	0.948	0.925	0.949	0.957	0.974	0.984	0.875	0.913	0.946	0.943	0.89	0.941	0.905	0.922	0.915	0.913	0.914	0.906	0.919
	40.75	0.945	0.953	0.919	0.942	0.988	0.986	0.97	0.833	0.883	0.943	0.943	0.874	0.947	0.9	0.899	0.924	0.911	0.916	0.92	0.925
	40.83	0.949	0.938	0.919	0.948	0.987	0.966	0.967	0.832	0.877	0.95	0.945	0.878	0.959	0.876	0.92	0.939	0.885	0.904	0.919	0.916
	40.92	0.927	0.929	0.918	0.956	0.957	0.952	0.971	0.83	0.889	0.971	0.937	0.862	0.956	0.883	0.917	0.946	0.88	0.896	0.907	0.915
	41	0.938	0.941	0.931	0.953	0.976	0.953	0.979	0.836	0.898	0.975	0.93	0.882	0.939	0.873	0.931	0.962	0.877	0.925	0.897	0.916
	41.08	0.911	0.944	0.934	0.963	0.974	0.973	0.993	0.841	0.909	0.968	0.92	0.866	0.952	0.875	0.929	0.95	0.88	0.923	0.895	0.917
	41.17	0.889	0.944	0.936	0.968	0.965	0.973	0.992	0.871	0.925	0.96	0.917	0.884	0.963	0.879	0.93	0.941	0.872	0.909	0.931	0.941
	41.25	0.913	0.971	0.916	0.961	0.953	0.978	1.02	0.878	0.907	0.945	0.929	0.88	0.963	0.875	0.935	0.939	0.882	0.918	0.915	0.933
	41.33	0.941	0.969	0.913	0.97	0.96	0.968	0.972	0.863	0.911	0.954	0.936	0.879	0.938	0.876	0.921	0.96	0.887	0.901	0.924	0.921
	41.42	0.933	0.974	0.933	0.983	0.949	0.957	0.988	0.873	0.895	0.953	0.94	0.874	0.949	0.869	0.912	0.932	0.932	0.911	0.918	0.933
	41.5	0.946	0.963	0.929	0.969	0.951	0.901	0.987	0.852	0.88	0.958	0.944	0.891	0.951	0.88	0.903	0.922	0.907	0.897	0.932	0.956
	41.58	0.954	0.96	0.915	0.978	0.961	0.941	0.98	0.856	0.908	0.951	0.951	0.898	0.947	0.9	0.962	0.912	0.928	0.905	0.93	0.924
	41.67	0.93	0.967	0.925	0.984	0.981	0.965	0.976	0.857	0.888	0.962	0.93	0.888	0.93	0.888	0.953	0.92	0.923	0.899	0.923	0.941
	41.75	0.9	0.956	0.91	0.978	0.956	1.018	0.976	0.848	0.883	0.977	0.947	0.879	0.958	0.899	0.952	0.913	0.908	0.9	0.914	0.942
	41.83	0.928	0.941	0.897	0.974	0.963	0.98	0.97	0.854	0.911	0.971	0.908	0.881	0.924	0.927	0.922	0.93	0.965	0.911	0.913	0.941
	41.92	0.943	0.959	0.881	0.97	0.963	0.983	0.98	0.839	0.921	0.965	0.896	0.876	0.932	0.915	0.978	0.913	0.938	0.909	0.912	0.934
	42	0.93	0.965	0.912	0.968	0.982	0.975	0.949	0.822	0.917	0.961	0.929	0.863	0.924	0.913	0.953	0.961	0.961	0.895	0.895	0.918
	42.08	0.947	0.979	0.942	0.964	0.952	0.997	0.969	0.844	0.908	0.967	0.934	0.855	0.937	0.928	0.959	0.939	0.944	0.928	0.905	0.929
	42.17	0.944	0.962	0.942	0.953	0.954	0.986	0.97	0.867	0.907	0.954	0.93	0.856	0.947	0.925	0.941	0.955	0.95	0.932	0.913	0.924
	42.25	0.949	0.978	0.921	0.949	0.949	0.982	0.972	0.847	0.892	0.952	0.927	0.87	0.915	0.909	0.937	0.911	0.957	0.928	0.897	0.932
	42.33	0.944	0.984	0.958	0.939	0.928	0.965	0.963	0.819	0.901	0.949	0.931	0.876	0.959	0.892	0.91	0.887	0.96	0.9	0.9	0.913
	42.42	0.902	0.984	0.93	0.899	0.944	0.976	0.959	0.847	0.907	0.937	0.928	0.856	0.926	0.889	0.915	0.881	0.969	0.89	0.908	0.906
	42.5	0.91	0.967	0.946	0.944	0.939	0.949	0.974	0.841	0.906	0.944	0.92	0.857	0.931	0.86	0.886	0.894	0.942	0.887	0.9	0.902
	42.58	0.939	0.965	0.942	0.961	0.961	0.973	0.965	0.866	0.895	0.923	0.932	0.871	0.928	0.87	0.888	0.898	0.95	0.88	0.898	0.889
	42.67	0.915	0.962	0.949	0.941	0.936	0.962	0.951	0.848	0.89	0.922	0.924	0.893	0.946	0.895	0.876	0.937	0.936	0.866	0.885	0.886
	42.75	0.928	0.946	0.943	0.939	0.955	0.966	0.97	0.862	0.88	0.935	0.938	0.866	0.955	0.892	0.869	0.934	0.932	0.87	0.881	0.878
	42.83	0.932	0.963	0.935	0.951	0.971	0.956	0.966	0.867	0.862	0.941	0.922	0.889	0.931	0.862	0.88	0.883	0.913	0.864	0.88	0.882
	42.92	0.949	0.96	0.957	0.934	0.977	0.939	0.969	0.881	0.893	0.935	0.916	0.898	0.927	0.853	0.875	0.887	0.887	0.859	0.895	0.879
	43	0.949	0.939	0.918	0.935	0.978	0.941	0.951	0.869	0.873	0.946	0.899	0.926	0.899	0.858	0.889	0.891	0.901	0.859	0.866	0.878
	43.08	0.915	0.938	0.935	0.923	0.967	0.947	0.94	0.862	0.873	0.923	0.904	0.895	0.903	0.852	0.877	0.854	0.883	0.866	0.866	0.883
	43.17	0.922	0.931	0.942	0.957	0.965	0.956	0.949	0.84	0.869	0.925	0.907	0.891	0.911	0.841	0.835	0.835	0.961	0.87	0.881	0.883
	43.25	0.926	0.97	0.927	0.94	0.966	0.974	0.965	0.862	0.856	0.932	0.919	0.886	0.91	0.865	0.848	0.833	0.903	0.873	0.882	0.871
	43.33	0.914	0.951	0.966	0.94	0.967	0.952	0.914	0.864	0.864	0.931	0.909	0.869	0.896	0.868	0.86	0.84	0.904	0.867	0.869	0.866
	43.42	0.946	0.909	0.971	0.929	0.962	0.956	0.947	0.853	0.874	0.932	0.914	0.861	0.95	0.876	0.869	0.842	0.895	0.843	0.869	0.868
	43.5	0.942	0.926	0.984	0.901	0.97	0.97	0.943	0.859	0.857	0.92	0.893	0.873	0.914	0.881	0.857	0.824	0.891	0.848	0.869	0.882
	43.58	0.942	0.964	0.952	0.9	0.982	0.993	0.945	0.847	0.901	0.933	0.888	0.841	0.935	0.883	0.886	0.84	0.954	0.857	0.874	0.856
	43.67	0.926	0.966	0.957	0.9	0.955	0.995	0.929	0.839	0.909	0.927	0.935	0.877	0.93	0.892	0.906	0.837	0.942	0.877	0.864	0.86
	43.75	0.919	0.953	0.984	0.884	0.96	0.982	0.929	0.851	0.881	0.96	0.943	0.868	0.938	0.886	0.898	0.856	0.93	0.847	0.874	0.857
	43.83	0.899	0.933	0.985	0.889	0.964	0.972	0.938	0.871	0.869	0.948	0.911	0.856	0.958	0.871	0.893	0.846	0.969	0.889	0.879	0.853
	43.92	0.906	0.939	0.981	0.895	0.957	0.985	0.933	0.874	0.892	0.926	0.916	0.855	0.955	0.873	0.896	0.836	0.94	0.876	0.879	0.847
	44	0.904	0.938	0.97	0.898	0.972	0.986	0.909	0.862	0.898	0.927	0.942	0.853	0.918	0.851	0.872	0.827	0.938	0.855	0.894	0.857
	44.08	0.942	0.945	0.944	0.869	0.977	0.985	0.92	0.822	0.929	0.931	0.952	0.813	0.935	0.874	0.889	0.862	0.92	0.851	0.879	0.852
	44.17	0.924	0.934	0.943	0.861	0.983	0.988	0.917	0.848	0.933	0.941	0.949	0.845	0.887	0.889	0.882	0.843	0.91	0.923	0.844	0.838
	44.25	0.914	0.934	0.939	0.869	0.958	0.989	0.907	0.842	0.88	0.928	0.935	0.856	0.887	0.879	0.89	0.847	0.927	0.901	0.838	0.891
	44.33	0.917	0.995	0.955	0.871	0.956	0.983	0.894	0.836	0.884	0.928	0.938	0.864	0.924	0.891	0.892	0.825	0.949	0.865	0.831	0.872
	44.42	0.931	0.968	0.99	0.864	0.967	1.005	0.925	0.84	0.885	0.983	0.911	0.821	0.898	0.887	0.913	0.832	0.939	0.887	0.854	0.872
	44.5	0.919	0.963	0.98	0.893	0.961	0.999	0.919	0.859	0.891	0.982	0.904	0.858	0.847	0.861	0.881	0.843	0.916	0.852	0.855	0.867
	44.58	0.918	0.963	0.992	0.875	0.954	0.992	0.931	0.89	0.882	0.968	0.917	0.863	0.928	0.864	0.886	0.831	0.939	0.842	0.849	0.876
	44.67	0.912	0.955	0.995	0.859	0.974	0.981	0.924	0.868	0.93	0.967	0.95	0.85	0.957	0.87	0.898	0.855	0.954	0.857	0.872	0.874
	44.75	0.916	0.951	0.972	0.851	0.972	1.006	0.955	0.873	0.933	0.952	0.958	0.866	0.909	0.873	0.894	0.834	0.949	0.884	0.87	0.881
	44.83	0.93	0.929	0.975	0.872	0.981	0.964	0.957	0.862	0.931	0.934	0.956	0.875	0.891	0.869	0.896	0.807	0.956	0.885	0.884	0.877
	44.92	0.943	0.937	0.972	0.884	0.981	0.965	0.925	0.888	0.908	0.923	0.923	0.854	0.896	0.851	0.909	0.777	0.919	0.89	0.88	0.876
	45	0.942	0.926	0.963	0.881	0.971	0.976	0.928	0.88	0.931	0.928	0.911	0.832	0.883	0.862	0.881	0.762	0.933	0.853	0.87	0.885
	45.08	0.93	0.949	0.966	0.888	0.957	0.982	0.937	0.881	0.891	0.907	0.929	0.833	0.895	0.863	0.883	0.784	0.927	0.881	0.873	0.891
	45.17	0.914	0.93	0.958	0.877	0.968	0.983	0.935	0.876	0.9	0.908	0.928	0.824	0.898	0.871	0.869	0.81	0.917	0.915	0.874	0.915
	45.25	0.89	0.932	0.935	0.872	0.972	0.999	0.914	0.871	0.902	0.895	0.924	0.805	0.907	0.877	0.896	0.824	0.919	0.889	0.869	0.907
	45.33	0.879	0.949	0.966	0.864	0.941	0.992	0.902	0.859	0.884	0.894	0.946	0.777	0.892	0.871	0.865	0.815	0.928	0.889	0.87	0.925
	45.42	0.863	0.923	0.975	0.84	0.971	1.008	0.892	0.882	0.868	0.91	0.95	0.784	0.883	0.874	0.866	0.83	0.921	0.85	0.883	0.939
	45.5	0.868	0.909	0.971	0.833	0.99	0.995	0.883	0.873	0.855	0.939	0.953	0.791	0.875	0.868	0.84	0.824	0.945	0.874	0.861	0.91
	45.58	0.869	1.003	0.964	0.88	0.982	1.009	0.902	0.86	0.859	0.914	0.933	0.805	0.869	0.87	0.866	0.828	0.937	0.868	0.864	0.904
	45.67	0.869	0.959	0.953	0.89	0.977	1.018	0.914	0.861	0.877	0.907	0.949	0.844	0.846	0.856	0.902	0.853	0.944	0.882	0.853	0.897
	45.75	0.857	0.974	0.971	0.857	0.958	1.017	0.925	0.872	0.854	0.896	0.97	0.825	0.853	0.861	0.868	0.849	0.925	0.891	0.874	0.905
	45.83	0.865	0.927	0.972	0.848	0.958	1.016	0.93	0.892	0.862	0.928	0.967	0.846	0.867	0.845	0.854	0.872	0.926	0.893	0.879	0.89
	45.92	0.884	0.938	0.978	0.859	0.949	1.013	0.957	0.866	0.874	0.923	0.94	0.834	0.843	0.867	0.848	0.863	0.941	0.875	0.87	0.895
	46	0.863	0.926	0.963	0.856	0.943	1.025	0.925	0.844	0.889	0.911	0.945	0.817	0.862	0.879	0.856	0.879	0.971	0.865	0.864	0.883
	46.08	0.896	0.935	0.959	0.866	0.938	1.022	0.909	0.865	0.876	0.883	0.936	0.796	0.889	0.871	0.862	0.892	0.952	0.883	0.876	0.884
	46.17	0.879	0.92	0.958	0.84	0.927	1.017	0.903	0.861	0.862	0.911	0.964	0.794	0.892	0.856	0.852	0.848	0.954	0.867	0.876	0.905
	46.25	0.904	0.907	0.94	0.868	0.94	1.001	0.89	0.858	0.876	0.909	0.951	0.785	0.893	0.877	0.825	0.902	0.939	0.855	0.875	0.896
	46.33	0.916	0.924	0.925	0.857	0.941	1.002	0.878	0.855	0.867	0.914	0.963	0.81	0.872	0.887	0.825	0.888	0.939	0.859	0.865	0.9
	46.42	0.871	0.941	0.937	0.854	0.958	0.994	0.884	0.865	0.882	0.918	0.9	0.792	0.89	0.899	0.822	0.886	0.94	0.858	0.858	0.902
	46.5	0.853	0.95	0.943	0.845	0.958	0.984	0.888	0.864	0.871	0.922	0.886	0.821	0.888	0.901	0.829	0.89	0.939	0.869	0.855	0.931
	46.58	0.863	0.934	0.935	0.864	0.958	0.983	0.874	0.904	0.919	0.937	0.887	0.802	0.914	0.883	0.848	0.883	0.952	0.864	0.869	0.935
	46.67	0.853	0.915	0.961	0.866	0.952	0.992	0.869	0.887	0.88	0.927	0.903	0.783	0.895	0.895	0.846	0.861	0.937	0.828	0.872	0.92
	46.75	0.864	0.914	0.956	0.884	0.944	0.977	0.853	0.89	0.882	0.93	0.913	0.769	0.897	0.896	0.85	0.866	0.94	0.837	0.868	0.913
	46.83	0.86	0.876	0.951	0.875	0.954	1.003	0.861	0.861	0.881	0.935	0.93	0.804	0.871	0.87	0.893	0.861	0.936	0.846	0.869	0.872
	46.92	0.876	0.936	0.95	0.845	0.925	1.002	0.877	0.859	0.902	0.94	0.934	0.822	0.861	0.896	0.885	0.863	0.956	0.842	0.86	0.848
	47	0.873	0.97	0.959	0.841	0.942	0.999	0.873	0.848	0.873	0.948	0.984	0.835	0.859	0.906	0.86	0.846	0.946	0.854	0.847	0.92
	47.08	0.893	0.938	0.978	0.808	0.934	1.013	0.854	0.921	0.875	0.931	0.967	0.81	0.863	0.9	0.858	0.844	0.95	0.877	0.852	0.901
	47.17	0.881	0.921	0.98	0.821	0.961	1.02	0.858	0.899	0.866	0.92	0.959	0.839	0.889	0.881	0.853	0.903	0.965	0.878	0.859	0.881
	47.25	0.87	0.919	0.97	0.832	0.945	1.036	0.861	0.876	0.885	0.971	0.942	0.819	0.88	0.918	0.844	0.882	0.955	0.863	0.86	0.867
	47.33	0.885	0.959	0.96	0.824	0.964	1.023	0.866	0.854	0.889	0.972	0.946	0.826	0.846	0.886	0.828	0.877	0.96	0.895	0.859	0.851
	47.42	0.875	0.944	0.926	0.872	0.959	1.012	0.902	0.833	0.891	0.978	0.939	0.768	0.858	0.875	0.859	0.862	0.938	0.901	0.857	0.853
	47.5	0.881	0.909	0.931	0.871	0.958	0.988	0.885	0.841	0.88	0.944	0.929	0.787	0.867	0.86	0.851	0.898	0.924	0.88	0.836	0.849
	47.58	0.883	0.929	0.949	0.85	0.951	0.995	0.893	0.848	0.899	0.934	0.939	0.807	0.866	0.861	0.847	0.915	0.93	0.876	0.857	0.884
	47.67	0.877	0.919	0.961	0.838	0.938	0.977	0.859	0.847	0.892	0.932	0.94	0.824	0.84	0.87	0.834	0.918	0.97	0.84	0.886	0.879
	47.75	0.861	0.919	0.955	0.826	0.96	0.981	0.872	0.868	0.883	0.926	0.937	0.782	0.82	0.854	0.842	0.901	0.962	0.881	0.88	0.904
	47.83	0.859	0.913	0.96	0.817	0.959	0.979	0.863	0.883	0.866	0.92	0.932	0.835	0.86	0.859	0.84	0.884	0.954	0.885	0.856	0.889
	47.92	0.865	0.933	0.962	0.827	0.942	0.998	0.872	0.855	0.881	0.913	0.907	0.831	0.859	0.894	0.869	0.878	0.939	0.882	0.85	0.878
	48	0.851	0.933	0.96	0.817	0.924	1.011	0.863	0.829	0.884	0.908	0.919	0.826	0.835	0.935	0.84	0.841	0.932	0.88	0.85	0.853
	48.08	0.869	0.939	0.943	0.794	0.918	0.994	0.85	0.823	0.907	0.885	0.934	0.815	0.844	0.923	0.856	0.851	0.935	0.887	0.848	0.846
	48.17	0.879	0.941	0.956	0.794	0.908	0.995	0.854	0.828	0.922	0.892	0.971	0.841	0.88	0.915	0.83	0.812	0.934	0.892	0.853	0.88
	48.25	0.859	0.954	0.959	0.796	0.905	0.989	0.844	0.832	0.918	0.89	0.944	0.83	0.889	0.888	0.829	0.802	0.935	0.887	0.853	0.871
	48.33	0.859	0.956	0.971	0.788	0.923	0.993	0.831	0.823	0.921	0.889	0.95	0.786	0.842	0.896	0.808	0.791	0.953	0.892	0.857	0.875
	48.42	0.873	0.981	0.951	0.805	0.914	0.995	0.846	0.815	0.936	0.891	0.949	0.85	0.835	0.886	0.811	0.834	0.937	0.9	0.865	0.881
	48.5	0.855	0.96	0.953	0.816	0.925	0.967	0.842	0.795	0.931	0.908	0.936	0.811	0.819	0.857	0.803	0.827	0.977	0.893	0.865	0.849
	48.58	0.899	0.98	0.935	0.814	0.931	0.975	0.857	0.832	0.901	0.918	0.919	0.808	0.821	0.834	0.809	0.839	0.936	0.886	0.872	0.899
	48.67	0.881	0.99	0.946	0.808	0.903	0.975	0.859	0.826	0.898	0.912	0.936	0.844	0.813	0.888	0.813	0.865	0.925	0.881	0.854	0.911
	48.75	0.897	0.965	0.943	0.821	0.953	0.97	0.854	0.886	0.91	0.884	0.945	0.817	0.848	0.867	0.813	0.84	0.947	0.906	0.859	0.893
	48.83	0.895	0.96	0.945	0.818	0.946	0.997	0.851	0.848	0.886	0.897	0.946	0.824	0.853	0.868	0.802	0.825	0.968	0.93	0.857	0.888
	48.92	0.906	0.948	0.94	0.86	0.951	0.994	0.847	0.845	0.885	0.894	0.957	0.823	0.848	0.867	0.814	0.831	0.962	0.916	0.855	0.895
	49	0.893	0.933	0.948	0.847	0.909	0.992	0.843	0.84	0.892	0.893	0.947	0.797	0.836	0.883	0.796	0.853	0.953	0.874	0.835	0.909
	49.08	0.893	0.952	0.961	0.822	0.922	0.994	0.842	0.865	0.908	0.902	0.958	0.816	0.821	0.871	0.814	0.856	0.947	0.916	0.842	0.916
	49.17	0.877	0.934	0.971	0.819	0.934	0.966	0.838	0.874	0.884	0.906	0.95	0.814	0.832	0.871	0.792	0.828	0.93	0.939	0.844	0.904
	49.25	0.874	0.944	0.957	0.818	0.924	0.98	0.827	0.876	0.879	0.925	0.947	0.807	0.864	0.891	0.79	0.823	0.918	0.917	0.844	0.901
	49.33	0.889	0.939	0.927	0.815	0.938	0.993	0.819	0.856	0.869	0.92	0.953	0.83	0.767	0.881	0.813	0.855	0.9	0.873	0.858	0.888
	49.42	0.896	0.935	0.933	0.801	0.925	1.008	0.828	0.854	0.873	0.904	0.962	0.848	0.824	0.876	0.81	0.844	0.922	0.891	0.856	0.887
	49.5	0.878	0.926	0.941	0.814	0.937	0.983	0.821	0.849	0.864	0.929	0.949	0.837	0.862	0.866	0.803	0.833	0.89	0.906	0.895	0.885
	49.58	0.891	0.935	0.961	0.793	0.907	0.955	0.837	0.842	0.865	0.943	0.934	0.831	0.867	0.884	0.818	0.833	0.885	0.895	0.892	0.875
	49.67	0.888	0.94	0.942	0.791	0.917	0.968	0.849	0.845	0.883	0.947	0.942	0.847	0.857	0.886	0.823	0.896	0.924	0.893	0.874	0.875
	49.75	0.889	0.942	0.927	0.791	0.913	0.939	0.849	0.86	0.938	0.941	0.967	0.845	0.842	0.877	0.831	0.86	0.919	0.891	0.86	0.881
	49.83	0.904	0.998	0.924	0.781	0.922	0.974	0.85	0.873	0.931	0.922	0.947	0.818	0.842	0.885	0.791	0.903	0.916	0.903	0.858	0.867
	49.92	0.884	1.005	0.912	0.801	0.924	0.967	0.829	0.873	0.898	0.903	0.959	0.831	0.855	0.878	0.797	0.875	0.908	0.903	0.848	0.866
	50	0.871	0.939	0.939	0.805	0.92	0.971	0.85	0.855	0.893	0.902	0.966	0.843	0.856	0.859	0.793	0.815	0.896	0.903	0.844	0.877
	50.08	0.875	0.931	0.955	0.803	0.945	0.997	0.86	0.868	0.884	0.882	0.967	0.837	0.86	0.844	0.812	0.921	0.91	0.921	0.84	0.873
	50.17	0.875	0.906	0.949	0.804	0.935	1.001	0.865	0.868	0.872	0.873	0.959	0.859	0.89	0.847	0.79	0.888	0.937	0.916	0.848	0.932
	50.25	0.853	0.93	0.916	0.821	0.929	1.025	0.854	0.852	0.875	0.876	0.939	0.88	0.851	0.857	0.821	0.841	0.942	0.911	0.85	0.906
	50.33	0.848	0.921	0.916	0.804	0.938	1.016	0.836	0.833	0.875	0.866	0.926	0.868	0.865	0.879	0.801	0.857	0.916	0.91	0.826	0.895
	50.42	0.866	0.92	0.9	0.833	0.957	1.001	0.851	0.836	0.894	0.887	0.927	0.848	0.86	0.869	0.847	0.906	0.916	0.932	0.849	0.904
	50.5	0.884	0.913	0.893	0.829	0.949	0.968	0.848	0.894	0.888	0.868	0.942	0.846	0.829	0.877	0.838	0.912	0.942	0.922	0.837	0.864
	50.58	0.929	0.948	0.872	0.831	0.939	0.966	0.843	0.907	0.888	0.881	0.948	0.858	0.833	0.89	0.791	0.908	0.917	0.905	0.841	0.867
	50.67	0.92	0.973	0.883	0.809	0.932	0.964	0.807	0.913	0.915	0.875	0.946	0.853	0.881	0.876	0.771	0.91	0.918	0.885	0.829	0.869
	50.75	0.94	0.953	0.905	0.845	0.917	0.966	0.814	0.928	0.904	0.89	0.945	0.841	0.863	0.888	0.796	0.842	0.913	0.91	0.84	0.868
	50.83	0.916	0.941	0.904	0.842	0.916	0.965	0.821	0.905	0.9	0.881	0.927	0.851	0.871	0.917	0.834	0.825	0.892	0.917	0.848	0.854
	50.92	0.929	0.932	0.894	0.825	0.912	0.972	0.827	0.866	0.9	0.864	0.933	0.866	0.876	0.895	0.823	0.799	0.894	0.896	0.846	0.858
	51	0.923	0.941	0.884	0.816	0.92	0.984	0.836	0.868	0.92	0.865	0.972	0.846	0.86	0.889	0.82	0.815	0.897	0.904	0.872	0.865
	51.08	0.921	0.957	0.915	0.775	0.893	0.973	0.851	0.861	0.906	0.864	0.943	0.874	0.843	0.896	0.807	0.828	0.885	0.906	0.855	0.865
	51.17	0.914	0.939	0.908	0.799	0.91	0.977	0.853	0.881	0.904	0.88	0.913	0.837	0.834	0.876	0.791	0.813	0.917	0.922	0.858	0.881
	51.25	0.941	0.937	0.906	0.802	0.913	0.958	0.851	0.882	0.885	0.913	0.912	0.835	0.849	0.873	0.799	0.838	0.871	0.906	0.864	0.895
	51.33	0.932	0.946	0.908	0.796	0.916	0.946	0.837	0.869	0.868	0.914	0.935	0.897	0.856	0.865	0.866	0.832	0.892	0.897	0.854	0.896
	51.42	0.921	0.946	0.887	0.809	0.93	0.954	0.863	0.884	0.886	0.903	0.969	0.88	0.882	0.852	0.855	0.888	0.894	0.929	0.852	0.906
	51.5	0.892	0.929	0.882	0.813	0.932	0.979	0.873	0.868	0.869	0.902	0.994	0.879	0.854	0.855	0.834	0.872	0.905	0.921	0.858	0.905
	51.58	0.862	0.932	0.899	0.811	0.939	0.94	0.821	0.902	0.876	0.888	0.986	0.873	0.859	0.874	0.834	0.886	0.889	0.911	0.857	0.927
	51.67	0.861	0.945	0.921	0.809	0.913	0.939	0.844	0.907	0.886	0.905	0.973	0.859	0.816	0.881	0.819	0.892	0.901	0.898	0.848	0.934
	51.75	0.864	0.936	0.942	0.804	0.903	0.978	0.82	0.913	0.895	0.9	0.953	0.869	0.81	0.882	0.819	0.878	0.898	0.895	0.847	0.943
	51.83	0.86	0.915	0.95	0.847	0.879	0.968	0.829	0.913	0.889	0.905	0.984	0.882	0.856	0.863	0.821	0.849	0.914	0.907	0.86	0.931
	51.92	0.849	0.91	0.972	0.822	0.913	0.973	0.85	0.918	0.877	0.896	0.962	0.875	0.838	0.905	0.843	0.847	0.918	0.888	0.854	0.92
	52	0.845	1.021	0.937	0.825	0.952	0.967	0.839	0.912	0.914	0.891	0.959	0.915	0.837	0.903	0.837	0.859	0.952	0.864	0.846	0.924
	52.08	0.869	0.99	0.941	0.838	0.927	0.96	0.855	0.916	0.89	0.878	0.963	0.862	0.813	0.897	0.843	0.881	0.947	0.884	0.84	0.922
	52.17	0.886	0.946	0.943	0.863	0.916	0.957	0.856	0.907	0.894	0.903	0.968	0.906	0.812	0.867	0.839	0.878	0.926	0.891	0.855	0.917
	52.25	0.877	0.944	0.936	0.862	0.912	0.964	0.827	0.876	0.908	0.908	0.936	0.891	0.822	0.878	0.836	0.855	0.92	0.879	0.848	0.925
	52.33	0.924	0.945	0.946	0.806	0.92	3.505	0.865	0.839	0.91	0.908	0.933	0.896	0.823	0.91	0.911	0.861	0.944	0.908	0.829	1.02
	52.42	0.947	0.948	0.981	0.941	0.92	0.994	0.888	0.913	0.928	0.916	1.034	0.876	0.923	0.915	0.911	0.877	0.949	0.949	0.863	0.986
	52.5	0.879	0.93	0.969	0.93	0.91	0.998	0.872	0.879	0.904	0.873	0.969	0.91	0.822	0.919	0.873	0.903	0.923	0.916	0.865	0.894
	52.58	0.864	0.896	0.965	0.912	0.92	0.991	0.851	0.844	0.87	0.866	0.988	0.912	0.833	0.898	0.86	0.908	0.924	0.897	0.863	0.884
	52.67	0.858	0.894	0.948	0.913	0.906	0.983	0.884	0.847	0.864	0.863	0.959	0.936	0.846	0.933	0.876	0.861	0.917	0.904	0.852	0.883
	52.75	0.83	0.88	0.939	0.888	0.897	0.966	0.868	0.815	0.887	0.873	0.941	0.93	0.837	0.908	0.877	0.854	0.899	0.907	0.875	0.881
	52.83	0.827	0.887	0.944	0.864	0.899	0.955	0.867	0.909	0.899	0.936	0.96	0.917	0.856	0.844	0.854	0.834	0.903	0.916	0.899	0.874
	52.92	0.828	0.891	0.941	0.846	0.891	0.98	0.872	0.897	0.906	0.92	0.947	0.916	0.835	0.848	0.875	0.838	0.904	0.909	0.888	0.927
	53	0.827	0.851	0.917	0.853	0.899	0.981	0.858	0.92	0.924	0.92	0.951	0.898	0.863	0.85	0.843	0.843	0.873	0.914	0.884	0.941
	53.08	0.842	0.867	0.93	0.889	0.923	0.974	0.862	0.885	0.943	0.883	0.958	0.897	0.893	0.842	0.846	0.926	0.92	0.93	0.864	0.917
	53.17	0.874	0.864	0.947	0.9	0.921	0.981	0.862	0.9	0.943	0.91	0.941	0.897	0.83	0.864	0.875	0.941	0.895	0.915	0.881	0.878
	53.25	0.846	0.869	0.927	0.906	0.937	0.958	0.887	0.897	0.909	0.896	0.938	0.899	0.832	0.841	0.892	0.936	0.923	0.913	0.882	0.87
	53.33	0.826	0.855	0.923	0.919	0.952	0.957	0.886	0.886	0.896	0.895	0.93	0.916	0.922	0.836	0.869	0.892	0.95	0.909	0.873	0.861
	53.42	0.812	0.878	0.94	0.949	0.95	0.942	0.865	0.892	0.9	0.886	0.944	0.934	0.92	0.835	0.875	0.862	0.928	0.902	0.88	0.845
	53.5	0.857	0.855	0.935	0.953	0.962	0.955	0.862	0.885	0.888	0.878	0.938	0.923	0.903	0.817	0.869	0.853	0.891	0.911	0.895	0.851
	53.58	0.871	0.875	0.949	0.96	0.948	0.958	0.842	0.874	0.899	0.879	0.937	0.903	0.9	0.834	0.841	0.87	0.89	0.901	0.908	0.839
	53.67	0.867	0.86	0.924	0.963	0.91	0.96	0.852	0.865	0.897	0.903	0.928	0.931	0.873	0.839	0.81	0.899	0.893	0.916	0.865	0.885
	53.75	0.862	0.828	0.924	0.973	0.897	0.984	0.834	0.893	0.885	0.894	0.921	0.934	0.931	0.853	0.806	0.865	0.88	0.91	0.84	0.879
	53.83	0.881	0.841	0.913	0.977	0.899	0.949	0.828	0.879	0.888	0.917	0.955	0.949	0.915	0.865	0.821	0.863	0.902	0.941	0.824	0.891
	53.92	0.864	0.849	0.878	0.981	0.894	0.954	0.82	0.864	0.883	0.924	0.956	0.94	0.908	0.861	0.797	0.808	0.954	0.929	0.823	0.879
	54	0.829	0.843	0.892	0.968	0.863	0.951	0.834	0.843	0.879	0.93	0.958	0.908	0.886	0.875	0.818	0.887	0.96	0.875	0.796	0.874	t.test
	avg light	0.896454	0.92441	0.956102	0.936341	0.930925	0.929582	0.915936	0.893892	0.882222	0.919435	0.909244	0.889798	0.903216	0.907075	0.883094	0.906061	0.907061	0.904501	0.879806	0.902355	0.0238441
	avg dark	0.940729	0.94026	0.943205	0.993764	0.956778	0.927833	0.967986	0.916337	0.891875	0.931979	0.948906	0.924087	0.960632	0.901823	0.92392	0.95075	0.920566	0.92508	0.9265	0.927538	0.345147
	avg 24-hr	0.916102	0.931444	0.950379	0.961823	0.942398	0.928806	0.939034	0.903852	0.886505	0.925002	0.926844	0.905014	0.928695	0.904744	0.901211	0.925892	0.913054	0.913633	0.900527	0.91353	0.066625
WT	AVG	SEM		mKO	AVG	SEM
avg light	0.91853	0.0011044		avg light	0.899221	0.000703647
avg dark	0.941075	0.000767015		avg dark	0.93098	0.00055438
avg 24-hr	0.928534	0.00071589		avg 24-hr	0.913314	0.000502046
averages of each mouse
WT	AVG	SEM		mKO	AVG	SEM
Mean Light	0.91853	0.00703916		avg light	0.899221	0.00341542
Mean Dark	0.941075	0.00884617		avg dark	0.93098	0.00549152
Mean Total	0.928534	0.00702296		avg 24-hr	0.913314	0.00338361

## Sheet: Fig.7I
energy expenditure at 30C
		WT										mKO
	genotype	wt_1	wt_2	wt_3	wt_4	wt_5	wt_6	wt_7	wt_8	wt_9	wt_10	ko_1	ko_2	ko_3	ko_4	ko_5	ko_6	ko_7	ko_8	ko_9	ko_10
	Time (hr)	[kcal/h]	[kcal/h]	[kcal/h]	[kcal/h]	[kcal/h]	[kcal/h]	[kcal/h]	[kcal/h]	[kcal/h]	[kcal/h]	[kcal/h]	[kcal/h]	[kcal/h]	[kcal/h]	[kcal/h]	[kcal/h]	[kcal/h]	[kcal/h]	[kcal/h]	[kcal/h]
	0	0.278	0.413	0.329	0.341	0.271	0.219	0.264	0.253	0.329	0.315	0.256	0.279	0.258	0.371	0.34	0.239	0.303	0.292	0.309	0.45
	0.08	0.257	0.311	0.3	0.264	0.25	0.196	0.243	0.243	0.279	0.244	0.323	0.243	0.263	0.404	0.323	0.246	0.303	0.252	0.253	0.421
	0.17	0.25	0.293	0.301	0.275	0.243	0.197	0.238	0.254	0.258	0.285	0.3	0.251	0.267	0.306	0.257	0.194	0.271	0.275	0.239	0.334
	0.25	0.29	0.28	0.232	0.249	0.209	0.184	0.192	0.21	0.218	0.283	0.307	0.273	0.273	0.368	0.228	0.206	0.272	0.31	0.242	0.287
	0.33	0.297	0.269	0.228	0.251	0.225	0.176	0.21	0.206	0.215	0.287	0.279	0.255	0.239	0.34	0.215	0.201	0.243	0.313	0.197	0.242
	0.42	0.33	0.23	0.217	0.246	0.212	0.158	0.199	0.191	0.192	0.225	0.255	0.23	0.245	0.348	0.212	0.196	0.256	0.313	0.213	0.253
	0.5	0.286	0.216	0.226	0.242	0.212	0.162	0.182	0.191	0.169	0.222	0.243	0.317	0.227	0.206	0.217	0.198	0.239	0.278	0.201	0.225
	0.58	0.252	0.224	0.183	0.237	0.183	0.152	0.233	0.189	0.195	0.204	0.228	0.277	0.232	0.23	0.237	0.167	0.231	0.281	0.198	0.25
	0.67	0.228	0.232	0.315	0.224	0.175	0.155	0.236	0.181	0.187	0.208	0.223	0.278	0.214	0.225	0.203	0.168	0.255	0.219	0.209	0.192
	0.75	0.212	0.22	0.297	0.214	0.197	0.138	0.216	0.19	0.167	0.19	0.192	0.264	0.221	0.201	0.204	0.164	0.299	0.213	0.206	0.216
	0.83	0.233	0.213	0.295	0.217	0.178	0.141	0.203	0.183	0.164	0.213	0.195	0.379	0.208	0.198	0.281	0.157	0.278	0.191	0.204	0.361
	0.92	0.315	0.22	0.263	0.215	0.2	0.147	0.19	0.195	0.189	0.2	0.185	0.35	0.214	0.21	0.3	0.176	0.282	0.21	0.204	0.412
	1	0.311	0.231	0.265	0.214	0.265	0.142	0.194	0.178	0.18	0.193	0.19	0.278	0.288	0.195	0.247	0.213	0.272	0.183	0.188	0.29
	1.08	0.325	0.188	0.255	0.191	0.351	0.133	0.181	0.231	0.19	0.198	0.193	0.315	0.406	0.206	0.232	0.214	0.275	0.174	0.195	0.281
	1.17	0.31	0.187	0.249	0.198	0.334	0.127	0.185	0.255	0.176	0.28	0.186	0.4	0.374	0.186	0.214	0.162	0.257	0.192	0.194	0.245
	1.25	0.287	0.182	0.221	0.198	0.341	0.148	0.161	0.275	0.163	0.305	0.186	0.354	0.367	0.187	0.238	0.149	0.267	0.188	0.186	0.245
	1.33	0.255	0.195	0.239	0.208	0.339	0.156	0.174	0.217	0.192	0.286	0.179	0.363	0.317	0.193	0.22	0.146	0.332	0.172	0.171	0.245
	1.42	0.262	0.186	0.233	0.174	0.293	0.259	0.214	0.216	0.254	0.288	0.227	0.336	0.298	0.202	0.208	0.144	0.322	0.192	0.188	0.229
	1.5	0.273	0.212	0.22	0.229	0.274	0.202	0.217	0.192	0.293	0.25	0.272	0.301	0.291	0.283	0.242	0.148	0.308	0.174	0.238	0.246
	1.58	0.306	0.351	0.212	0.274	0.242	0.183	0.234	0.2	0.281	0.221	0.309	0.297	0.275	0.295	0.28	0.157	0.297	0.18	0.248	0.254
	1.67	0.278	0.372	0.307	0.298	0.257	0.186	0.328	0.144	0.28	0.215	0.222	0.404	0.252	0.34	0.261	0.156	0.249	0.168	0.33	0.228
	1.75	0.279	0.352	0.296	0.312	0.237	0.158	0.308	0.19	0.283	0.204	0.216	0.362	0.262	0.354	0.251	0.151	0.359	0.171	0.292	0.232
	1.83	0.257	0.313	0.264	0.315	0.253	0.155	0.303	0.157	0.315	0.185	0.208	0.346	0.281	0.258	0.21	0.157	0.292	0.24	0.31	0.207
	1.92	0.233	0.311	0.299	0.302	0.211	0.147	0.251	0.228	0.225	0.182	0.196	0.293	0.285	0.244	0.157	0.145	0.294	0.247	0.314	0.22
	2	0.226	0.329	0.331	0.314	0.228	0.153	0.236	0.19	0.186	0.181	0.2	0.29	0.276	0.222	0.16	0.151	0.273	0.239	0.374	0.218
	2.08	0.226	0.391	0.296	0.293	0.254	0.136	0.223	0.26	0.18	0.172	0.191	0.258	0.282	0.225	0.171	0.169	0.273	0.24	0.332	0.229
	2.17	0.25	0.311	0.295	0.281	0.23	0.146	0.217	0.264	0.16	0.182	0.192	0.232	0.26	0.208	0.168	0.223	0.285	0.215	0.314	0.203
	2.25	0.246	0.264	0.248	0.261	0.204	0.148	0.188	0.208	0.18	0.201	0.173	0.259	0.251	0.205	0.254	0.314	0.271	0.212	0.304	0.214
	2.33	0.218	0.255	0.236	0.269	0.231	0.141	0.194	0.187	0.162	0.225	0.178	0.243	0.223	0.201	0.287	0.235	0.244	0.23	0.247	0.203
	2.42	0.225	0.224	0.234	0.296	0.209	0.12	0.183	0.187	0.147	0.3	0.163	0.241	0.226	0.206	0.263	0.246	0.25	0.228	0.247	0.2
	2.5	0.23	0.196	0.236	0.269	0.219	0.141	0.183	0.178	0.139	0.296	0.194	0.245	0.217	0.193	0.278	0.249	0.253	0.264	0.254	0.196
	2.58	0.224	0.188	0.227	0.232	0.183	0.134	0.167	0.173	0.136	0.318	0.198	0.236	0.218	0.206	0.278	0.225	0.258	0.307	0.236	0.282
	2.67	0.225	0.185	0.229	0.235	0.214	0.138	0.197	0.14	0.141	0.328	0.322	0.224	0.207	0.189	0.23	0.226	0.245	0.331	0.222	0.378
	2.75	0.244	0.177	0.234	0.278	0.274	0.118	0.186	0.175	0.148	0.273	0.294	0.235	0.245	0.201	0.234	0.225	0.247	0.325	0.239	0.423
	2.83	0.357	0.193	0.228	0.292	0.307	0.137	0.184	0.172	0.14	0.266	0.321	0.289	0.241	0.179	0.266	0.196	0.242	0.272	0.224	0.375
	2.92	0.289	0.177	0.214	0.279	0.251	0.189	0.165	0.139	0.128	0.241	0.316	0.305	0.247	0.268	0.269	0.202	0.25	0.268	0.228	0.5
	3	0.274	0.181	0.215	0.279	0.239	0.213	0.163	0.18	0.138	0.241	0.425	0.354	0.232	0.321	0.242	0.18	0.215	0.225	0.213	0.298
	3.08	0.272	0.3	0.271	0.244	0.237	0.159	0.166	0.261	0.121	0.241	0.23	0.337	0.232	0.352	0.242	0.18	0.306	0.221	0.225	0.294
	3.17	0.324	0.3	0.293	0.247	0.215	0.123	0.153	0.326	0.177	0.231	0.216	0.327	0.319	0.317	0.302	0.19	0.341	0.201	0.204	0.252
	3.25	0.295	0.277	0.306	0.348	0.181	0.122	0.147	0.388	0.245	0.225	0.225	0.317	0.329	0.344	0.245	0.178	0.399	0.204	0.201	0.281
	3.33	0.273	0.332	0.275	0.347	0.194	0.13	0.283	0.327	0.334	0.222	0.234	0.325	0.367	0.307	0.27	0.189	0.307	0.186	0.181	0.25
	3.42	0.261	0.376	0.251	0.277	0.202	0.122	0.349	0.279	0.382	0.251	0.222	0.307	0.383	0.304	0.271	0.181	0.371	0.185	0.197	0.26
	3.5	0.253	0.424	0.251	0.341	0.183	0.121	0.335	0.26	0.332	0.283	0.236	0.425	0.379	0.256	0.255	0.156	0.326	0.173	0.197	0.255
	3.58	0.316	0.371	0.212	0.294	0.184	0.131	0.232	0.231	0.21	0.281	0.227	0.385	0.372	0.226	0.239	0.174	0.312	0.19	0.193	0.233
	3.67	0.315	0.381	0.221	0.289	0.186	0.131	0.223	0.214	0.221	0.268	0.309	0.319	0.327	0.277	0.228	0.212	0.26	0.193	0.207	0.208
	3.75	0.344	0.325	0.304	0.283	0.193	0.121	0.221	0.205	0.238	0.31	0.282	0.286	0.462	0.267	0.248	0.229	0.289	0.187	0.281	0.216
	3.83	0.289	0.285	0.283	0.281	0.193	0.121	0.213	0.218	0.205	0.279	0.316	0.263	0.407	0.225	0.209	0.22	0.286	0.185	0.252	0.207
	3.92	0.265	0.234	0.256	0.281	0.179	0.122	0.199	0.245	0.175	0.272	0.306	0.19	0.378	0.237	0.279	0.225	0.262	0.197	0.244	0.277
	4	0.247	0.236	0.332	0.277	0.196	0.121	0.205	0.219	0.196	0.256	0.29	0.324	0.372	0.237	0.266	0.21	0.212	0.173	0.278	0.269
	4.08	0.248	0.211	0.334	0.241	0.227	0.117	0.208	0.21	0.189	0.234	0.299	0.284	0.308	0.222	0.291	0.207	0.211	0.165	0.292	0.299
	4.17	0.245	0.211	0.322	0.258	0.244	0.132	0.202	0.193	0.169	0.231	0.235	0.326	0.297	0.223	0.311	0.168	0.225	0.166	0.339	0.252
	4.25	0.266	0.199	0.269	0.229	0.322	0.136	0.201	0.195	0.174	0.212	0.204	0.4	0.316	0.22	0.301	0.165	0.214	0.167	0.315	0.232
	4.33	0.291	0.21	0.263	0.217	0.356	0.14	0.214	0.175	0.163	0.219	0.21	0.397	0.286	0.287	0.274	0.166	0.197	0.25	0.267	0.274
	4.42	0.311	0.19	0.256	0.204	0.328	0.129	0.222	0.174	0.158	0.205	0.239	0.34	0.263	0.314	0.25	0.173	0.23	0.314	0.219	0.28
	4.5	0.315	0.225	0.259	0.22	0.362	0.246	0.218	0.181	0.137	0.206	0.241	0.379	0.268	0.348	0.225	0.146	0.352	0.348	0.212	0.26
	4.58	0.281	0.22	0.237	0.221	0.375	0.177	0.258	0.171	0.141	0.209	0.227	0.346	0.273	0.478	0.217	0.17	0.325	0.369	0.22	0.265
	4.67	0.245	0.192	0.241	0.225	0.454	0.185	0.356	0.156	0.16	0.221	0.248	0.329	0.245	0.273	0.222	0.173	0.257	0.31	0.218	0.28
	4.75	0.257	0.27	0.239	0.257	0.388	0.165	0.327	0.166	0.162	0.334	0.225	0.305	0.25	0.286	0.215	0.166	0.236	0.307	0.213	0.284
	4.83	0.381	0.226	0.232	0.3	0.398	0.151	0.298	0.224	0.137	0.331	0.231	0.316	0.251	0.302	0.197	0.151	0.221	0.254	0.197	0.323
	4.92	0.256	0.219	0.29	0.287	0.32	0.152	0.246	0.321	0.141	0.328	0.227	0.375	0.234	0.299	0.306	0.311	0.23	0.264	0.197	0.376
	5	0.221	0.208	0.31	0.276	0.288	0.146	0.236	0.287	0.153	0.304	0.276	0.352	0.274	0.274	0.363	0.306	0.193	0.228	0.19	0.362
	5.08	0.226	0.212	0.282	0.318	0.257	0.128	0.218	0.394	0.143	0.272	0.313	0.294	0.299	0.289	0.327	0.323	0.302	0.21	0.21	0.356
	5.17	0.258	0.204	0.303	0.306	0.259	0.143	0.217	0.268	0.13	0.3	0.303	0.454	0.263	0.26	0.294	0.254	0.379	0.213	0.219	0.308
	5.25	0.268	0.209	0.341	0.255	0.217	0.15	0.199	0.268	0.229	0.283	0.307	0.36	0.25	0.252	0.172	0.289	0.37	0.215	0.209	0.272
	5.33	0.237	0.187	0.339	0.301	0.254	0.156	0.207	0.211	0.34	0.277	0.259	0.323	0.242	0.234	0.18	0.25	0.413	0.195	0.194	0.237
	5.42	0.247	0.184	0.297	0.27	0.238	0.192	0.193	0.195	0.338	0.256	0.348	0.301	0.286	0.239	0.192	0.238	0.27	0.217	0.287	0.241
	5.5	0.252	0.192	0.311	0.286	0.224	0.18	0.197	0.218	0.21	0.249	0.281	0.318	0.27	0.287	0.176	0.22	0.276	0.337	0.339	0.232
	5.58	0.24	0.187	0.304	0.296	0.204	0.155	0.192	0.198	0.212	0.251	0.266	0.323	0.285	0.271	0.205	0.22	0.269	0.334	0.323	0.232
	5.67	0.216	0.189	0.306	0.283	0.197	0.16	0.21	0.194	0.201	0.253	0.259	0.297	0.26	0.344	0.212	0.231	0.247	0.259	0.319	0.235
	5.75	0.234	0.289	0.329	0.253	0.213	0.134	0.334	0.184	0.187	0.278	0.233	0.279	0.321	0.348	0.232	0.226	0.258	0.253	0.323	0.264
	5.83	0.251	0.255	0.345	0.285	0.208	0.144	0.324	0.203	0.173	0.262	0.226	0.367	0.328	0.312	0.202	0.2	0.255	0.226	0.299	0.388
	5.92	0.332	0.26	0.329	0.282	0.193	0.141	0.233	0.198	0.188	0.256	0.208	0.351	0.305	0.316	0.234	0.194	0.258	0.234	0.294	0.354
	6	0.313	0.258	0.34	0.265	0.277	0.144	0.264	0.197	0.183	0.252	0.217	0.309	0.286	0.423	0.355	0.333	0.27	0.223	0.247	0.341
	6.08	0.447	0.206	0.323	0.333	0.338	0.133	0.234	0.194	0.17	0.241	0.296	0.284	0.258	0.383	0.324	0.302	0.402	0.233	0.247	0.347
	6.17	0.382	0.259	0.318	0.318	0.305	0.169	0.236	0.202	0.169	0.271	0.277	0.328	0.258	0.331	0.242	0.338	0.304	0.225	0.258	0.321
	6.25	0.383	0.324	0.301	0.38	0.337	0.161	0.211	0.257	0.243	0.262	0.271	0.465	0.29	0.309	0.393	0.255	0.288	0.224	0.268	0.297
	6.33	0.413	0.359	0.303	0.371	0.299	0.178	0.221	0.263	0.323	0.247	0.304	0.428	0.359	0.358	0.243	0.374	0.353	0.31	0.278	0.289
	6.42	0.353	0.341	0.31	0.337	0.266	0.226	0.31	0.367	0.43	0.353	0.352	0.366	0.425	0.293	0.233	0.33	0.386	0.389	0.397	0.316
	6.5	0.463	0.389	0.36	0.341	0.259	0.281	0.303	0.438	0.282	0.392	0.447	0.475	0.427	0.24	0.238	0.25	0.432	0.362	0.405	0.275
	6.58	0.359	0.443	0.335	0.304	0.267	0.188	0.333	0.288	0.264	0.4	0.342	0.433	0.459	0.39	0.326	0.272	0.433	0.368	0.392	0.404
	6.67	0.346	0.366	0.366	0.344	0.429	0.203	0.39	0.228	0.366	0.39	0.384	0.479	0.536	0.368	0.446	0.261	0.42	0.273	0.457	0.39
	6.75	0.347	0.277	0.33	0.388	0.327	0.187	0.404	0.33	0.422	0.397	0.252	0.415	0.476	0.351	0.389	0.285	0.443	0.325	0.4	0.36
	6.83	0.357	0.379	0.343	0.42	0.34	0.192	0.421	0.293	0.318	0.464	0.389	0.398	0.409	0.413	0.42	0.323	0.499	0.394	0.467	0.435
	6.92	0.327	0.403	0.378	0.383	0.409	0.254	0.301	0.295	0.226	0.488	0.334	0.427	0.399	0.4	0.445	0.325	0.502	0.375	0.463	0.56
	7	0.303	0.367	0.337	0.327	0.574	0.261	0.356	0.245	0.342	0.486	0.411	0.465	0.435	0.474	0.448	0.433	0.466	0.301	0.481	0.526
	7.08	0.444	0.391	0.358	0.343	0.489	0.238	0.337	0.268	0.404	0.474	0.49	0.445	0.436	0.467	0.385	0.432	0.423	0.351	0.397	0.572
	7.17	0.469	0.453	0.391	0.336	0.517	0.211	0.377	0.308	0.395	0.497	0.445	0.401	0.434	0.433	0.298	0.491	0.401	0.384	0.435	0.571
	7.25	0.506	0.478	0.471	0.432	0.407	0.203	0.33	0.266	0.305	0.453	0.371	0.553	0.438	0.392	0.522	0.367	0.398	0.405	0.442	0.52
	7.33	0.485	0.516	0.402	0.451	0.544	0.214	0.377	0.232	0.33	0.483	0.544	0.515	0.422	0.427	0.344	0.348	0.35	0.396	0.345	0.688
	7.42	0.444	0.379	0.466	0.347	0.542	0.175	0.446	0.219	0.316	0.398	0.36	0.489	0.488	0.507	0.337	0.349	0.428	0.526	0.442	0.653
	7.5	0.359	0.388	0.476	0.394	0.519	0.274	0.423	0.348	0.252	0.438	0.513	0.417	0.459	0.315	0.371	0.454	0.445	0.524	0.49	0.503
	7.58	0.415	0.427	0.473	0.474	0.373	0.231	0.346	0.446	0.375	0.36	0.437	0.469	0.472	0.325	0.385	0.291	0.447	0.541	0.5	0.432
	7.67	0.45	0.421	0.582	0.444	0.423	0.327	0.374	0.401	0.372	0.34	0.389	0.572	0.404	0.414	0.388	0.289	0.387	0.412	0.441	0.62
	7.75	0.376	0.428	0.421	0.485	0.441	0.229	0.446	0.441	0.288	0.4	0.43	0.451	0.555	0.44	0.39	0.279	0.501	0.453	0.426	0.655
	7.83	0.39	0.583	0.393	0.471	0.475	0.198	0.397	0.391	0.278	0.398	0.426	0.414	0.401	0.442	0.486	0.24	0.423	0.51	0.508	0.521
	7.92	0.442	0.62	0.421	0.396	0.384	0.213	0.354	0.388	0.3	0.349	0.404	0.394	0.398	0.53	0.452	0.364	0.455	0.521	0.55	0.618
	8	0.375	0.639	0.431	0.445	0.465	0.252	0.413	0.321	0.38	0.33	0.344	0.443	0.428	0.535	0.445	0.44	0.418	0.425	0.54	0.675
	8.08	0.359	0.542	0.385	0.425	0.515	0.161	0.442	0.321	0.394	0.335	0.451	0.432	0.405	0.537	0.404	0.462	0.519	0.35	0.57	0.656
	8.17	0.485	0.465	0.411	0.436	0.484	0.183	0.465	0.307	0.298	0.358	0.509	0.423	0.431	0.463	0.41	0.404	0.526	0.322	0.498	0.527
	8.25	0.468	0.537	0.477	0.419	0.433	0.268	0.409	0.277	0.285	0.394	0.519	0.503	0.438	0.461	0.368	0.467	0.561	0.333	0.507	0.591
	8.33	0.433	0.499	0.385	0.402	0.454	0.286	0.41	0.256	0.253	0.378	0.414	0.48	0.583	0.411	0.549	0.365	0.438	0.308	0.45	0.644
	8.42	0.479	0.579	0.502	0.428	0.376	0.247	0.467	0.394	0.224	0.457	0.398	0.439	0.453	0.447	0.548	0.342	0.483	0.361	0.369	0.628
	8.5	0.383	0.508	0.504	0.415	0.365	0.246	0.462	0.428	0.201	0.496	0.438	0.546	0.47	0.479	0.298	0.281	0.43	0.315	0.391	0.672
	8.58	0.358	0.518	0.241	0.292	0.312	0.255	0.33	0.278	0.241	0.555	0.396	0.56	0.443	0.32	0.327	0.419	0.459	0.321	0.409	0.62
	8.67	0.443	0.52	0.422	0.37	0.316	0.24	0.327	0.33	0.27	0.525	0.548	0.639	0.49	0.341	0.421	0.414	0.374	0.354	0.473	0.684
	8.75	0.396	0.417	0.466	0.361	0.319	0.222	0.413	0.393	0.257	0.514	0.398	0.527	0.371	0.389	0.405	0.447	0.43	0.335	0.517	0.651
	8.83	0.504	0.548	0.458	0.392	0.319	0.208	0.445	0.451	0.27	0.629	0.515	0.606	0.417	0.343	0.352	0.361	0.592	0.406	0.412	0.534
	8.92	0.375	0.576	0.407	0.477	0.376	0.343	0.341	0.351	0.316	0.529	0.548	0.544	0.446	0.301	0.554	0.428	0.534	0.399	0.419	0.472
	9	0.465	0.545	0.406	0.477	0.399	0.34	0.4	0.355	0.403	0.518	0.439	0.51	0.477	0.396	0.332	0.383	0.486	0.426	0.636	0.594
	9.08	0.372	0.5	0.494	0.354	0.355	0.252	0.431	0.398	0.364	0.524	0.453	0.469	0.445	0.431	0.337	0.367	0.61	0.516	0.47	0.592
	9.17	0.339	0.496	0.521	0.476	0.361	0.301	0.386	0.285	0.319	0.539	0.412	0.542	0.382	0.43	0.379	0.44	0.545	0.456	0.518	0.598
	9.25	0.409	0.443	0.494	0.42	0.325	0.337	0.457	0.263	0.291	0.498	0.376	0.585	0.38	0.447	0.521	0.389	0.526	0.481	0.552	0.682
	9.33	0.407	0.483	0.53	0.41	0.412	0.337	0.487	0.242	0.269	0.451	0.382	0.579	0.442	0.48	0.598	0.373	0.409	0.386	0.51	0.605
	9.42	0.357	0.575	0.498	0.377	0.295	0.276	0.458	0.234	0.295	0.573	0.511	0.52	0.457	0.554	0.568	0.374	0.545	0.378	0.526	0.632
	9.5	0.404	0.696	0.47	0.399	0.298	0.278	0.482	0.412	0.291	0.409	0.462	0.594	0.419	0.48	0.439	0.513	0.488	0.346	0.446	0.59
	9.58	0.412	0.636	0.374	0.394	0.295	0.242	0.452	0.283	0.309	0.498	0.596	0.553	0.404	0.569	0.483	0.569	0.472	0.374	0.509	0.677
	9.67	0.408	0.589	0.42	0.398	0.417	0.223	0.453	0.284	0.298	0.51	0.567	0.734	0.389	0.497	0.443	0.522	0.442	0.352	0.464	0.631
	9.75	0.396	0.546	0.42	0.416	0.405	0.246	0.477	0.357	0.431	0.585	0.586	0.636	0.375	0.463	0.467	0.489	0.493	0.432	0.415	0.633
	9.83	0.341	0.49	0.411	0.521	0.411	0.291	0.475	0.367	0.3	0.616	0.608	0.606	0.396	0.439	0.507	0.463	0.437	0.496	0.436	0.559
	9.92	0.521	0.442	0.349	0.511	0.386	0.365	0.412	0.448	0.281	0.679	0.605	0.592	0.373	0.467	0.359	0.387	0.416	0.519	0.448	0.503
	10	0.399	0.452	0.376	0.535	0.335	0.29	0.36	0.409	0.157	0.666	0.638	0.485	0.502	0.42	0.407	0.455	0.505	0.49	0.461	0.617
	10.08	0.38	0.395	0.387	0.546	0.371	0.265	0.347	0.371	0.173	0.587	0.623	0.436	0.449	0.454	0.396	0.427	0.501	0.517	0.507	0.662
	10.17	0.407	0.589	0.455	0.566	0.444	0.197	0.437	0.358	0.167	0.564	0.63	0.517	0.435	0.388	0.611	0.308	0.487	0.515	0.495	0.513
	10.25	0.345	0.569	0.366	0.409	0.502	0.286	0.473	0.402	0.192	0.635	0.557	0.453	0.509	0.364	0.624	0.353	0.571	0.566	0.552	0.476
	10.33	0.338	0.536	0.459	0.436	0.522	0.336	0.389	0.394	0.225	0.656	0.602	0.405	0.5	0.464	0.473	0.417	0.514	0.501	0.445	0.445
	10.42	0.372	0.393	0.364	0.357	0.61	0.211	0.422	0.388	0.294	0.454	0.606	0.408	0.585	0.458	0.499	0.405	0.561	0.438	0.513	0.438
	10.5	0.519	0.491	0.352	0.477	0.597	0.316	0.399	0.359	0.267	0.562	0.476	0.526	0.619	0.337	0.515	0.28	0.551	0.505	0.555	0.367
	10.58	0.345	0.624	0.331	0.424	0.478	0.34	0.427	0.352	0.381	0.592	0.489	0.469	0.622	0.432	0.594	0.404	0.607	0.521	0.489	0.395
	10.67	0.4	0.597	0.326	0.423	0.54	0.382	0.404	0.328	0.28	0.595	0.507	0.529	0.453	0.398	0.637	0.428	0.496	0.407	0.46	0.487
	10.75	0.475	0.666	0.365	0.525	0.581	0.235	0.37	0.3	0.245	0.623	0.538	0.51	0.475	0.348	0.609	0.456	0.498	0.419	0.511	0.464
	10.83	0.647	0.575	0.351	0.515	0.473	0.249	0.39	0.238	0.215	0.55	0.656	0.577	0.582	0.394	0.471	0.476	0.537	0.374	0.551	0.54
	10.92	0.349	0.449	0.354	0.459	0.501	0.314	0.455	0.234	0.336	0.599	0.624	0.584	0.571	0.49	0.478	0.513	0.524	0.37	0.549	0.579
	11	0.351	0.416	0.409	0.499	0.371	0.32	0.386	0.205	0.31	0.587	0.508	0.522	0.389	0.423	0.433	0.346	0.478	0.321	0.525	0.599
	11.08	0.394	0.362	0.427	0.455	0.503	0.296	0.436	0.261	0.282	0.576	0.497	0.46	0.394	0.494	0.479	0.326	0.524	0.296	0.393	0.613
	11.17	0.386	0.393	0.463	0.419	0.482	0.26	0.402	0.25	0.361	0.523	0.442	0.53	0.42	0.537	0.381	0.479	0.5	0.394	0.439	0.443
	11.25	0.388	0.377	0.436	0.5	0.417	0.254	0.339	0.229	0.383	0.471	0.411	0.493	0.402	0.678	0.575	0.509	0.473	0.396	0.418	0.654
	11.33	0.439	0.392	0.522	0.523	0.357	0.243	0.335	0.193	0.422	0.426	0.393	0.461	0.519	0.59	0.438	0.487	0.517	0.39	0.312	0.56
	11.42	0.476	0.319	0.563	0.386	0.426	0.199	0.303	0.26	0.288	0.418	0.477	0.539	0.489	0.629	0.448	0.479	0.48	0.365	0.321	0.65
	11.5	0.495	0.349	0.559	0.478	0.366	0.2	0.313	0.311	0.379	0.372	0.429	0.466	0.487	0.555	0.483	0.365	0.457	0.24	0.349	0.584
	11.58	0.481	0.326	0.539	0.439	0.454	0.333	0.365	0.364	0.367	0.333	0.463	0.421	0.509	0.512	0.422	0.477	0.401	0.268	0.382	0.539
	11.67	0.521	0.349	0.515	0.428	0.529	0.29	0.384	0.344	0.373	0.335	0.389	0.497	0.584	0.4	0.381	0.552	0.351	0.349	0.362	0.538
	11.75	0.528	0.439	0.537	0.46	0.548	0.281	0.387	0.384	0.354	0.271	0.398	0.471	0.668	0.358	0.348	0.526	0.371	0.505	0.407	0.557
	11.83	0.565	0.538	0.543	0.555	0.568	0.335	0.376	0.341	0.24	0.283	0.573	0.457	0.566	0.441	0.457	0.53	0.352	0.494	0.353	0.485
	11.92	0.538	0.35	0.46	0.572	0.489	0.261	0.335	0.359	0.296	0.281	0.574	0.411	0.619	0.477	0.378	0.417	0.373	0.474	0.358	0.358
	12	0.525	0.353	0.499	0.543	0.551	0.236	0.319	0.314	0.28	0.269	0.511	0.358	0.604	0.396	0.506	0.442	0.299	0.498	0.31	0.305
	12.08	0.522	0.337	0.454	0.402	0.545	0.308	0.504	0.296	0.284	0.244	0.545	0.385	0.526	0.368	0.526	0.423	0.346	0.532	0.304	0.303
	12.17	0.506	0.334	0.438	0.458	0.596	0.236	0.47	0.254	0.306	0.279	0.517	0.375	0.62	0.454	0.379	0.437	0.421	0.481	0.367	0.287
	12.25	0.645	0.336	0.42	0.409	0.487	0.195	0.45	0.264	0.398	0.279	0.585	0.349	0.569	0.51	0.384	0.577	0.409	0.453	0.379	0.265
	12.33	0.54	0.358	0.37	0.436	0.402	0.179	0.385	0.225	0.366	0.296	0.493	0.335	0.467	0.615	0.369	0.54	0.412	0.458	0.414	0.273
	12.42	0.502	0.331	0.307	0.414	0.543	0.156	0.421	0.249	0.283	0.415	0.49	0.373	0.576	0.606	0.364	0.462	0.401	0.435	0.359	0.265
	12.5	0.508	0.404	0.336	0.415	0.505	0.173	0.44	0.23	0.243	0.329	0.518	0.37	0.573	0.561	0.3	0.372	0.46	0.394	0.27	0.26
	12.58	0.543	0.42	0.357	0.407	0.311	0.186	0.389	0.316	0.236	0.448	0.485	0.317	0.588	0.489	0.459	0.346	0.435	0.424	0.269	0.246
	12.67	0.513	0.4	0.327	0.382	0.327	0.188	0.412	0.208	0.257	0.469	0.374	0.408	0.588	0.502	0.322	0.304	0.331	0.361	0.321	0.23
	12.75	0.503	0.422	0.294	0.326	0.338	0.176	0.367	0.182	0.258	0.491	0.378	0.441	0.609	0.497	0.32	0.296	0.33	0.315	0.417	0.251
	12.83	0.519	0.36	0.297	0.417	0.336	0.177	0.382	0.22	0.253	0.58	0.444	0.39	0.556	0.602	0.327	0.252	0.359	0.282	0.398	0.221
	12.92	0.535	0.278	0.395	0.428	0.338	0.241	0.319	0.216	0.307	0.499	0.421	0.434	0.6	0.614	0.412	0.344	0.339	0.29	0.431	0.287
	13	0.542	0.307	0.299	0.445	0.334	0.19	0.321	0.206	0.419	0.495	0.374	0.461	0.504	0.649	0.343	0.355	0.364	0.285	0.384	0.486
	13.08	0.643	0.279	0.461	0.378	0.307	0.201	0.311	0.227	0.403	0.47	0.37	0.43	0.503	0.642	0.343	0.362	0.42	0.322	0.416	0.488
	13.17	0.493	0.297	0.505	0.362	0.302	0.326	0.326	0.262	0.359	0.45	0.439	0.386	0.54	0.596	0.256	0.366	0.508	0.414	0.436	0.446
	13.25	0.506	0.278	0.307	0.395	0.288	0.245	0.28	0.427	0.308	0.445	0.403	0.366	0.57	0.52	0.347	0.439	0.481	0.403	0.419	0.475
	13.33	0.47	0.324	0.34	0.429	0.315	0.216	0.306	0.364	0.317	0.442	0.379	0.432	0.544	0.59	0.427	0.479	0.216	0.322	0.354	0.402
	13.42	0.469	0.331	0.315	0.363	0.475	0.162	0.32	0.345	0.451	0.388	0.283	0.405	0.563	0.577	0.477	0.448	0.313	0.446	0.329	0.5
	13.5	0.494	0.376	0.324	0.373	0.483	0.184	0.33	0.423	0.398	0.361	0.296	0.421	0.477	0.448	0.386	0.472	0.291	0.484	0.379	0.452
	13.58	0.566	0.364	0.282	0.42	0.322	0.166	0.273	0.297	0.438	0.34	0.308	0.315	0.439	0.418	0.348	0.35	0.285	0.467	0.337	0.562
	13.67	0.494	0.438	0.286	0.391	0.317	0.165	0.321	0.284	0.279	0.312	0.351	0.296	0.499	0.377	0.265	0.333	0.438	0.532	0.285	0.485
	13.75	0.46	0.396	0.289	0.397	0.336	0.177	0.297	0.266	0.374	0.284	0.286	0.271	0.438	0.371	0.252	0.328	0.41	0.538	0.26	0.461
	13.83	0.457	0.363	0.293	0.404	0.289	0.2	0.266	0.283	0.4	0.265	0.355	0.277	0.5	0.342	0.376	0.287	0.249	0.575	0.313	0.286
	13.92	0.378	0.519	0.348	0.384	0.258	0.173	0.227	0.303	0.495	0.266	0.316	0.298	0.48	0.303	0.401	0.308	0.255	0.544	0.321	0.373
	14	0.353	0.543	0.351	0.396	0.28	0.178	0.459	0.262	0.461	0.262	0.349	0.371	0.612	0.294	0.348	0.382	0.404	0.385	0.425	0.326
	14.08	0.312	0.485	0.355	0.355	0.281	0.189	0.4	0.251	0.275	0.296	0.413	0.343	0.485	0.304	0.416	0.344	0.298	0.316	0.283	0.339
	14.17	0.312	0.485	0.355	0.355	0.281	0.189	0.4	0.251	0.275	0.296	0.413	0.343	0.485	0.304	0.416	0.344	0.298	0.316	0.283	0.339
	14.25	0.367	0.502	0.446	0.379	0.224	0.166	0.342	0.23	0.288	0.39	0.462	0.386	0.438	0.307	0.35	0.502	0.338	0.296	0.292	0.36
	14.33	0.339	0.45	0.381	0.41	0.275	0.162	0.336	0.191	0.264	0.383	0.344	0.417	0.393	0.311	0.337	0.44	0.469	0.333	0.306	0.339
	14.42	0.3	0.531	0.386	0.37	0.247	0.246	0.323	0.205	0.277	0.331	0.39	0.358	0.37	0.31	0.328	0.443	0.308	0.341	0.256	0.332
	14.5	0.282	0.475	0.392	0.349	0.245	0.208	0.323	0.245	0.252	0.293	0.467	0.441	0.334	0.274	0.338	0.434	0.408	0.3	0.284	0.267
	14.58	0.271	0.395	0.33	0.327	0.227	0.277	0.293	0.233	0.224	0.29	0.358	0.488	0.337	0.263	0.355	0.366	0.432	0.31	0.273	0.285
	14.67	0.252	0.422	0.478	0.333	0.24	0.267	0.439	0.225	0.213	0.285	0.364	0.468	0.307	0.265	0.317	0.35	0.356	0.253	0.285	0.263
	14.75	0.245	0.549	0.377	0.311	0.228	0.199	0.325	0.253	0.191	0.254	0.431	0.408	0.349	0.28	0.338	0.328	0.352	0.223	0.271	0.25
	14.83	0.391	0.557	0.367	0.395	0.245	0.207	0.372	0.404	0.188	0.252	0.471	0.491	0.438	0.318	0.358	0.273	0.421	0.236	0.421	0.244
	14.92	0.302	0.595	0.401	0.427	0.229	0.14	0.335	0.321	0.23	0.253	0.462	0.442	0.446	0.323	0.371	0.274	0.451	0.27	0.377	0.311
	15	0.371	0.567	0.395	0.44	0.24	0.142	0.306	0.308	0.196	0.248	0.373	0.348	0.404	0.362	0.335	0.25	0.389	0.377	0.428	0.348
	15.08	0.36	0.58	0.281	0.382	0.301	0.132	0.298	0.233	0.192	0.297	0.453	0.302	0.245	0.383	0.369	0.248	0.417	0.332	0.404	0.351
	15.17	0.335	0.555	0.278	0.427	0.341	0.195	0.275	0.349	0.153	0.313	0.403	0.316	0.24	0.528	0.35	0.253	0.464	0.282	0.378	0.369
	15.25	0.295	0.458	0.268	0.456	0.24	0.241	0.352	0.36	0.198	0.331	0.441	0.312	0.248	0.619	0.345	0.264	0.37	0.3	0.388	0.346
	15.33	0.283	0.452	0.274	0.449	0.246	0.255	0.337	0.381	0.185	0.313	0.485	0.337	0.256	0.605	0.279	0.266	0.356	0.283	0.468	0.299
	15.42	0.288	0.589	0.338	0.433	0.236	0.217	0.46	0.357	0.185	0.259	0.409	0.325	0.334	0.597	0.29	0.264	0.378	0.269	0.431	0.339
	15.5	0.275	0.496	0.337	0.373	0.234	0.278	0.464	0.303	0.152	0.25	0.462	0.337	0.325	0.662	0.369	0.206	0.388	0.321	0.458	0.324
	15.58	0.264	0.376	0.305	0.314	0.227	0.205	0.307	0.281	0.225	0.349	0.346	0.305	0.298	0.59	0.306	0.241	0.484	0.338	0.445	0.394
	15.67	0.249	0.386	0.29	0.319	0.254	0.205	0.337	0.251	0.241	0.359	0.391	0.286	0.27	0.584	0.295	0.219	0.495	0.305	0.344	0.425
	15.75	0.295	0.315	0.301	0.254	0.248	0.186	0.332	0.245	0.187	0.265	0.384	0.296	0.364	0.594	0.304	0.214	0.31	0.398	0.316	0.398
	15.83	0.401	0.317	0.306	0.338	0.232	0.176	0.333	0.29	0.194	0.271	0.338	0.379	0.399	0.6	0.413	0.196	0.318	0.43	0.277	0.407
	15.92	0.296	0.315	0.348	0.44	0.293	0.237	0.293	0.301	0.172	0.293	0.323	0.447	0.38	0.374	0.355	0.258	0.328	0.431	0.244	0.405
	16	0.284	0.298	0.344	0.435	0.346	0.242	0.32	0.257	0.185	0.29	0.367	0.374	0.446	0.336	0.326	0.333	0.403	0.302	0.224	0.41
	16.08	0.269	0.338	0.452	0.355	0.343	0.149	0.432	0.263	0.264	0.261	0.457	0.416	0.441	0.316	0.429	0.331	0.321	0.361	0.237	0.397
	16.17	0.287	0.383	0.468	0.438	0.344	0.152	0.436	0.269	0.245	0.266	0.437	0.444	0.405	0.323	0.345	0.259	0.417	0.308	0.381	0.354
	16.25	0.385	0.389	0.292	0.493	0.208	0.153	0.303	0.312	0.299	0.251	0.389	0.379	0.404	0.33	0.333	0.273	0.397	0.315	0.386	0.402
	16.33	0.372	0.446	0.398	0.556	0.259	0.161	0.342	0.32	0.371	0.246	0.299	0.361	0.375	0.292	0.303	0.269	0.399	0.333	0.266	0.335
	16.42	0.394	0.357	0.454	0.488	0.238	0.202	0.321	0.39	0.253	0.248	0.243	0.355	0.339	0.321	0.356	0.241	0.429	0.341	0.299	0.314
	16.5	0.34	0.33	0.466	0.479	0.234	0.215	0.303	0.3	0.234	0.224	0.351	0.349	0.289	0.364	0.328	0.311	0.451	0.303	0.236	0.285
	16.58	0.295	0.287	0.391	0.402	0.344	0.21	0.374	0.355	0.227	0.23	0.319	0.361	0.292	0.343	0.26	0.402	0.456	0.311	0.218	0.308
	16.67	0.289	0.288	0.366	0.383	0.319	0.238	0.43	0.29	0.268	0.227	0.329	0.411	0.285	0.376	0.332	0.52	0.372	0.326	0.379	0.444
	16.75	0.267	0.258	0.373	0.31	0.304	0.224	0.328	0.306	0.279	0.198	0.386	0.367	0.32	0.396	0.357	0.477	0.356	0.276	0.394	0.46
	16.83	0.253	0.285	0.387	0.318	0.286	0.208	0.352	0.238	0.231	0.303	0.484	0.378	0.361	0.534	0.388	0.334	0.364	0.27	0.389	0.465
	16.92	0.325	0.345	0.372	0.433	0.469	0.187	0.334	0.264	0.221	0.41	0.485	0.391	0.361	0.562	0.401	0.291	0.366	0.287	0.38	0.459
	17	0.336	0.321	0.389	0.423	0.478	0.188	0.403	0.265	0.301	0.369	0.332	0.545	0.43	0.658	0.371	0.283	0.32	0.283	0.438	0.429
	17.08	0.337	0.271	0.478	0.406	0.375	0.189	0.318	0.292	0.36	0.402	0.303	0.41	0.36	0.66	0.336	0.271	0.423	0.343	0.397	0.443
	17.17	0.367	0.255	0.439	0.4	0.403	0.22	0.307	0.249	0.278	0.472	0.439	0.353	0.347	0.491	0.284	0.251	0.45	0.395	0.396	0.658
	17.25	0.287	0.261	0.373	0.425	0.319	0.157	0.417	0.316	0.215	0.501	0.381	0.312	0.336	0.421	0.385	0.27	0.5	0.395	0.432	0.563
	17.33	0.29	0.257	0.423	0.417	0.329	0.159	0.333	0.321	0.319	0.53	0.406	0.309	0.26	0.466	0.362	0.277	0.377	0.414	0.374	0.628
	17.42	0.268	0.219	0.43	0.343	0.325	0.166	0.333	0.381	0.213	0.395	0.444	0.292	0.255	0.437	0.334	0.257	0.465	0.331	0.31	0.562
	17.5	0.292	0.25	0.417	0.416	0.313	0.178	0.319	0.322	0.241	0.36	0.339	0.298	0.246	0.442	0.296	0.236	0.522	0.324	0.345	0.493
	17.58	0.274	0.216	0.326	0.444	0.28	0.17	0.278	0.35	0.408	0.354	0.287	0.306	0.241	0.32	0.332	0.327	0.493	0.324	0.385	0.386
	17.67	0.263	0.224	0.294	0.418	0.318	0.188	0.281	0.345	0.326	0.334	0.28	0.353	0.267	0.324	0.336	0.231	0.451	0.271	0.275	0.318
	17.75	0.297	0.215	0.276	0.391	0.29	0.152	0.271	0.348	0.349	0.281	0.273	0.347	0.257	0.33	0.339	0.223	0.451	0.302	0.267	0.302
	17.83	0.268	0.217	0.269	0.373	0.281	0.176	0.259	0.334	0.374	0.29	0.248	0.35	0.222	0.255	0.313	0.212	0.388	0.356	0.282	0.296
	17.92	0.251	0.269	0.256	0.371	0.262	0.171	0.3	0.333	0.332	0.254	0.245	0.303	0.227	0.252	0.382	0.223	0.392	0.346	0.271	0.317
	18	0.239	0.248	0.247	0.377	0.33	0.169	0.396	0.306	0.232	0.25	0.28	0.241	0.21	0.293	0.434	0.234	0.427	0.262	0.286	0.296
	18.08	0.262	0.248	0.345	0.309	0.352	0.116	0.473	0.272	0.363	0.252	0.277	0.228	0.347	0.316	0.421	0.226	0.429	0.306	0.292	0.297
	18.17	0.334	0.297	0.354	0.352	0.353	0.134	0.424	0.249	0.351	0.27	0.258	0.241	0.428	0.372	0.42	0.3	0.355	0.293	0.327	0.404
	18.25	0.407	0.434	0.336	0.334	0.423	0.163	0.361	0.26	0.367	0.268	0.251	0.245	0.419	0.527	0.509	0.384	0.322	0.296	0.306	0.288
	18.33	0.487	0.471	0.369	0.345	0.368	0.165	0.396	0.223	0.355	0.281	0.263	0.317	0.332	0.557	0.386	0.329	0.275	0.345	0.369	0.344
	18.42	0.49	0.439	0.355	0.306	0.391	0.194	0.375	0.222	0.289	0.329	0.238	0.31	0.501	0.507	0.365	0.327	0.314	0.33	0.454	0.384
	18.5	0.362	0.317	0.377	0.316	0.408	0.333	0.387	0.262	0.227	0.439	0.236	0.291	0.474	0.515	0.291	0.379	0.282	0.307	0.523	0.469
	18.58	0.366	0.468	0.395	0.322	0.456	0.309	0.378	0.241	0.136	0.509	0.247	0.26	0.469	0.505	0.289	0.318	0.289	0.294	0.578	0.484
	18.67	0.365	0.382	0.384	0.307	0.499	0.253	0.373	0.216	0.223	0.519	0.259	0.348	0.381	0.483	0.291	0.273	0.252	0.251	0.52	0.486
	18.75	0.346	0.368	0.365	0.276	0.477	0.288	0.361	0.239	0.243	0.443	0.234	0.411	0.318	0.479	0.268	0.29	0.297	0.271	0.442	0.493
	18.83	0.352	0.36	0.377	0.292	0.47	0.224	0.372	0.192	0.195	0.456	0.232	0.356	0.306	0.481	0.263	0.245	0.312	0.253	0.426	0.47
	18.92	0.327	0.433	0.316	0.314	0.34	0.21	0.352	0.213	0.185	0.438	0.224	0.457	0.309	0.445	0.271	0.238	0.357	0.258	0.434	0.378
	19	0.318	0.412	0.291	0.319	0.341	0.217	0.324	0.197	0.177	0.431	0.214	0.408	0.25	0.362	0.308	0.246	0.341	0.255	0.5	0.396
	19.08	0.284	0.308	0.269	0.251	0.29	0.173	0.266	0.197	0.195	0.315	0.22	0.375	0.268	0.337	0.284	0.228	0.223	0.252	0.322	0.372
	19.17	0.26	0.285	0.258	0.262	0.306	0.181	0.263	0.238	0.197	0.291	0.212	0.354	0.259	0.297	0.202	0.223	0.289	0.24	0.266	0.291
	19.25	0.25	0.27	0.239	0.301	0.193	0.171	0.23	0.238	0.195	0.264	0.204	0.339	0.243	0.269	0.215	0.295	0.265	0.246	0.267	0.281
	19.33	0.223	0.262	0.252	0.286	0.271	0.163	0.227	0.214	0.197	0.267	0.216	0.317	0.274	0.272	0.28	0.291	0.256	0.23	0.266	0.275
	19.42	0.239	0.228	0.238	0.266	0.311	0.124	0.213	0.312	0.199	0.236	0.206	0.312	0.278	0.308	0.312	0.276	0.257	0.217	0.273	0.278
	19.5	0.23	0.22	0.234	0.266	0.299	0.15	0.221	0.233	0.164	0.243	0.256	0.312	0.257	0.267	0.264	0.298	0.245	0.238	0.245	0.254
	19.58	0.234	0.212	0.269	0.284	0.284	0.157	0.256	0.388	0.173	0.232	0.267	0.285	0.233	0.356	0.266	0.434	0.258	0.239	0.26	0.242
	19.67	0.233	0.214	0.339	0.288	0.321	0.154	0.256	0.238	0.164	0.236	0.313	0.24	0.248	0.392	0.231	0.452	0.257	0.22	0.223	0.242
	19.75	0.274	0.18	0.298	0.297	0.282	0.155	0.293	0.266	0.196	0.222	0.255	0.234	0.23	0.335	0.212	0.43	0.366	0.231	0.239	0.23
	19.83	0.273	0.203	0.291	0.333	0.279	0.168	0.326	0.235	0.148	0.212	0.234	0.344	0.253	0.436	0.314	0.437	0.361	0.289	0.222	0.214
	19.92	0.315	0.204	0.308	0.32	0.224	0.158	0.214	0.25	0.167	0.258	0.223	0.328	0.229	0.276	0.232	0.351	0.314	0.294	0.225	0.253
	20	0.328	0.193	0.281	0.337	0.232	0.157	0.196	0.239	0.16	0.295	0.232	0.288	0.252	0.271	0.227	0.283	0.241	0.312	0.222	0.255
	20.08	0.29	0.188	0.248	0.312	0.243	0.139	0.188	0.214	0.168	0.317	0.223	0.27	0.276	0.269	0.232	0.269	0.273	0.291	0.21	0.246
	20.17	0.277	0.225	0.235	0.352	0.235	0.135	0.187	0.22	0.155	0.377	0.228	0.253	0.284	0.374	0.278	0.219	0.252	0.263	0.213	0.231
	20.25	0.275	0.211	0.225	0.308	0.215	0.132	0.188	0.201	0.18	0.427	0.218	0.237	0.266	0.323	0.277	0.212	0.243	0.26	0.216	0.235
	20.33	0.27	0.192	0.189	0.295	0.225	0.134	0.215	0.18	0.183	0.441	0.214	0.237	0.242	0.286	0.275	0.209	0.241	0.254	0.202	0.205
	20.42	0.248	0.192	0.292	0.257	0.276	0.196	0.215	0.173	0.202	0.379	0.212	0.221	0.24	0.279	0.261	0.206	0.308	0.202	0.207	0.208
	20.5	0.269	0.186	0.281	0.265	0.276	0.148	0.211	0.181	0.214	0.307	0.214	0.234	0.219	0.282	0.238	0.2	0.298	0.223	0.237	0.222
	20.58	0.229	0.193	0.264	0.255	0.267	0.131	0.195	0.202	0.277	0.312	0.202	0.241	0.224	0.251	0.342	0.192	0.308	0.236	0.25	0.288
	20.67	0.244	0.201	0.317	0.261	0.38	0.132	0.216	0.152	0.263	0.306	0.206	0.289	0.212	0.251	0.353	0.189	0.326	0.202	0.392	0.46
	20.75	0.241	0.239	0.34	0.256	0.319	0.157	0.245	0.163	0.377	0.286	0.232	0.283	0.215	0.208	0.33	0.188	0.329	0.229	0.358	0.374
	20.83	0.308	0.209	0.332	0.269	0.338	0.162	0.277	0.164	0.28	0.226	0.296	0.185	0.201	0.147	0.333	0.17	0.308	0.241	0.278	0.294
	20.92	0.27	0.216	0.291	0.264	0.376	0.153	0.295	0.178	0.343	0.22	0.279	0.192	0.205	0.193	0.342	0.187	0.297	0.265	0.272	0.284
	21	0.264	0.217	0.302	0.275	0.325	0.149	0.37	0.169	0.272	0.232	0.307	0.235	0.214	0.232	0.296	0.207	0.269	0.357	0.265	0.283
	21.08	0.252	0.189	0.285	0.246	0.279	0.126	0.355	0.165	0.376	0.218	0.318	0.247	0.212	0.226	0.294	0.244	0.248	0.269	0.259	0.273
	21.17	0.24	0.199	0.282	0.295	0.288	0.144	0.357	0.161	0.301	0.221	0.307	0.239	0.267	0.205	0.238	0.249	0.256	0.23	0.25	0.291
	21.25	0.228	0.186	0.245	0.279	0.248	0.14	0.23	0.206	0.227	0.203	0.317	0.24	0.262	0.218	0.232	0.178	0.238	0.234	0.25	0.267
	21.33	0.245	0.192	0.249	0.271	0.239	0.141	0.229	0.219	0.272	0.205	0.307	0.271	0.332	0.267	0.238	0.177	0.228	0.239	0.236	0.263
	21.42	0.231	0.178	0.241	0.28	0.228	0.138	0.226	0.264	0.254	0.202	0.275	0.281	0.328	0.247	0.228	0.17	0.233	0.237	0.224	0.273
	21.5	0.252	0.176	0.241	0.328	0.247	0.238	0.224	0.224	0.262	0.216	0.255	0.252	0.341	0.232	0.229	0.167	0.228	0.23	0.208	0.395
	21.58	0.235	0.182	0.214	0.296	0.215	0.277	0.228	0.168	0.22	0.291	0.221	0.213	0.326	0.233	0.224	0.181	0.226	0.228	0.208	0.364
	21.67	0.215	0.18	0.235	0.322	0.205	0.261	0.226	0.159	0.185	0.294	0.228	0.209	0.246	0.27	0.213	0.225	0.206	0.227	0.203	0.303
	21.75	0.213	0.173	0.232	0.321	0.218	0.311	0.213	0.199	0.211	0.322	0.225	0.212	0.238	0.266	0.234	0.228	0.221	0.219	0.189	0.303
	21.83	0.201	0.182	0.22	0.327	0.202	0.323	0.211	0.213	0.207	0.343	0.194	0.226	0.219	0.318	0.211	0.185	0.296	0.21	0.186	0.286
	21.92	0.222	0.156	0.27	0.307	0.214	0.323	0.187	0.2	0.193	0.337	0.206	0.261	0.226	0.386	0.233	0.237	0.288	0.209	0.199	0.317
	22	0.244	0.149	0.367	0.299	0.251	0.322	0.247	0.166	0.176	0.317	0.202	0.268	0.214	0.323	0.279	0.351	0.294	0.243	0.184	0.244
	22.08	0.248	0.167	0.318	0.258	0.301	0.292	0.333	0.173	0.18	0.266	0.215	0.284	0.205	0.292	0.311	0.336	0.351	0.257	0.205	0.237
	22.17	0.234	0.163	0.31	0.244	0.286	0.335	0.374	0.151	0.157	0.237	0.204	0.484	0.211	0.376	0.258	0.231	0.298	0.244	0.199	0.219
	22.25	0.202	0.177	0.277	0.232	0.222	0.301	0.253	0.159	0.18	0.226	0.206	0.465	0.214	0.319	0.375	0.211	0.308	0.236	0.199	0.233
	22.33	0.197	0.165	0.306	0.231	0.245	0.271	0.232	0.149	0.179	0.214	0.193	0.3	0.203	0.27	0.34	0.202	0.246	0.225	0.173	0.244
	22.42	0.195	0.168	0.321	0.21	0.22	0.383	0.243	0.143	0.175	0.204	0.208	0.283	0.206	0.288	0.308	0.202	0.282	0.25	0.202	0.242
	22.5	0.205	0.202	0.32	0.252	0.219	0.371	0.25	0.15	0.139	0.213	0.274	0.301	0.202	0.237	0.255	0.171	0.23	0.239	0.267	0.242
	22.58	0.197	0.269	0.266	0.242	0.208	0.41	0.219	0.148	0.143	0.194	0.266	0.265	0.199	0.138	0.293	0.21	0.247	0.235	0.296	0.248
	22.67	0.19	0.302	0.272	0.243	0.206	0.362	0.232	0.127	0.148	0.205	0.265	0.245	0.288	0.153	0.259	0.185	0.232	0.215	0.329	0.352
	22.75	0.211	0.326	0.258	0.215	0.208	0.307	0.236	0.148	0.196	0.194	0.259	0.263	0.267	0.152	0.283	0.178	0.251	0.237	0.334	0.326
	22.83	0.25	0.273	0.26	0.253	0.21	0.303	0.235	0.147	0.181	0.212	0.306	0.263	0.374	0.226	0.237	0.191	0.199	0.247	0.312	0.29
	22.92	0.315	0.308	0.249	0.296	0.234	0.369	0.23	0.202	0.221	0.274	0.282	0.251	0.404	0.28	0.278	0.172	0.228	0.24	0.305	0.332
	23	0.301	0.322	0.3	0.294	0.294	0.39	0.234	0.2	0.343	0.284	0.254	0.214	0.385	0.306	0.255	0.203	0.271	0.284	0.271	0.316
	23.08	0.292	0.372	0.321	0.316	0.377	0.349	0.225	0.22	0.178	0.318	0.24	0.218	0.35	0.32	0.245	0.221	0.214	0.3	0.255	0.283
	23.17	0.33	0.288	0.295	0.273	0.327	0.251	0.207	0.182	0.172	0.273	0.209	0.223	0.25	0.227	0.213	0.23	0.214	0.256	0.256	0.269
	23.25	0.254	0.246	0.261	0.268	0.334	0.262	0.185	0.314	0.17	0.239	0.135	0.233	0.236	0.242	0.302	0.212	0.227	0.247	0.25	0.252
	23.33	0.238	0.233	0.262	0.245	0.364	0.253	0.179	0.298	0.183	0.232	0.138	0.221	0.215	0.218	0.244	0.191	0.293	0.196	0.217	0.233
	23.42	0.237	0.196	0.243	0.207	0.368	0.216	0.306	0.281	0.162	0.201	0.163	0.201	0.246	0.221	0.228	0.19	0.289	0.193	0.22	0.227
	23.5	0.221	0.208	0.237	0.205	0.4	0.2	0.309	0.247	0.166	0.199	0.168	0.209	0.227	0.187	0.247	0.161	0.309	0.181	0.208	0.223
	23.58	0.211	0.176	0.215	0.209	0.317	0.221	0.219	0.267	0.165	0.191	0.153	0.212	0.234	0.201	0.273	0.178	0.287	0.194	0.205	0.216
	23.67	0.191	0.17	0.26	0.206	0.289	0.226	0.251	0.214	0.156	0.197	0.169	0.236	0.193	0.275	0.247	0.167	0.265	0.183	0.201	0.237
	23.75	0.203	0.168	0.298	0.178	0.263	0.192	0.241	0.181	0.185	0.192	0.173	0.261	0.201	0.266	0.25	0.164	0.252	0.185	0.198	0.226
	23.83	0.201	0.167	0.293	0.215	0.261	0.186	0.243	0.176	0.162	0.186	0.211	0.304	0.203	0.264	0.216	0.155	0.252	0.196	0.184	0.19
	23.92	0.193	0.177	0.302	0.213	0.227	0.18	0.219	0.151	0.161	0.236	0.185	0.337	0.218	0.377	0.229	0.168	0.244	0.192	0.196	0.206
	24	0.181	0.164	0.275	0.206	0.237	0.183	0.231	0.142	0.208	0.223	0.238	0.311	0.205	0.247	0.245	0.176	0.238	0.163	0.197	0.191
	24.08	0.27	0.138	0.252	0.187	0.207	0.164	0.214	0.159	0.283	0.197	0.216	0.262	0.183	0.245	0.256	0.174	0.249	0.181	0.206	0.192
	24.17	0.314	0.168	0.255	0.193	0.226	0.168	0.213	0.162	0.268	0.198	0.188	0.252	0.168	0.213	0.231	0.158	0.241	0.169	0.199	0.186
	24.25	0.3	0.223	0.235	0.209	0.198	0.26	0.199	0.149	0.185	0.186	0.169	0.236	0.165	0.233	0.322	0.175	0.227	0.165	0.203	0.209
	24.33	0.274	0.219	0.23	0.2	0.204	0.277	0.196	0.135	0.257	0.186	0.206	0.229	0.225	0.225	0.268	0.159	0.252	0.158	0.215	0.244
	24.42	0.236	0.222	0.314	0.189	0.192	0.239	0.205	0.147	0.276	0.271	0.282	0.216	0.282	0.243	0.266	0.17	0.236	0.273	0.267	0.235
	24.5	0.218	0.227	0.32	0.192	0.203	0.216	0.204	0.229	0.228	0.286	0.245	0.211	0.285	0.265	0.238	0.245	0.247	0.238	0.243	0.318
	24.58	0.205	0.198	0.26	0.264	0.176	0.267	0.233	0.241	0.165	0.309	0.229	0.222	0.306	0.274	0.239	0.316	0.236	0.23	0.246	0.327
	24.67	0.212	0.201	0.264	0.255	0.204	0.266	0.248	0.207	0.167	0.309	0.366	0.222	0.305	0.24	0.233	0.264	0.239	0.292	0.212	0.337
	24.75	0.21	0.13	0.226	0.313	0.243	0.223	0.245	0.234	0.163	0.289	0.209	0.205	0.287	0.214	0.235	0.291	0.248	0.322	0.208	0.333
	24.83	0.201	0.141	0.232	0.344	0.259	0.233	0.233	0.266	0.148	0.27	0.172	0.202	0.351	0.164	0.205	0.22	0.24	0.307	0.237	0.249
	24.92	0.2	0.131	0.17	0.312	0.23	0.207	0.201	0.244	0.154	0.24	0.176	0.215	0.331	0.178	0.233	0.207	0.222	0.317	0.246	0.244
	25	0.206	0.135	0.256	0.302	0.196	0.21	0.217	0.207	0.168	0.249	0.242	0.197	0.353	0.241	0.208	0.208	0.191	0.305	0.225	0.226
	25.08	0.197	0.151	0.219	0.252	0.199	0.181	0.308	0.172	0.231	0.212	0.233	0.195	0.315	0.256	0.224	0.198	0.228	0.272	0.186	0.232
	25.17	0.2	0.245	0.222	0.255	0.195	0.168	0.307	0.164	0.197	0.199	0.202	0.215	0.265	0.279	0.195	0.178	0.294	0.22	0.177	0.2
	25.25	0.187	0.209	0.29	0.229	0.176	0.183	0.228	0.163	0.162	0.207	0.176	0.218	0.268	0.381	0.272	0.202	0.29	0.232	0.174	0.213
	25.33	0.17	0.2	0.331	0.229	0.184	0.182	0.239	0.141	0.179	0.195	0.184	0.213	0.218	0.326	0.269	0.193	0.219	0.213	0.213	0.217
	25.42	0.163	0.188	0.297	0.193	0.176	0.237	0.275	0.156	0.165	0.198	0.181	0.179	0.206	0.317	0.311	0.19	0.211	0.207	0.275	0.226
	25.5	0.171	0.18	0.297	0.212	0.192	0.249	0.276	0.152	0.138	0.2	0.17	0.199	0.191	0.268	0.306	0.182	0.232	0.228	0.302	0.239
	25.58	0.195	0.166	0.255	0.209	0.174	0.192	0.244	0.184	0.148	0.273	0.189	0.211	0.192	0.256	0.311	0.199	0.247	0.227	0.302	0.223
	25.67	0.184	0.156	0.245	0.186	0.233	0.199	0.236	0.154	0.147	0.316	0.186	0.193	0.169	0.24	0.272	0.187	0.227	0.241	0.315	0.214
	25.75	0.176	0.137	0.23	0.222	0.272	0.206	0.23	0.167	0.161	0.311	0.17	0.185	0.166	0.242	0.286	0.185	0.317	0.243	0.269	0.206
	25.83	0.171	0.194	0.224	0.228	0.293	0.19	0.228	0.15	0.14	0.317	0.169	0.197	0.174	0.22	0.247	0.164	0.303	0.222	0.213	0.183
	25.92	0.148	0.174	0.226	0.25	0.28	0.179	0.258	0.158	0.128	0.305	0.154	0.238	0.179	0.205	0.261	0.176	0.292	0.212	0.216	0.185
	26	0.149	0.185	0.237	0.262	0.308	0.176	0.238	0.132	0.155	0.311	0.175	0.287	0.167	0.215	0.248	0.175	0.252	0.185	0.187	0.186
	26.08	0.156	0.164	0.253	0.206	0.358	0.178	0.228	0.178	0.139	0.284	0.243	0.309	0.25	0.223	0.231	0.18	0.242	0.203	0.191	0.2
	26.17	0.172	0.161	0.253	0.217	0.362	0.174	0.221	0.201	0.129	0.26	0.267	0.4	0.323	0.231	0.272	0.214	0.215	0.179	0.189	0.192
	26.25	0.162	0.157	0.3	0.203	0.273	0.172	0.206	0.175	0.142	0.243	0.244	0.33	0.341	0.317	0.325	0.214	0.239	0.18	0.186	0.208
	26.33	0.161	0.157	0.329	0.195	0.245	0.17	0.224	0.134	0.16	0.236	0.269	0.407	0.308	0.26	0.302	0.199	0.218	0.153	0.171	0.18
	26.42	0.183	0.145	0.273	0.191	0.224	0.193	0.317	0.24	0.163	0.227	0.361	0.321	0.26	0.243	0.29	0.192	0.225	0.181	0.173	0.195
	26.5	0.256	0.152	0.269	0.195	0.22	0.19	0.329	0.277	0.146	0.226	0.317	0.533	0.239	0.232	0.233	0.164	0.227	0.197	0.166	0.263
	26.58	0.291	0.177	0.259	0.183	0.192	0.193	0.242	0.199	0.203	0.236	0.285	0.305	0.246	0.262	0.227	0.174	0.241	0.237	0.167	0.42
	26.67	0.268	0.166	0.261	0.189	0.217	0.196	0.332	0.205	0.242	0.232	0.251	0.277	0.224	0.236	0.209	0.178	0.226	0.262	0.169	0.353
	26.75	0.342	0.149	0.235	0.168	0.283	0.169	0.345	0.272	0.244	0.216	0.231	0.259	0.23	0.243	0.234	0.171	0.253	0.268	0.166	0.33
	26.83	0.31	0.143	0.233	0.181	0.286	0.169	0.348	0.282	0.251	0.265	0.213	0.253	0.225	0.138	0.28	0.152	0.281	0.338	0.205	0.371
	26.92	0.259	0.172	0.218	0.181	0.247	0.165	0.272	0.308	0.256	0.255	0.197	0.237	0.227	0.234	0.284	0.165	0.284	0.361	0.195	0.354
	27	0.225	0.159	0.214	0.177	0.312	0.184	0.269	0.323	0.18	0.256	0.182	0.228	0.218	0.298	0.278	0.165	0.352	0.408	0.195	0.353
	27.08	0.322	0.138	0.21	0.263	0.277	0.208	0.264	0.258	0.168	0.304	0.181	0.23	0.228	0.292	0.266	0.158	0.236	0.415	0.178	0.347
	27.17	0.251	0.152	0.205	0.275	0.278	0.185	0.257	0.219	0.157	0.353	0.175	0.215	0.221	0.375	0.188	0.182	0.222	0.386	0.189	0.272
	27.25	0.236	0.303	0.262	0.31	0.254	0.186	0.201	0.189	0.154	0.377	0.163	0.245	0.235	0.519	0.207	0.169	0.224	0.443	0.182	0.257
	27.33	0.201	0.266	0.267	0.327	0.26	0.233	0.205	0.185	0.145	0.385	0.18	0.207	0.195	0.354	0.202	0.171	0.226	0.322	0.163	0.282
	27.42	0.199	0.283	0.254	0.272	0.237	0.261	0.216	0.197	0.138	0.337	0.174	0.209	0.204	0.331	0.229	0.172	0.229	0.287	0.168	0.268
	27.5	0.187	0.269	0.247	0.249	0.227	0.249	0.209	0.195	0.129	0.291	0.172	0.22	0.292	0.411	0.202	0.146	0.231	0.239	0.168	0.252
	27.58	0.191	0.327	0.25	0.298	0.207	0.233	0.239	0.185	0.136	0.271	0.204	0.212	0.328	0.371	0.202	0.159	0.205	0.225	0.157	0.25
	27.67	0.192	0.298	0.333	0.271	0.213	0.227	0.232	0.177	0.154	0.263	0.202	0.222	0.289	0.245	0.226	0.174	0.209	0.161	0.15	0.224
	27.75	0.175	0.347	0.292	0.237	0.21	0.265	0.232	0.286	0.165	0.23	0.208	0.21	0.348	0.231	0.238	0.172	0.194	0.183	0.256	0.218
	27.83	0.338	0.324	0.289	0.238	0.205	0.254	0.223	0.335	0.154	0.227	0.197	0.33	0.462	0.216	0.223	0.223	0.196	0.212	0.262	0.197
	27.92	0.356	0.289	0.242	0.255	0.19	0.256	0.224	0.25	0.136	0.216	0.177	0.397	0.447	0.189	0.23	0.313	0.219	0.197	0.269	0.191
	28	0.347	0.316	0.262	0.256	0.202	0.255	0.276	0.189	0.14	0.219	0.188	0.31	0.366	0.267	0.208	0.296	0.253	0.175	0.39	0.206
	28.08	0.281	0.429	0.243	0.215	0.196	0.216	0.298	0.304	0.212	0.209	0.242	0.34	0.32	0.317	0.253	0.31	0.266	0.171	0.372	0.203
	28.17	0.32	0.354	0.235	0.245	0.227	0.208	0.34	0.291	0.211	0.197	0.303	0.378	0.296	0.29	0.229	0.246	0.296	0.242	0.266	0.186
	28.25	0.302	0.31	0.221	0.247	0.263	0.258	0.267	0.236	0.309	0.199	0.28	0.415	0.302	0.291	0.259	0.25	0.279	0.251	0.279	0.207
	28.33	0.286	0.29	0.229	0.232	0.355	0.259	0.273	0.182	0.394	0.203	0.249	0.362	0.266	0.273	0.337	0.216	0.353	0.275	0.372	0.385
	28.42	0.26	0.237	0.21	0.3	0.267	0.23	0.24	0.286	0.386	0.2	0.255	0.355	0.252	0.266	0.33	0.222	0.32	0.298	0.334	0.316
	28.5	0.247	0.229	0.213	0.271	0.254	0.204	0.241	0.253	0.34	0.201	0.251	0.319	0.224	0.258	0.351	0.187	0.276	0.246	0.311	0.296
	28.58	0.233	0.189	0.323	0.331	0.225	0.197	0.211	0.204	0.266	0.234	0.238	0.37	0.252	0.249	0.317	0.189	0.295	0.218	0.311	0.301
	28.67	0.229	0.197	0.281	0.332	0.213	0.203	0.242	0.183	0.241	0.25	0.239	0.353	0.273	0.226	0.275	0.185	0.237	0.237	0.184	0.269
	28.75	0.348	0.179	0.244	0.284	0.192	0.18	0.246	0.209	0.286	0.303	0.239	0.314	0.255	0.241	0.277	0.19	0.252	0.24	0.21	0.282
	28.83	0.285	0.181	0.234	0.292	0.188	0.149	0.247	0.153	0.226	0.29	0.246	0.277	0.228	0.24	0.236	0.202	0.209	0.238	0.201	0.275
	28.92	0.264	0.182	0.319	0.291	0.173	0.204	0.317	0.176	0.213	0.234	0.213	0.283	0.239	0.24	0.239	0.212	0.192	0.24	0.212	0.262
	29	0.26	0.229	0.295	0.286	0.193	0.208	0.282	0.171	0.196	0.218	0.228	0.381	0.234	0.209	0.317	0.194	0.213	0.226	0.209	0.252
	29.08	0.266	0.281	0.316	0.263	0.201	0.193	0.271	0.211	0.188	0.213	0.216	0.398	0.236	0.194	0.341	0.192	0.287	0.228	0.208	0.252
	29.17	0.257	0.318	0.299	0.335	0.192	0.25	0.259	0.213	0.169	0.197	0.286	0.359	0.23	0.175	0.279	0.169	0.409	0.263	0.223	0.23
	29.25	0.238	0.248	0.262	0.336	0.278	0.225	0.227	0.208	0.165	0.23	0.338	0.414	0.215	0.187	0.332	0.183	0.428	0.264	0.216	0.235
	29.33	0.228	0.242	0.264	0.357	0.371	0.237	0.218	0.177	0.164	0.218	0.27	0.4	0.211	0.204	0.303	0.191	0.35	0.235	0.225	0.231
	29.42	0.264	0.404	0.291	0.269	0.308	0.281	0.247	0.23	0.167	0.201	0.264	0.338	0.179	0.215	0.277	0.192	0.319	0.239	0.281	0.239
	29.5	0.387	0.345	0.294	0.276	0.326	0.258	0.255	0.291	0.147	0.298	0.312	0.325	0.259	0.234	0.237	0.192	0.287	0.234	0.286	0.218
	29.58	0.303	0.287	0.295	0.255	0.345	0.24	0.239	0.254	0.148	0.357	0.274	0.293	0.297	0.318	0.272	0.252	0.3	0.231	0.284	0.228
	29.67	0.303	0.339	0.371	0.275	0.428	0.239	0.242	0.327	0.176	0.401	0.244	0.304	0.344	0.324	0.275	0.275	0.279	0.209	0.236	0.303
	29.75	0.294	0.263	0.384	0.252	0.372	0.205	0.218	0.329	0.178	0.329	0.27	0.282	0.234	0.369	0.295	0.283	0.155	0.218	0.253	0.317
	29.83	0.304	0.251	0.396	0.284	0.35	0.316	0.219	0.273	0.144	0.296	0.3	0.3	0.256	0.341	0.311	0.214	0.206	0.227	0.247	0.481
	29.92	0.279	0.239	0.348	0.248	0.292	0.304	0.197	0.242	0.18	0.334	0.272	0.308	0.256	0.293	0.328	0.202	0.213	0.209	0.246	0.351
	30	0.265	0.247	0.3	0.248	0.284	0.321	0.202	0.228	0.209	0.334	0.302	0.447	0.294	0.249	0.282	0.191	0.307	0.225	0.297	0.362
	30.08	0.353	0.28	0.329	0.325	0.269	0.247	0.333	0.222	0.238	0.292	0.292	0.466	0.305	0.256	0.287	0.201	0.342	0.307	0.357	0.365
	30.17	0.316	0.351	0.328	0.33	0.265	0.219	0.27	0.219	0.19	0.265	0.254	0.335	0.314	0.279	0.258	0.172	0.407	0.361	0.319	0.377
	30.25	0.313	0.271	0.335	0.37	0.23	0.217	0.232	0.216	0.225	0.249	0.291	0.284	0.359	0.227	0.285	0.229	0.458	0.369	0.317	0.319
	30.33	0.287	0.329	0.32	0.418	0.249	0.217	0.253	0.211	0.29	0.263	0.282	0.281	0.437	0.305	0.324	0.357	0.37	0.379	0.328	0.452
	30.42	0.341	0.295	0.329	0.367	0.273	0.243	0.253	0.246	0.284	0.289	0.328	0.488	0.505	0.29	0.398	0.353	0.524	0.368	0.411	0.427
	30.5	0.402	0.353	0.321	0.373	0.276	0.238	0.248	0.355	0.233	0.365	0.498	0.388	0.386	0.363	0.288	0.269	0.481	0.356	0.328	0.309
	30.58	0.373	0.383	0.296	0.394	0.327	0.24	0.331	0.335	0.26	0.367	0.46	0.348	0.373	0.408	0.403	0.312	0.489	0.356	0.34	0.445
	30.67	0.359	0.366	0.358	0.387	0.438	0.22	0.423	0.296	0.383	0.343	0.435	0.495	0.402	0.332	0.382	0.47	0.325	0.412	0.369	0.5
	30.75	0.42	0.421	0.358	0.36	0.455	0.328	0.397	0.269	0.373	0.534	0.434	0.495	0.405	0.33	0.366	0.417	0.352	0.498	0.452	0.547
	30.83	0.365	0.343	0.337	0.407	0.396	0.35	0.38	0.252	0.35	0.583	0.455	0.544	0.564	0.303	0.389	0.332	0.58	0.445	0.409	0.579
	30.92	0.386	0.388	0.438	0.457	0.418	0.275	0.461	0.291	0.244	0.448	0.441	0.466	0.583	0.404	0.348	0.308	0.562	0.418	0.355	0.577
	31	0.383	0.359	0.431	0.483	0.472	0.276	0.329	0.287	0.359	0.468	0.492	0.444	0.33	0.43	0.374	0.376	0.534	0.392	0.431	0.426
	31.08	0.444	0.382	0.459	0.458	0.578	0.327	0.49	0.329	0.391	0.582	0.567	0.481	0.344	0.385	0.363	0.366	0.529	0.377	0.47	0.468
	31.17	0.478	0.348	0.463	0.361	0.546	0.306	0.478	0.338	0.296	0.663	0.492	0.461	0.493	0.369	0.312	0.313	0.461	0.396	0.534	0.545
	31.25	0.408	0.422	0.509	0.397	0.457	0.361	0.454	0.389	0.394	0.477	0.46	0.528	0.517	0.334	0.475	0.426	0.504	0.419	0.55	0.66
	31.33	0.491	0.381	0.526	0.399	0.497	0.347	0.468	0.323	0.35	0.47	0.448	0.386	0.42	0.375	0.279	0.454	0.295	0.303	0.436	0.682
	31.42	0.487	0.422	0.505	0.396	0.399	0.232	0.455	0.356	0.287	0.38	0.425	0.395	0.4	0.35	0.308	0.481	0.432	0.347	0.518	0.72
	31.5	0.38	0.296	0.484	0.385	0.397	0.28	0.436	0.418	0.24	0.559	0.409	0.416	0.435	0.393	0.295	0.384	0.455	0.341	0.508	0.45
	31.58	0.513	0.314	0.493	0.383	0.416	0.403	0.479	0.466	0.26	0.426	0.428	0.507	0.397	0.374	0.357	0.357	0.452	0.331	0.504	0.537
	31.67	0.468	0.334	0.428	0.399	0.446	0.375	0.491	0.383	0.313	0.398	0.432	0.424	0.306	0.499	0.439	0.304	0.383	0.343	0.472	0.641
	31.75	0.381	0.412	0.413	0.371	0.465	0.29	0.498	0.316	0.388	0.596	0.343	0.371	0.384	0.47	0.4	0.282	0.349	0.425	0.426	0.602
	31.83	0.377	0.429	0.43	0.363	0.442	0.259	0.479	0.341	0.315	0.617	0.358	0.518	0.37	0.513	0.464	0.327	0.42	0.472	0.512	0.635
	31.92	0.402	0.358	0.401	0.369	0.459	0.238	0.417	0.356	0.307	0.623	0.516	0.462	0.362	0.458	0.487	0.321	0.441	0.506	0.467	0.577
	32	0.38	0.335	0.388	0.409	0.51	0.251	0.464	0.4	0.354	0.663	0.521	0.564	0.378	0.414	0.433	0.385	0.476	0.458	0.351	0.467
	32.08	0.402	0.496	0.415	0.406	0.544	0.204	0.459	0.405	0.363	0.582	0.41	0.559	0.532	0.377	0.415	0.392	0.556	0.466	0.372	0.491
	32.17	0.354	0.512	0.418	0.409	0.566	0.213	0.509	0.476	0.372	0.547	0.485	0.532	0.368	0.377	0.335	0.441	0.494	0.502	0.484	0.575
	32.25	0.37	0.498	0.392	0.394	0.458	0.294	0.466	0.391	0.415	0.613	0.308	0.546	0.344	0.478	0.441	0.473	0.534	0.517	0.469	0.56
	32.33	0.378	0.545	0.426	0.376	0.52	0.323	0.463	0.359	0.452	0.635	0.354	0.475	0.375	0.422	0.327	0.47	0.494	0.397	0.451	0.624
	32.42	0.385	0.406	0.479	0.409	0.558	0.351	0.544	0.403	0.411	0.673	0.302	0.425	0.426	0.441	0.308	0.51	0.429	0.438	0.411	0.637
	32.5	0.449	0.443	0.485	0.381	0.602	0.364	0.548	0.336	0.385	0.725	0.508	0.412	0.458	0.596	0.29	0.394	0.563	0.526	0.459	0.627
	32.58	0.353	0.404	0.498	0.446	0.578	0.259	0.454	0.356	0.389	0.647	0.542	0.354	0.474	0.647	0.403	0.499	0.56	0.523	0.497	0.705
	32.67	0.396	0.371	0.473	0.471	0.471	0.257	0.38	0.276	0.359	0.616	0.437	0.341	0.528	0.572	0.36	0.509	0.681	0.458	0.481	0.605
	32.75	0.485	0.382	0.45	0.467	0.423	0.326	0.348	0.276	0.298	0.52	0.497	0.324	0.51	0.631	0.346	0.479	0.493	0.449	0.485	0.674
	32.83	0.472	0.446	0.438	0.471	0.398	0.346	0.354	0.236	0.286	0.627	0.625	0.385	0.492	0.439	0.428	0.576	0.475	0.423	0.574	0.463
	32.92	0.37	0.537	0.445	0.406	0.345	0.25	0.306	0.234	0.251	0.664	0.518	0.473	0.49	0.305	0.322	0.545	0.441	0.426	0.549	0.379
	33	0.339	0.545	0.474	0.375	0.435	0.239	0.524	0.195	0.237	0.66	0.511	0.538	0.481	0.39	0.348	0.499	0.532	0.453	0.388	0.356
	33.08	0.344	0.407	0.447	0.339	0.37	0.34	0.469	0.161	0.215	0.721	0.515	0.509	0.481	0.428	0.356	0.469	0.511	0.355	0.364	0.356
	33.17	0.441	0.385	0.432	0.38	0.373	0.353	0.404	0.284	0.223	0.672	0.39	0.523	0.454	0.441	0.405	0.283	0.516	0.372	0.368	0.516
	33.25	0.388	0.409	0.392	0.345	0.345	0.349	0.535	0.232	0.269	0.627	0.427	0.452	0.485	0.449	0.53	0.306	0.565	0.386	0.406	0.457
	33.33	0.407	0.43	0.367	0.395	0.395	0.33	0.473	0.222	0.249	0.643	0.343	0.459	0.453	0.447	0.431	0.289	0.478	0.303	0.353	0.478
	33.42	0.468	0.61	0.33	0.352	0.532	0.41	0.475	0.209	0.28	0.628	0.52	0.424	0.447	0.474	0.422	0.289	0.551	0.408	0.443	0.505
	33.5	0.32	0.557	0.326	0.38	0.539	0.33	0.432	0.234	0.221	0.684	0.476	0.389	0.509	0.608	0.461	0.46	0.448	0.436	0.548	0.505
	33.58	0.433	0.441	0.319	0.464	0.477	0.352	0.481	0.229	0.35	0.666	0.398	0.446	0.448	0.685	0.363	0.369	0.461	0.492	0.471	0.634
	33.67	0.417	0.465	0.343	0.473	0.496	0.362	0.449	0.236	0.414	0.646	0.341	0.406	0.44	0.678	0.324	0.4	0.481	0.499	0.369	0.616
	33.75	0.451	0.373	0.314	0.525	0.583	0.252	0.353	0.307	0.454	0.655	0.415	0.406	0.481	0.713	0.312	0.417	0.602	0.516	0.446	0.643
	33.83	0.519	0.375	0.325	0.456	0.553	0.258	0.38	0.347	0.432	0.516	0.474	0.359	0.494	0.684	0.353	0.521	0.526	0.419	0.565	0.593
	33.92	0.422	0.353	0.31	0.457	0.444	0.296	0.403	0.469	0.383	0.507	0.408	0.464	0.402	0.502	0.365	0.508	0.54	0.419	0.544	0.476
	34	0.4	0.38	0.35	0.462	0.406	0.347	0.394	0.377	0.251	0.502	0.607	0.496	0.45	0.682	0.379	0.425	0.549	0.334	0.465	0.54
	34.08	0.404	0.345	0.32	0.383	0.469	0.327	0.353	0.386	0.352	0.458	0.667	0.439	0.531	0.609	0.378	0.403	0.626	0.346	0.461	0.6
	34.17	0.336	0.363	0.348	0.368	0.499	0.412	0.357	0.342	0.376	0.535	0.438	0.445	0.613	0.681	0.33	0.515	0.678	0.333	0.473	0.589
	34.25	0.485	0.354	0.401	0.408	0.39	0.257	0.316	0.398	0.446	0.584	0.514	0.453	0.619	0.669	0.326	0.366	0.659	0.339	0.479	0.606
	34.33	0.468	0.37	0.386	0.444	0.372	0.253	0.278	0.363	0.388	0.567	0.58	0.48	0.669	0.63	0.39	0.57	0.488	0.263	0.399	0.47
	34.42	0.371	0.321	0.357	0.414	0.41	0.279	0.287	0.397	0.377	0.605	0.537	0.454	0.622	0.638	0.434	0.557	0.53	0.356	0.456	0.484
	34.5	0.323	0.326	0.352	0.389	0.399	0.364	0.301	0.34	0.331	0.678	0.581	0.459	0.498	0.512	0.425	0.415	0.543	0.333	0.528	0.628
	34.58	0.327	0.322	0.274	0.387	0.404	0.395	0.341	0.304	0.42	0.645	0.574	0.426	0.579	0.563	0.42	0.36	0.564	0.346	0.532	0.602
	34.67	0.444	0.341	0.358	0.418	0.413	0.393	0.325	0.271	0.372	0.658	0.649	0.36	0.559	0.575	0.46	0.53	0.498	0.305	0.525	0.655
	34.75	0.527	0.307	0.362	0.371	0.347	0.362	0.298	0.337	0.282	0.674	0.487	0.421	0.585	0.599	0.423	0.499	0.509	0.324	0.473	0.62
	34.83	0.404	0.446	0.374	0.396	0.352	0.388	0.319	0.3	0.273	0.692	0.495	0.565	0.626	0.594	0.443	0.488	0.434	0.388	0.491	0.475
	34.92	0.411	0.52	0.326	0.423	0.329	0.369	0.304	0.328	0.381	0.525	0.462	0.48	0.611	0.696	0.518	0.466	0.436	0.381	0.467	0.579
	35	0.448	0.482	0.466	0.412	0.37	0.37	0.291	0.3	0.442	0.522	0.537	0.524	0.64	0.569	0.361	0.465	0.442	0.289	0.519	0.553
	35.08	0.471	0.463	0.269	0.483	0.35	0.318	0.353	0.285	0.373	0.48	0.426	0.502	0.554	0.641	0.373	0.47	0.42	0.358	0.386	0.528
	35.17	0.554	0.492	0.312	0.485	0.344	0.298	0.362	0.263	0.343	0.455	0.369	0.478	0.439	0.724	0.336	0.492	0.408	0.439	0.313	0.436
	35.25	0.48	0.519	0.382	0.517	0.414	0.273	0.337	0.245	0.331	0.44	0.395	0.407	0.382	0.596	0.346	0.502	0.418	0.431	0.316	0.339
	35.33	0.545	0.514	0.356	0.474	0.497	0.26	0.305	0.192	0.292	0.468	0.448	0.472	0.529	0.621	0.486	0.478	0.376	0.422	0.313	0.337
	35.42	0.437	0.567	0.393	0.5	0.389	0.217	0.425	0.195	0.25	0.547	0.408	0.492	0.511	0.561	0.474	0.473	0.424	0.485	0.361	0.332
	35.5	0.422	0.628	0.416	0.416	0.441	0.239	0.456	0.227	0.324	0.589	0.491	0.39	0.446	0.433	0.389	0.49	0.354	0.404	0.336	0.41
	35.58	0.485	0.47	0.365	0.408	0.488	0.34	0.416	0.28	0.352	0.657	0.425	0.357	0.438	0.516	0.422	0.513	0.342	0.426	0.326	0.404
	35.67	0.442	0.539	0.433	0.417	0.502	0.261	0.488	0.25	0.339	0.644	0.491	0.32	0.401	0.631	0.375	0.357	0.317	0.482	0.268	0.337
	35.75	0.382	0.566	0.518	0.42	0.511	0.349	0.442	0.198	0.374	0.652	0.578	0.323	0.384	0.639	0.337	0.367	0.321	0.483	0.375	0.343
	35.83	0.369	0.454	0.546	0.453	0.478	0.286	0.418	0.229	0.384	0.586	0.465	0.449	0.424	0.679	0.376	0.42	0.401	0.508	0.381	0.314
	35.92	0.398	0.366	0.569	0.405	0.521	0.292	0.454	0.263	0.409	0.616	0.475	0.402	0.434	0.625	0.453	0.459	0.353	0.496	0.378	0.36
	36	0.437	0.359	0.564	0.395	0.489	0.287	0.399	0.265	0.451	0.643	0.577	0.461	0.509	0.599	0.443	0.499	0.31	0.429	0.462	0.298
	36.08	0.428	0.411	0.534	0.402	0.43	0.234	0.358	0.337	0.466	0.481	0.567	0.535	0.553	0.613	0.447	0.569	0.485	0.46	0.398	0.265
	36.17	0.447	0.43	0.54	0.437	0.41	0.241	0.404	0.232	0.295	0.522	0.589	0.465	0.459	0.522	0.419	0.45	0.472	0.436	0.341	0.243
	36.25	0.364	0.401	0.557	0.461	0.315	0.214	0.282	0.309	0.344	0.594	0.565	0.401	0.446	0.381	0.481	0.405	0.483	0.455	0.361	0.282
	36.33	0.426	0.378	0.493	0.476	0.347	0.202	0.274	0.261	0.445	0.538	0.542	0.407	0.427	0.458	0.432	0.482	0.477	0.374	0.294	0.491
	36.42	0.508	0.373	0.478	0.542	0.382	0.179	0.257	0.231	0.358	0.584	0.429	0.346	0.377	0.467	0.471	0.508	0.582	0.339	0.363	0.529
	36.5	0.446	0.431	0.474	0.525	0.354	0.202	0.255	0.273	0.363	0.5	0.561	0.494	0.378	0.579	0.362	0.543	0.425	0.295	0.48	0.379
	36.58	0.409	0.376	0.433	0.505	0.321	0.204	0.347	0.364	0.359	0.591	0.372	0.445	0.378	0.696	0.334	0.45	0.438	0.33	0.44	0.451
	36.67	0.468	0.328	0.399	0.508	0.333	0.202	0.493	0.309	0.294	0.589	0.324	0.407	0.345	0.537	0.315	0.281	0.437	0.343	0.316	0.484
	36.75	0.574	0.494	0.356	0.465	0.326	0.21	0.445	0.341	0.259	0.466	0.473	0.363	0.372	0.591	0.335	0.252	0.475	0.384	0.328	0.466
	36.83	0.479	0.39	0.334	0.399	0.313	0.306	0.438	0.396	0.218	0.526	0.396	0.323	0.38	0.636	0.398	0.297	0.508	0.363	0.367	0.596
	36.92	0.493	0.522	0.294	0.409	0.329	0.358	0.524	0.391	0.232	0.566	0.288	0.384	0.39	0.609	0.346	0.374	0.477	0.374	0.376	0.56
	37	0.497	0.491	0.282	0.416	0.382	0.301	0.408	0.384	0.248	0.565	0.482	0.447	0.445	0.608	0.398	0.401	0.386	0.29	0.294	0.479
	37.08	0.435	0.565	0.317	0.38	0.34	0.239	0.407	0.366	0.303	0.592	0.365	0.315	0.524	0.63	0.359	0.412	0.449	0.28	0.382	0.504
	37.17	0.367	0.401	0.31	0.37	0.353	0.359	0.425	0.351	0.275	0.537	0.363	0.431	0.496	0.635	0.423	0.3	0.393	0.294	0.607	0.508
	37.25	0.328	0.363	0.264	0.354	0.462	0.354	0.376	0.322	0.429	0.494	0.362	0.397	0.499	0.505	0.416	0.4	0.372	0.295	0.461	0.414
	37.33	0.307	0.33	0.279	0.338	0.532	0.355	0.364	0.315	0.302	0.475	0.37	0.337	0.425	0.57	0.381	0.499	0.312	0.335	0.417	0.349
	37.42	0.29	0.327	0.28	0.376	0.446	0.384	0.376	0.274	0.404	0.342	0.399	0.321	0.434	0.631	0.38	0.493	0.344	0.419	0.475	0.339
	37.5	0.291	0.376	0.298	0.366	0.412	0.319	0.37	0.295	0.387	0.312	0.383	0.329	0.39	0.649	0.31	0.419	0.351	0.439	0.412	0.266
	37.58	0.31	0.347	0.321	0.328	0.457	0.316	0.283	0.324	0.398	0.296	0.371	0.355	0.422	0.675	0.408	0.326	0.321	0.469	0.458	0.304
	37.67	0.317	0.341	0.287	0.347	0.469	0.314	0.288	0.355	0.372	0.301	0.294	0.356	0.443	0.566	0.332	0.421	0.42	0.339	0.412	0.331
	37.75	0.486	0.38	0.333	0.327	0.508	0.251	0.28	0.318	0.465	0.266	0.405	0.302	0.391	0.63	0.311	0.428	0.467	0.283	0.479	0.34
	37.83	0.533	0.373	0.335	0.377	0.527	0.25	0.288	0.189	0.437	0.255	0.463	0.463	0.507	0.552	0.267	0.385	0.435	0.273	0.345	0.249
	37.92	0.33	0.326	0.325	0.375	0.54	0.266	0.368	0.204	0.374	0.253	0.432	0.407	0.614	0.48	0.3	0.327	0.5	0.269	0.327	0.269
	38	0.292	0.326	0.359	0.363	0.552	0.259	0.47	0.188	0.348	0.266	0.419	0.438	0.453	0.381	0.373	0.373	0.411	0.322	0.271	0.305
	38.08	0.3	0.29	0.414	0.322	0.476	0.224	0.301	0.222	0.318	0.238	0.494	0.439	0.494	0.376	0.346	0.385	0.427	0.307	0.313	0.284
	38.17	0.348	0.311	0.419	0.387	0.417	0.216	0.328	0.22	0.27	0.249	0.516	0.437	0.621	0.296	0.467	0.393	0.345	0.33	0.281	0.338
	38.25	0.334	0.42	0.411	0.412	0.323	0.208	0.318	0.219	0.265	0.237	0.515	0.391	0.623	0.337	0.427	0.351	0.335	0.346	0.315	0.345
	38.33	0.329	0.332	0.432	0.399	0.317	0.209	0.313	0.191	0.238	0.239	0.484	0.447	0.362	0.3	0.396	0.241	0.363	0.291	0.295	0.452
	38.42	0.393	0.29	0.397	0.46	0.37	0.179	0.303	0.187	0.264	0.282	0.523	0.469	0.377	0.306	0.382	0.271	0.356	0.271	0.314	0.503
	38.5	0.312	0.402	0.397	0.448	0.393	0.197	0.303	0.23	0.216	0.385	0.515	0.383	0.368	0.305	0.318	0.206	0.373	0.273	0.281	0.497
	38.58	0.465	0.412	0.333	0.433	0.327	0.191	0.27	0.249	0.23	0.322	0.485	0.355	0.362	0.373	0.356	0.208	0.359	0.296	0.3	0.457
	38.67	0.405	0.433	0.308	0.443	0.309	0.197	0.415	0.201	0.191	0.33	0.444	0.344	0.346	0.382	0.329	0.241	0.326	0.321	0.325	0.352
	38.75	0.355	0.385	0.275	0.358	0.285	0.204	0.259	0.276	0.213	0.315	0.491	0.331	0.481	0.361	0.355	0.251	0.318	0.254	0.403	0.368
	38.83	0.363	0.455	0.305	0.334	0.298	0.21	0.263	0.417	0.207	0.32	0.375	0.328	0.492	0.308	0.317	0.313	0.315	0.284	0.334	0.294
	38.92	0.436	0.514	0.307	0.408	0.296	0.204	0.302	0.324	0.186	0.324	0.351	0.315	0.477	0.252	0.364	0.379	0.3	0.277	0.329	0.309
	39	0.452	0.482	0.342	0.369	0.341	0.192	0.401	0.346	0.211	0.314	0.365	0.294	0.397	0.224	0.289	0.236	0.347	0.283	0.29	0.298
	39.08	0.336	0.419	0.297	0.363	0.31	0.279	0.333	0.334	0.195	0.286	0.368	0.267	0.37	0.25	0.292	0.215	0.421	0.325	0.363	0.272
	39.17	0.381	0.378	0.29	0.377	0.295	0.2	0.318	0.357	0.203	0.285	0.42	0.348	0.394	0.281	0.363	0.302	0.443	0.351	0.323	0.244
	39.25	0.309	0.328	0.213	0.338	0.263	0.242	0.264	0.38	0.145	0.258	0.394	0.382	0.383	0.428	0.325	0.241	0.407	0.355	0.334	0.283
	39.33	0.301	0.338	0.242	0.346	0.255	0.266	0.287	0.403	0.178	0.267	0.245	0.464	0.263	0.454	0.324	0.279	0.329	0.375	0.307	0.29
	39.42	0.314	0.296	0.332	0.366	0.266	0.301	0.339	0.442	0.184	0.23	0.3	0.441	0.336	0.542	0.34	0.298	0.348	0.412	0.34	0.261
	39.5	0.335	0.31	0.351	0.408	0.254	0.247	0.351	0.431	0.175	0.248	0.332	0.413	0.316	0.62	0.346	0.32	0.466	0.508	0.406	0.255
	39.58	0.28	0.284	0.404	0.372	0.305	0.262	0.443	0.381	0.188	0.236	0.335	0.323	0.316	0.603	0.395	0.378	0.431	0.455	0.384	0.327
	39.67	0.268	0.279	0.334	0.363	0.381	0.254	0.41	0.357	0.222	0.259	0.42	0.274	0.302	0.66	0.328	0.394	0.398	0.345	0.254	0.316
	39.75	0.362	0.259	0.417	0.382	0.36	0.207	0.298	0.408	0.278	0.233	0.284	0.254	0.318	0.55	0.328	0.449	0.508	0.327	0.301	0.298
	39.83	0.35	0.279	0.422	0.414	0.377	0.258	0.301	0.259	0.222	0.264	0.418	0.278	0.376	0.433	0.341	0.417	0.493	0.382	0.251	0.349
	39.92	0.308	0.259	0.452	0.391	0.307	0.27	0.343	0.235	0.334	0.25	0.418	0.346	0.361	0.402	0.375	0.478	0.45	0.382	0.276	0.388
	40	0.393	0.231	0.361	0.422	0.256	0.223	0.394	0.219	0.333	0.248	0.373	0.406	0.315	0.348	0.379	0.57	0.446	0.313	0.329	0.398
	40.08	0.359	0.246	0.339	0.492	0.302	0.18	0.326	0.233	0.409	0.394	0.431	0.388	0.305	0.366	0.375	0.486	0.533	0.329	0.436	0.348
	40.17	0.378	0.377	0.335	0.473	0.293	0.225	0.337	0.199	0.331	0.349	0.3	0.363	0.335	0.309	0.243	0.394	0.449	0.319	0.426	0.511
	40.25	0.317	0.278	0.358	0.446	0.303	0.227	0.349	0.228	0.392	0.371	0.274	0.225	0.309	0.396	0.277	0.339	0.455	0.316	0.364	0.524
	40.33	0.301	0.291	0.397	0.494	0.327	0.234	0.332	0.208	0.29	0.36	0.473	0.324	0.338	0.363	0.324	0.308	0.386	0.286	0.283	0.473
	40.42	0.347	0.26	0.352	0.425	0.329	0.201	0.318	0.195	0.31	0.311	0.331	0.343	0.358	0.327	0.322	0.304	0.327	0.303	0.295	0.429
	40.5	0.323	0.25	0.343	0.328	0.319	0.24	0.321	0.224	0.277	0.311	0.439	0.399	0.291	0.388	0.283	0.263	0.268	0.316	0.263	0.316
	40.58	0.398	0.247	0.33	0.315	0.347	0.223	0.357	0.297	0.303	0.303	0.467	0.355	0.313	0.527	0.341	0.183	0.286	0.312	0.271	0.408
	40.67	0.403	0.234	0.34	0.32	0.325	0.229	0.375	0.305	0.271	0.315	0.557	0.358	0.371	0.521	0.399	0.232	0.265	0.271	0.326	0.343
	40.75	0.325	0.202	0.341	0.395	0.376	0.254	0.37	0.191	0.249	0.276	0.568	0.351	0.395	0.572	0.427	0.212	0.332	0.343	0.359	0.364
	40.83	0.38	0.306	0.349	0.396	0.376	0.255	0.354	0.371	0.221	0.267	0.472	0.419	0.456	0.601	0.278	0.232	0.379	0.348	0.272	0.492
	40.92	0.395	0.395	0.326	0.364	0.366	0.241	0.32	0.451	0.266	0.341	0.447	0.376	0.461	0.537	0.314	0.292	0.351	0.354	0.288	0.423
	41	0.414	0.348	0.39	0.361	0.315	0.23	0.31	0.287	0.327	0.355	0.518	0.371	0.617	0.446	0.357	0.275	0.358	0.327	0.338	0.31
	41.08	0.44	0.252	0.353	0.409	0.489	0.266	0.317	0.276	0.258	0.322	0.327	0.336	0.411	0.422	0.33	0.266	0.493	0.421	0.313	0.295
	41.17	0.27	0.28	0.369	0.354	0.49	0.22	0.315	0.397	0.325	0.322	0.311	0.389	0.403	0.435	0.394	0.266	0.408	0.449	0.327	0.382
	41.25	0.305	0.26	0.404	0.415	0.451	0.2	0.354	0.479	0.372	0.323	0.436	0.349	0.395	0.356	0.415	0.266	0.429	0.459	0.306	0.401
	41.33	0.407	0.253	0.483	0.439	0.405	0.211	0.265	0.478	0.442	0.324	0.427	0.345	0.333	0.31	0.417	0.282	0.497	0.47	0.321	0.386
	41.42	0.353	0.244	0.396	0.377	0.335	0.183	0.396	0.43	0.353	0.275	0.392	0.328	0.352	0.313	0.405	0.275	0.39	0.403	0.336	0.422
	41.5	0.353	0.329	0.392	0.373	0.364	0.164	0.35	0.493	0.266	0.302	0.358	0.404	0.337	0.353	0.441	0.221	0.463	0.425	0.437	0.366
	41.58	0.315	0.365	0.343	0.377	0.302	0.231	0.34	0.317	0.245	0.349	0.338	0.35	0.337	0.319	0.412	0.375	0.453	0.427	0.456	0.365
	41.67	0.277	0.306	0.33	0.39	0.374	0.235	0.38	0.277	0.229	0.355	0.395	0.489	0.312	0.294	0.347	0.301	0.336	0.343	0.44	0.5
	41.75	0.247	0.315	0.289	0.332	0.496	0.204	0.345	0.257	0.17	0.313	0.344	0.415	0.297	0.268	0.357	0.281	0.331	0.353	0.472	0.484
	41.83	0.274	0.403	0.288	0.322	0.488	0.279	0.33	0.209	0.185	0.432	0.273	0.488	0.413	0.341	0.285	0.243	0.302	0.326	0.522	0.57
	41.92	0.317	0.323	0.241	0.341	0.373	0.284	0.293	0.213	0.245	0.49	0.331	0.416	0.418	0.422	0.332	0.339	0.325	0.321	0.519	0.561
	42	0.307	0.348	0.282	0.368	0.331	0.291	0.267	0.16	0.291	0.509	0.342	0.31	0.325	0.452	0.357	0.347	0.272	0.312	0.329	0.569
	42.08	0.291	0.421	0.353	0.319	0.295	0.259	0.255	0.23	0.34	0.484	0.313	0.295	0.267	0.399	0.35	0.349	0.281	0.324	0.374	0.539
	42.17	0.273	0.467	0.35	0.311	0.286	0.34	0.26	0.278	0.358	0.524	0.403	0.267	0.303	0.498	0.364	0.433	0.235	0.471	0.428	0.499
	42.25	0.31	0.462	0.308	0.281	0.269	0.356	0.336	0.359	0.33	0.544	0.416	0.294	0.31	0.609	0.324	0.47	0.246	0.468	0.42	0.608
	42.33	0.307	0.464	0.425	0.272	0.274	0.374	0.332	0.365	0.308	0.539	0.431	0.257	0.315	0.607	0.334	0.513	0.233	0.527	0.372	0.634
	42.42	0.259	0.483	0.31	0.224	0.329	0.375	0.401	0.33	0.365	0.489	0.414	0.226	0.254	0.589	0.331	0.525	0.215	0.537	0.445	0.663
	42.5	0.277	0.364	0.359	0.317	0.352	0.344	0.359	0.292	0.38	0.55	0.395	0.237	0.23	0.536	0.286	0.509	0.234	0.51	0.534	0.638
	42.58	0.309	0.372	0.352	0.341	0.297	0.314	0.37	0.379	0.399	0.404	0.405	0.234	0.236	0.503	0.295	0.448	0.227	0.488	0.511	0.533
	42.67	0.285	0.327	0.334	0.332	0.45	0.305	0.366	0.375	0.331	0.404	0.367	0.25	0.253	0.62	0.274	0.436	0.239	0.504	0.499	0.523
	42.75	0.319	0.297	0.307	0.311	0.354	0.243	0.324	0.412	0.266	0.34	0.335	0.255	0.286	0.598	0.285	0.437	0.256	0.557	0.432	0.473
	42.83	0.282	0.293	0.313	0.293	0.383	0.245	0.297	0.34	0.236	0.41	0.314	0.24	0.281	0.409	0.271	0.371	0.227	0.455	0.549	0.573
	42.92	0.3	0.279	0.43	0.276	0.389	0.21	0.307	0.348	0.293	0.394	0.29	0.253	0.243	0.266	0.498	0.437	0.237	0.454	0.508	0.513
	43	0.285	0.245	0.263	0.252	0.376	0.203	0.363	0.317	0.238	0.398	0.289	0.26	0.22	0.25	0.326	0.394	0.278	0.382	0.307	0.479
	43.08	0.225	0.246	0.29	0.243	0.341	0.184	0.315	0.269	0.232	0.307	0.259	0.257	0.229	0.24	0.342	0.337	0.37	0.414	0.291	0.472
	43.17	0.282	0.273	0.301	0.299	0.34	0.191	0.307	0.222	0.195	0.298	0.324	0.329	0.235	0.219	0.292	0.193	0.318	0.381	0.284	0.525
	43.25	0.268	0.332	0.243	0.354	0.3	0.181	0.257	0.24	0.203	0.288	0.331	0.37	0.224	0.221	0.335	0.201	0.304	0.357	0.297	0.424
	43.33	0.232	0.355	0.313	0.339	0.293	0.191	0.265	0.21	0.182	0.292	0.376	0.443	0.213	0.206	0.221	0.225	0.29	0.314	0.263	0.38
	43.42	0.32	0.293	0.314	0.351	0.279	0.171	0.271	0.24	0.187	0.248	0.359	0.486	0.303	0.223	0.219	0.217	0.266	0.284	0.218	0.375
	43.5	0.358	0.249	0.35	0.386	0.293	0.231	0.255	0.248	0.18	0.244	0.262	0.376	0.275	0.253	0.24	0.2	0.263	0.234	0.226	0.373
	43.58	0.338	0.225	0.259	0.359	0.337	0.281	0.292	0.222	0.212	0.238	0.242	0.481	0.274	0.284	0.268	0.207	0.24	0.229	0.233	0.399
	43.67	0.298	0.222	0.291	0.329	0.311	0.308	0.275	0.196	0.199	0.234	0.289	0.491	0.237	0.364	0.301	0.233	0.22	0.264	0.213	0.348
	43.75	0.311	0.195	0.33	0.297	0.367	0.258	0.243	0.211	0.204	0.247	0.294	0.417	0.236	0.344	0.378	0.228	0.241	0.183	0.211	0.334
	43.83	0.253	0.188	0.329	0.265	0.376	0.212	0.239	0.204	0.198	0.25	0.209	0.329	0.244	0.269	0.371	0.195	0.214	0.321	0.236	0.275
	43.92	0.249	0.192	0.291	0.247	0.408	0.296	0.238	0.316	0.188	0.253	0.219	0.291	0.277	0.264	0.362	0.21	0.208	0.318	0.248	0.235
	44	0.254	0.184	0.242	0.247	0.392	0.308	0.202	0.22	0.211	0.248	0.241	0.255	0.255	0.232	0.355	0.205	0.203	0.261	0.365	0.209
	44.08	0.299	0.166	0.207	0.235	0.369	0.306	0.198	0.139	0.264	0.229	0.257	0.266	0.244	0.238	0.354	0.199	0.206	0.207	0.345	0.211
	44.17	0.258	0.175	0.204	0.226	0.385	0.292	0.208	0.178	0.213	0.227	0.271	0.249	0.214	0.33	0.312	0.185	0.184	0.26	0.273	0.201
	44.25	0.265	0.173	0.223	0.195	0.322	0.245	0.195	0.175	0.174	0.207	0.259	0.225	0.213	0.332	0.323	0.189	0.182	0.293	0.279	0.323
	44.33	0.269	0.177	0.244	0.207	0.204	0.254	0.208	0.161	0.17	0.201	0.325	0.241	0.227	0.375	0.302	0.195	0.181	0.246	0.239	0.275
	44.42	0.243	0.176	0.315	0.228	0.247	0.208	0.213	0.17	0.179	0.277	0.347	0.218	0.207	0.307	0.296	0.196	0.195	0.216	0.225	0.269
	44.5	0.24	0.195	0.313	0.28	0.238	0.211	0.22	0.202	0.181	0.338	0.274	0.225	0.216	0.255	0.372	0.172	0.242	0.226	0.222	0.275
	44.58	0.242	0.185	0.316	0.287	0.233	0.205	0.208	0.342	0.164	0.302	0.296	0.231	0.21	0.255	0.39	0.181	0.235	0.22	0.212	0.276
	44.67	0.224	0.187	0.354	0.263	0.277	0.205	0.205	0.338	0.239	0.305	0.349	0.215	0.302	0.256	0.347	0.183	0.233	0.182	0.221	0.253
	44.75	0.233	0.162	0.327	0.259	0.279	0.275	0.303	0.35	0.223	0.429	0.345	0.206	0.297	0.246	0.352	0.191	0.212	0.193	0.224	0.247
	44.83	0.283	0.181	0.342	0.261	0.267	0.206	0.299	0.286	0.285	0.419	0.249	0.248	0.261	0.241	0.3	0.215	0.212	0.185	0.223	0.257
	44.92	0.344	0.173	0.351	0.253	0.258	0.2	0.226	0.315	0.294	0.404	0.233	0.311	0.298	0.241	0.275	0.276	0.233	0.205	0.214	0.23
	45	0.34	0.179	0.358	0.243	0.25	0.197	0.261	0.271	0.391	0.397	0.206	0.423	0.333	0.24	0.272	0.32	0.204	0.191	0.188	0.225
	45.08	0.37	0.176	0.331	0.222	0.245	0.187	0.238	0.341	0.221	0.307	0.246	0.367	0.35	0.248	0.273	0.313	0.198	0.189	0.201	0.239
	45.17	0.303	0.19	0.313	0.241	0.237	0.211	0.24	0.335	0.226	0.285	0.265	0.323	0.4	0.219	0.263	0.248	0.202	0.154	0.186	0.262
	45.25	0.296	0.221	0.265	0.221	0.22	0.203	0.216	0.286	0.252	0.239	0.25	0.29	0.429	0.25	0.294	0.235	0.205	0.159	0.184	0.24
	45.33	0.269	0.26	0.275	0.224	0.237	0.208	0.205	0.246	0.222	0.238	0.28	0.278	0.396	0.24	0.192	0.212	0.188	0.28	0.208	0.239
	45.42	0.269	0.303	0.259	0.209	0.282	0.196	0.192	0.216	0.185	0.225	0.298	0.249	0.32	0.255	0.207	0.21	0.195	0.337	0.284	0.262
	45.5	0.239	0.245	0.267	0.198	0.32	0.2	0.187	0.221	0.177	0.277	0.259	0.176	0.275	0.237	0.202	0.193	0.17	0.317	0.382	0.237
	45.58	0.221	0.379	0.234	0.227	0.318	0.202	0.178	0.213	0.152	0.237	0.268	0.18	0.255	0.25	0.224	0.182	0.184	0.297	0.42	0.244
	45.67	0.219	0.4	0.236	0.237	0.351	0.196	0.221	0.19	0.173	0.243	0.267	0.202	0.198	0.217	0.209	0.204	0.172	0.294	0.382	0.229
	45.75	0.213	0.344	0.258	0.211	0.337	0.188	0.239	0.207	0.171	0.22	0.305	0.201	0.203	0.229	0.219	0.204	0.257	0.361	0.386	0.228
	45.83	0.22	0.303	0.268	0.201	0.314	0.199	0.235	0.195	0.156	0.325	0.324	0.28	0.21	0.22	0.226	0.174	0.322	0.311	0.314	0.236
	45.92	0.215	0.256	0.319	0.222	0.248	0.225	0.273	0.173	0.155	0.303	0.383	0.322	0.225	0.215	0.236	0.182	0.314	0.272	0.285	0.225
	46	0.207	0.253	0.313	0.231	0.261	0.231	0.271	0.157	0.199	0.307	0.348	0.284	0.23	0.232	0.229	0.174	0.304	0.208	0.293	0.204
	46.08	0.23	0.222	0.284	0.197	0.25	0.232	0.282	0.205	0.164	0.268	0.289	0.256	0.233	0.217	0.24	0.175	0.338	0.23	0.289	0.204
	46.17	0.216	0.209	0.273	0.205	0.229	0.221	0.269	0.165	0.156	0.243	0.305	0.236	0.228	0.19	0.214	0.136	0.349	0.21	0.257	0.217
	46.25	0.267	0.205	0.248	0.201	0.216	0.208	0.222	0.158	0.176	0.218	0.284	0.228	0.224	0.208	0.332	0.145	0.353	0.207	0.26	0.213
	46.33	0.268	0.199	0.241	0.197	0.24	0.208	0.21	0.137	0.164	0.226	0.28	0.232	0.214	0.262	0.304	0.152	0.315	0.188	0.241	0.204
	46.42	0.221	0.218	0.229	0.203	0.242	0.18	0.209	0.148	0.166	0.222	0.129	0.199	0.2	0.281	0.292	0.153	0.276	0.183	0.228	0.2
	46.5	0.213	0.237	0.229	0.2	0.25	0.177	0.195	0.161	0.173	0.223	0.161	0.25	0.241	0.314	0.269	0.159	0.253	0.187	0.21	0.258
	46.58	0.208	0.152	0.224	0.197	0.26	0.168	0.181	0.187	0.288	0.207	0.163	0.231	0.232	0.301	0.276	0.173	0.268	0.19	0.211	0.294
	46.67	0.203	0.15	0.243	0.202	0.25	0.171	0.177	0.153	0.211	0.205	0.197	0.212	0.299	0.409	0.294	0.172	0.258	0.163	0.191	0.275
	46.75	0.206	0.195	0.216	0.259	0.217	0.148	0.163	0.166	0.233	0.191	0.214	0.209	0.309	0.393	0.318	0.176	0.228	0.181	0.192	0.285
	46.83	0.203	0.189	0.219	0.246	0.214	0.149	0.162	0.168	0.234	0.196	0.228	0.2	0.264	0.321	0.343	0.195	0.204	0.178	0.187	0.232
	46.92	0.224	0.189	0.203	0.228	0.207	0.162	0.169	0.162	0.247	0.197	0.218	0.206	0.24	0.292	0.409	0.254	0.21	0.176	0.184	0.218
	47	0.245	0.191	0.218	0.219	0.208	0.157	0.174	0.139	0.19	0.197	0.292	0.191	0.234	0.268	0.404	0.214	0.2	0.167	0.154	0.328
	47.08	0.316	0.187	0.28	0.174	0.213	0.144	0.173	0.229	0.197	0.181	0.342	0.187	0.209	0.269	0.4	0.209	0.172	0.169	0.16	0.336
	47.17	0.275	0.186	0.327	0.172	0.217	0.189	0.174	0.225	0.172	0.188	0.307	0.193	0.211	0.25	0.275	0.188	0.162	0.174	0.176	0.264
	47.25	0.348	0.198	0.303	0.181	0.276	0.226	0.16	0.231	0.181	0.288	0.303	0.21	0.207	0.232	0.256	0.172	0.182	0.17	0.179	0.248
	47.33	0.387	0.191	0.337	0.165	0.256	0.252	0.175	0.198	0.162	0.292	0.26	0.194	0.2	0.237	0.242	0.163	0.241	0.218	0.179	0.223
	47.42	0.323	0.174	0.281	0.236	0.346	0.241	0.222	0.178	0.192	0.317	0.219	0.183	0.192	0.211	0.247	0.164	0.285	0.238	0.166	0.227
	47.5	0.313	0.206	0.278	0.27	0.394	0.262	0.221	0.175	0.163	0.398	0.208	0.2	0.207	0.137	0.201	0.159	0.214	0.251	0.169	0.213
	47.58	0.326	0.224	0.261	0.313	0.409	0.25	0.291	0.159	0.16	0.311	0.217	0.19	0.201	0.145	0.229	0.165	0.205	0.23	0.185	0.21
	47.67	0.299	0.211	0.259	0.302	0.415	0.255	0.347	0.15	0.18	0.342	0.223	0.192	0.189	0.181	0.236	0.169	0.18	0.228	0.25	0.205
	47.75	0.265	0.188	0.241	0.303	0.387	0.214	0.266	0.162	0.171	0.289	0.217	0.209	0.202	0.185	0.217	0.163	0.188	0.265	0.314	0.215
	47.83	0.243	0.183	0.233	0.287	0.397	0.215	0.262	0.171	0.151	0.307	0.204	0.196	0.209	0.191	0.258	0.173	0.169	0.24	0.282	0.195
	47.92	0.233	0.229	0.224	0.256	0.312	0.226	0.364	0.146	0.151	0.301	0.19	0.317	0.213	0.194	0.341	0.233	0.184	0.245	0.279	0.195
	48	0.22	0.241	0.227	0.254	0.27	0.247	0.462	0.132	0.157	0.279	0.222	0.264	0.19	0.299	0.281	0.235	0.16	0.207	0.207	0.177
	48.08	0.223	0.201	0.224	0.202	0.243	0.226	0.489	0.129	0.189	0.228	0.212	0.302	0.195	0.31	0.278	0.23	0.161	0.198	0.208	0.185
	48.17	0.226	0.185	0.228	0.178	0.245	0.206	0.467	0.128	0.225	0.221	0.309	0.418	0.28	0.344	0.231	0.232	0.19	0.184	0.189	0.179
	48.25	0.21	0.181	0.258	0.182	0.222	0.189	0.488	0.156	0.217	0.196	0.254	0.399	0.299	0.32	0.231	0.265	0.186	0.199	0.181	0.181
	48.33	0.201	0.187	0.3	0.175	0.211	0.19	0.538	0.132	0.236	0.203	0.289	0.316	0.358	0.454	0.207	0.22	0.185	0.187	0.172	0.196
	48.42	0.2	0.189	0.272	0.168	0.203	0.175	0.418	0.137	0.274	0.179	0.295	0.329	0.305	0.402	0.206	0.203	0.18	0.191	0.178	0.207
	48.5	0.184	0.175	0.272	0.184	0.197	0.169	0.417	0.146	0.281	0.193	0.315	0.264	0.267	0.288	0.193	0.164	0.185	0.18	0.188	0.184
	48.58	0.241	0.166	0.234	0.165	0.194	0.171	0.462	0.173	0.281	0.197	0.302	0.243	0.258	0.236	0.192	0.185	0.195	0.186	0.19	0.286
	48.67	0.261	0.176	0.224	0.162	0.2	0.163	0.49	0.159	0.292	0.191	0.293	0.226	0.222	0.175	0.191	0.177	0.16	0.174	0.186	0.307
	48.75	0.273	0.159	0.224	0.174	0.273	0.152	0.527	0.243	0.223	0.183	0.27	0.195	0.213	0.157	0.195	0.159	0.165	0.188	0.186	0.304
	48.83	0.294	0.171	0.219	0.181	0.255	0.149	0.531	0.352	0.203	0.188	0.248	0.212	0.209	0.153	0.317	0.15	0.175	0.234	0.174	0.234
	48.92	0.298	0.179	0.196	0.209	0.296	0.163	0.51	0.235	0.184	0.184	0.24	0.209	0.208	0.18	0.34	0.177	0.176	0.24	0.17	0.374
	49	0.303	0.168	0.205	0.213	0.31	0.158	0.551	0.283	0.173	0.179	0.245	0.208	0.196	0.18	0.31	0.177	0.166	0.203	0.169	0.402
	49.08	0.266	0.174	0.227	0.241	0.334	0.156	0.526	0.274	0.184	0.175	0.236	0.194	0.205	0.192	0.329	0.16	0.189	0.25	0.171	0.361
	49.17	0.236	0.165	0.218	0.278	0.338	0.135	0.536	0.263	0.158	0.184	0.241	0.195	0.189	0.187	0.325	0.141	0.182	0.232	0.17	0.329
	49.25	0.223	0.216	0.199	0.309	0.288	0.218	0.521	0.264	0.16	0.175	0.222	0.197	0.2	0.197	0.369	0.169	0.195	0.223	0.174	0.322
	49.33	0.205	0.224	0.199	0.288	0.263	0.234	0.555	0.226	0.164	0.171	0.233	0.233	0.171	0.177	0.343	0.158	0.242	0.217	0.182	0.292
	49.42	0.197	0.268	0.22	0.282	0.248	0.225	0.526	0.196	0.146	0.159	0.271	0.267	0.188	0.19	0.349	0.171	0.324	0.218	0.196	0.287
	49.5	0.189	0.263	0.228	0.264	0.242	0.19	0.524	0.206	0.139	0.189	0.234	0.227	0.209	0.191	0.274	0.151	0.372	0.203	0.274	0.239
	49.58	0.207	0.345	0.314	0.236	0.206	0.187	0.495	0.182	0.122	0.231	0.227	0.349	0.234	0.244	0.23	0.175	0.394	0.214	0.265	0.24
	49.67	0.195	0.273	0.27	0.227	0.215	0.176	0.534	0.163	0.136	0.242	0.218	0.4	0.279	0.273	0.23	0.224	0.333	0.184	0.298	0.23
	49.75	0.221	0.252	0.228	0.202	0.197	0.156	0.604	0.173	0.238	0.27	0.223	0.369	0.281	0.275	0.229	0.195	0.291	0.19	0.282	0.215
	49.83	0.273	0.216	0.222	0.186	0.202	0.143	0.561	0.179	0.185	0.278	0.217	0.206	0.347	0.297	0.196	0.132	0.222	0.157	0.253	0.209
	49.92	0.337	0.186	0.207	0.195	0.192	0.161	0.551	0.168	0.207	0.246	0.215	0.213	0.336	0.257	0.194	0.167	0.226	0.184	0.241	0.206
	50	0.334	0.182	0.265	0.186	0.188	0.16	0.458	0.159	0.178	0.256	0.265	0.213	0.303	0.238	0.31	0.126	0.193	0.173	0.202	0.213
	50.08	0.353	0.167	0.341	0.165	0.178	0.147	0.502	0.165	0.167	0.21	0.345	0.214	0.246	0.222	0.3	0.118	0.209	0.189	0.191	0.192
	50.17	0.268	0.173	0.328	0.178	0.192	0.159	0.497	0.169	0.15	0.193	0.336	0.22	0.233	0.207	0.254	0.11	0.154	0.166	0.195	0.3
	50.25	0.245	0.166	0.293	0.173	0.166	0.243	0.493	0.146	0.162	0.181	0.276	0.277	0.213	0.197	0.234	0.174	0.151	0.178	0.186	0.271
	50.33	0.238	0.17	0.253	0.173	0.231	0.255	0.554	0.14	0.153	0.18	0.266	0.297	0.19	0.194	0.245	0.169	0.163	0.225	0.179	0.283
	50.42	0.228	0.177	0.234	0.162	0.275	0.246	0.428	0.142	0.161	0.167	0.252	0.255	0.197	0.182	0.23	0.182	0.177	0.287	0.167	0.246
	50.5	0.215	0.179	0.225	0.181	0.275	0.229	0.443	0.145	0.154	0.158	0.241	0.247	0.213	0.184	0.222	0.18	0.172	0.246	0.167	0.237
	50.58	0.24	0.168	0.211	0.174	0.292	0.24	0.323	0.188	0.149	0.167	0.239	0.234	0.204	0.201	0.234	0.172	0.179	0.255	0.172	0.208
	50.67	0.24	0.167	0.21	0.166	0.284	0.254	0.267	0.185	0.198	0.162	0.228	0.217	0.2	0.182	0.229	0.146	0.174	0.212	0.172	0.192
	50.75	0.231	0.173	0.213	0.206	0.247	0.2	0.243	0.227	0.217	0.169	0.227	0.208	0.196	0.189	0.232	0.147	0.179	0.197	0.175	0.202
	50.83	0.221	0.166	0.21	0.246	0.232	0.181	0.236	0.213	0.217	0.176	0.209	0.185	0.193	0.277	0.21	0.156	0.176	0.18	0.172	0.204
	50.92	0.219	0.155	0.197	0.215	0.198	0.181	0.217	0.193	0.233	0.18	0.201	0.219	0.189	0.289	0.26	0.15	0.16	0.187	0.192	0.193
	51	0.211	0.148	0.189	0.21	0.205	0.181	0.218	0.157	0.3	0.173	0.3	0.19	0.178	0.302	0.3	0.15	0.184	0.171	0.314	0.192
	51.08	0.25	0.14	0.279	0.19	0.183	0.165	0.216	0.154	0.308	0.169	0.213	0.188	0.168	0.33	0.314	0.156	0.198	0.183	0.316	0.198
	51.17	0.222	0.161	0.287	0.172	0.194	0.155	0.21	0.151	0.207	0.186	0.216	0.188	0.172	0.296	0.307	0.14	0.244	0.177	0.281	0.185
	51.25	0.295	0.169	0.244	0.158	0.17	0.149	0.193	0.171	0.256	0.267	0.22	0.191	0.177	0.246	0.269	0.137	0.249	0.182	0.285	0.189
	51.33	0.279	0.166	0.281	0.161	0.192	0.155	0.196	0.154	0.211	0.267	0.234	0.251	0.208	0.233	0.238	0.229	0.324	0.173	0.251	0.193
	51.42	0.286	0.143	0.271	0.158	0.216	0.182	0.261	0.143	0.218	0.351	0.258	0.259	0.233	0.217	0.229	0.244	0.339	0.235	0.213	0.188
	51.5	0.249	0.15	0.259	0.172	0.23	0.175	0.27	0.158	0.172	0.304	0.321	0.249	0.269	0.215	0.225	0.208	0.285	0.254	0.21	0.19
	51.58	0.226	0.202	0.247	0.179	0.208	0.17	0.217	0.209	0.186	0.42	0.332	0.343	0.276	0.205	0.208	0.284	0.307	0.265	0.205	0.279
	51.67	0.206	0.228	0.234	0.171	0.201	0.163	0.216	0.25	0.186	0.445	0.347	0.303	0.282	0.201	0.213	0.34	0.254	0.339	0.191	0.331
	51.75	0.199	0.29	0.225	0.159	0.185	0.145	0.193	0.25	0.165	0.382	0.306	0.322	0.233	0.197	0.2	0.39	0.263	0.261	0.192	0.358
	51.83	0.201	0.357	0.309	0.25	0.184	0.203	0.202	0.201	0.165	0.347	0.272	0.312	0.26	0.191	0.199	0.23	0.253	0.343	0.201	0.251
	51.92	0.198	0.298	0.294	0.259	0.225	0.25	0.177	0.31	0.173	0.301	0.262	0.27	0.25	0.224	0.198	0.294	0.247	0.36	0.196	0.319
	52	0.183	0.251	0.291	0.253	0.299	0.248	0.185	0.396	0.187	0.271	0.27	0.275	0.24	0.236	0.204	0.289	0.207	0.291	0.189	0.395
	52.08	0.177	0.237	0.335	0.309	0.304	0.214	0.174	0.273	0.169	0.237	0.24	0.253	0.225	0.231	0.219	0.281	0.221	0.248	0.185	0.403
	52.17	0.177	0.214	0.329	0.306	0.293	0.23	0.179	0.309	0.166	0.222	0.223	0.265	0.199	0.199	0.197	0.235	0.205	0.234	0.208	0.44
	52.25	0.311	0.213	0.291	0.287	0.298	0.262	0.166	0.208	0.158	0.207	0.14	0.252	0.188	0.217	0.213	0.212	0.199	0.228	0.202	0.32
	52.33	0.24	0.172	0.261	0.246	0.259	0.112	0.175	0.174	0.163	0.183	0.14	0.239	0.244	0.263	0.205	0.21	0.206	0.197	0.176	0.269
	52.42	0.292	0.183	0.259	0.222	0.271	0.198	0.311	0.268	0.216	0.216	0.205	0.218	0.234	0.274	0.219	0.216	0.298	0.191	0.214	0.252
	52.5	0.256	0.25	0.272	0.307	0.282	0.221	0.339	0.213	0.156	0.196	0.284	0.322	0.272	0.309	0.251	0.199	0.37	0.204	0.339	0.317
	52.58	0.29	0.294	0.364	0.324	0.317	0.245	0.268	0.197	0.163	0.196	0.256	0.37	0.284	0.385	0.308	0.261	0.337	0.22	0.324	0.344
	52.67	0.31	0.277	0.294	0.299	0.296	0.221	0.338	0.163	0.138	0.19	0.266	0.347	0.307	0.301	0.261	0.252	0.348	0.231	0.277	0.284
	52.75	0.269	0.336	0.332	0.268	0.311	0.156	0.327	0.145	0.157	0.168	0.285	0.359	0.357	0.245	0.247	0.233	0.307	0.251	0.31	0.282
	52.83	0.216	0.264	0.332	0.248	0.306	0.159	0.344	0.219	0.162	0.19	0.306	0.377	0.304	0.208	0.26	0.182	0.272	0.241	0.316	0.233
	52.92	0.199	0.266	0.307	0.277	0.262	0.216	0.308	0.253	0.145	0.258	0.287	0.379	0.297	0.226	0.33	0.21	0.293	0.239	0.309	0.229
[truncated: 53 more rows]

[truncated: 12 more sheets: Fig.7J, Fig.8A,C,D, Fig.9A,C,D,E,F, Fig.S3A,B,C, Fig.S4A, Fig.S4B, Fig.S4C, Fig.S4D, Fig.S5A,B, Fig.S6A,B,C, Fig.S7A, Fig.S8B,C]
