# Supplementary material for: Transcriptional programming of lipid and amino acid metabolism by the skeletal muscle circadian clock
Source: PLoS Biol. 2018 Aug 10;16(8):e2005886. doi: 10.1371/journal.pbio.2005886 (PMC6105032; doi:10.1371/journal.pbio.2005886)
Supplement: S2 Table — (XLSX) [file pbio.2005886.s013.xlsx]

## Sheet: Clover_motifs_BMAL1
Clover: Cis-eLement OVERrepresentation
Compiled on Jan 14 2016
Sequence file: 2787_HighConfidenceBmal1Peaks2.fasta (2787 sequences, 2327552 bp, 40.2% C+G)
Motif file: JASPER_and_HOMER_motifs_2017.txt (540 motifs)
*** Over- and Under-represented Motifs:
Motif	factor	Raw score	Rank	FDR
MACCTTCYATGGCTCCCTAKTGCCY	ZNF16(Zf)/HEK293-ZNF16.GFP-ChIP-Seq(GSE58341)/Homer	inf	1	0.000371058
CTGGCAGGCTGCCA	Tlx?(NR)/NPC-H3K4me1-ChIP-Seq(GSE16256)/Homer	inf	2	0.000742115
NGAGGTCANNGAGTTCANNN	VDR(NR),DR3/GM10855-VDR+vitD-ChIP-Seq(GSE22484)/Homer	inf	3	0.00111317
ATTTCCCAGVAKSCY	ZNF143|STAF(Zf)/CUTLL-ZNF143-ChIP-Seq(GSE29600)/Homer	inf	4	0.00148423
MA0152.1	NFATC2	inf	5	0.00185529
GGAGCTGTCCATGGTGCTGA	REST-NRSF(Zf)/Jurkat-NRSF-ChIP-Seq/Homer	inf	6	0.00222635
MA0161.1	NFIC	inf	7	0.0025974
GGGRAARRGRMCAGMTG	RBPJ:Ebox(?,bHLH)/Panc1-Rbpj1-ChIP-Seq(GSE47459)/Homer	inf	8	0.00296846
GAATGGAAAAAATGAGTCAT	NFAT:AP1(RHD,bZIP)/Jurkat-NFATC1-ChIP-Seq(Jolma_et_al.)/Homer	inf	9	0.00333952
MA0528.1	ZNF263	inf	10	0.00371058
GGYAGCAYDTGCTDCCCNNN	EBNA1(EBV-virus)/Raji-EBNA1-ChIP-Seq(GSE30709)/Homer	inf	11	0.00408163
SMCAGTCWGAKGGAGGAGGC	ZSCAN22(Zf)/HEK293-ZSCAN22.GFP-ChIP-Seq(GSE58341)/Homer	inf	12	0.00445269
TGCAGTTCCAANAGTGGCCA	CTCF-SatelliteElement(Zf?)/CD4+-CTCF-ChIP-Seq(Barski_et_al.)/Homer	inf	13	0.00482375
AGAACAGNCTGTTCTT	ARE(NR)/LNCAP-AR-ChIP-Seq(GSE27824)/Homer	inf	14	0.00519481
AGTAAACAAAAAAGAACANA	FOXA1:AR(Forkhead,NR)/LNCAP-AR-ChIP-Seq(GSE27824)/Homer	inf	15	0.00556586
CACAGCAGGGGG	Unknown-ESC-element(?)/mES-Nanog-ChIP-Seq(GSE11724)/Homer	inf	16	0.00593692
CCTCATGGTGYCYTWYTCCCTTGTG	ZNF41(Zf)/HEK293-ZNF41.GFP-ChIP-Seq(GSE58341)/Homer	inf	17	0.00630798
GNCTGTASTRNTGBCTCHTT	ZNF382(Zf)/HEK293-ZNF382.GFP-ChIP-Seq(GSE58341)/Homer	inf	18	0.00667904
GAGCCTGGTACTGWGCCTGR	ZNF322(Zf)/HEK293-ZNF322.GFP-ChIP-Seq(GSE58341)/Homer	inf	19	0.00705009
AGGAAACAGCTG	ETS:E-box(ETS,bHLH)/HPC7-Scl-ChIP-Seq(GSE22178)/Homer	693	20	0.00742115
TAGGGCAAAGGTCA	RXR(NR),DR1/3T3L1-RXR-ChIP-Seq(GSE13511)/Homer	686	21	0.00779221
AAGGKGRCGCAGGCA	ZNF165(Zf)/WHIM12-ZNF165-ChIP-Seq(GSE65937)/Homer	684	22	0.00816327
ACAGGATGTGGT	ETS:RUNX(ETS,Runt)/Jurkat-RUNX1-ChIP-Seq(GSE17954)/Homer	682	23	0.00853432
NNNGCATGTCCNGACATGCC	p63(p53)/Keratinocyte-p63-ChIP-Seq(GSE17611)/Homer	680	24	0.00890538
GTAGGTCACTGGGTCA	Reverb(NR),DR2/RAW-Reverba.biotin-ChIP-Seq(GSE45914)/Homer	680	25	0.00927644
RGGTCADNNAGAGGTCAV	RAR:RXR(NR),DR5/ES-RAR-ChIP-Seq(GSE56893)/Homer	675	26	0.0096475
MA0073.1	RREB1	673	27	0.0100186
GGGTTTTGAAGGATGARTAGGAGTT	ZFP3(Zf)/HEK293-ZFP3.GFP-ChIP-Seq(GSE58341)/Homer	672	28	0.0103896
NAGTTTCABTHTGACTNW	bZIP:IRF(bZIP,IRF)/Th17-BatF-ChIP-Seq(GSE39756)/Homer	664	29	0.0107607
AACATGCCCAGACATGCCCN	p53(p53)/Saos-p53-ChIP-Seq(GSE15780)/Homer	662	30	0.0111317
AACTACAATTCCCAGAATGC	GFY-Staf(?,Zf)/Promoter/Homer	661	31	0.0115028
GAGGTCAAAGGTCA	TR4(NR),DR1/Hela-TR4-ChIP-Seq(GSE24685)/Homer	649	32	0.0118738
TGACCTTTGCCCCA	PPARE(NR),DR1/3T3L1-Pparg-ChIP-Seq(GSE13511)/Homer	649	33	0.0122449
NTGGGTGTGGCC	EKLF(Zf)/Erythrocyte-Klf1-ChIP-Seq(GSE20478)/Homer	648	34	0.012616
CAGAGGNCAAAGTCCA	HNF4a(NR),DR1/HepG2-HNF4a-ChIP-Seq(GSE25021)/Homer	648	35	0.012987
GTCATGCHTGRCTGS	Pax8(Paired,Homeobox)/Thyroid-Pax8-ChIP-Seq(GSE26938)/Homer	646	36	0.0133581
GGGGGTGTGTCC	KLF10(Zf)/HEK293-KLF10.GFP-ChIP-Seq(GSE58341)/Homer	645	37	0.0137291
TGGGGAAGGGCM	ZNF467(Zf)/HEK293-ZNF467.GFP-ChIP-Seq(GSE58341)/Homer	637	38	0.0141002
RACTACAACTCCCAGVAKGC	Ronin(THAP)/ES-Thap11-ChIP-Seq(GSE51522)/Homer	636	39	0.0144712
CNNBRGCGCCCCCTGSTGGC	BORIS(Zf)/K562-CTCFL-ChIP-Seq(GSE32465)/Homer	633	40	0.0148423
CTTGGCACNGTGCCAA	NF1(CTF)/LNCAP-NF1-ChIP-Seq(Unpublished)/Homer	627	41	0.0152134
ATAGTGCCACCTGGTGGCCA	CTCF(Zf)/CD4+-CTCF-ChIP-Seq(Barski_et_al.)/Homer	626	42	0.0155844
GGAAGTGAAAST	PU.1:IRF8(ETS:IRF)/pDC-Irf8-ChIP-Seq(GSE66899)/Homer	622	43	0.0159555
AGAAATGACTTCCCT	ZNF528(Zf)/HEK293-ZNF528.GFP-ChIP-Seq(GSE58341)/Homer	621	44	0.0163265
	E1-E2_motif	621	45	0.0166976
MA0472.1	EGR2	615	46	0.0170686
NNNVCTGWGYAAACASN	Fox:Ebox(Forkhead,bHLH)/Panc1-Foxa2-ChIP-Seq(GSE47459)/Homer	613	47	0.0174397
AGAGGAAGTG	PU.1(ETS)/ThioMac-PU.1-ChIP-Seq(GSE21512)/Homer	610	48	0.0178108
NNTGTTTATTTTGGCA	NF1:FOXA1(CTF,Forkhead)/LNCAP-FOXA1-ChIP-Seq(GSE27824)/Homer	609	49	0.0181818
GGGGCTYGKCTGGGA	Zfp809(Zf)/ES-Zfp809-ChIP-Seq(GSE70799)/Homer	605	50	0.0185529
YTKGATAHAGTATTCTWGGTNGGCA	ZNF136(Zf)/HEK293-ZNF136.GFP-ChIP-Seq(GSE58341)/Homer	595	51	0.0189239
MA0056.1	MZF1_1-4	595	52	0.019295
GAAAGTGAAAGT	IRF1(IRF)/PBMC-IRF1-ChIP-Seq(GSE43036)/Homer	586	53	0.019666
NAGAACAGNCTGTTCT	GRE	583	54	0.0200371
NAGAACAGNCTGTTCT	GRE(NR),IR3/A549-GR-ChIP-Seq(GSE32465)/Homer	583	55	0.0204082
NNNCTTTCCAGGAAA	Bcl6(Zf)/Liver-Bcl6-ChIP-Seq(GSE31578)/Homer	582	56	0.0207792
CGGCTGCNGNNNNCAGATAA	GATA:SCL(Zf,bHLH)/Ter119-SCL-ChIP-Seq(GSE18720)/Homer	574	57	0.0211503
GTCWGCTGTYYCTCT	ZNF317(Zf)/HEK293-ZNF317.GFP-ChIP-Seq(GSE58341)/Homer	569	58	0.0215213
CGGAAGTGAAAC	PU.1-IRF(ETS:IRF)/Bcell-PU.1-ChIP-Seq(GSE21512)/Homer	565	59	0.0218924
CTTTCANTATGACTV	IRF:BATF(IRF:bZIP)/pDC-Irf8-ChIP-Seq(GSE66899)/Homer	561	60	0.0222635
GTCCCCAGGGGA	EBF1(EBF)/Near-E2A-ChIP-Seq(GSE21512)/Homer	557	61	0.0226345
GCCACRCCCACY	Klf9(Zf)/GBM-Klf9-ChIP-Seq(GSE62211)/Homer	556	62	0.0230056
AGCAGCTGCTGC	MyoD(bHLH)/Myotube-MyoD-ChIP-Seq(GSE21614)/Homer	556	63	0.0233766
GSCTGTCACTCA	PBX1(Homeobox)/MCF7-PBX1-ChIP-Seq(GSE28007)/Homer	553	64	0.0237477
AGATSTNDNNDSAGATAASN	GATA3(Zf),DR8/iTreg-Gata3-ChIP-Seq(GSE20898)/Homer	550	65	0.0241187
GCCACACCCA	Klf4(Zf)/mES-Klf4-ChIP-Seq(GSE11431)/Homer	538	66	0.0244898
ACTTTCACTTTC	PRDM1(Zf)/Hela-PRDM1-ChIP-Seq(GSE31477)/Homer	537	67	0.0248609
MA0514.1	Sox3	535	68	0.0252319
MA0442.1	SOX10	530	69	0.025603
AACAGGAAGT	Ets1-distal(ETS)/CD4+-PolII-ChIP-Seq(Barski_et_al.)/Homer	525	70	0.025974
ACTYKNATTCGTGNTACTTC	Mouse_Recombination_Hotspot(Zf)/Testis-DMC1-ChIP-Seq(GSE24438)/Homer	524	71	0.0263451
MA0130.1	ZNF354C	521	72	0.0267161
VAGRACAKNCTGTBC	PR(NR)/T47D-PR-ChIP-Seq(GSE31130)/Homer	507	73	0.0270872
AWWNTGCTGAGTCAT	Bach1(bZIP)/K562-Bach1-ChIP-Seq(GSE31477)/Homer	506	74	0.0274583
AAGAACATWHTGTTC	PGR(NR)/EndoStromal-PGR-ChIP-Seq(GSE69539)/Homer	506	75	0.0278293
ADGGYAGYAGCATCT	PRDM9(Zf)/Testis-DMC1-ChIP-Seq(GSE35498)/Homer	505	76	0.0282004
AAGGTCACNGTGACC	ERE(NR),IR3/MCF7-ERa-ChIP-Seq(Unpublished)/Homer	500	77	0.0285714
CCAGGAACAG	AR-halfsite(NR)/LNCaP-AR-ChIP-Seq(GSE27824)/Homer	500	78	0.0289425
VNAVCAGCTGGC	Atoh1(bHLH)/Cerebellum-Atoh1-ChIP-Seq(GSE22111)/Homer	498	79	0.0293135
ACAGCTGCTG	Tcf12(bHLH)/GM12878-Tcf12-ChIP-Seq(GSE32465)/Homer	496	80	0.0296846
NTNATGCAAYMNNHTGMAAY	CEBP:CEBP(bZIP)/MEF-Chop-ChIP-Seq(GSE35681)/Homer	496	81	0.0300557
VAGRACAKWCTGTYC	GRE(NR),IR3/RAW264.7-GRE-ChIP-Seq(Unpublished)/Homer	494	82	0.0304267
NNTTCTGGAANNTTCTAGAA	HRE(HSF)/HepG2-HSF1-ChIP-Seq(GSE31477)/Homer	488	83	0.0307978
MA0002.2	RUNX1	487	84	0.0311688
AGTTTCAGTTTC	ISRE(IRF)/ThioMac-LPS-Expression(GSE23622)/Homer	485	85	0.0315399
GGGGGGGG	Maz(Zf)/HepG2-Maz-ChIP-Seq(GSE31477)/Homer	484	86	0.0319109
YCTTTGTTCC	Sox4(HMG)/proB-Sox4-ChIP-Seq(GSE50066)/Homer	484	87	0.032282
RGKGGGCGKGGC	KLF14(Zf)/HEK293-KLF14.GFP-ChIP-Seq(GSE58341)/Homer	482	88	0.0326531
CCTGTCAATCAN	Pbx3(Homeobox)/GM12878-PBX3-ChIP-Seq(GSE32465)/Homer	481	89	0.0330241
AGGTCAAGGTCA	RARg(NR)/ES-RARg-ChIP-Seq(GSE30538)/Homer	480	90	0.0333952
NRGCCCCRCCCHBNN	KLF3(Zf)/MEF-Klf3-ChIP-Seq(GSE44748)/Homer	479	91	0.0337662
MA0599.1	KLF5	475	92	0.0341373
ATGCCCTGAGGC	AP-2alpha(AP2)/Hela-AP2alpha-ChIP-Seq(GSE31477)/Homer	475	93	0.0345083
ANACAGCTGC			94	0.0348794
NWAACCACADNN	RUNX2(Runt)/PCa-RUNX2-ChIP-Seq(GSE33889)/Homer	471	95	0.0352505
GGTCCCTAGGGA	EBF(EBF)/proBcell-EBF-ChIP-Seq(GSE21978)/Homer	466	96	0.0356215
MA0079.3	SP1	465	97	0.0359926
ARGAGGMCAAAATGW	ZNF675(Zf)/HEK293-ZNF675.GFP-ChIP-Seq(GSE58341)/Homer	463	98	0.0363636
GGTCANYTGAGGWCA	THRa(NR)/C17.2-THRa-ChIP-Seq(GSE38347)/Homer	463	99	0.0367347
YTAATTRAWWCCAGATGT	Pitx1:Ebox(Homeobox,bHLH)/Hindlimb-Pitx1-ChIP-Seq(GSE41591)/Homer	463	100	0.0371058
ACATGCCCGGGCAT	p53(p53)/mES-cMyc-ChIP-Seq(GSE11431)/Homer	461	101	0.0374768
NAACAGCTGG	Tcf21(bHLH)/ArterySmoothMuscle-Tcf21-ChIP-Seq(GSE61369)/Homer	461	102	0.0378479
HTGCTGAGTCAT	Nrf2(bZIP)/Lymphoblast-Nrf2-ChIP-Seq(GSE37589)/Homer	456	103	0.0382189
AAAGRGGAAGTG	SpiB(ETS)/OCILY3-SPIB-ChIP-Seq(GSE56857)/Homer	452	104	0.03859
AGGTGHCAGACA	Tbox:Smad(T-box,MAD)/ESCd5-Smad2_3-ChIP-Seq(GSE29422)/Homer	452	105	0.038961
SCCTSAGGSCAW	AP-2gamma(AP2)/MCF7-TFAP2C-ChIP-Seq(GSE21234)/Homer	451	106	0.0393321
NNCACCTGCN	E2A(bHLH),near_PU.1/Bcell-PU.1-ChIP-Seq(GSE21512)/Homer	449	107	0.0397032
GCCATCTGTT	NeuroD1(bHLH)/Islet-NeuroD1-ChIP-Seq(GSE30298)/Homer	449	108	0.0400742
CNGTCCTCCC	Znf263(Zf)/K562-Znf263-ChIP-Seq(GSE31477)/Homer	448	109	0.0404453
ATTTCCTGTN	EWS:ERG-fusion(ETS)/CADO_ES1-EWS:ERG-ChIP-Seq(SRA014231)/Homer	447	110	0.0408163
GCTGTGGTTT	RUNX-AML(Runt)/CD4+-PolII-ChIP-Seq(Barski_et_al.)/Homer	443	111	0.0411874
ANTTMRCASBNNNGTGYKAAN	Brachyury(T-box)/Mesoendoderm-Brachyury-ChIP-exo(GSE54963)/Homer	443	112	0.0415584
AACATCTGGA	ZBTB18(Zf)/HEK293-ZBTB18.GFP-ChIP-Seq(GSE58341)/Homer	442	113	0.0419295
GGTTGCCATGGCAA	X-box(HTH)/NPC-H3K4me1-ChIP-Seq(GSE16256)/Homer	442	114	0.0423006
WDNCTGGGCA	ZNF416(Zf)/HEK293-ZNF416.GFP-ChIP-Seq(GSE58341)/Homer	441	115	0.0426716
ACATCAAAGGGA	Tcf4(HMG)/Hct116-Tcf4-ChIP-Seq(SRA012054)/Homer	441	116	0.0430427
GCTGASTCAGCA	MafK(bZIP)/C2C12-MafK-ChIP-Seq(GSE36030)/Homer	440	117	0.0434137
CCATTGTATGCAAAT	Oct4:Sox17(POU,Homeobox,HMG)/F9-Sox17-ChIP-Seq(GSE44553)/Homer	440	118	0.0437848
ACAGCTGTTN	Ptf1a(bHLH)/Panc1-Ptf1a-ChIP-Seq(GSE47459)/Homer	440	119	0.0441558
AGATGKDGAGATAAG	GATA3(Zf),DR4/iTreg-Gata3-ChIP-Seq(GSE20898)/Homer	439	120	0.0445269
CAAAGGTCAG	Erra(NR)/HepG2-Erra-ChIP-Seq(GSE31477)/Homer	438	121	0.044898
MA0136.1	ELF5	437	122	0.045269
MA0109.1	Hltf	437	123	0.0456401
MA0474.1	Erg	433	124	0.0460111
MA0598.1	EHF	433	125	0.0463822
GATGACTCAGCA	NF-E2(bZIP)/K562-NFE2-ChIP-Seq(GSE31477)/Homer	427	126	0.0467532
GRTGMTRGAGCC	ZNF415(Zf)/HEK293-ZNF415.GFP-ChIP-Seq(GSE58341)/Homer	426	127	0.0471243
NTTTCCAGGAAA	STAT4(Stat)/CD4-Stat4-ChIP-Seq(GSE22104)/Homer	425	128	0.0474954
NNNNNBAGATAWYATCTVHN	GATA(Zf),IR3/iTreg-Gata3-ChIP-Seq(GSE20898)/Homer	421	129	0.0478664
MA0092.1	Hand1::Tcfe2a	420	130	0.0482375
BAACAGCTGT	Myf5(bHLH)/GM-Myf5-ChIP-Seq(GSE24852)/Homer	420	131	0.0486085
ATTTCTNAGAAA	STAT5(Stat)/mCD4+-Stat5-ChIP-Seq(GSE12346)/Homer	417	132	0.0489796
ACAGGAAGTG	ERG(ETS)/VCaP-ERG-ChIP-Seq(GSE14097)/Homer	417	133	0.0493506
NNVVCAGCTGBN	Ascl1(bHLH)/NeuralTubes-Ascl1-ChIP-Seq(GSE55840)/Homer	415	134	0.0497217
AAACYKGTTWDACMRGTTTB	GRHL2(CP2)/HBE-GRHL2-ChIP-Seq(GSE46194)/Homer	415	135	0.0500928
MA0041.1	Foxd3	412	136	0.0504638
AACAGCTG	MyoG(bHLH)/C2C12-MyoG-ChIP-Seq(GSE36024)/Homer	407	137	0.0508349
GGTGYTGACAGS	Tbx20(T-box)/Heart-Tbx20-ChIP-Seq(GSE29636)/Homer	407	138	0.0512059
SCTGTCAVTCAV	Pknox1(Homeobox)/ES-Prep1-ChIP-Seq(GSE63282)/Homer	402	139	0.051577
MA0481.1	FOXP1	400	140	0.0519481
AGGTCAAGGTCA	RAR:RXR(NR),DR5/ES-RAR-ChIP-Seq(GSE56893)/Homer	396	141	0.0523191
CNCTTCCNGGAAGN	Stat3+il21(Stat)/CD4-Stat3-ChIP-Seq(GSE19198)/Homer	393	142	0.0526902
MA0065.2	PPARG::RXRA	391	143	0.0530612
AAATCACTGC	Gfi1b(Zf)/HPC7-Gfi1b-ChIP-Seq(GSE22178)/Homer	390	144	0.0534323
NAHCAGCTGD	Ap4(bHLH)/AML-Tfap4-ChIP-Seq(GSE45738)/Homer	388	145	0.0538033
TTCAAGGTCA	Nr5a2(NR)/mES-Nr5a2-ChIP-Seq(GSE19019)/Homer	385	146	0.0541744
MA0505.1	Nr5a2	385	147	0.0545455
CCWGGAATGY	TEAD2(TEA)/Py2T-Tead2-ChIP-Seq(GSE55709)/Homer	384	148	0.0549165
TTCTAGAABNTTCTA	HRE(HSF)/Striatum-HSF1-ChIP-Seq(GSE38000)/Homer	383	149	0.0552876
AACAGGAAAT	EWS:FLI1-fusion(ETS)/SK_N_MC-EWS:FLI1-ChIP-Seq(SRA014231)/Homer	382	150	0.0556586
ACAGGAAGTG	ETS1(ETS)/Jurkat-ETS1-ChIP-Seq(GSE17954)/Homer	381	151	0.0560297
NGTGTTCAVTSAAGCGKAAA	PAX6(Paired,Homeobox)/Forebrain-Pax6-ChIP-Seq(GSE66961)/Homer	379	152	0.0564007
MA0068.1	Pax4	378	153	0.0567718
CAAACCACAG	RUNX(Runt)/HPC7-Runx1-ChIP-Seq(GSE22178)/Homer	372	154	0.0571429
AGGVNCCTTTGT	Sox9(HMG)/Limb-SOX9-ChIP-Seq(GSE73225)/Homer	371	155	0.0575139
AGGTCANTGACCTN	FXR(NR),IR1/Liver-FXR-ChIP-Seq(Chong_et_al.)/Homer	363	156	0.057885
HTTTCCCASG	Rbpj1(?)/Panc1-Rbpj1-ChIP-Seq(GSE47459)/Homer	363	157	0.058256
AAACCACAAA	RUNX1(Runt)/Jurkat-RUNX1-ChIP-Seq(GSE29180)/Homer	362	158	0.0586271
GCAGCCAAGCGTGACC	PAX5(Paired,Homeobox)/GM12878-PAX5-ChIP-Seq(GSE32465)/Homer	360	159	0.0589981
NATTTCCNGGAAAT	STAT1(Stat)/HelaS3-STAT1-ChIP-Seq(GSE12782)/Homer	360	160	0.0593692
GGTTGCCATGGCAA	Rfx1(HTH)/NPC-H3K4me1-ChIP-Seq(GSE16256)/Homer	360	161	0.0597403
BTCAAGGTCA	Nr5a2(NR)/Pancreas-LRH1-ChIP-Seq(GSE34295)/Homer	360	162	0.0601113
CCCATTGTTC	Sox2(HMG)/mES-Sox2-ChIP-Seq(GSE11431)/Homer	358	163	0.0604824
CCWTTGTYYB	Sox10(HMG)/SciaticNerve-Sox3-ChIP-Seq(GSE35132)/Homer	355	164	0.0608534
ATTTGCATAACAATG	OCT4-SOX2-TCF-NANOG(POU,Homeobox,HMG)/mES-Oct4-ChIP-Seq(GSE11431)/Homer	355	165	0.0612245
ANTTCTTAAGAA	STAT6(Stat)/CD4-Stat6-ChIP-Seq(GSE22104)/Homer	354	166	0.0615955
MA0042.1	FOXI1	352	167	0.0619666
MA0516.1	SP2	351	168	0.0623377
NGNTCTAGAACCNGV	ZBTB12(Zf)/HEK293-ZBTB12.GFP-ChIP-Seq(GSE58341)/Homer	350	169	0.0627087
RAACAATGGN	Sox15(HMG)/CPA-Sox15-ChIP-Seq(GSE62909)/Homer	347	170	0.0630798
CCTGCTGAGH	Zic(Zf)/Cerebellum-ZIC1.2-ChIP-Seq(GSE60731)/Homer	344	171	0.0634508
TTGCCAAG	NF1-halfsite(CTF)/LNCaP-NF1-ChIP-Seq(Unpublished)/Homer	343	172	0.0638219
ACTACAATTCCC	GFY(?)/Promoter/Homer	339	173	0.0641929
MA0461.1	Atoh1	338	174	0.064564
DGGGYGKGGC	KLF5(Zf)/LoVo-KLF5-ChIP-Seq(GSE49402)/Homer	337	175	0.0649351
SCCTAGCAACAG	Rfx5(HTH)/GM12878-Rfx5-ChIP-Seq(GSE31477)/Homer	335	176	0.0653061
MA0081.1	SPIB	333	177	0.0656772
TGCTGAGTCA	Bach2(bZIP)/OCILy7-Bach2-ChIP-Seq(GSE44420)/Homer	332	178	0.0660482
NCTGGAATGC	TEAD(TEA)/Fibroblast-PU.1-ChIP-Seq(Unpublished)/Homer	326	179	0.0664193
CGTGGGTGGTCC	GLI3(Zf)/Limb-GLI3-ChIP-Chip(GSE11077)/Homer	323	180	0.0667904
VGCTGWCAVB	Meis1(Homeobox)/MastCells-Meis1-ChIP-Seq(GSE48085)/Homer	322	181	0.0671614
RCCATMTGTT	Olig2(bHLH)/Neuron-Olig2-ChIP-Seq(GSE30882)/Homer	320	182	0.0675325
ACATCAAAGG	Tcf3(HMG)/mES-Tcf3-ChIP-Seq(GSE11724)/Homer	320	183	0.0679035
HWWGTCAGCAWWTTT	MafF(bZIP)/HepG2-MafF-ChIP-Seq(GSE31477)/Homer	318	184	0.0682746
ATTTTCCATT	NFAT(RHD)/Jurkat-NFATC1-ChIP-Seq(Jolma_et_al.)/Homer	317	185	0.0686456
ACWTCAAAGG	TCFL2(HMG)/K562-TCF7L2-ChIP-Seq(GSE29196)/Homer	316	186	0.0690167
MA0160.1	NR4A2	313	187	0.0693878
TGGAACAGMA	ZNF189(Zf)/HEK293-ZNF189.GFP-ChIP-Seq(GSE58341)/Homer	307	188	0.0697588
TGCTGACTCA	MafA(bZIP)/Islet-MafA-ChIP-Seq(GSE30298)/Homer	304	189	0.0701299
NAAACCGGTTCAAACCGGTT	Tcfcp2l1(CP2)/mES-Tcfcp2l1-ChIP-Seq(GSE11431)/Homer	300	190	0.0705009
MA0597.1	THAP1	298	191	0.070872
CCWTTGTY	Sox3(HMG)/NPC-Sox3-ChIP-Seq(GSE33059)/Homer	297	192	0.071243
CTTGTTTACATA	Foxa2(Forkhead)/Liver-Foxa2-ChIP-Seq(GSE25694)/Homer	297	193	0.0716141
YDGHTACAWTGTADC	DMRT6(DM)/Testis-DMRT6-ChIP-Seq(GSE60440)/Homer	295	194	0.0719852
ANCAGCTG	SCL(bHLH)/HPC7-Scl-ChIP-Seq(GSE13511)/Homer	294	195	0.0723562
CGGTTGCCATGGCAAC	RFX(HTH)/K562-RFX3-ChIP-Seq(SRA012198)/Homer	291	196	0.0727273
AAAGTAAACA	FOXA1(Forkhead)/LNCAP-FOXA1-ChIP-Seq(GSE27824)/Homer	289	197	0.0730983
NNAYTTCCTGHN	Etv2(ETS)/ES-ER71-ChIP-Seq(GSE59402)/Homer(0.967)	288	198	0.0734694
TWGHWACAWTGTWDC	DMRT1(DM)/Testis-DMRT1-ChIP-Seq(GSE64892)/Homer	288	199	0.0738404
AAAGTAAACA	FOXA1(Forkhead)/MCF7-FOXA1-ChIP-Seq(GSE26831)/Homer	288	200	0.0742115
GATGACTCATCN	Jun-AP1(bZIP)/K562-cJun-ChIP-Seq(GSE31477)/Homer	287	201	0.0745826
TGCGTGGGYG	Egr1(Zf)/K562-Egr1-ChIP-Seq(GSE32465)/Homer	287	202	0.0749536
GTTGCCATGGCAACM	Rfx2(HTH)/LoVo-RFX2-ChIP-Seq(GSE49402)/Homer	284	203	0.0753247
GAAASYGAAASY	IRF2(IRF)/Erythroblas-IRF2-ChIP-Seq(GSE36985)/Homer	283	204	0.0756957
AVCAGGAAGT	EHF(ETS)/LoVo-EHF-ChIP-Seq(GSE49402)/Homer	281	205	0.0760668
VCAGCTGBNN	HEB(bHLH)/mES-Heb-ChIP-Seq(GSE53233)/Homer	280	206	0.0764378
CTGTTTAC	Foxo1(Forkhead)/RAW-Foxo1-ChIP-Seq(Fan_et_al.)/Homer	279	207	0.0768089
ATGACTCATC	AP-1(bZIP)/ThioMac-PU.1-ChIP-Seq(GSE21512)/Homer	276	208	0.07718
DATGASTCATHN	Atf3(bZIP)/GBM-ATF3-ChIP-Seq(GSE33912)/Homer	272	209	0.077551
VBSYGTCTGG	Smad4(MAD)/ESC-SMAD4-ChIP-Seq(GSE29422)/Homer	271	210	0.0779221
ATGAATATTCATGAG	OCT:OCT(POU,Homeobox)/NPC-Brn1-ChIP-Seq(GSE35496)/Homer	270	211	0.0782931
TTCCKNAGAA	STAT6(Stat)/Macrophage-Stat6-ChIP-Seq(GSE38377)/Homer	264	212	0.0786642
ACTTTCGTTTCT	T1ISRE(IRF)/ThioMac-Ifnb-Expression/Homer	263	213	0.0790353
MA0098.2	Ets1	261	214	0.0794063
NATGASTCABNN	Fosl2(bZIP)/3T3L1-Fosl2-ChIP-Seq(GSE56872)/Homer	258	215	0.0797774
TWGTCTGV	Smad3(MAD)/NPC-Smad3-ChIP-Seq(GSE36673)/Homer	257	216	0.0801484
TGACCTTTNCNT	Nur77(NR)/K562-NR4A1-ChIP-Seq(GSE31363)/Homer	254	217	0.0805195
SCHTGTTTACAT	FOXK2(Forkhead)/U2OS-FOXK2-ChIP-Seq(E-MTAB-2204)/Homer	254	218	0.0808905
GGATGACTCATC	Fra2(bZIP)/Striatum-Fra2-ChIP-Seq(GSE43429)/Homer	252	219	0.0812616
MA0154.2	EBF1	251	220	0.0816327
NAGATWNBNATCTNN	GATA(Zf),IR4/iTreg-Gata3-ChIP-Seq(GSE20898)/Homer	251	221	0.0820037
AGGCCTGG	ZFX(Zf)/mES-Zfx-ChIP-Seq(GSE11431)/Homer	249	222	0.0823748
MA0522.1	Tcf3	249	223	0.0827458
MA0080.3	Spi1	248	224	0.0831169
NYYTGTTTACHN	FOXP1(Forkhead)/H9-FOXP1-ChIP-Seq(GSE31006)/Homer	241	225	0.0834879
TRTTTACTTW	FOXM1(Forkhead)/MCF7-FOXM1-ChIP-Seq(GSE72977)/Homer	237	226	0.083859
GTGACCTTGA	Esrrb(NR)/mES-Esrrb-ChIP-Seq(GSE11431)/Homer	236	227	0.0842301
AAGCACTTAA	Nkx3.1(Homeobox)/LNCaP-Nkx3.1-ChIP-Seq(GSE28264)/Homer	228	228	0.0846011
MA0512.1	Rxra	228	229	0.0849722
WWTRTAAACAVG	FoxL2(Forkhead)/Ovary-FoxL2-ChIP-Seq(GSE60858)/Homer	224	230	0.0853432
DATGASTCAT	BATF(bZIP)/Th17-BATF-ChIP-Seq(GSE39756)/Homer	223	231	0.0857143
ACATCCTGGT	SPDEF(ETS)/VCaP-SPDEF-ChIP-Seq(SRA014231)/Homer	222	232	0.0860853
ATATGCAAAT	Oct2(POU,Homeobox)/Bcell-Oct2-ChIP-Seq(GSE21512)/Homer	221	233	0.0864564
NGCGTGGGCGGR	Egr2(Zf)/Thymocytes-Egr2-ChIP-Seq(GSE34254)/Homer	221	234	0.0868275
CAGATAAGGN	Gata1(Zf)/K562-GATA1-ChIP-Seq(GSE18829)/Homer	218	235	0.0871985
WATGCAAATGAG	Oct6(POU,Homeobox)/NPC-Pou3f1-ChIP-Seq(GSE35496)/Homer	215	236	0.0875696
GTCACGCTCNCTGA	PAX5(Paired,Homeobox),condensed/GM12878-PAX5-ChIP-Seq(GSE32465)/Homer	211	237	0.0879406
CAAGGHCANV	SF1(NR)/H295R-Nr5a1-ChIP-Seq(GSE44220)/Homer	211	238	0.0883117
AGGGGATTTCCC	NFkB-p65(RHD)/GM12787-p65-ChIP-Seq(GSE19485)/Homer	210	239	0.0886827
NCCTTATCTC	Gata2(Zf)/K562-GATA2-ChIP-Seq(GSE18829)/Homer	208	240	0.0890538
RSCACTYRAG	Nkx2.1(Homeobox)/LungAC-Nkx2.1-ChIP-Seq(GSE43252)/Homer	206	241	0.0894249
AGGTGTGAAM	Tbet(T-box)/CD8-Tbet-ChIP-Seq(GSE33802)/Homer	206	242	0.0897959
CCWGGAATGY	TEAD4(TEA)/Tropoblast-Tead4-ChIP-Seq(GSE37350)/Homer	198	243	0.090167
NNATGASTCATH	Fra1(bZIP)/BT549-Fra1-ChIP-Seq(GSE46166)/Homer	196	244	0.090538
BTBRAGTGSN	Nkx2.2(Homeobox)/NPC-Nkx2.2-ChIP-Seq(GSE61673)/Homer	194	245	0.0909091
AASCACTCAA	Nkx2.5(Homeobox)/HL1-Nkx2.5.biotin-ChIP-Seq(GSE21529)/Homer	190	246	0.0912801
CCATTGTTNY	Sox6(HMG)/Myotubes-Sox6-ChIP-Seq(GSE32627)/Homer	189	247	0.0916512
MA0144.2	STAT3	188	248	0.0920223
NATGTTGCAA	CEBP:AP1(bZIP)/ThioMac-CEBPb-ChIP-Seq(GSE21512)/Homer	187	249	0.0923933
MA0521.1	Tcf12	186	250	0.0927644
GGGTTACTANAGGTCA	LXRE(NR),DR4/RAW-LXRb.biotin-ChIP-Seq(GSE21512)/Homer	185	251	0.0931354
MA0058.2	MAX	185	252	0.0935065
GYCATCMATCAT	HOXA2(Homeobox)/mES-Hoxa2-ChIP-Seq(Donaldson_et_al.)/Homer	184	253	0.0938776
GKVTCADRTTWC	Six1(Homeobox)/Myoblast-Six1-ChIP-Chip(GSE20150)/Homer	183	254	0.0942486
CTGTCTGG	Smad2(MAD)/ES-SMAD2-ChIP-Seq(GSE29422)/Homer	182	255	0.0946197
MA0500.1	Myog	182	256	0.0949907
AGGTCTCTAACC	PRDM14(Zf)/H1-PRDM14-ChIP-Seq(GSE22767)/Homer	181	257	0.0953618
DCYAAAAATAGM	Mef2c(MADS)/GM12878-Mef2c-ChIP-Seq(GSE32465)/Homer	179	258	0.0957328
GGCCCCGCCCCC	Sp1(Zf)/Promoter/Homer	176	259	0.0961039
NNTGTGGATTSS	Foxh1(Forkhead)/hESC-FOXH1-ChIP-Seq(GSE29422)/Homer	175	260	0.096475
MA0057.1	MZF1_5-13	174	261	0.096846
TATGCWAATBAV	Brn1(POU,Homeobox)/NPC-Brn1-ChIP-Seq(GSE35496)/Homer	174	262	0.0972171
CGGTCACGCCAC	Srebp2(bHLH)/HepG2-Srebp2-ChIP-Seq(GSE31477)/Homer	173	263	0.0975881
ACVAGGAAGT	ELF5(ETS)/T47D-ELF5-ChIP-Seq(GSE30407)/Homer	171	264	0.0979592
MA0511.1	RUNX2	170	265	0.0983302
MA0157.1	FOXO3	167	266	0.0987013
ATTAACACCT	Eomes(T-box)/H9-Eomes-ChIP-Seq(GSE26097)/Homer	167	267	0.0990724
MA0475.1	FLI1	166	268	0.0994434
YTGWCADY	Tgif1(Homeobox)/mES-Tgif1-ChIP-Seq(GSE55404)/Homer	166	269	0.0998145
MA0519.1	Stat5a::Stat5b	166	270	0.100186
MA0499.1	Myod1	164	271	0.100557
MA0007.2	AR	164	272	0.100928
TRAGGTCA	THRb(NR)/Liver-NR1A2-ChIP-Seq(GSE52613)/Homer	163	273	0.101299
YCTTATCTBN	Gata6(Zf)/HUG1N-GATA6-ChIP-Seq(GSE51936)/Homer	160	274	0.10167
ATTTGCATAA	Oct4(POU,Homeobox)/mES-Oct4-ChIP-Seq(GSE11431)/Homer	159	275	0.102041
GCTATTTTTGGM	Mef2b(MADS)/HEK293-Mef2b.V5-ChIP-Seq(GSE67450)/Homer	156	276	0.102412
TTRAGTGSYK	Bapx1(Homeobox)/VertebralCol-Bapx1-ChIP-Seq(GSE36672)/Homer	155	277	0.102783
MA0087.1	Sox5	155	278	0.103154
MA0515.1	Sox6	150	279	0.103525
MA0498.1	Meis1	150	280	0.103896
GCTATTTTTAGC	Mef2d(MADS)/Retina-Mef2d-ChIP-Seq(GSE61391)/Homer	147	281	0.104267
MA0162.2	EGR1	147	282	0.104638
MA0156.1	FEV	147	283	0.105009
AGGTGTCA	Tbx5(T-box)/HL1-Tbx5.biotin-ChIP-Seq(GSE21529)/Homer	143	284	0.10538
ATGMATATDC	Pit1(Homeobox)/GCrat-Pit1-ChIP-Seq(GSE58009)/Homer	142	285	0.105751
CTTCCGGGAA	Stat3(Stat)/mES-Stat3-ChIP-Seq(GSE11431)/Homer	141	286	0.106122
GTGGGCCCCA	ZNF692(Zf)/HEK293-ZNF692.GFP-ChIP-Seq(GSE58341)/Homer	141	287	0.106494
GWAAYHTGAKMC	Six2(Homeobox)/NephronProgenitor-Six2-ChIP-Seq(GSE39837)/Homer	141	288	0.106865
AGRGGTCA	COUP-TFII(NR)/Artia-Nr2f2-ChIP-Seq(GSE46497)/Homer	140	289	0.107236
MA0508.1	PRDM1	140	290	0.107607
RTCATGTGAC	MITF(bHLH)/MastCells-MITF-ChIP-Seq(GSE48085)/Homer	140	291	0.107978
MA0133.1	BRCA1	134	292	0.108349
MA0147.2	Myc	132	293	0.10872
NRRTGACGTCAT	Atf2(bZIP)/3T3L1-Atf2-ChIP-Seq(GSE56872)/Homer	131	294	0.109091
MA0524.1	TFAP2C	129	295	0.109462
ATCACCCCAT	Srebp1a(bHLH)/HepG2-Srebp1a-ChIP-Seq(GSE31477)/Homer	128	296	0.109833
MA0099.2	JUN::FOS	127	297	0.110204
GGAAATTCCC	NFkB-p65-Rel(RHD)/ThioMac-LPS-Expression(GSE23622)/Homer	126	298	0.110575
MA0088.1	znf143	126	299	0.110946
AGGCCTAG	ZNF711(Zf)/SHSY5Y-ZNF711-ChIP-Seq(GSE20673)/Homer	124	300	0.111317
CCATATATGGNA	CArG(MADS)/PUER-Srf-ChIP-Seq(Sullivan_et_al.)/Homer	124	301	0.111688
MA0149.1	EWSR1-FLI1	124	302	0.112059
MA0050.2	IRF1	123	303	0.11243
GGGGGAATCCCC	NFkB-p50,p52(RHD)/Monocyte-p50-ChIP-Chip(Schreiber_et_al.)/Homer	122	304	0.112801
CGGTTTCAAA	CHR(?)/Hela-CellCycle-Expression/Homer	121	305	0.113173
DGTAAACA	Foxo3(Forkhead)/U2OS-Foxo3-ChIP-Seq(E-MTAB-2701)/Homer	121	306	0.113544
CCTTTTATAGCC	TATA-Box(TBP)/Promoter/Homer	120	307	0.113915
MA0143.3	Sox2	119	308	0.114286
MA0484.1	HNF4G	116	309	0.114657
MA0493.1	Klf1	115	310	0.115028
GAGSCCGAGC	ZNF519(Zf)/HEK293-ZNF519.GFP-ChIP-Seq(GSE58341)/Homer	115	311	0.115399
MA0139.1	CTCF	115	312	0.11577
AACCGGAAGT	ETV1(ETS)/GIST48-ETV1-ChIP-Seq(GSE22441)/Homer	114	313	0.116141
MA0112.2	ESR1	109	314	0.116512
TGTCANYT	Tgif2(Homeobox)/mES-Tgif2-ChIP-Seq(GSE55404)/Homer	107	315	0.116883
ACCACGTGGTCN	Max(bHLH)/K562-Max-ChIP-Seq(GSE31477)/Homer	106	316	0.117254
ATTGCATCAT	Chop(bZIP)/MEF-Chop-ChIP-Seq(GSE35681)/Homer	105	317	0.117625
MTGATGCAAT	Atf4(bZIP)/MEF-Atf4-ChIP-Seq(GSE35681)/Homer	103	318	0.117996
MA0039.2	Klf4	102	319	0.118367
KCCACGTGAC	NPAS2(bHLH)/Liver-NPAS2-ChIP-Seq(GSE39860)/Homer	101	320	0.118738
GTCATAAAAN	Cdx2(Homeobox)/mES-Cdx2-ChIP-Seq(GSE14586)/Homer	99.7	321	0.119109
MA0518.1	Stat4	99.2	322	0.119481
MA0503.1	Nkx2-5 (var.2)	96	323	0.119852
MA0114.2	HNF4A	90.9	324	0.120223
GGCCATTAAC	Nanog(Homeobox)/mES-Nanog-ChIP-Seq(GSE11724)/Homer	90.2	325	0.120594
MA0473.1	ELF1	89.9	326	0.120965
MA0510.1	RFX5	87.8	327	0.121336
MA0103.2	ZEB1	86	328	0.121707
ATGAATWATTCATGA	OCT:OCT(POU,Homeobox,IR1)/NPC-Brn2-ChIP-Seq(GSE35496)/Homer	85.4	329	0.122078
CAAGATGGCGGC	YY1(Zf)/Promoter/Homer	84.9	330	0.122449
MA0145.2	Tcfcp2l1	84.9	331	0.12282
GGCCATAAATCA	HOXA9(Homeobox)/HSC-Hoxa9-ChIP-Seq(GSE33509)/Homer	84.7	332	0.123191
TGATTRATGGCY	Hoxb4(Homeobox)/ES-Hoxb4-ChIP-Seq(GSE34014)/Homer	82.6	333	0.123562
TGGCAGTTGG	AMYB(HTH)/Testes-AMYB-ChIP-Seq(GSE44588)/Homer	82.1	334	0.123933
MA0513.1	SMAD2::SMAD3::SMAD4	82.1	335	0.124304
ATGACGTCATCC	c-Jun-CRE(bZIP)/K562-cJun-ChIP-Seq(GSE31477)/Homer	81.3	336	0.124675
AGCCAATCGG	NFY(CCAAT)/Promoter/Homer	81.2	337	0.125046
CCAAAAATAG	Mef2a(MADS)/HL1-Mef2a.biotin-ChIP-Seq(GSE21529)/Homer	80.8	338	0.125417
MA0483.1	Gfi1b	77.8	339	0.125788
TTTTATKRGG	HOXB13(Homeobox)/ProstateTumor-HOXB13-ChIP-Seq(GSE56288)/Homer	76	340	0.12616
MA0017.1	NR2F1	74.1	341	0.126531
MA0525.1	TP63	73.3	342	0.126902
NCYAATAAAA	HOXD13(Homeobox)/Chicken-Hoxd13-ChIP-Seq(GSE38910)/Homer	72.9	343	0.127273
MA0122.1	Nkx3-2	72.8	344	0.127644
MA0258.2	ESR2	69.2	345	0.128015
MA0480.1	Foxo1	66.8	346	0.128386
MA0071.1	RORA_1	66.7	347	0.128757
AAYTAGGTCA	RORgt(NR)/EL4-RORgt.Flag-ChIP-Seq(GSE56019)/Homer	63.6	348	0.129128
ACTGAAACCA	IRF4(IRF)/GM12878-IRF4-ChIP-Seq(GSE32465)/Homer	63.6	349	0.129499
ATGAATATTC	Brn2(POU,Homeobox)/NPC-Brn2-ChIP-Seq(GSE35496)/Homer	63.4	350	0.12987
MA0141.2	Esrrb	62.7	351	0.130241
GTCACGTGGT	Usf2(bHLH)/C2C12-Usf2-ChIP-Seq(GSE36030)/Homer	61.8	352	0.130612
AACCGGAAGT	GABPA(ETS)/Jurkat-GABPa-ChIP-Seq(GSE17954)/Homer	60.5	353	0.130983
GNCCACGTGG	c-Myc(bHLH)/mES-cMyc-ChIP-Seq(GSE11431)/Homer	59.7	354	0.131354
NBWGATAAGR	Gata4(Zf)/Heart-Gata4-ChIP-Seq(GSE35151)/Homer	59.1	355	0.131725
NGRTGACGTCAY	Atf7(bZIP)/3T3L1-Atf7-ChIP-Seq(GSE56872)/Homer	58.9	356	0.132096
MA0520.1	Stat6	57.5	357	0.132468
MA0463.1	Bcl6	57.1	358	0.132839
TCATCAATCA	Pdx1(Homeobox)/Islet-Pdx1-ChIP-Seq(SRA008281)/Homer	56.8	359	0.13321
MA0003.2	TFAP2A	56.8	360	0.133581
MA0113.2	NR3C1	56	361	0.133952
ATGCATAATTCA	Pit1+1bp(Homeobox)/GCrat-Pit1-ChIP-Seq(GSE58009)/Homer	55.7	362	0.134323
MA0592.1	ESRRA	54.8	363	0.134694
MA0142.1	Pou5f1::Sox2	49.9	364	0.135065
MA0496.1	MAFK	49.7	365	0.135436
MA0027.1	En1	49.5	366	0.135807
MA0517.1	STAT2::STAT1	48.6	367	0.136178
MA0111.1	Spz1	47.6	368	0.136549
MA0084.1	SRY	46.4	369	0.13692
MA0090.1	TEAD1	46.2	370	0.137291
GGCCATAAATCA	Hoxc9(Homeobox)/Ainv15-Hoxc9-ChIP-Seq(GSE21812)/Homer	45.8	371	0.137662
MA0148.3	FOXA1	45.2	372	0.138033
MA0486.1	HSF1	40.3	373	0.138404
MA0155.1	INSM1	39.4	374	0.138776
RGGGCACTAACY	ZNF264(Zf)/HEK293-ZNF264.GFP-ChIP-Seq(GSE58341)/Homer	39.2	375	0.139147
MA0526.1	USF2	37.7	376	0.139518
MA0478.1	FOSL2	37.7	377	0.139889
NTAATTDGCYAATTANNWWD	Pax7(Paired,Homeobox),longest/Myoblast-Pax7-ChIP-Seq(GSE25064)/Homer	37.1	378	0.14026
MA0137.3	STAT1	37	379	0.140631
MA0100.2	Myb	36.7	380	0.141002
MA0523.1	TCF7L2	34.5	381	0.141373
MA0593.1	FOXP2	34.2	382	0.141744
MA0504.1	NR2C2	34	383	0.142115
MA0507.1	POU2F2	31.6	384	0.142486
MA0497.1	MEF2C	29.6	385	0.142857
MA0101.1	REL	28.5	386	0.143228
MA0038.1	Gfi1	27.9	387	0.143599
MA0495.1	MAFF	26.7	388	0.14397
ACCGTGACTAATTNN	PAX3:FKHR-fusion(Paired,Homeobox)/Rh4-PAX3:FKHR-ChIP-Seq(GSE19063)/Homer	24.8	389	0.144341
MA0464.1	Bhlhe40	23.1	390	0.144712
GARTGGTCATCGCCC	ZNF669(Zf)/HEK293-ZNF669.GFP-ChIP-Seq(GSE58341)/Homer	22.5	391	0.145083
GNCCACGTGG	n-Myc(bHLH)/mES-nMyc-ChIP-Seq(GSE11431)/Homer	19.8	392	0.145455
GGCGGGAARN	E2F6(E2F)/Hela-E2F6-ChIP-Seq(GSE31477)/Homer	19.6	393	0.145826
MA0105.3	NFKB1	17.9	394	0.146197
MA0091.1	TAL1::TCF3	17.3	395	0.146568
AGATAASR	GATA3(Zf)/iTreg-Gata3-ChIP-Seq(GSE20898)/Homer	16.7	396	0.146939
MA0489.1	JUN (var.2)	15.8	397	0.14731
MA0146.2	Zfx	15.4	398	0.147681
MA0490.1	JUNB	15.3	399	0.148052
NRYTTCCGGH	Fli1(ETS)/CD8-FLI-ChIP-Seq(GSE20898)/Homer	14.8	400	0.148423
MA0509.1	Rfx1	14.5	401	0.148794
MA0106.2	TP53	13.6	402	0.149165
CTAATKGV	Isl1(Homeobox)/Neuron-Isl1-ChIP-Seq(GSE31456)/Homer	12.3	403	0.149536
GGTTAAACATTAAC	Hnf1(Homeobox)/Liver-Foxa2-Chip-Seq(GSE25694)/Homer	12.3	404	0.149907
MA0151.1	ARID3A	11.8	405	0.150278
MA0031.1	FOXD1	11.2	406	0.150649
GGCAATTAAA	Unknown(Homeobox)/Limb-p300-ChIP-Seq/Homer	10.6	407	0.15102
NGYCATAAAWCH	CDX4(Homeobox)/ZebrafishEmbryos-Cdx4.Myc-ChIP-Seq(GSE48254)/Homer	10.5	408	0.151391
MA0471.1	E2F6	9.98	409	0.151763
MA0476.1	FOS	9.76	410	0.152134
MA0078.1	Sox17	9.65	411	0.152505
MA0477.1	FOSL1	9.54	412	0.152876
MA0095.2	YY1	8.25	413	0.153247
MA0465.1	CDX2	8.05	414	0.153618
MA0107.1	RELA	7.73	415	0.153989
MA0501.1	NFE2::MAF	7.22	416	0.15436
MA0488.1	JUN	7.21	417	0.154731
MA0048.1	NHLH1	6.55	418	0.155102
MA0163.1	PLAG1	4.75	419	0.155473
MA0035.3	Gata1	4.36	420	0.155844
MA0083.2	SRF	4.11	421	0.156215
MA0492.1	JUND (var.2)	3.86	422	0.156586
MA0093.2	USF1	3.29	423	0.156957
MA0036.2	GATA2	3.22	424	0.157328
NYTAATCCYB	Otx2(Homeobox)/EpiLC-Otx2-ChIP-Seq(GSE56098)/Homer	2.59	425	0.157699
MA0462.1	BATF::JUN	1.8	426	0.158071
MA0591.1	Bach1::Mafk	1.67	427	0.158442
MA0159.1	RXR::RAR_DR5	1.26	428	0.158813
MA0596.1	SREBF2	1.13	429	0.159184
MA0491.1	JUND	0.898	430	0.159555
MA0052.2	MEF2A	0.162	431	0.159926
MA0164.1	Nr2e3	0.0303	432	0.160297

## Sheet: Clover_motifs_REVERBa
Clover: Cis-eLement OVERrepresentation
Compiled on Jan 14 2016
Sequence file: ReverbA_HighConfidencePeaks_for_Motif_enbrichment.fasta (1263 sequences, 1463962 bp, 49.2% C+G)
Motif file: JASPER_and_HOMER_motifs_2017.txt (539 motifs)
*** Over- and Under-represented Motifs:
Motif	Factor	Raw score	Rank	FDR (0.2)
MA0516.1	SP2	inf	1	0.000371058
MA0528.1	ZNF263	inf	2	0.000742115
MA0079.3	SP1	inf	3	0.00111317
MA0599.1	KLF5	inf	4	0.00148423
AGTAAACAAAAAAGAACANA	FOXA1:AR(Forkhead,NR)/LNCAP-AR-ChIP-Seq(GSE27824)/Homer	663	5	0.00185529
CCTCATGGTGYCYTWYTCCCTTGTG	ZNF41(Zf)/HEK293-ZNF41.GFP-ChIP-Seq(GSE58341)/Homer	636	6	0.00222635
SMCAGTCWGAKGGAGGAGGC	ZSCAN22(Zf)/HEK293-ZSCAN22.GFP-ChIP-Seq(GSE58341)/Homer	624	7	0.0025974
MACCTTCYATGGCTCCCTAKTGCCY	ZNF16(Zf)/HEK293-ZNF16.GFP-ChIP-Seq(GSE58341)/Homer	614	8	0.00296846
MA0073.1	RREB1	574	9	0.00333952
MA0152.1	NFATC2	534	10	0.00371058
GAATGGAAAAAATGAGTCAT	NFAT:AP1(RHD,bZIP)/Jurkat-NFATC1-ChIP-Seq(Jolma_et_al.)/Homer	516	11	0.00408163
GGGRAARRGRMCAGMTG	RBPJ:Ebox(?,bHLH)/Panc1-Rbpj1-ChIP-Seq(GSE47459)/Homer	514	12	0.00445269
GAGCCTGGTACTGWGCCTGR	ZNF322(Zf)/HEK293-ZNF322.GFP-ChIP-Seq(GSE58341)/Homer	493	13	0.00482375
NAGTTTCABTHTGACTNW	bZIP:IRF(bZIP,IRF)/Th17-BatF-ChIP-Seq(GSE39756)/Homer	471	14	0.00519481
MA0162.2	EGR1	468	15	0.00556586
MA0472.1	EGR2	454	16	0.00593692
YTKGATAHAGTATTCTWGGTNGGCA	ZNF136(Zf)/HEK293-ZNF136.GFP-ChIP-Seq(GSE58341)/Homer	440	17	0.00630798
GNCTGTASTRNTGBCTCHTT	ZNF382(Zf)/HEK293-ZNF382.GFP-ChIP-Seq(GSE58341)/Homer	433	18	0.00667904
GGAGCTGTCCATGGTGCTGA	REST-NRSF(Zf)/Jurkat-NRSF-ChIP-Seq/Homer	422	19	0.00705009
NNTGTTTATTTTGGCA	NF1:FOXA1(CTF,Forkhead)/LNCAP-FOXA1-ChIP-Seq(GSE27824)/Homer	421	20	0.00742115
MA0056.1	MZF1_1-4	417	21	0.00779221
NGAGGTCANNGAGTTCANNN	VDR(NR),DR3/GM10855-VDR+vitD-ChIP-Seq(GSE22484)/Homer	417	22	0.00816327
GAAAGTGAAAGT	IRF1(IRF)/PBMC-IRF1-ChIP-Seq(GSE43036)/Homer	415	23	0.00853432
GGGTTTTGAAGGATGARTAGGAGTT	ZFP3(Zf)/HEK293-ZFP3.GFP-ChIP-Seq(GSE58341)/Homer	411	24	0.00890538
MA0068.1	Pax4	410	25	0.00927644
AGATSTNDNNDSAGATAASN	GATA3(Zf),DR8/iTreg-Gata3-ChIP-Seq(GSE20898)/Homer	402	26	0.0096475
CTTTCANTATGACTV	IRF:BATF(IRF:bZIP)/pDC-Irf8-ChIP-Seq(GSE66899)/Homer	399	27	0.0100186
GGAAGTGAAAST	PU.1:IRF8(ETS:IRF)/pDC-Irf8-ChIP-Seq(GSE66899)/Homer	398	28	0.0103896
ACTYKNATTCGTGNTACTTC	Mouse_Recombination_Hotspot(Zf)/Testis-DMC1-ChIP-Seq(GSE24438)/Homer	397	29	0.0107607
AGGAAACAGCTG	ETS:E-box(ETS,bHLH)/HPC7-Scl-ChIP-Seq(GSE22178)/Homer	395	30	0.0111317
CAGAGGNCAAAGTCCA	HNF4a(NR),DR1/HepG2-HNF4a-ChIP-Seq(GSE25021)/Homer	384	31	0.0115028
AGAAATGACTTCCCT	ZNF528(Zf)/HEK293-ZNF528.GFP-ChIP-Seq(GSE58341)/Homer	379	32	0.0118738
TAGGGCAAAGGTCA	RXR(NR),DR1/3T3L1-RXR-ChIP-Seq(GSE13511)/Homer	378	33	0.0122449
CGGAAGTGAAAC	PU.1-IRF(ETS:IRF)/Bcell-PU.1-ChIP-Seq(GSE21512)/Homer	375	34	0.012616
AGAACAGNCTGTTCTT	ARE(NR)/LNCAP-AR-ChIP-Seq(GSE27824)/Homer	371	35	0.012987
TGACCTTTGCCCCA	PPARE(NR),DR1/3T3L1-Pparg-ChIP-Seq(GSE13511)/Homer	370	36	0.0133581
RGGTCADNNAGAGGTCAV	RAR:RXR(NR),DR5/ES-RAR-ChIP-Seq(GSE56893)/Homer	370	37	0.0137291
TGGGGAAGGGCM	ZNF467(Zf)/HEK293-ZNF467.GFP-ChIP-Seq(GSE58341)/Homer	369	38	0.0141002
GAGGTCAAAGGTCA	TR4(NR),DR1/Hela-TR4-ChIP-Seq(GSE24685)/Homer	368	39	0.0144712
NTNATGCAAYMNNHTGMAAY	CEBP:CEBP(bZIP)/MEF-Chop-ChIP-Seq(GSE35681)/Homer	368	40	0.0148423
ACTTTCACTTTC	PRDM1(Zf)/Hela-PRDM1-ChIP-Seq(GSE31477)/Homer	365	41	0.0152134
AACTACAATTCCCAGAATGC	GFY-Staf(?,Zf)/Promoter/Homer	365	42	0.0155844
AGTTTCAGTTTC	ISRE(IRF)/ThioMac-LPS-Expression(GSE23622)/Homer	362	43	0.0159555
TGCAGTTCCAANAGTGGCCA	CTCF-SatelliteElement(Zf?)/CD4+-CTCF-ChIP-Seq(Barski_et_al.)/Homer	360	44	0.0163265
NNNCTTTCCAGGAAA	Bcl6(Zf)/Liver-Bcl6-ChIP-Seq(GSE31578)/Homer	359	45	0.0166976
NNNVCTGWGYAAACASN	Fox:Ebox(Forkhead,bHLH)/Panc1-Foxa2-ChIP-Seq(GSE47459)/Homer	354	46	0.0170686
AGAGGAAGTG	PU.1(ETS)/ThioMac-PU.1-ChIP-Seq(GSE21512)/Homer	349	47	0.0174397
MA0481.1	FOXP1	347	48	0.0178108
CGGCTGCNGNNNNCAGATAA	GATA:SCL(Zf,bHLH)/Ter119-SCL-ChIP-Seq(GSE18720)/Homer	347	49	0.0181818
ATTTCCCAGVAKSCY	ZNF143|STAF(Zf)/CUTLL-ZNF143-ChIP-Seq(GSE29600)/Homer	347	50	0.0185529
RACTACAACTCCCAGVAKGC	Ronin(THAP)/ES-Thap11-ChIP-Seq(GSE51522)/Homer	344	51	0.0189239
ACAGGATGTGGT	ETS:RUNX(ETS,Runt)/Jurkat-RUNX1-ChIP-Seq(GSE17954)/Homer	344	52	0.019295
AAGGKGRCGCAGGCA	ZNF165(Zf)/WHIM12-ZNF165-ChIP-Seq(GSE65937)/Homer	344	53	0.019666
YTAATTRAWWCCAGATGT	Pitx1:Ebox(Homeobox,bHLH)/Hindlimb-Pitx1-ChIP-Seq(GSE41591)/Homer	337	54	0.0200371
ARGAGGMCAAAATGW	ZNF675(Zf)/HEK293-ZNF675.GFP-ChIP-Seq(GSE58341)/Homer	337	55	0.0204082
MA0598.1	EHF	336	56	0.0207792
CACAGCAGGGGG	Unknown-ESC-element(?)/mES-Nanog-ChIP-Seq(GSE11724)/Homer	335	57	0.0211503
GGYAGCAYDTGCTDCCCNNN	EBNA1(EBV-virus)/Raji-EBNA1-ChIP-Seq(GSE30709)/Homer	334	58	0.0215213
AAAGRGGAAGTG	SpiB(ETS)/OCILY3-SPIB-ChIP-Seq(GSE56857)/Homer	333	59	0.0218924
AGATGKDGAGATAAG	GATA3(Zf),DR4/iTreg-Gata3-ChIP-Seq(GSE20898)/Homer	333	60	0.0222635
CTGGCAGGCTGCCA	Tlx?(NR)/NPC-H3K4me1-ChIP-Seq(GSE16256)/Homer	332	61	0.0226345
ACTTTCGTTTCT	T1ISRE(IRF)/ThioMac-Ifnb-Expression/Homer	330	62	0.0230056
NNTTCTGGAANNTTCTAGAA	HRE(HSF)/HepG2-HSF1-ChIP-Seq(GSE31477)/Homer	330	63	0.0233766
GTCWGCTGTYYCTCT	ZNF317(Zf)/HEK293-ZNF317.GFP-ChIP-Seq(GSE58341)/Homer	328	64	0.0237477
GTAGGTCACTGGGTCA	Reverb(NR),DR2/RAW-Reverba.biotin-ChIP-Seq(GSE45914)/Homer	324	65	0.0241187
	E1-E2_motif	323	66	0.0244898
MA0081.1	SPIB	322	67	0.0248609
MA0161.1	NFIC	321	68	0.0252319
NNNGCATGTCCNGACATGCC	p63(p53)/Keratinocyte-p63-ChIP-Seq(GSE17611)/Homer	320	69	0.025603
NAGAACAGNCTGTTCT	GRE(NR),IR3/A549-GR-ChIP-Seq(GSE32465)/Homer	320	70	0.025974
NAGAACAGNCTGTTCT	GRE	320	71	0.0263451
AACATGCCCAGACATGCCCN	p53(p53)/Saos-p53-ChIP-Seq(GSE15780)/Homer	319	72	0.0267161
CNNBRGCGCCCCCTGSTGGC	BORIS(Zf)/K562-CTCFL-ChIP-Seq(GSE32465)/Homer	318	73	0.0270872
MA0474.1	Erg	317	74	0.0274583
NNNNNBAGATAWYATCTVHN	GATA(Zf),IR3/iTreg-Gata3-ChIP-Seq(GSE20898)/Homer	316	75	0.0278293
ATAGTGCCACCTGGTGGCCA	CTCF(Zf)/CD4+-CTCF-ChIP-Seq(Barski_et_al.)/Homer	312	76	0.0282004
AAGAACATWHTGTTC	PGR(NR)/EndoStromal-PGR-ChIP-Seq(GSE69539)/Homer	312	77	0.0285714
GGGGGGGG	Maz(Zf)/HepG2-Maz-ChIP-Seq(GSE31477)/Homer	310	78	0.0289425
GGGGGTGTGTCC	KLF10(Zf)/HEK293-KLF10.GFP-ChIP-Seq(GSE58341)/Homer	309	79	0.0293135
CTTGGCACNGTGCCAA	NF1(CTF)/LNCAP-NF1-ChIP-Seq(Unpublished)/Homer	308	80	0.0296846
AAACYKGTTWDACMRGTTTB	GRHL2(CP2)/HBE-GRHL2-ChIP-Seq(GSE46194)/Homer	304	81	0.0300557
NTGGGTGTGGCC	EKLF(Zf)/Erythrocyte-Klf1-ChIP-Seq(GSE20478)/Homer	302	82	0.0304267
ANTTMRCASBNNNGTGYKAAN	Brachyury(T-box)/Mesoendoderm-Brachyury-ChIP-exo(GSE54963)/Homer	301	83	0.0307978
YCTTTGTTCC	Sox4(HMG)/proB-Sox4-ChIP-Seq(GSE50066)/Homer	300	84	0.0311688
TTCTAGAABNTTCTA	HRE(HSF)/Striatum-HSF1-ChIP-Seq(GSE38000)/Homer	299	85	0.0315399
MA0136.1	ELF5	295	86	0.0319109
ADGGYAGYAGCATCT	PRDM9(Zf)/Testis-DMC1-ChIP-Seq(GSE35498)/Homer	294	87	0.032282
MA0514.1	Sox3	293	88	0.0326531
CCATTGTATGCAAAT	Oct4:Sox17(POU,Homeobox,HMG)/F9-Sox17-ChIP-Seq(GSE44553)/Homer	291	89	0.0330241
ATTTCTNAGAAA	STAT5(Stat)/mCD4+-Stat5-ChIP-Seq(GSE12346)/Homer	291	90	0.0333952
ATTTGCATAACAATG	OCT4-SOX2-TCF-NANOG(POU,Homeobox,HMG)/mES-Oct4-ChIP-Seq(GSE11431)/Homer	291	91	0.0337662
VAGRACAKNCTGTBC	PR(NR)/T47D-PR-ChIP-Seq(GSE31130)/Homer	289	92	0.0341373
GGGGCTYGKCTGGGA	Zfp809(Zf)/ES-Zfp809-ChIP-Seq(GSE70799)/Homer	289	93	0.0345083
ACATCAAAGGGA	Tcf4(HMG)/Hct116-Tcf4-ChIP-Seq(SRA012054)/Homer	289	94	0.0348794
GCCACRCCCACY	Klf9(Zf)/GBM-Klf9-ChIP-Seq(GSE62211)/Homer	282	95	0.0352505
MA0041.1	Foxd3	280	96	0.0356215
AWWNTGCTGAGTCAT	Bach1(bZIP)/K562-Bach1-ChIP-Seq(GSE31477)/Homer	280	97	0.0359926
NTTTCCAGGAAA	STAT4(Stat)/CD4-Stat4-ChIP-Seq(GSE22104)/Homer	278	98	0.0363636
AACAGGAAGT	Ets1-distal(ETS)/CD4+-PolII-ChIP-Seq(Barski_et_al.)/Homer	278	99	0.0367347
NRGCCCCRCCCHBNN	KLF3(Zf)/MEF-Klf3-ChIP-Seq(GSE44748)/Homer	278	100	0.0371058
AGCAGCTGCTGC	MyoD(bHLH)/Myotube-MyoD-ChIP-Seq(GSE21614)/Homer	273	101	0.0374768
GTCATGCHTGRCTGS	Pax8(Paired,Homeobox)/Thyroid-Pax8-ChIP-Seq(GSE26938)/Homer	273	102	0.0378479
AGGTCAAGGTCA	RARg(NR)/ES-RARg-ChIP-Seq(GSE30538)/Homer	273	103	0.0382189
RGKGGGCGKGGC	KLF14(Zf)/HEK293-KLF14.GFP-ChIP-Seq(GSE58341)/Homer	272	104	0.03859
NGTGTTCAVTSAAGCGKAAA	PAX6(Paired,Homeobox)/Forebrain-Pax6-ChIP-Seq(GSE66961)/Homer	270	105	0.038961
MA0065.2	PPARG::RXRA	270	106	0.0393321
NATTTCCNGGAAAT	STAT1(Stat)/HelaS3-STAT1-ChIP-Seq(GSE12782)/Homer	268	107	0.0397032
VAGRACAKWCTGTYC	GRE(NR),IR3/RAW264.7-GRE-ChIP-Seq(Unpublished)/Homer	268	108	0.0400742
MA0080.3	Spi1	262	109	0.0404453
ATTTCCTGTN	EWS:ERG-fusion(ETS)/CADO_ES1-EWS:ERG-ChIP-Seq(SRA014231)/Homer	262	110	0.0408163
GTCCCCAGGGGA	EBF1(EBF)/Near-E2A-ChIP-Seq(GSE21512)/Homer	258	111	0.0411874
GGTCANYTGAGGWCA	THRa(NR)/C17.2-THRa-ChIP-Seq(GSE38347)/Homer	256	112	0.0415584
CNCTTCCNGGAAGN	Stat3+il21(Stat)/CD4-Stat3-ChIP-Seq(GSE19198)/Homer	255	113	0.0419295
HWWGTCAGCAWWTTT	MafF(bZIP)/HepG2-MafF-ChIP-Seq(GSE31477)/Homer	254	114	0.0423006
ATTTTCCATT	NFAT(RHD)/Jurkat-NFATC1-ChIP-Seq(Jolma_et_al.)/Homer	253	115	0.0426716
ANTTCTTAAGAA	STAT6(Stat)/CD4-Stat6-ChIP-Seq(GSE22104)/Homer	251	116	0.0430427
GSCTGTCACTCA	PBX1(Homeobox)/MCF7-PBX1-ChIP-Seq(GSE28007)/Homer	248	117	0.0434137
AAAGTAAACA	FOXA1(Forkhead)/MCF7-FOXA1-ChIP-Seq(GSE26831)/Homer	246	118	0.0437848
AGGTCAAGGTCA	RAR:RXR(NR),DR5/ES-RAR-ChIP-Seq(GSE56893)/Homer	246	119	0.0441558
CNGTCCTCCC	Znf263(Zf)/K562-Znf263-ChIP-Seq(GSE31477)/Homer	246	120	0.0445269
GGTTGCCATGGCAA	X-box(HTH)/NPC-H3K4me1-ChIP-Seq(GSE16256)/Homer	246	121	0.044898
AGGTGHCAGACA	Tbox:Smad(T-box,MAD)/ESCd5-Smad2_3-ChIP-Seq(GSE29422)/Homer	245	122	0.045269
AAGGTCACNGTGACC	ERE(NR),IR3/MCF7-ERa-ChIP-Seq(Unpublished)/Homer	245	123	0.0456401
AGGVNCCTTTGT	Sox9(HMG)/Limb-SOX9-ChIP-Seq(GSE73225)/Homer	244	124	0.0460111
ACAGGAAGTG	ERG(ETS)/VCaP-ERG-ChIP-Seq(GSE14097)/Homer	243	125	0.0463822
AAAGTAAACA	FOXA1(Forkhead)/LNCAP-FOXA1-ChIP-Seq(GSE27824)/Homer	242	126	0.0467532
CTTGTTTACATA	Foxa2(Forkhead)/Liver-Foxa2-ChIP-Seq(GSE25694)/Homer	242	127	0.0471243
GCCACACCCA	Klf4(Zf)/mES-Klf4-ChIP-Seq(GSE11431)/Homer	242	128	0.0474954
GAAASYGAAASY	IRF2(IRF)/Erythroblas-IRF2-ChIP-Seq(GSE36985)/Homer	242	129	0.0478664
WWTRTAAACAVG	FoxL2(Forkhead)/Ovary-FoxL2-ChIP-Seq(GSE60858)/Homer	241	130	0.0482375
MA0442.1	SOX10	241	131	0.0486085
NWAACCACADNN	RUNX2(Runt)/PCa-RUNX2-ChIP-Seq(GSE33889)/Homer	240	132	0.0489796
TWGHWACAWTGTWDC	DMRT1(DM)/Testis-DMRT1-ChIP-Seq(GSE64892)/Homer	238	133	0.0493506
ACAGCTGCTG	Tcf12(bHLH)/GM12878-Tcf12-ChIP-Seq(GSE32465)/Homer	237	134	0.0497217
NTAATTDGCYAATTANNWWD	Pax7(Paired,Homeobox),longest/Myoblast-Pax7-ChIP-Seq(GSE25064)/Homer	235	135	0.0500928
GGTCCCTAGGGA	EBF(EBF)/proBcell-EBF-ChIP-Seq(GSE21978)/Homer	235	136	0.0504638
CCTGTCAATCAN	Pbx3(Homeobox)/GM12878-PBX3-ChIP-Seq(GSE32465)/Homer	233	137	0.0508349
CCAGGAACAG	AR-halfsite(NR)/LNCaP-AR-ChIP-Seq(GSE27824)/Homer	233	138	0.0512059
VNAVCAGCTGGC	Atoh1(bHLH)/Cerebellum-Atoh1-ChIP-Seq(GSE22111)/Homer	228	139	0.051577
YDGHTACAWTGTADC	DMRT6(DM)/Testis-DMRT6-ChIP-Seq(GSE60440)/Homer	228	140	0.0519481
HTGCTGAGTCAT	Nrf2(bZIP)/Lymphoblast-Nrf2-ChIP-Seq(GSE37589)/Homer	227	141	0.0523191
NAGATWNBNATCTNN	GATA(Zf),IR4/iTreg-Gata3-ChIP-Seq(GSE20898)/Homer	226	142	0.0526902
DCYAAAAATAGM	Mef2c(MADS)/GM12878-Mef2c-ChIP-Seq(GSE32465)/Homer	224	143	0.0530612
ACAGGAAGTG	ETS1(ETS)/Jurkat-ETS1-ChIP-Seq(GSE17954)/Homer	224	144	0.0534323
GCTGTGGTTT	RUNX-AML(Runt)/CD4+-PolII-ChIP-Seq(Barski_et_al.)/Homer	224	145	0.0538033
TGACCTTTNCNT	Nur77(NR)/K562-NR4A1-ChIP-Seq(GSE31363)/Homer	224	146	0.0541744
AACAGGAAAT	EWS:FLI1-fusion(ETS)/SK_N_MC-EWS:FLI1-ChIP-Seq(SRA014231)/Homer	223	147	0.0545455
RAACAATGGN	Sox15(HMG)/CPA-Sox15-ChIP-Seq(GSE62909)/Homer	222	148	0.0549165
NGNTCTAGAACCNGV	ZBTB12(Zf)/HEK293-ZBTB12.GFP-ChIP-Seq(GSE58341)/Homer	222	149	0.0552876
GGTGYTGACAGS	Tbx20(T-box)/Heart-Tbx20-ChIP-Seq(GSE29636)/Homer	221	150	0.0556586
NAACAGCTGG	Tcf21(bHLH)/ArterySmoothMuscle-Tcf21-ChIP-Seq(GSE61369)/Homer	220	151	0.0560297
CAAAGGTCAG	Erra(NR)/HepG2-Erra-ChIP-Seq(GSE31477)/Homer	220	152	0.0564007
CCWTTGTYYB	Sox10(HMG)/SciaticNerve-Sox3-ChIP-Seq(GSE35132)/Homer	220	153	0.0567718
NYYTGTTTACHN	FOXP1(Forkhead)/H9-FOXP1-ChIP-Seq(GSE31006)/Homer	220	154	0.0571429
ACATCAAAGG	Tcf3(HMG)/mES-Tcf3-ChIP-Seq(GSE11724)/Homer	219	155	0.0575139
GATGACTCAGCA	NF-E2(bZIP)/K562-NFE2-ChIP-Seq(GSE31477)/Homer	219	156	0.057885
AVCAGGAAGT	EHF(ETS)/LoVo-EHF-ChIP-Seq(GSE49402)/Homer	217	157	0.058256
ANACAGCTGC	E2A(bHLH)/proBcell-E2A-ChIP-Seq(GSE21978)/Homer	217	158	0.0586271
NAAACCGGTTCAAACCGGTT	Tcfcp2l1(CP2)/mES-Tcfcp2l1-ChIP-Seq(GSE11431)/Homer	216	159	0.0589981
GCTGASTCAGCA	MafK(bZIP)/C2C12-MafK-ChIP-Seq(GSE36030)/Homer	216	160	0.0593692
MA0505.1	Nr5a2	215	161	0.0597403
MA0098.2	Ets1	214	162	0.0601113
AAACCACAAA	RUNX1(Runt)/Jurkat-RUNX1-ChIP-Seq(GSE29180)/Homer	211	163	0.0604824
HTTTCCCASG	Rbpj1(?)/Panc1-Rbpj1-ChIP-Seq(GSE47459)/Homer	210	164	0.0608534
WDNCTGGGCA	ZNF416(Zf)/HEK293-ZNF416.GFP-ChIP-Seq(GSE58341)/Homer	209	165	0.0612245
CCCATTGTTC	Sox2(HMG)/mES-Sox2-ChIP-Seq(GSE11431)/Homer	209	166	0.0615955
NNVVCAGCTGBN	Ascl1(bHLH)/NeuralTubes-Ascl1-ChIP-Seq(GSE55840)/Homer	207	167	0.0619666
ATGCCCTGAGGC	AP-2alpha(AP2)/Hela-AP2alpha-ChIP-Seq(GSE31477)/Homer	207	168	0.0623377
NNAYTTCCTGHN	Etv2(ETS)/ES-ER71-ChIP-Seq(GSE59402)/Homer(0.967)	207	169	0.0627087
BAACAGCTGT	Myf5(bHLH)/GM-Myf5-ChIP-Seq(GSE24852)/Homer	206	170	0.0630798
TRTTTACTTW	FOXM1(Forkhead)/MCF7-FOXM1-ChIP-Seq(GSE72977)/Homer	205	171	0.0634508
SCHTGTTTACAT	FOXK2(Forkhead)/U2OS-FOXK2-ChIP-Seq(E-MTAB-2204)/Homer	205	172	0.0638219
ACWTCAAAGG	TCFL2(HMG)/K562-TCF7L2-ChIP-Seq(GSE29196)/Homer	205	173	0.0641929
AACAGCTG	MyoG(bHLH)/C2C12-MyoG-ChIP-Seq(GSE36024)/Homer	205	174	0.064564
AACATCTGGA	ZBTB18(Zf)/HEK293-ZBTB18.GFP-ChIP-Seq(GSE58341)/Homer	204	175	0.0649351
GCTATTTTTAGC	Mef2d(MADS)/Retina-Mef2d-ChIP-Seq(GSE61391)/Homer	204	176	0.0653061
GGTTGCCATGGCAA	Rfx1(HTH)/NPC-H3K4me1-ChIP-Seq(GSE16256)/Homer	203	177	0.0656772
MA0039.2	Klf4	202	178	0.0660482
AGGTCANTGACCTN	FXR(NR),IR1/Liver-FXR-ChIP-Seq(Chong_et_al.)/Homer	202	179	0.0664193
GRTGMTRGAGCC	ZNF415(Zf)/HEK293-ZNF415.GFP-ChIP-Seq(GSE58341)/Homer	202	180	0.0667904
SCCTSAGGSCAW	AP-2gamma(AP2)/MCF7-TFAP2C-ChIP-Seq(GSE21234)/Homer	201	181	0.0671614
ACAGCTGTTN	Ptf1a(bHLH)/Panc1-Ptf1a-ChIP-Seq(GSE47459)/Homer	201	182	0.0675325
MA0130.1	ZNF354C	200	183	0.0679035
SCTGTCAVTCAV	Pknox1(Homeobox)/ES-Prep1-ChIP-Seq(GSE63282)/Homer	199	184	0.0682746
MA0461.1	Atoh1	199	185	0.0686456
GCCATCTGTT	NeuroD1(bHLH)/Islet-NeuroD1-ChIP-Seq(GSE30298)/Homer	199	186	0.0690167
NAHCAGCTGD	Ap4(bHLH)/AML-Tfap4-ChIP-Seq(GSE45738)/Homer	199	187	0.0693878
TGGAACAGMA	ZNF189(Zf)/HEK293-ZNF189.GFP-ChIP-Seq(GSE58341)/Homer	197	188	0.0697588
ACTACAATTCCC	GFY(?)/Promoter/Homer	197	189	0.0701299
ATGAATATTCATGAG	OCT:OCT(POU,Homeobox)/NPC-Brn1-ChIP-Seq(GSE35496)/Homer	196	190	0.0705009
NNCACCTGCN	E2A(bHLH),near_PU.1/Bcell-PU.1-ChIP-Seq(GSE21512)/Homer	195	191	0.070872
AAATCACTGC	Gfi1b(Zf)/HPC7-Gfi1b-ChIP-Seq(GSE22178)/Homer	195	192	0.071243
CAAACCACAG	RUNX(Runt)/HPC7-Runx1-ChIP-Seq(GSE22178)/Homer	195	193	0.0716141
MA0002.2	RUNX1	194	194	0.0719852
TTCAAGGTCA	Nr5a2(NR)/mES-Nr5a2-ChIP-Seq(GSE19019)/Homer	194	195	0.0723562
TTCCKNAGAA	STAT6(Stat)/Macrophage-Stat6-ChIP-Seq(GSE38377)/Homer	193	196	0.0727273
MA0042.1	FOXI1	189	197	0.0730983
MA0499.1	Myod1	189	198	0.0734694
BTCAAGGTCA	Nr5a2(NR)/Pancreas-LRH1-ChIP-Seq(GSE34295)/Homer	187	199	0.0738404
CCWGGAATGY	TEAD2(TEA)/Py2T-Tead2-ChIP-Seq(GSE55709)/Homer	187	200	0.0742115
MA0522.1	Tcf3	187	201	0.0745826
NCTGGAATGC	TEAD(TEA)/Fibroblast-PU.1-ChIP-Seq(Unpublished)/Homer	186	202	0.0749536
WATGCAAATGAG	Oct6(POU,Homeobox)/NPC-Pou3f1-ChIP-Seq(GSE35496)/Homer	185	203	0.0753247
TGCTGAGTCA	Bach2(bZIP)/OCILy7-Bach2-ChIP-Seq(GSE44420)/Homer	184	204	0.0756957
GGCCCCGCCCCC	Sp1(Zf)/Promoter/Homer	184	205	0.0760668
DGGGYGKGGC	KLF5(Zf)/LoVo-KLF5-ChIP-Seq(GSE49402)/Homer	183	206	0.0764378
GCTATTTTTGGM	Mef2b(MADS)/HEK293-Mef2b.V5-ChIP-Seq(GSE67450)/Homer	182	207	0.0768089
ACATGCCCGGGCAT	p53(p53)/mES-cMyc-ChIP-Seq(GSE11431)/Homer	181	208	0.07718
GCAGCCAAGCGTGACC	PAX5(Paired,Homeobox)/GM12878-PAX5-ChIP-Seq(GSE32465)/Homer	180	209	0.077551
GGGTTACTANAGGTCA	LXRE(NR),DR4/RAW-LXRb.biotin-ChIP-Seq(GSE21512)/Homer	178	210	0.0779221
CCWTTGTY	Sox3(HMG)/NPC-Sox3-ChIP-Seq(GSE33059)/Homer	178	211	0.0782931
TGCGTGGGYG	Egr1(Zf)/K562-Egr1-ChIP-Seq(GSE32465)/Homer	175	212	0.0786642
SCCTAGCAACAG	Rfx5(HTH)/GM12878-Rfx5-ChIP-Seq(GSE31477)/Homer	175	213	0.0790353
MA0160.1	NR4A2	173	214	0.0794063
TGCTGACTCA	MafA(bZIP)/Islet-MafA-ChIP-Seq(GSE30298)/Homer	170	215	0.0797774
CGGTTTCAAA	CHR(?)/Hela-CellCycle-Expression/Homer	170	216	0.0801484
MA0057.1	MZF1_5-13	169	217	0.0805195
ACVAGGAAGT	ELF5(ETS)/T47D-ELF5-ChIP-Seq(GSE30407)/Homer	169	218	0.0808905
ATATGCAAAT	Oct2(POU,Homeobox)/Bcell-Oct2-ChIP-Seq(GSE21512)/Homer	166	219	0.0812616
NATGASTCABNN	Fosl2(bZIP)/3T3L1-Fosl2-ChIP-Seq(GSE56872)/Homer	166	220	0.0816327
NCCTTATCTC	Gata2(Zf)/K562-GATA2-ChIP-Seq(GSE18829)/Homer	164	221	0.0820037
DATGASTCATHN	Atf3(bZIP)/GBM-ATF3-ChIP-Seq(GSE33912)/Homer	164	222	0.0823748
GATGACTCATCN	Jun-AP1(bZIP)/K562-cJun-ChIP-Seq(GSE31477)/Homer	163	223	0.0827458
CGGTTGCCATGGCAAC	RFX(HTH)/K562-RFX3-ChIP-Seq(SRA012198)/Homer	162	224	0.0831169
MA0500.1	Myog	162	225	0.0834879
TATGCWAATBAV	Brn1(POU,Homeobox)/NPC-Brn1-ChIP-Seq(GSE35496)/Homer	162	226	0.083859
MA0109.1	Hltf	162	227	0.0842301
AGGGGATTTCCC	NFkB-p65(RHD)/GM12787-p65-ChIP-Seq(GSE19485)/Homer	161	228	0.0846011
MA0597.1	THAP1	160	229	0.0849722
GTTGCCATGGCAACM	Rfx2(HTH)/LoVo-RFX2-ChIP-Seq(GSE49402)/Homer	159	230	0.0853432
CAGATAAGGN	Gata1(Zf)/K562-GATA1-ChIP-Seq(GSE18829)/Homer	158	231	0.0857143
TTGCCAAG	NF1-halfsite(CTF)/LNCaP-NF1-ChIP-Seq(Unpublished)/Homer	157	232	0.0860853
RCCATMTGTT	Olig2(bHLH)/Neuron-Olig2-ChIP-Seq(GSE30882)/Homer	157	233	0.0864564
CCATTGTTNY	Sox6(HMG)/Myotubes-Sox6-ChIP-Seq(GSE32627)/Homer	157	234	0.0868275
MA0521.1	Tcf12	156	235	0.0871985
VGCTGWCAVB	Meis1(Homeobox)/MastCells-Meis1-ChIP-Seq(GSE48085)/Homer	156	236	0.0875696
ANCAGCTG	SCL(bHLH)/HPC7-Scl-ChIP-Seq(GSE13511)/Homer	156	237	0.0879406
CCTGCTGAGH	Zic(Zf)/Cerebellum-ZIC1.2-ChIP-Seq(GSE60731)/Homer	156	238	0.0883117
MA0092.1	Hand1::Tcfe2a	153	239	0.0886827
ATGAATWATTCATGA	OCT:OCT(POU,Homeobox,IR1)/NPC-Brn2-ChIP-Seq(GSE35496)/Homer	152	240	0.0890538
MA0154.2	EBF1	150	241	0.0894249
AGGTGTGAAM	Tbet(T-box)/CD8-Tbet-ChIP-Seq(GSE33802)/Homer	150	242	0.0897959
NNTGTGGATTSS	Foxh1(Forkhead)/hESC-FOXH1-ChIP-Seq(GSE29422)/Homer	149	243	0.090167
GGTTAAACATTAAC	Hnf1(Homeobox)/Liver-Foxa2-Chip-Seq(GSE25694)/Homer	149	244	0.090538
NNATGASTCATH	Fra1(bZIP)/BT549-Fra1-ChIP-Seq(GSE46166)/Homer	148	245	0.0909091
NGCGTGGGCGGR	Egr2(Zf)/Thymocytes-Egr2-ChIP-Seq(GSE34254)/Homer	148	246	0.0912801
CTGTTTAC	Foxo1(Forkhead)/RAW-Foxo1-ChIP-Seq(Fan_et_al.)/Homer	147	247	0.0916512
AGGTCTCTAACC	PRDM14(Zf)/H1-PRDM14-ChIP-Seq(GSE22767)/Homer	147	248	0.0920223
ATTAACACCT	Eomes(T-box)/H9-Eomes-ChIP-Seq(GSE26097)/Homer	146	249	0.0923933
YCTTATCTBN	Gata6(Zf)/HUG1N-GATA6-ChIP-Seq(GSE51936)/Homer	146	250	0.0927644
CCTTTTATAGCC	TATA-Box(TBP)/Promoter/Homer	146	251	0.0931354
CGTGGGTGGTCC	GLI3(Zf)/Limb-GLI3-ChIP-Chip(GSE11077)/Homer	145	252	0.0935065
GGATGACTCATC	Fra2(bZIP)/Striatum-Fra2-ChIP-Seq(GSE43429)/Homer	145	253	0.0938776
ACATCCTGGT	SPDEF(ETS)/VCaP-SPDEF-ChIP-Seq(SRA014231)/Homer	144	254	0.0942486
GTGACCTTGA	Esrrb(NR)/mES-Esrrb-ChIP-Seq(GSE11431)/Homer	143	255	0.0946197
NCYAATAAAA	HOXD13(Homeobox)/Chicken-Hoxd13-ChIP-Seq(GSE38910)/Homer	143	256	0.0949907
ATGACTCATC	AP-1(bZIP)/ThioMac-PU.1-ChIP-Seq(GSE21512)/Homer	141	257	0.0953618
MA0050.2	IRF1	141	258	0.0957328
GTCATAAAAN	Cdx2(Homeobox)/mES-Cdx2-ChIP-Seq(GSE14586)/Homer	141	259	0.0961039
GKVTCADRTTWC	Six1(Homeobox)/Myoblast-Six1-ChIP-Chip(GSE20150)/Homer	140	260	0.096475
MA0475.1	FLI1	139	261	0.096846
MA0144.2	STAT3	139	262	0.0972171
VCAGCTGBNN	HEB(bHLH)/mES-Heb-ChIP-Seq(GSE53233)/Homer	138	263	0.0975881
ATTTGCATAA	Oct4(POU,Homeobox)/mES-Oct4-ChIP-Seq(GSE11431)/Homer	137	264	0.0979592
AAGCACTTAA	Nkx3.1(Homeobox)/LNCaP-Nkx3.1-ChIP-Seq(GSE28264)/Homer	137	265	0.0983302
CAAGGHCANV	SF1(NR)/H295R-Nr5a1-ChIP-Seq(GSE44220)/Homer	135	266	0.0987013
GYCATCMATCAT	HOXA2(Homeobox)/mES-Hoxa2-ChIP-Seq(Donaldson_et_al.)/Homer	135	267	0.0990724
GWAAYHTGAKMC	Six2(Homeobox)/NephronProgenitor-Six2-ChIP-Seq(GSE39837)/Homer	134	268	0.0994434
ATGCATAATTCA	Pit1+1bp(Homeobox)/GCrat-Pit1-ChIP-Seq(GSE58009)/Homer	132	269	0.0998145
CCAAAAATAG	Mef2a(MADS)/HL1-Mef2a.biotin-ChIP-Seq(GSE21529)/Homer	132	270	0.100186
NATGTTGCAA	CEBP:AP1(bZIP)/ThioMac-CEBPb-ChIP-Seq(GSE21512)/Homer	131	271	0.100557
DATGASTCAT	BATF(bZIP)/Th17-BATF-ChIP-Seq(GSE39756)/Homer	131	272	0.100928
AGGCCTGG	ZFX(Zf)/mES-Zfx-ChIP-Seq(GSE11431)/Homer	130	273	0.101299
AASCACTCAA	Nkx2.5(Homeobox)/HL1-Nkx2.5.biotin-ChIP-Seq(GSE21529)/Homer	129	274	0.10167
VBSYGTCTGG	Smad4(MAD)/ESC-SMAD4-ChIP-Seq(GSE29422)/Homer	129	275	0.102041
TTTTATKRGG	HOXB13(Homeobox)/ProstateTumor-HOXB13-ChIP-Seq(GSE56288)/Homer	129	276	0.102412
CTTCCGGGAA	Stat3(Stat)/mES-Stat3-ChIP-Seq(GSE11431)/Homer	128	277	0.102783
TWGTCTGV	Smad3(MAD)/NPC-Smad3-ChIP-Seq(GSE36673)/Homer	127	278	0.103154
CAAGATGGCGGC	YY1(Zf)/Promoter/Homer	127	279	0.103525
MA0508.1	PRDM1	125	280	0.103896
RSCACTYRAG	Nkx2.1(Homeobox)/LungAC-Nkx2.1-ChIP-Seq(GSE43252)/Homer	124	281	0.104267
MA0095.2	YY1	124	282	0.104638
GGCCATAAATCA	HOXA9(Homeobox)/HSC-Hoxa9-ChIP-Seq(GSE33509)/Homer	124	283	0.105009
MA0497.1	MEF2C	120	284	0.10538
BTBRAGTGSN	Nkx2.2(Homeobox)/NPC-Nkx2.2-ChIP-Seq(GSE61673)/Homer	120	285	0.105751
NGYCATAAAWCH	CDX4(Homeobox)/ZebrafishEmbryos-Cdx4.Myc-ChIP-Seq(GSE48254)/Homer	119	286	0.106122
CCWGGAATGY	TEAD4(TEA)/Tropoblast-Tead4-ChIP-Seq(GSE37350)/Homer	119	287	0.106494
AACCGGAAGT	ETV1(ETS)/GIST48-ETV1-ChIP-Seq(GSE22441)/Homer	118	288	0.106865
TRAGGTCA	THRb(NR)/Liver-NR1A2-ChIP-Seq(GSE52613)/Homer	117	289	0.107236
TTRAGTGSYK	Bapx1(Homeobox)/VertebralCol-Bapx1-ChIP-Seq(GSE36672)/Homer	114	290	0.107607
TGATTRATGGCY	Hoxb4(Homeobox)/ES-Hoxb4-ChIP-Seq(GSE34014)/Homer	110	291	0.107978
AGRGGTCA	COUP-TFII(NR)/Artia-Nr2f2-ChIP-Seq(GSE46497)/Homer	110	292	0.108349
DGTAAACA	Foxo3(Forkhead)/U2OS-Foxo3-ChIP-Seq(E-MTAB-2701)/Homer	110	293	0.10872
ACTGAAACCA	IRF4(IRF)/GM12878-IRF4-ChIP-Seq(GSE32465)/Homer	110	294	0.109091
CCATATATGGNA	CArG(MADS)/PUER-Srf-ChIP-Seq(Sullivan_et_al.)/Homer	110	295	0.109462
NRRTGACGTCAT	Atf2(bZIP)/3T3L1-Atf2-ChIP-Seq(GSE56872)/Homer	110	296	0.109833
MA0512.1	Rxra	110	297	0.110204
MA0498.1	Meis1	109	298	0.110575
ACCGTGACTAATTNN	PAX3:FKHR-fusion(Paired,Homeobox)/Rh4-PAX3:FKHR-ChIP-Seq(GSE19063)/Homer	107	299	0.110946
GGCCATAAATCA	Hoxc9(Homeobox)/Ainv15-Hoxc9-ChIP-Seq(GSE21812)/Homer	104	300	0.111317
GTCACGCTCNCTGA	PAX5(Paired,Homeobox),condensed/GM12878-PAX5-ChIP-Seq(GSE32465)/Homer	103	301	0.111688
CGGTCACGCCAC	Srebp2(bHLH)/HepG2-Srebp2-ChIP-Seq(GSE31477)/Homer	102	302	0.112059
YTGWCADY	Tgif1(Homeobox)/mES-Tgif1-ChIP-Seq(GSE55404)/Homer	101	303	0.11243
AGGTGTCA	Tbx5(T-box)/HL1-Tbx5.biotin-ChIP-Seq(GSE21529)/Homer	101	304	0.112801
ATGMATATDC	Pit1(Homeobox)/GCrat-Pit1-ChIP-Seq(GSE58009)/Homer	99.4	305	0.113173
GGGGGAATCCCC	NFkB-p50,p52(RHD)/Monocyte-p50-ChIP-Chip(Schreiber_et_al.)/Homer	98.9	306	0.113544
ATTGCATCAT	Chop(bZIP)/MEF-Chop-ChIP-Seq(GSE35681)/Homer	98.3	307	0.113915
MA0156.1	FEV	98	308	0.114286
NBWGATAAGR	Gata4(Zf)/Heart-Gata4-ChIP-Seq(GSE35151)/Homer	97	309	0.114657
MA0515.1	Sox6	95.2	310	0.115028
MA0473.1	ELF1	94.7	311	0.115399
GGCAATTAAA	Unknown(Homeobox)/Limb-p300-ChIP-Seq/Homer	94.5	312	0.11577
CTGTCTGG	Smad2(MAD)/ES-SMAD2-ChIP-Seq(GSE29422)/Homer	94.3	313	0.116141
TCATCAATCA	Pdx1(Homeobox)/Islet-Pdx1-ChIP-Seq(SRA008281)/Homer	92.6	314	0.116512
AACCGGAAGT	GABPA(ETS)/Jurkat-GABPa-ChIP-Seq(GSE17954)/Homer	91.5	315	0.116883
MA0007.2	AR	91.1	316	0.117254
MTGATGCAAT	Atf4(bZIP)/MEF-Atf4-ChIP-Seq(GSE35681)/Homer	90.5	317	0.117625
MA0149.1	EWSR1-FLI1	88.8	318	0.117996
MA0493.1	Klf1	88	319	0.118367
MA0157.1	FOXO3	87.8	320	0.118738
AAYTAGGTCA	RORgt(NR)/EL4-RORgt.Flag-ChIP-Seq(GSE56019)/Homer	87.3	321	0.119109
MA0511.1	RUNX2	87	322	0.119481
ATGACGTCATCC	c-Jun-CRE(bZIP)/K562-cJun-ChIP-Seq(GSE31477)/Homer	85	323	0.119852
MA0486.1	HSF1	83.9	324	0.120223
TGTCANYT	Tgif2(Homeobox)/mES-Tgif2-ChIP-Seq(GSE55404)/Homer	82.6	325	0.120594
GGAAATTCCC	NFkB-p65-Rel(RHD)/ThioMac-LPS-Expression(GSE23622)/Homer	82.5	326	0.120965
MA0518.1	Stat4	80.8	327	0.121336
AGGCCTAG	ZNF711(Zf)/SHSY5Y-ZNF711-ChIP-Seq(GSE20673)/Homer	80.5	328	0.121707
GAGSCCGAGC	ZNF519(Zf)/HEK293-ZNF519.GFP-ChIP-Seq(GSE58341)/Homer	80.4	329	0.122078
MA0087.1	Sox5	80.1	330	0.122449
MA0524.1	TFAP2C	79.8	331	0.12282
NGRTGACGTCAY	Atf7(bZIP)/3T3L1-Atf7-ChIP-Seq(GSE56872)/Homer	78.8	332	0.123191
MA0519.1	Stat5a::Stat5b	78.4	333	0.123562
ATGAATATTC	Brn2(POU,Homeobox)/NPC-Brn2-ChIP-Seq(GSE35496)/Homer	78.4	334	0.123933
AGATAASR	GATA3(Zf)/iTreg-Gata3-ChIP-Seq(GSE20898)/Homer	75.7	335	0.124304
MA0112.2	ESR1	75.6	336	0.124675
GGCGGGAARN	E2F6(E2F)/Hela-E2F6-ChIP-Seq(GSE31477)/Homer	75.6	337	0.125046
GTGGGCCCCA	ZNF692(Zf)/HEK293-ZNF692.GFP-ChIP-Seq(GSE58341)/Homer	75.4	338	0.125417
YTAATYNRATTA	Phox2a(Homeobox)/Neuron-Phox2a-ChIP-Seq(GSE31456)/Homer	74.5	339	0.125788
ATCACCCCAT	Srebp1a(bHLH)/HepG2-Srebp1a-ChIP-Seq(GSE31477)/Homer	74.3	340	0.12616
MA0099.2	JUN::FOS	73.1	341	0.126531
MA0052.2	MEF2A	71.8	342	0.126902
NRYTTCCGGH	Fli1(ETS)/CD8-FLI-ChIP-Seq(GSE20898)/Homer	71.6	343	0.127273
MA0484.1	HNF4G	69.8	344	0.127644
MA0088.1	znf143	69.7	345	0.128015
MA0133.1	BRCA1	69	346	0.128386
GGCCATTAAC	Nanog(Homeobox)/mES-Nanog-ChIP-Seq(GSE11724)/Homer	68.4	347	0.128757
RGGGCACTAACY	ZNF264(Zf)/HEK293-ZNF264.GFP-ChIP-Seq(GSE58341)/Homer	67.5	348	0.129128
MA0471.1	E2F6	66.3	349	0.129499
NYTAATCCYB	Otx2(Homeobox)/EpiLC-Otx2-ChIP-Seq(GSE56098)/Homer	65	350	0.12987
MA0113.2	NR3C1	64.8	351	0.130241
MA0103.2	ZEB1	63.8	352	0.130612
MA0517.1	STAT2::STAT1	63.6	353	0.130983
AGCCAATCGG	NFY(CCAAT)/Promoter/Homer	61.4	354	0.131354
TGGCAGTTGG	AMYB(HTH)/Testes-AMYB-ChIP-Seq(GSE44588)/Homer	58.5	355	0.131725
MA0084.1	SRY	58.4	356	0.132096
MA0141.2	Esrrb	57.4	357	0.132468
MA0258.2	ESR2	56.6	358	0.132839
MA0145.2	Tcfcp2l1	56.1	359	0.13321
RTCATGTGAC	MITF(bHLH)/MastCells-MITF-ChIP-Seq(GSE48085)/Homer	55.1	360	0.133581
MA0593.1	FOXP2	53	361	0.133952
MA0071.1	RORA_1	50.8	362	0.134323
MA0114.2	HNF4A	50.6	363	0.134694
MA0513.1	SMAD2::SMAD3::SMAD4	50.5	364	0.135065
MA0139.1	CTCF	50.1	365	0.135436
MA0520.1	Stat6	49.4	366	0.135807
MA0480.1	Foxo1	48.4	367	0.136178
MA0143.3	Sox2	48.2	368	0.136549
ACCACGTGGTCN	Max(bHLH)/K562-Max-ChIP-Seq(GSE31477)/Homer	47.8	369	0.13692
NNYTAATTAR	Lhx1(Homeobox)/EmbryoCarcinoma-Lhx1-ChIP-Seq(GSE70957)/Homer	46.7	370	0.137291
MA0463.1	Bcl6	45.1	371	0.137662
TAATCAATTA	Pax7(Paired,Homeobox)/Myoblast-Pax7-ChIP-Seq(GSE25064)/Homer	43.2	372	0.138033
MA0592.1	ESRRA	43.2	373	0.138404
TAATCCCN	Pitx1(Homeobox)/Chicken-Pitx1-ChIP-Seq(GSE38910)/Homer	40.6	374	0.138776
MA0503.1	Nkx2-5 (var.2)	39.4	375	0.139147
MA0003.2	TFAP2A	38.9	376	0.139518
MA0510.1	RFX5	38.4	377	0.139889
MA0122.1	Nkx3-2	38.1	378	0.14026
ADBTAATTAR	Lhx3(Homeobox)/Neuron-Lhx3-ChIP-Seq(GSE31456)/Homer	37.7	379	0.140631
MA0058.2	MAX	37.2	380	0.141002
HACTTCCGGY	Elk1(ETS)/Hela-Elk1-ChIP-Seq(GSE31477)/Homer	35.6	381	0.141373
MA0504.1	NR2C2	34.5	382	0.141744
MA0137.3	STAT1	33.5	383	0.142115
AACCGGAAGT	ELF1(ETS)/Jurkat-ELF1-ChIP-Seq(SRA014231)/Homer	33.4	384	0.142486
MA0027.1	En1	33.3	385	0.142857
HNRAATCAAT	Cux2(Homeobox)/Liver-Cux2-ChIP-Seq(GSE35985)/Homer	33	386	0.143228
MA0148.3	FOXA1	32.6	387	0.143599
KCCACGTGAC	NPAS2(bHLH)/Liver-NPAS2-ChIP-Seq(GSE39860)/Homer	32	388	0.14397
MA0017.1	NR2F1	31.4	389	0.144341
MA0142.1	Pou5f1::Sox2	30.9	390	0.144712
ATGACGTCATCN	JunD(bZIP)/K562-JunD-ChIP-Seq/Homer	30.2	391	0.145083
MA0108.2	TBP	30.1	392	0.145455
MA0151.1	ARID3A	28.9	393	0.145826
MA0146.2	Zfx	28.8	394	0.146197
AACCGGAAGT	ETS(ETS)/Promoter/Homer	27.9	395	0.146568
GTCACGTGGT	Usf2(bHLH)/C2C12-Usf2-ChIP-Seq(GSE36030)/Homer	27.9	396	0.146939
MA0483.1	Gfi1b	26.8	397	0.14731
CTAATKGV	Isl1(Homeobox)/Neuron-Isl1-ChIP-Seq(GSE31456)/Homer	25.6	398	0.147681
MA0507.1	POU2F2	25.4	399	0.148052
MA0526.1	USF2	25.3	400	0.148423
MA0502.1	NFYB	24.3	401	0.148794
MA0147.2	Myc	24.2	402	0.149165
TAATCHGATTAC	Pax7(Paired,Homeobox),long/Myoblast-Pax7-ChIP-Seq(GSE25064)/Homer	23.2	403	0.149536
MA0509.1	Rfx1	22.7	404	0.149907
MA0060.2	NFYA	22.5	405	0.150278
MA0038.1	Gfi1	21.9	406	0.150649
MA0031.1	FOXD1	21.8	407	0.15102
MA0495.1	MAFF	20.9	408	0.151391
MA0523.1	TCF7L2	20.9	409	0.151763
MA0048.1	NHLH1	20	410	0.152134
MA0093.2	USF1	20	411	0.152505
GARTGGTCATCGCCC	ZNF669(Zf)/HEK293-ZNF669.GFP-ChIP-Seq(GSE58341)/Homer	19.9	412	0.152876
MA0090.1	TEAD1	19.8	413	0.153247
MA0051.1	IRF2	19.7	414	0.153618
MA0496.1	MAFK	19	415	0.153989
MA0105.3	NFKB1	18.4	416	0.15436
MA0155.1	INSM1	15.9	417	0.154731
MA0478.1	FOSL2	15.9	418	0.155102
CWGGCGGGAA	E2F1(E2F)/Hela-E2F1-ChIP-Seq(GSE22478)/Homer	15.7	419	0.155473
MA0100.2	Myb	15.4	420	0.155844
MA0600.1	RFX2	15.3	421	0.156215
MA0083.2	SRF	14.9	422	0.156586
GATGACGTCA	Atf1(bZIP)/K562-ATF1-ChIP-Seq(GSE31477)/Homer	14.5	423	0.156957
MA0040.1	Foxq1	14.5	424	0.157328
ATTGCGCAAC	CEBP(bZIP)/ThioMac-CEBPb-ChIP-Seq(GSE21512)/Homer	14	425	0.157699
RGGATTAR	GSC(Homeobox)/FrogEmbryos-GSC-ChIP-Seq(DRA000576)/Homer	13.9	426	0.158071
MA0488.1	JUN	13.9	427	0.158442
MA0101.1	REL	13.6	428	0.158813
GNCCACGTGG	c-Myc(bHLH)/mES-cMyc-ChIP-Seq(GSE11431)/Homer	12.9	429	0.159184
VDTTTCCCGCCA	E2F7(E2F)/Hela-E2F7-ChIP-Seq(GSE32673)/Homer	11.9	430	0.159555
MA0490.1	JUNB	11.6	431	0.159926
MA0030.1	FOXF2	11.2	432	0.160297
NRYTTCCGGY	Elk4(ETS)/Hela-Elk4-ChIP-Seq(GSE31477)/Homer	11.2	433	0.160668
MA0462.1	BATF::JUN	11.2	434	0.161039
MA0492.1	JUND (var.2)	10.5	435	0.16141
TBGCACGCAA	Arnt:Ahr(bHLH)/MCF7-Arnt-ChIP-Seq(Lo_et_al.)/Homer	10.5	436	0.161781
MA0469.1	E2F3	10.3	437	0.162152
GCTAATCC	CRX(Homeobox)/Retina-Crx-ChIP-Seq(GSE20012)/Homer	9.65	438	0.162523
MA0477.1	FOSL1	9.42	439	0.162894
MA0525.1	TP63	9.4	440	0.163265
NHAACBGYYV	BMYB(HTH)/Hela-BMYB-ChIP-Seq(GSE27030)/Homer	8.72	441	0.163636
MA0111.1	Spz1	7.53	442	0.164007
MA0489.1	JUN (var.2)	7.21	443	0.164378
MA0476.1	FOS	6.57	444	0.16475
GKTAATGR	Nkx6.1(Homeobox)/Islet-Nkx6.1-ChIP-Seq(GSE40975)/Homer	6.53	445	0.165121
MA0494.1	Nr1h3::Rxra	5.99	446	0.165492
MA0591.1	Bach1::Mafk	4.94	447	0.165863
TAATTAGN	Lhx2(Homeobox)/HFSC-Lhx2-ChIP-Seq(GSE48068)/Homer	4.28	448	0.166234
MA0501.1	NFE2::MAF	3.71	449	0.166605
GNCCACGTGG	n-Myc(bHLH)/mES-nMyc-ChIP-Seq(GSE11431)/Homer	3.65	450	0.166976
MA0465.1	CDX2	3.64	451	0.167347
MA0150.2	Nfe2l2	3.51	452	0.167718
MA0078.1	Sox17	2.85	453	0.168089
MA0107.1	RELA	2.52	454	0.16846
MA0117.1	Mafb	2.16	455	0.168831
MA0479.1	FOXH1	1.48	456	0.169202
MA0047.2	Foxa2	1.48	457	0.169573
MA0135.1	Lhx3	1.36	458	0.169944
MA0164.1	Nr2e3	1.23	459	0.170315
MA0595.1	SREBF1	0.918	460	0.170686
MA0076.2	ELK4	0.865	461	0.171058
CGGTGACGTCAC	CRE(bZIP)/Promoter/Homer	0.505	462	0.171429
MA0036.2	GATA2	0.181	463	0.1718
